# Supplementary material
Source: publisher figshare collection journal article supplement (https://acs.figshare.com/ndownloader/files/8888491)
Supplement: Supplementary file 1 [file 8888491]

 
data_[(S1)2CuI](PF6)
 
_audit_creation_method            'SHELXL-2014/7'
_shelx_SHELXL_version_number      '2014/7'
_chemical_name_systematic         ?
_chemical_name_common             ?
_chemical_melting_point           ?
_chemical_formula_moiety           
 '2(C32 H44 Cu N4), 2(F6 P), C4 H10 O'
_chemical_formula_sum
 'C68 H98 Cu2 F12 N8 O P2' 
_chemical_formula_weight          1460.56

loop_
 _atom_type_symbol
 _atom_type_description
 _atom_type_scat_dispersion_real
 _atom_type_scat_dispersion_imag
 _atom_type_scat_source
 'C'  'C'   0.0181   0.0091
 'International Tables Vol C Tables 4.2.6.8 and 6.1.1.4'
 'H'  'H'   0.0000   0.0000
 'International Tables Vol C Tables 4.2.6.8 and 6.1.1.4'
 'N'  'N'   0.0311   0.0180
 'International Tables Vol C Tables 4.2.6.8 and 6.1.1.4'
 'F'  'F'   0.0727   0.0534
 'International Tables Vol C Tables 4.2.6.8 and 6.1.1.4'
 'P'  'P'   0.2955   0.4335
 'International Tables Vol C Tables 4.2.6.8 and 6.1.1.4'
 'Cu'  'Cu'  -1.9646   0.5888
 'International Tables Vol C Tables 4.2.6.8 and 6.1.1.4'
 'O'  'O'   0.0492   0.0322
 'International Tables Vol C Tables 4.2.6.8 and 6.1.1.4'
 
_space_group_crystal_system       monoclinic
_space_group_IT_number            4
_space_group_name_H-M_alt         'P 21'
_space_group_name_Hall            'P 2yb'
 
_shelx_space_group_comment
;
The symmetry employed for this shelxl refinement is uniquely defined
by the following loop, which should always be used as a source of
symmetry information in preference to the above space-group names.
They are only intended as comments.
;
 
loop_
 _space_group_symop_operation_xyz
 'x, y, z'
 '-x, y+1/2, -z'
 
_cell_length_a                    16.6953(2)
_cell_length_b                    9.71833(14)
_cell_length_c                    24.2042(4)
_cell_angle_alpha                 90
_cell_angle_beta                  107.5219(15)
_cell_angle_gamma                 90
_cell_volume                      3744.93(10)
_cell_formula_units_Z             2
_cell_measurement_temperature     110(2)
_cell_measurement_reflns_used     11709
_cell_measurement_theta_min       1.88
_cell_measurement_theta_max       72.09
 
_exptl_crystal_description        lath
_exptl_crystal_colour             yellow
_exptl_crystal_density_meas       ?
_exptl_crystal_density_method     ?
_exptl_crystal_density_diffrn     1.295          
_exptl_crystal_F_000              1532
_exptl_transmission_factor_min    ?
_exptl_transmission_factor_max    ?
_exptl_crystal_size_max           0.45
_exptl_crystal_size_mid           0.21
_exptl_crystal_size_min           0.07
_exptl_absorpt_coefficient_mu     1.738
_shelx_estimated_absorpt_T_min    ?
_shelx_estimated_absorpt_T_max    ?
_exptl_absorpt_correction_type    analytical
_exptl_absorpt_correction_T_min   0.624
_exptl_absorpt_correction_T_max   0.903
_exptl_absorpt_process_details    
;
CrysAlisPro, Agilent Technologies,
Version 1.171.36.32 (release 02-08-2013 CrysAlis171 .NET)
(compiled Aug  2 2013,16:46:58)
Analytical numeric absorption correction using a multifaceted crystal
			model based on expressions derived by R.C. Clark & J.S. Reid.
(Clark, R. C. & Reid, J. S. (1995). Acta Cryst. A51, 887-897)
;
_exptl_absorpt_special_details    ?
_diffrn_ambient_temperature       110(2)
_diffrn_radiation_wavelength      1.54178
_diffrn_radiation_type            CuK\a
_diffrn_radiation_source          'SuperNova (Cu) X-ray Source' 
_diffrn_radiation_monochromator   'mirror' 
_diffrn_measurement_device_type   'SuperNova, Dual, Cu at zero, Atlas' 
_diffrn_measurement_method        '\w scans'
_diffrn_standards_number          '.'
_diffrn_standards_interval_time   '.'
_diffrn_standards_decay_%         '.'
_diffrn_reflns_number             23883
_diffrn_reflns_av_unetI/netI      0.0304
_diffrn_reflns_av_R_equivalents   0.0205
_diffrn_reflns_limit_h_min        -20
_diffrn_reflns_limit_h_max        18
_diffrn_reflns_limit_k_min        -11
_diffrn_reflns_limit_k_max        11
_diffrn_reflns_limit_l_min        -29
_diffrn_reflns_limit_l_max        28
_diffrn_reflns_theta_min          1.914
_diffrn_reflns_theta_max          71.891
_diffrn_reflns_theta_full         67.679
_diffrn_measured_fraction_theta_max   1.000
_diffrn_measured_fraction_theta_full  1.000
_diffrn_reflns_Laue_measured_fraction_max    1.000
_diffrn_reflns_Laue_measured_fraction_full   1.000
_diffrn_reflns_point_group_measured_fraction_max   0.847
_diffrn_reflns_point_group_measured_fraction_full  0.859
_reflns_number_total              12437
_reflns_number_gt                 11068
_reflns_threshold_expression      'I > 2\s(I)'
_reflns_Friedel_coverage          0.596
_reflns_Friedel_fraction_max      0.675
_reflns_Friedel_fraction_full     0.700
 
_reflns_special_details
;
 Reflections were merged by SHELXL according to the crystal
 class for the calculation of statistics and refinement.
 
 Structure factors included contributions from the .fab file.
 
 _reflns_Friedel_fraction is defined as the number of unique
 Friedel pairs measured divided by the number that would be
 possible theoretically, ignoring centric projections and
 systematic absences.
;
 
_computing_data_collection
;
CrysAlisPro, Agilent Technologies,
Version 1.171.36.32 (release 02-08-2013 CrysAlis171 .NET)
(compiled Aug  2 2013,16:46:58)
;
_computing_cell_refinement
;
CrysAlisPro, Agilent Technologies,
Version 1.171.36.32 (release 02-08-2013 CrysAlis171 .NET)
(compiled Aug  2 2013,16:46:58)
;
_computing_data_reduction         
;
CrysAlisPro, Agilent Technologies,
Version 1.171.36.32 (release 02-08-2013 CrysAlis171 .NET)
(compiled Aug  2 2013,16:46:58)
;
_computing_structure_solution     'SHELXS-2014/7 (Sheldrick, 2015)'
_computing_structure_refinement   'SHELXL-2014/7 (Sheldrick, 2015)'
_computing_molecular_graphics     'SHELXTL v6.10 (Sheldrick, 2008)'
_computing_publication_material   'SHELXTL v6.10 (Sheldrick, 2008)'
_refine_special_details           ?
_refine_ls_structure_factor_coef  Fsqd
_refine_ls_matrix_type            full
_refine_ls_weighting_scheme       calc
_refine_ls_weighting_details
'w=1/[\s^2^(Fo^2^)+(0.0489P)^2^+1.6892P] where P=(Fo^2^+2Fc^2^)/3'
_atom_sites_solution_primary      direct
_atom_sites_solution_secondary    difmap
_atom_sites_solution_hydrogens    geom
_refine_ls_hydrogen_treatment     constr
_refine_ls_extinction_method      none
_refine_ls_extinction_coef        .
_refine_ls_abs_structure_details
;
 Flack x determined using 3706 quotients [(I+)-(I-)]/[(I+)+(I-)]
 (Parsons, Flack and Wagner, Acta Cryst. B69 (2013) 249-259).
;
_refine_ls_abs_structure_Flack    0.023(9)
_chemical_absolute_configuration  ad
_refine_ls_number_reflns          12437
_refine_ls_number_parameters      1149
_refine_ls_number_restraints      2854
_refine_ls_R_factor_all           0.0463
_refine_ls_R_factor_gt            0.0404
_refine_ls_wR_factor_ref          0.1084
_refine_ls_wR_factor_gt           0.1024
_refine_ls_goodness_of_fit_ref    1.028
_refine_ls_restrained_S_all       0.959
_refine_ls_shift/su_max           0.020
_refine_ls_shift/su_mean          0.000
 
loop_
 _atom_site_label
 _atom_site_type_symbol
 _atom_site_fract_x
 _atom_site_fract_y
 _atom_site_fract_z
 _atom_site_U_iso_or_equiv
 _atom_site_adp_type
 _atom_site_occupancy
 _atom_site_site_symmetry_order  
 _atom_site_calc_flag
 _atom_site_refinement_flags_posn
 _atom_site_refinement_flags_adp
 _atom_site_refinement_flags_occupancy
 _atom_site_disorder_assembly
 _atom_site_disorder_group
Cu1 Cu 0.66298(3) 0.68424(8) 0.09511(2) 0.03045(13) Uani 0.536(10) 1 d D U P A 1
C1A C 0.5701(13) 0.9458(15) 0.0355(6) 0.0281(18) Uani 0.536(10) 1 d D U P A 1
H1A H 0.5911 0.9268 0.0039 0.034 Uiso 0.536(10) 1 calc R U P A 1
C2A C 0.5301(12) 1.0709(15) 0.0361(5) 0.0278(18) Uani 0.536(10) 1 d D U P A 1
H2A H 0.5235 1.1348 0.0054 0.033 Uiso 0.536(10) 1 calc R U P A 1
C3A C 0.4999(12) 1.1012(16) 0.0823(5) 0.0285(18) Uani 0.536(10) 1 d D U P A 1
H3A H 0.4723 1.1860 0.0837 0.034 Uiso 0.536(10) 1 calc R U P A 1
C4A C 0.5109(12) 1.0060(17) 0.1258(5) 0.0291(16) Uani 0.536(10) 1 d D U P A 1
H4A H 0.4926 1.0250 0.1586 0.035 Uiso 0.536(10) 1 calc R U P A 1
C5A C 0.5494(12) 0.8801(17) 0.1212(6) 0.0265(15) Uani 0.536(10) 1 d D U P A 1
C6A C 0.5593(8) 0.7737(16) 0.1675(5) 0.0277(15) Uani 0.536(10) 1 d D U P A 1
H6A1 H 0.5786 0.8188 0.2059 0.033 Uiso 0.536(10) 1 calc R U P A 1
H6A2 H 0.5040 0.7311 0.1636 0.033 Uiso 0.536(10) 1 calc R U P A 1
C7A C 0.6316(19) 0.577(3) 0.2053(11) 0.0311(9) Uani 0.536(10) 1 d D U P A 1
C8A C 0.5861(11) 0.5768(14) 0.2518(7) 0.0367(14) Uani 0.536(10) 1 d D U P A 1
H8A1 H 0.5247 0.5644 0.2347 0.044 Uiso 0.536(10) 1 calc R U P A 1
H8A2 H 0.5972 0.6619 0.2754 0.044 Uiso 0.536(10) 1 calc R U P A 1
C9A C 0.6278(7) 0.4499(12) 0.2873(5) 0.0367(14) Uani 0.536(10) 1 d D U P A 1
H9A H 0.6212 0.4446 0.3269 0.044 Uiso 0.536(10) 1 calc R U P A 1
C10A C 0.7194(8) 0.4635(12) 0.2865(5) 0.0349(16) Uani 0.536(10) 1 d D U P A 1
C11A C 0.7643(14) 0.5928(16) 0.3142(10) 0.050(3) Uani 0.536(10) 1 d D U P A 1
H11A H 0.7302 0.6734 0.2977 0.074 Uiso 0.536(10) 1 calc R U P A 1
H11B H 0.8187 0.5990 0.3068 0.074 Uiso 0.536(10) 1 calc R U P A 1
H11C H 0.7730 0.5897 0.3561 0.074 Uiso 0.536(10) 1 calc R U P A 1
C12A C 0.7726(11) 0.3378(15) 0.3145(6) 0.046(3) Uani 0.536(10) 1 d D U P A 1
H12A H 0.8233 0.3337 0.3021 0.069 Uiso 0.536(10) 1 calc R U P A 1
H12B H 0.7396 0.2536 0.3024 0.069 Uiso 0.536(10) 1 calc R U P A 1
H12C H 0.7886 0.3462 0.3568 0.069 Uiso 0.536(10) 1 calc R U P A 1
C13A C 0.5944(8) 0.3226(13) 0.2488(5) 0.0372(17) Uani 0.536(10) 1 d D U P A 1
H13A H 0.5327 0.3275 0.2312 0.045 Uiso 0.536(10) 1 calc R U P A 1
H13B H 0.6088 0.2363 0.2714 0.045 Uiso 0.536(10) 1 calc R U P A 1
C14A C 0.6408(9) 0.3322(17) 0.2016(4) 0.0348(15) Uani 0.536(10) 1 d D U P A 1
H14A H 0.6763 0.2501 0.2025 0.042 Uiso 0.536(10) 1 calc R U P A 1
H14B H 0.6003 0.3415 0.1624 0.042 Uiso 0.536(10) 1 calc R U P A 1
C15A C 0.6955(10) 0.4641(16) 0.2190(6) 0.0313(13) Uani 0.536(10) 1 d D U P A 1
C16A C 0.7698(14) 0.474(4) 0.1951(12) 0.032(2) Uani 0.536(10) 1 d D U P A 1
H16A H 0.7497 0.4674 0.1527 0.048 Uiso 0.536(10) 1 calc R U P A 1
H16B H 0.8089 0.3982 0.2107 0.048 Uiso 0.536(10) 1 calc R U P A 1
H16C H 0.7985 0.5619 0.2065 0.048 Uiso 0.536(10) 1 calc R U P A 1
C17A C 0.6433(14) 0.4144(18) 0.0256(9) 0.0292(18) Uani 0.536(10) 1 d D U P A 1
H17A H 0.6019 0.3882 0.0433 0.035 Uiso 0.536(10) 1 calc R U P A 1
C18A C 0.6603(11) 0.3261(17) -0.0134(7) 0.0325(18) Uani 0.536(10) 1 d D U P A 1
H18A H 0.6237 0.2516 -0.0292 0.039 Uiso 0.536(10) 1 calc R U P A 1
C19A C 0.7347(7) 0.3491(14) -0.0298(5) 0.0352(17) Uani 0.536(10) 1 d D U P A 1
H19A H 0.7557 0.2813 -0.0501 0.042 Uiso 0.536(10) 1 calc R U P A 1
C20A C 0.7744(7) 0.4730(13) -0.0149(5) 0.0319(17) Uani 0.536(10) 1 d D U P A 1
H20A H 0.8210 0.4963 -0.0279 0.038 Uiso 0.536(10) 1 calc R U P A 1
C21A C 0.7459(18) 0.565(2) 0.0195(13) 0.0289(16) Uani 0.536(10) 1 d D U P A 1
C22A C 0.7917(10) 0.6983(17) 0.0360(7) 0.0291(16) Uani 0.536(10) 1 d D U P A 1
H22A H 0.8528 0.6814 0.0455 0.035 Uiso 0.536(10) 1 calc R U P A 1
H22B H 0.7753 0.7617 0.0024 0.035 Uiso 0.536(10) 1 calc R U P A 1
C23A C 0.8188(15) 0.872(2) 0.1024(10) 0.0378(11) Uani 0.536(10) 1 d D U P A 1
C24A C 0.8780(9) 0.9333(16) 0.0710(5) 0.0481(16) Uani 0.536(10) 1 d D U P A 1
H24A H 0.9248 0.8697 0.0721 0.058 Uiso 0.536(10) 1 calc R U P A 1
H24B H 0.8475 0.9558 0.0302 0.058 Uiso 0.536(10) 1 calc R U P A 1
C25A C 0.9094(8) 1.0629(14) 0.1065(5) 0.0500(18) Uani 0.536(10) 1 d D U P A 1
H25A H 0.9638 1.0993 0.1033 0.060 Uiso 0.536(10) 1 calc R U P A 1
C26A C 0.9123(8) 1.0153(15) 0.1690(5) 0.0456(19) Uani 0.536(10) 1 d D U P A 1
C27A C 0.9789(9) 0.9035(16) 0.1904(7) 0.063(3) Uani 0.536(10) 1 d D U P A 1
H27A H 0.9897 0.8902 0.2322 0.094 Uiso 0.536(10) 1 calc R U P A 1
H27B H 1.0310 0.9316 0.1828 0.094 Uiso 0.536(10) 1 calc R U P A 1
H27C H 0.9588 0.8171 0.1701 0.094 Uiso 0.536(10) 1 calc R U P A 1
C28A C 0.9318(14) 1.1305(17) 0.2133(6) 0.061(4) Uani 0.536(10) 1 d D U P A 1
H28A H 0.8872 1.1998 0.2024 0.091 Uiso 0.536(10) 1 calc R U P A 1
H28B H 0.9856 1.1731 0.2145 0.091 Uiso 0.536(10) 1 calc R U P A 1
H28C H 0.9354 1.0930 0.2515 0.091 Uiso 0.536(10) 1 calc R U P A 1
C29A C 0.8382(9) 1.1657(15) 0.0913(5) 0.057(2) Uani 0.536(10) 1 d D U P A 1
H29A H 0.8145 1.1766 0.0489 0.068 Uiso 0.536(10) 1 calc R U P A 1
H29B H 0.8569 1.2566 0.1090 0.068 Uiso 0.536(10) 1 calc R U P A 1
C30A C 0.7748(8) 1.1013(14) 0.1170(5) 0.049(2) Uani 0.536(10) 1 d D U P A 1
H30A H 0.7227 1.0773 0.0861 0.059 Uiso 0.536(10) 1 calc R U P A 1
H30B H 0.7605 1.1659 0.1443 0.059 Uiso 0.536(10) 1 calc R U P A 1
C31A C 0.8178(9) 0.9674(13) 0.1500(6) 0.0417(15) Uani 0.536(10) 1 d D U P A 1
C32A C 0.7743(10) 0.9186(14) 0.1924(7) 0.054(3) Uani 0.536(10) 1 d D U P A 1
H32A H 0.7157 0.8961 0.1717 0.081 Uiso 0.536(10) 1 calc R U P A 1
H32B H 0.7759 0.9914 0.2208 0.081 Uiso 0.536(10) 1 calc R U P A 1
H32C H 0.8028 0.8365 0.2125 0.081 Uiso 0.536(10) 1 calc R U P A 1
N1A N 0.5805(11) 0.8507(16) 0.0771(6) 0.0268(17) Uani 0.536(10) 1 d D U P A 1
N2A N 0.620(2) 0.665(3) 0.1646(12) 0.0284(8) Uani 0.536(10) 1 d D U P A 1
N3A N 0.6823(17) 0.537(2) 0.0405(13) 0.0250(14) Uani 0.536(10) 1 d D U P A 1
N4A N 0.7742(15) 0.764(3) 0.0858(13) 0.0284(9) Uani 0.536(10) 1 d D U P A 1
Cu1' Cu 0.66298(3) 0.68424(8) 0.09511(2) 0.03045(13) Uani 0.464(10) 1 d D U P A 2
C1C C 0.5662(16) 0.9286(18) 0.0250(7) 0.0281(18) Uani 0.464(10) 1 d D U P A 2
H1C H 0.5892 0.9045 -0.0051 0.034 Uiso 0.464(10) 1 calc R U P A 2
C2C C 0.5262(14) 1.0547(17) 0.0221(6) 0.0278(18) Uani 0.464(10) 1 d D U P A 2
H2C H 0.5196 1.1143 -0.0101 0.033 Uiso 0.464(10) 1 calc R U P A 2
C3C C 0.4964(14) 1.0908(19) 0.0672(6) 0.0285(18) Uani 0.464(10) 1 d D U P A 2
H3C H 0.4704 1.1778 0.0671 0.034 Uiso 0.464(10) 1 calc R U P A 2
C4C C 0.5042(14) 1.001(2) 0.1127(6) 0.0291(16) Uani 0.464(10) 1 d D U P A 2
H4C H 0.4837 1.0258 0.1439 0.035 Uiso 0.464(10) 1 calc R U P A 2
C5C C 0.5428(14) 0.874(2) 0.1121(7) 0.0265(15) Uani 0.464(10) 1 d D U P A 2
C6C C 0.5453(9) 0.7648(18) 0.1568(6) 0.0277(15) Uani 0.464(10) 1 d D U P A 2
H6C1 H 0.5507 0.8095 0.1945 0.033 Uiso 0.464(10) 1 calc R U P A 2
H6C2 H 0.4918 0.7129 0.1452 0.033 Uiso 0.464(10) 1 calc R U P A 2
C7C C 0.629(2) 0.576(3) 0.2038(13) 0.0311(9) Uani 0.464(10) 1 d D U P A 2
C8C C 0.5807(13) 0.5542(16) 0.2475(8) 0.0367(14) Uani 0.464(10) 1 d D U P A 2
H8C1 H 0.5195 0.5483 0.2279 0.044 Uiso 0.464(10) 1 calc R U P A 2
H8C2 H 0.5918 0.6294 0.2764 0.044 Uiso 0.464(10) 1 calc R U P A 2
C9C C 0.6163(8) 0.4141(13) 0.2763(5) 0.035(2) Uani 0.464(10) 1 d D U P A 2
H9C H 0.6074 0.3968 0.3148 0.042 Uiso 0.464(10) 1 calc R U P A 2
C10C C 0.7105(9) 0.4297(14) 0.2782(6) 0.0349(16) Uani 0.464(10) 1 d D U P A 2
C11C C 0.7579(16) 0.5491(19) 0.3131(11) 0.050(3) Uani 0.464(10) 1 d D U P A 2
H11D H 0.7464 0.5534 0.3505 0.074 Uiso 0.464(10) 1 calc R U P A 2
H11E H 0.7397 0.6351 0.2919 0.074 Uiso 0.464(10) 1 calc R U P A 2
H11F H 0.8183 0.5364 0.3197 0.074 Uiso 0.464(10) 1 calc R U P A 2
C12C C 0.7619(13) 0.2986(17) 0.3006(7) 0.046(3) Uani 0.464(10) 1 d D U P A 2
H12D H 0.8191 0.3102 0.2982 0.069 Uiso 0.464(10) 1 calc R U P A 2
H12E H 0.7353 0.2198 0.2769 0.069 Uiso 0.464(10) 1 calc R U P A 2
H12F H 0.7642 0.2824 0.3410 0.069 Uiso 0.464(10) 1 calc R U P A 2
C13C C 0.5825(9) 0.3027(16) 0.2313(5) 0.0372(17) Uani 0.464(10) 1 d D U P A 2
H13C H 0.5210 0.3117 0.2135 0.045 Uiso 0.464(10) 1 calc R U P A 2
H13D H 0.5953 0.2098 0.2485 0.045 Uiso 0.464(10) 1 calc R U P A 2
C14C C 0.6300(11) 0.330(2) 0.1865(5) 0.0348(15) Uani 0.464(10) 1 d D U P A 2
H14C H 0.5903 0.3535 0.1482 0.042 Uiso 0.464(10) 1 calc R U P A 2
H14D H 0.6634 0.2491 0.1823 0.042 Uiso 0.464(10) 1 calc R U P A 2
C15C C 0.6884(11) 0.4546(19) 0.2115(7) 0.0313(13) Uani 0.464(10) 1 d D U P A 2
C16C C 0.7614(17) 0.471(5) 0.1866(13) 0.032(2) Uani 0.464(10) 1 d D U P A 2
H16D H 0.8062 0.4063 0.2059 0.048 Uiso 0.464(10) 1 calc R U P A 2
H16E H 0.7828 0.5652 0.1930 0.048 Uiso 0.464(10) 1 calc R U P A 2
H16F H 0.7421 0.4514 0.1450 0.048 Uiso 0.464(10) 1 calc R U P A 2
C17C C 0.6499(16) 0.407(2) 0.0327(10) 0.0292(18) Uani 0.464(10) 1 d D U P A 2
H17C H 0.6095 0.3816 0.0513 0.035 Uiso 0.464(10) 1 calc R U P A 2
C18C C 0.6693(12) 0.314(2) -0.0043(8) 0.0325(18) Uani 0.464(10) 1 d D U P A 2
H18C H 0.6522 0.2209 -0.0057 0.039 Uiso 0.464(10) 1 calc R U P A 2
C19C C 0.7161(9) 0.3645(16) -0.0403(6) 0.0352(17) Uani 0.464(10) 1 d D U P A 2
H19C H 0.7192 0.3137 -0.0732 0.042 Uiso 0.464(10) 1 calc R U P A 2
C20C C 0.7571(9) 0.4891(16) -0.0263(6) 0.0319(17) Uani 0.464(10) 1 d D U P A 2
H20C H 0.7959 0.5185 -0.0456 0.038 Uiso 0.464(10) 1 calc R U P A 2
C21C C 0.741(2) 0.572(3) 0.0166(15) 0.0289(16) Uani 0.464(10) 1 d D U P A 2
C22C C 0.7818(12) 0.711(2) 0.0301(8) 0.0291(16) Uani 0.464(10) 1 d D U P A 2
H22C H 0.8421 0.7032 0.0334 0.035 Uiso 0.464(10) 1 calc R U P A 2
H22D H 0.7557 0.7749 -0.0022 0.035 Uiso 0.464(10) 1 calc R U P A 2
C23C C 0.8194(17) 0.872(3) 0.1070(11) 0.0378(11) Uani 0.464(10) 1 d D U P A 2
C24C C 0.8891(10) 0.9383(19) 0.0858(6) 0.0481(16) Uani 0.464(10) 1 d D U P A 2
H24C H 0.9380 0.8763 0.0918 0.058 Uiso 0.464(10) 1 calc R U P A 2
H24D H 0.8679 0.9643 0.0444 0.058 Uiso 0.464(10) 1 calc R U P A 2
C25C C 0.9111(10) 1.0653(16) 0.1250(6) 0.0500(18) Uani 0.464(10) 1 d D U P A 2
H25C H 0.9643 1.1128 0.1253 0.060 Uiso 0.464(10) 1 calc R U P A 2
C26C C 0.9105(10) 1.0043(17) 0.1838(6) 0.0456(19) Uani 0.464(10) 1 d D U P A 2
C27C C 0.9636(11) 0.8790(19) 0.2089(8) 0.063(3) Uani 0.464(10) 1 d D U P A 2
H27D H 0.9442 0.7999 0.1833 0.094 Uiso 0.464(10) 1 calc R U P A 2
H27E H 0.9583 0.8585 0.2473 0.094 Uiso 0.464(10) 1 calc R U P A 2
H27F H 1.0226 0.8980 0.2123 0.094 Uiso 0.464(10) 1 calc R U P A 2
C28C C 0.9271(18) 1.112(2) 0.2315(7) 0.061(4) Uani 0.464(10) 1 d D U P A 2
H28D H 0.9855 1.1436 0.2409 0.091 Uiso 0.464(10) 1 calc R U P A 2
H28E H 0.9175 1.0718 0.2660 0.091 Uiso 0.464(10) 1 calc R U P A 2
H28F H 0.8892 1.1903 0.2182 0.091 Uiso 0.464(10) 1 calc R U P A 2
C29C C 0.8305(10) 1.1611(17) 0.1103(6) 0.057(2) Uani 0.464(10) 1 d D U P A 2
H29C H 0.8445 1.2532 0.1280 0.068 Uiso 0.464(10) 1 calc R U P A 2
H29D H 0.8053 1.1717 0.0679 0.068 Uiso 0.464(10) 1 calc R U P A 2
C30C C 0.7722(10) 1.0848(16) 0.1365(6) 0.049(2) Uani 0.464(10) 1 d D U P A 2
H30C H 0.7178 1.0660 0.1068 0.059 Uiso 0.464(10) 1 calc R U P A 2
H30D H 0.7616 1.1389 0.1682 0.059 Uiso 0.464(10) 1 calc R U P A 2
C31C C 0.8179(10) 0.9490(16) 0.1599(7) 0.0417(15) Uani 0.464(10) 1 d D U P A 2
C32C C 0.7891(13) 0.8761(17) 0.2045(8) 0.054(3) Uani 0.464(10) 1 d D U P A 2
H32D H 0.7287 0.8580 0.1892 0.081 Uiso 0.464(10) 1 calc R U P A 2
H32E H 0.8002 0.9334 0.2393 0.081 Uiso 0.464(10) 1 calc R U P A 2
H32F H 0.8194 0.7887 0.2143 0.081 Uiso 0.464(10) 1 calc R U P A 2
N1C N 0.5739(13) 0.8392(19) 0.0685(7) 0.0268(17) Uani 0.464(10) 1 d D U P A 2
N2C N 0.617(2) 0.667(3) 0.1636(13) 0.0284(8) Uani 0.464(10) 1 d D U P A 2
N3C N 0.686(2) 0.532(2) 0.0437(15) 0.0250(14) Uani 0.464(10) 1 d D U P A 2
N4C N 0.7729(17) 0.769(3) 0.0846(15) 0.0284(9) Uani 0.464(10) 1 d D U P A 2
Cu2 Cu 0.6777(10) 0.684(2) 0.6021(7) 0.0331(6) Uani 0.353(10) 1 d D U P B 1
C1B C 0.573(2) 0.916(3) 0.5297(11) 0.0382(17) Uani 0.353(10) 1 d D U P B 1
H1B H 0.5910 0.8838 0.4982 0.046 Uiso 0.353(10) 1 calc R U P B 1
C2B C 0.533(2) 1.043(3) 0.5259(10) 0.041(2) Uani 0.353(10) 1 d D U P B 1
H2B H 0.5206 1.0949 0.4912 0.049 Uiso 0.353(10) 1 calc R U P B 1
C3B C 0.5115(17) 1.091(3) 0.5721(10) 0.041(2) Uani 0.353(10) 1 d D U P B 1
H3B H 0.4860 1.1789 0.5702 0.049 Uiso 0.353(10) 1 calc R U P B 1
C4B C 0.527(2) 1.012(3) 0.6225(12) 0.0400(18) Uani 0.353(10) 1 d D U P B 1
H4B H 0.5126 1.0451 0.6553 0.048 Uiso 0.353(10) 1 calc R U P B 1
C5B C 0.563(3) 0.882(4) 0.6233(15) 0.0371(15) Uani 0.353(10) 1 d D U P B 1
C6B C 0.5801(14) 0.789(2) 0.6750(10) 0.0341(16) Uani 0.353(10) 1 d D U P B 1
H6B1 H 0.6008 0.8445 0.7107 0.041 Uiso 0.353(10) 1 calc R U P B 1
H6B2 H 0.5269 0.7446 0.6754 0.041 Uiso 0.353(10) 1 calc R U P B 1
C7B C 0.6576(12) 0.5937(19) 0.7164(8) 0.0333(15) Uani 0.353(10) 1 d D U P B 1
C8B C 0.6176(10) 0.5926(16) 0.7651(7) 0.0388(13) Uani 0.353(10) 1 d D U P B 1
H8B1 H 0.5558 0.5819 0.7499 0.047 Uiso 0.353(10) 1 calc R U P B 1
H8B2 H 0.6310 0.6775 0.7887 0.047 Uiso 0.353(10) 1 calc R U P B 1
C9B C 0.6590(8) 0.4655(17) 0.8001(6) 0.0388(13) Uani 0.353(10) 1 d D U P B 1
H9B H 0.6556 0.4631 0.8406 0.047 Uiso 0.353(10) 1 calc R U P B 1
C10B C 0.7495(9) 0.4798(18) 0.7960(7) 0.0439(15) Uani 0.353(10) 1 d D U P B 1
C11B C 0.7950(13) 0.613(2) 0.8195(10) 0.057(2) Uani 0.353(10) 1 d D U P B 1
H11G H 0.8017 0.6199 0.8611 0.085 Uiso 0.353(10) 1 calc R U P B 1
H11H H 0.7622 0.6914 0.7993 0.085 Uiso 0.353(10) 1 calc R U P B 1
H11I H 0.8504 0.6132 0.8134 0.085 Uiso 0.353(10) 1 calc R U P B 1
C12B C 0.8060(11) 0.359(2) 0.8241(8) 0.062(2) Uani 0.353(10) 1 d D U P B 1
H12G H 0.8571 0.3599 0.8121 0.093 Uiso 0.353(10) 1 calc R U P B 1
H12H H 0.7759 0.2721 0.8118 0.093 Uiso 0.353(10) 1 calc R U P B 1
H12I H 0.8212 0.3668 0.8664 0.093 Uiso 0.353(10) 1 calc R U P B 1
C13B C 0.6232(10) 0.3383(17) 0.7644(7) 0.0442(16) Uani 0.353(10) 1 d D U P B 1
H13E H 0.5613 0.3435 0.7484 0.053 Uiso 0.353(10) 1 calc R U P B 1
H13F H 0.6387 0.2531 0.7876 0.053 Uiso 0.353(10) 1 calc R U P B 1
C14B C 0.6666(10) 0.3453(18) 0.7151(7) 0.0409(14) Uani 0.353(10) 1 d D U P B 1
H14E H 0.7021 0.2632 0.7162 0.049 Uiso 0.353(10) 1 calc R U P B 1
H14F H 0.6240 0.3506 0.6765 0.049 Uiso 0.353(10) 1 calc R U P B 1
C15B C 0.7205(10) 0.4771(18) 0.7277(7) 0.0355(14) Uani 0.353(10) 1 d D U P B 1
C16B C 0.7901(16) 0.487(3) 0.6995(13) 0.033(2) Uani 0.353(10) 1 d D U P B 1
H16G H 0.7656 0.4864 0.6573 0.049 Uiso 0.353(10) 1 calc R U P B 1
H16H H 0.8282 0.4086 0.7115 0.049 Uiso 0.353(10) 1 calc R U P B 1
H16I H 0.8214 0.5729 0.7115 0.049 Uiso 0.353(10) 1 calc R U P B 1
C17B C 0.6337(19) 0.416(3) 0.5327(15) 0.0326(16) Uani 0.353(10) 1 d D U P B 1
H17B H 0.5948 0.3979 0.5535 0.039 Uiso 0.353(10) 1 calc R U P B 1
C18B C 0.6392(15) 0.325(3) 0.4908(14) 0.0356(18) Uani 0.353(10) 1 d D U P B 1
H18B H 0.6088 0.2407 0.4850 0.043 Uiso 0.353(10) 1 calc R U P B 1
C19B C 0.6901(12) 0.358(3) 0.4571(12) 0.0376(17) Uani 0.353(10) 1 d D U P B 1
H19B H 0.6957 0.2966 0.4280 0.045 Uiso 0.353(10) 1 calc R U P B 1
C20B C 0.7327(11) 0.482(2) 0.4658(9) 0.0347(15) Uani 0.353(10) 1 d D U P B 1
H20B H 0.7648 0.5086 0.4412 0.042 Uiso 0.353(10) 1 calc R U P B 1
C21B C 0.728(2) 0.566(3) 0.5112(15) 0.0321(14) Uani 0.353(10) 1 d D U P B 1
C22B C 0.7866(15) 0.688(2) 0.5276(10) 0.0360(17) Uani 0.353(10) 1 d D U P B 1
H22E H 0.8452 0.6556 0.5357 0.043 Uiso 0.353(10) 1 calc R U P B 1
H22F H 0.7748 0.7523 0.4944 0.043 Uiso 0.353(10) 1 calc R U P B 1
C23B C 0.821(2) 0.873(3) 0.5908(14) 0.0424(11) Uani 0.353(10) 1 d D U P B 1
C24B C 0.8822(15) 0.923(2) 0.5578(11) 0.0549(19) Uani 0.353(10) 1 d D U P B 1
H24E H 0.9286 0.8571 0.5610 0.066 Uiso 0.353(10) 1 calc R U P B 1
H24F H 0.8528 0.9418 0.5164 0.066 Uiso 0.353(10) 1 calc R U P B 1
C25B C 0.9131(13) 1.056(2) 0.5920(10) 0.0621(19) Uani 0.353(10) 1 d D U P B 1
H25B H 0.9668 1.0913 0.5871 0.074 Uiso 0.353(10) 1 calc R U P B 1
C26B C 0.9208(14) 1.016(3) 0.6539(10) 0.0603(14) Uani 0.353(10) 1 d D U P B 1
C27B C 0.981(3) 0.900(4) 0.6802(19) 0.077(4) Uani 0.353(10) 1 d D U P B 1
H27G H 0.9706 0.8222 0.6531 0.115 Uiso 0.353(10) 1 calc R U P B 1
H27H H 0.9712 0.8700 0.7165 0.115 Uiso 0.353(10) 1 calc R U P B 1
H27I H 1.0386 0.9317 0.6882 0.115 Uiso 0.353(10) 1 calc R U P B 1
C28B C 0.945(3) 1.142(3) 0.6941(12) 0.075(4) Uani 0.353(10) 1 d D U P B 1
H28G H 1.0064 1.1484 0.7093 0.112 Uiso 0.353(10) 1 calc R U P B 1
H28H H 0.9215 1.1320 0.7264 0.112 Uiso 0.353(10) 1 calc R U P B 1
H28I H 0.9228 1.2256 0.6723 0.112 Uiso 0.353(10) 1 calc R U P B 1
C29B C 0.8417(13) 1.163(2) 0.5760(10) 0.069(2) Uani 0.353(10) 1 d D U P B 1
H29E H 0.8620 1.2549 0.5915 0.083 Uiso 0.353(10) 1 calc R U P B 1
H29F H 0.8159 1.1690 0.5335 0.083 Uiso 0.353(10) 1 calc R U P B 1
C30B C 0.7822(12) 1.107(2) 0.6042(10) 0.067(2) Uani 0.353(10) 1 d D U P B 1
H30E H 0.7287 1.0814 0.5750 0.081 Uiso 0.353(10) 1 calc R U P B 1
H30F H 0.7704 1.1753 0.6310 0.081 Uiso 0.353(10) 1 calc R U P B 1
C31B C 0.8270(14) 0.973(2) 0.6392(9) 0.0547(15) Uani 0.353(10) 1 d D U P B 1
C32B C 0.7942(18) 0.919(3) 0.6841(11) 0.073(3) Uani 0.353(10) 1 d D U P B 1
H32G H 0.7365 0.8872 0.6666 0.109 Uiso 0.353(10) 1 calc R U P B 1
H32H H 0.7947 0.9924 0.7122 0.109 Uiso 0.353(10) 1 calc R U P B 1
H32I H 0.8293 0.8427 0.7039 0.109 Uiso 0.353(10) 1 calc R U P B 1
N1B N 0.588(3) 0.840(4) 0.5782(14) 0.0371(11) Uani 0.353(10) 1 d D U P B 1
N2B N 0.6431(15) 0.680(2) 0.6750(8) 0.0310(16) Uani 0.353(10) 1 d D U P B 1
N3B N 0.682(3) 0.531(3) 0.5456(17) 0.0295(10) Uani 0.353(10) 1 d D U P B 1
N4B N 0.779(2) 0.763(4) 0.5786(17) 0.0329(10) Uani 0.353(10) 1 d D U P B 1
Cu2' Cu 0.6685(5) 0.6787(10) 0.5983(3) 0.0331(6) Uani 0.647(10) 1 d D U P B 2
C1D C 0.5675(12) 0.9348(15) 0.5366(6) 0.0382(17) Uani 0.647(10) 1 d D U P B 2
H1D H 0.5856 0.9143 0.5039 0.046 Uiso 0.647(10) 1 calc R U P B 2
C2D C 0.5275(10) 1.0599(13) 0.5375(5) 0.041(2) Uani 0.647(10) 1 d D U P B 2
H2D H 0.5161 1.1205 0.5052 0.049 Uiso 0.647(10) 1 calc R U P B 2
C3D C 0.5049(8) 1.0945(13) 0.5855(5) 0.041(2) Uani 0.647(10) 1 d D U P B 2
H3D H 0.4787 1.1804 0.5877 0.049 Uiso 0.647(10) 1 calc R U P B 2
C4D C 0.5211(12) 1.0005(14) 0.6313(6) 0.0400(18) Uani 0.647(10) 1 d D U P B 2
H4D H 0.5069 1.0220 0.6654 0.048 Uiso 0.647(10) 1 calc R U P B 2
C5D C 0.5587(18) 0.8741(19) 0.6262(8) 0.0371(15) Uani 0.647(10) 1 d D U P B 2
C6D C 0.5676(7) 0.7660(10) 0.6718(5) 0.0341(16) Uani 0.647(10) 1 d D U P B 2
H6D1 H 0.5828 0.8105 0.7103 0.041 Uiso 0.647(10) 1 calc R U P B 2
H6D2 H 0.5130 0.7190 0.6656 0.041 Uiso 0.647(10) 1 calc R U P B 2
C7D C 0.6462(6) 0.5705(9) 0.7109(4) 0.0333(15) Uani 0.647(10) 1 d D U P B 2
C8D C 0.6015(5) 0.5569(8) 0.7566(4) 0.0388(13) Uani 0.647(10) 1 d D U P B 2
H8D1 H 0.5399 0.5493 0.7389 0.047 Uiso 0.647(10) 1 calc R U P B 2
H8D2 H 0.6142 0.6353 0.7839 0.047 Uiso 0.647(10) 1 calc R U P B 2
C9D C 0.6402(5) 0.4197(10) 0.7868(4) 0.0434(17) Uani 0.647(10) 1 d D U P B 2
H9D H 0.6339 0.4060 0.8263 0.052 Uiso 0.647(10) 1 calc R U P B 2
C10D C 0.7324(5) 0.4337(10) 0.7861(3) 0.0439(15) Uani 0.647(10) 1 d D U P B 2
C11D C 0.7804(7) 0.5556(12) 0.8191(5) 0.057(2) Uani 0.647(10) 1 d D U P B 2
H11J H 0.7776 0.5541 0.8590 0.085 Uiso 0.647(10) 1 calc R U P B 2
H11K H 0.7553 0.6411 0.8001 0.085 Uiso 0.647(10) 1 calc R U P B 2
H11L H 0.8391 0.5503 0.8195 0.085 Uiso 0.647(10) 1 calc R U P B 2
C12D C 0.7837(6) 0.3024(11) 0.8086(4) 0.062(2) Uani 0.647(10) 1 d D U P B 2
H12J H 0.8398 0.3115 0.8039 0.093 Uiso 0.647(10) 1 calc R U P B 2
H12K H 0.7551 0.2227 0.7865 0.093 Uiso 0.647(10) 1 calc R U P B 2
H12L H 0.7890 0.2895 0.8497 0.093 Uiso 0.647(10) 1 calc R U P B 2
C13D C 0.6043(5) 0.3029(9) 0.7443(4) 0.0442(16) Uani 0.647(10) 1 d D U P B 2
H13G H 0.5426 0.3108 0.7279 0.053 Uiso 0.647(10) 1 calc R U P B 2
H13H H 0.6184 0.2120 0.7631 0.053 Uiso 0.647(10) 1 calc R U P B 2
C14D C 0.6485(5) 0.3248(10) 0.6970(4) 0.0409(14) Uani 0.647(10) 1 d D U P B 2
H14G H 0.6069 0.3443 0.6590 0.049 Uiso 0.647(10) 1 calc R U P B 2
H14H H 0.6815 0.2427 0.6934 0.049 Uiso 0.647(10) 1 calc R U P B 2
C15D C 0.7070(5) 0.4514(9) 0.7189(3) 0.0355(14) Uani 0.647(10) 1 d D U P B 2
C16D C 0.7775(8) 0.4624(16) 0.6923(6) 0.033(2) Uani 0.647(10) 1 d D U P B 2
H16J H 0.7544 0.4592 0.6500 0.049 Uiso 0.647(10) 1 calc R U P B 2
H16K H 0.8166 0.3856 0.7056 0.049 Uiso 0.647(10) 1 calc R U P B 2
H16L H 0.8073 0.5496 0.7039 0.049 Uiso 0.647(10) 1 calc R U P B 2
C17D C 0.6452(9) 0.4050(14) 0.5305(8) 0.0326(16) Uani 0.647(10) 1 d D U P B 2
H17D H 0.6113 0.3743 0.5533 0.039 Uiso 0.647(10) 1 calc R U P B 2
C18D C 0.6557(7) 0.3182(15) 0.4884(7) 0.0356(18) Uani 0.647(10) 1 d D U P B 2
H18D H 0.6254 0.2342 0.4801 0.043 Uiso 0.647(10) 1 calc R U P B 2
C19D C 0.7112(5) 0.3547(13) 0.4583(6) 0.0376(17) Uani 0.647(10) 1 d D U P B 2
H19D H 0.7193 0.2972 0.4287 0.045 Uiso 0.647(10) 1 calc R U P B 2
C20D C 0.7538(5) 0.4764(12) 0.4725(4) 0.0347(15) Uani 0.647(10) 1 d D U P B 2
H20D H 0.7951 0.5017 0.4546 0.042 Uiso 0.647(10) 1 calc R U P B 2
C21D C 0.7364(12) 0.5630(18) 0.5135(8) 0.0321(14) Uani 0.647(10) 1 d D U P B 2
C22D C 0.7742(7) 0.7057(11) 0.5231(5) 0.0360(17) Uani 0.647(10) 1 d D U P B 2
H22G H 0.8330 0.7016 0.5221 0.043 Uiso 0.647(10) 1 calc R U P B 2
H22H H 0.7424 0.7669 0.4914 0.043 Uiso 0.647(10) 1 calc R U P B 2
C23D C 0.8186(13) 0.8696(17) 0.5951(8) 0.0424(11) Uani 0.647(10) 1 d D U P B 2
C24D C 0.8673(7) 0.9454(12) 0.5586(6) 0.0549(19) Uani 0.647(10) 1 d D U P B 2
H24G H 0.8298 0.9732 0.5202 0.066 Uiso 0.647(10) 1 calc R U P B 2
H24H H 0.9140 0.8889 0.5536 0.066 Uiso 0.647(10) 1 calc R U P B 2
C25D C 0.9000(7) 1.0717(12) 0.5985(6) 0.0621(19) Uani 0.647(10) 1 d D U P B 2
H25D H 0.9482 1.1204 0.5907 0.074 Uiso 0.647(10) 1 calc R U P B 2
C26D C 0.9206(8) 1.0100(15) 0.6586(6) 0.0603(14) Uani 0.647(10) 1 d D U P B 2
C27D C 0.9874(13) 0.899(2) 0.6694(10) 0.077(4) Uani 0.647(10) 1 d D U P B 2
H27J H 0.9643 0.8175 0.6462 0.115 Uiso 0.647(10) 1 calc R U P B 2
H27K H 1.0053 0.8742 0.7106 0.115 Uiso 0.647(10) 1 calc R U P B 2
H27L H 1.0358 0.9332 0.6585 0.115 Uiso 0.647(10) 1 calc R U P B 2
C28D C 0.9449(14) 1.1173(15) 0.7078(6) 0.075(4) Uani 0.647(10) 1 d D U P B 2
H28J H 0.9500 1.0719 0.7449 0.112 Uiso 0.647(10) 1 calc R U P B 2
H28K H 0.9014 1.1885 0.7007 0.112 Uiso 0.647(10) 1 calc R U P B 2
H28L H 0.9987 1.1595 0.7091 0.112 Uiso 0.647(10) 1 calc R U P B 2
C29D C 0.8229(7) 1.1634(12) 0.5926(5) 0.069(2) Uani 0.647(10) 1 d D U P B 2
H29G H 0.8396 1.2559 0.6092 0.083 Uiso 0.647(10) 1 calc R U P B 2
H29H H 0.7887 1.1731 0.5515 0.083 Uiso 0.647(10) 1 calc R U P B 2
C30D C 0.7763(6) 1.0857(11) 0.6267(5) 0.067(2) Uani 0.647(10) 1 d D U P B 2
H30G H 0.7193 1.0608 0.6019 0.081 Uiso 0.647(10) 1 calc R U P B 2
H30H H 0.7712 1.1415 0.6597 0.081 Uiso 0.647(10) 1 calc R U P B 2
C31D C 0.8306(7) 0.9517(11) 0.6491(5) 0.0547(15) Uani 0.647(10) 1 d D U P B 2
C32D C 0.8122(9) 0.8836(16) 0.6980(6) 0.073(3) Uani 0.647(10) 1 d D U P B 2
H32J H 0.7521 0.8627 0.6876 0.109 Uiso 0.647(10) 1 calc R U P B 2
H32K H 0.8277 0.9447 0.7318 0.109 Uiso 0.647(10) 1 calc R U P B 2
H32L H 0.8445 0.7981 0.7073 0.109 Uiso 0.647(10) 1 calc R U P B 2
N1D N 0.5822(16) 0.841(2) 0.5795(8) 0.0371(11) Uani 0.647(10) 1 d D U P B 2
N2D N 0.6329(8) 0.6618(11) 0.6709(4) 0.0310(16) Uani 0.647(10) 1 d D U P B 2
N3D N 0.6803(15) 0.5320(16) 0.5415(9) 0.0295(10) Uani 0.647(10) 1 d D U P B 2
N4D N 0.7726(13) 0.763(2) 0.5792(9) 0.0329(10) Uani 0.647(10) 1 d D U P B 2
P1 P 0.64343(7) 0.95508(15) 0.37562(5) 0.0444(3) Uani 1 1 d . . . . .
F1 F 0.6057(3) 0.9236(4) 0.30885(13) 0.0854(11) Uani 1 1 d . . . . .
F2 F 0.7332(2) 0.9599(7) 0.3697(2) 0.1252(19) Uani 1 1 d . . . . .
F3 F 0.6819(2) 0.9895(3) 0.44353(12) 0.0648(8) Uani 1 1 d . . . . .
F4 F 0.5523(2) 0.9527(6) 0.38365(17) 0.0963(12) Uani 1 1 d . . . . .
F5 F 0.6313(3) 1.1138(4) 0.36218(14) 0.0954(14) Uani 1 1 d . . . . .
F6 F 0.6512(3) 0.7969(4) 0.38936(17) 0.0953(13) Uani 1 1 d . . . . .
P2 P 0.6780(9) 0.9533(17) 0.8888(8) 0.048(3) Uani 0.271(8) 1 d D U P C 1
F7 F 0.6469(15) 0.913(3) 0.8225(9) 0.068(6) Uani 0.271(8) 1 d D U P C 1
F8 F 0.7187(16) 0.995(3) 0.9558(9) 0.060(6) Uani 0.271(8) 1 d D U P C 1
F9 F 0.7245(10) 1.0838(13) 0.8739(5) 0.070(4) Uani 0.271(8) 1 d D U P C 1
F10 F 0.5972(9) 1.0433(17) 0.8852(6) 0.081(4) Uani 0.271(8) 1 d D U P C 1
F11 F 0.7598(8) 0.8671(16) 0.8954(6) 0.066(3) Uani 0.271(8) 1 d D U P C 1
F12 F 0.6372(11) 0.8205(18) 0.9068(8) 0.073(4) Uani 0.271(8) 1 d D U P C 1
P2' P 0.6630(3) 0.9560(5) 0.8829(2) 0.0358(7) Uani 0.729(8) 1 d D U P C 2
F7' F 0.6250(5) 0.9295(10) 0.8149(3) 0.0546(17) Uani 0.729(8) 1 d D U P C 2
F8' F 0.6969(6) 0.9861(11) 0.9512(3) 0.0483(17) Uani 0.729(8) 1 d D U P C 2
F9' F 0.6555(4) 1.1168(4) 0.86997(18) 0.0685(16) Uani 0.729(8) 1 d D U P C 2
F10' F 0.5695(3) 0.9563(7) 0.8879(2) 0.0689(15) Uani 0.729(8) 1 d D U P C 2
F11' F 0.7545(3) 0.9563(8) 0.8789(2) 0.0747(17) Uani 0.729(8) 1 d D U P C 2
F12' F 0.6674(5) 0.7951(6) 0.8959(3) 0.0699(18) Uani 0.729(8) 1 d D U P C 2
C1S C 0.9782(7) 0.2620(12) 1.0036(5) 0.192(7) Uani 1 1 d . . . . .
H1S1 H 1.0360 0.2347 1.0240 0.289 Uiso 1 1 calc R U . . .
H1S2 H 0.9452 0.2642 1.0309 0.289 Uiso 1 1 calc R U . . .
H1S3 H 0.9782 0.3536 0.9867 0.289 Uiso 1 1 calc R U . . .
C2S C 0.9407(4) 0.1617(9) 0.9570(3) 0.089(2) Uani 1 1 d . . . . .
H2S1 H 0.9231 0.0782 0.9738 0.107 Uiso 1 1 calc R U . . .
H2S2 H 0.8903 0.2023 0.9289 0.107 Uiso 1 1 calc R U . . .
O1S O 0.9989(2) 0.1268(5) 0.9289(2) 0.0841(13) Uani 1 1 d . . . . .
C3S C 0.9672(4) 0.0339(7) 0.8820(3) 0.0760(17) Uani 1 1 d . . . . .
H3S1 H 0.9230 0.0792 0.8505 0.091 Uiso 1 1 calc R U . . .
H3S2 H 0.9425 -0.0479 0.8951 0.091 Uiso 1 1 calc R U . . .
C4S C 1.0380(5) -0.0074(8) 0.8610(3) 0.106(3) Uani 1 1 d . . . . .
H4S1 H 1.0617 0.0743 0.8480 0.159 Uiso 1 1 calc R U . . .
H4S2 H 1.0181 -0.0719 0.8287 0.159 Uiso 1 1 calc R U . . .
H4S3 H 1.0814 -0.0519 0.8926 0.159 Uiso 1 1 calc R U . . .
 
loop_
 _atom_site_aniso_label
 _atom_site_aniso_U_11
 _atom_site_aniso_U_22
 _atom_site_aniso_U_33
 _atom_site_aniso_U_23
 _atom_site_aniso_U_13
 _atom_site_aniso_U_12
Cu1 0.0302(2) 0.0295(3) 0.0365(3) -0.0008(3) 0.01719(19) 0.0009(3)
C1A 0.027(2) 0.029(3) 0.027(4) -0.004(3) 0.004(3) -0.005(3)
C2A 0.028(2) 0.026(3) 0.025(5) -0.003(3) 0.001(4) -0.006(2)
C3A 0.029(2) 0.025(3) 0.028(5) -0.008(4) 0.002(4) -0.002(2)
C4A 0.028(3) 0.028(2) 0.029(5) -0.008(3) 0.004(4) -0.0001(19)
C5A 0.023(3) 0.027(2) 0.029(4) -0.005(3) 0.006(3) -0.0028(19)
C6A 0.024(3) 0.029(2) 0.032(4) -0.003(3) 0.010(3) 0.003(2)
C7A 0.0284(19) 0.0344(19) 0.0336(18) 0.0015(16) 0.0139(16) 0.0003(15)
C8A 0.035(2) 0.043(3) 0.039(2) 0.007(2) 0.0195(18) 0.005(2)
C9A 0.035(2) 0.043(3) 0.039(2) 0.007(2) 0.0195(18) 0.005(2)
C10A 0.030(2) 0.045(4) 0.032(3) 0.008(3) 0.013(2) 0.007(3)
C11A 0.048(4) 0.064(9) 0.036(2) 0.002(6) 0.013(2) 0.000(6)
C12A 0.043(4) 0.062(7) 0.036(6) 0.015(5) 0.017(4) 0.022(5)
C13A 0.032(3) 0.040(3) 0.040(4) 0.009(3) 0.012(3) -0.001(2)
C14A 0.033(3) 0.037(2) 0.033(4) 0.010(4) 0.007(3) 0.001(2)
C15A 0.027(2) 0.039(2) 0.031(3) 0.008(2) 0.014(2) 0.0033(19)
C16A 0.025(4) 0.041(3) 0.031(6) 0.007(4) 0.012(4) 0.007(3)
C17A 0.027(3) 0.028(2) 0.029(4) 0.005(2) 0.003(3) 0.001(2)
C18A 0.038(3) 0.028(3) 0.026(4) 0.003(3) 0.001(3) 0.001(2)
C19A 0.041(4) 0.033(3) 0.029(4) 0.004(3) 0.006(3) 0.010(3)
C20A 0.034(4) 0.036(3) 0.027(4) 0.003(3) 0.011(3) 0.007(3)
C21A 0.030(3) 0.029(2) 0.028(3) 0.003(2) 0.009(2) 0.003(2)
C22A 0.026(3) 0.029(3) 0.035(3) 0.001(2) 0.013(2) 0.001(2)
C23A 0.0255(16) 0.0321(19) 0.051(3) -0.002(2) 0.0049(19) -0.0001(14)
C24A 0.043(3) 0.045(3) 0.055(4) -0.007(3) 0.013(3) -0.015(2)
C25A 0.047(2) 0.044(2) 0.061(4) -0.007(4) 0.020(3) -0.015(2)
C26A 0.037(2) 0.037(3) 0.057(4) -0.008(3) 0.005(3) -0.007(2)
C27A 0.054(5) 0.049(6) 0.067(8) -0.004(5) -0.009(4) 0.006(4)
C28A 0.061(4) 0.039(5) 0.070(8) -0.010(6) 0.001(6) -0.013(4)
C29A 0.065(3) 0.037(3) 0.064(5) 0.005(4) 0.012(4) -0.003(3)
C30A 0.042(2) 0.036(3) 0.066(5) -0.004(4) 0.012(4) 0.004(2)
C31A 0.0365(18) 0.030(3) 0.057(3) -0.006(3) 0.011(2) -0.008(2)
C32A 0.075(6) 0.031(7) 0.057(6) -0.009(5) 0.022(5) -0.013(5)
N1A 0.022(2) 0.027(3) 0.028(4) -0.002(3) 0.003(3) -0.004(2)
N2A 0.025(2) 0.0285(18) 0.0341(14) 0.0011(13) 0.0125(15) 0.0032(13)
N3A 0.022(2) 0.0273(18) 0.025(3) 0.0016(18) 0.005(2) 0.0009(16)
N4A 0.0230(14) 0.0259(18) 0.0350(16) -0.0006(15) 0.0068(12) -0.0009(13)
Cu1' 0.0302(2) 0.0295(3) 0.0365(3) -0.0008(3) 0.01719(19) 0.0009(3)
C1C 0.027(2) 0.029(3) 0.027(4) -0.004(3) 0.004(3) -0.005(3)
C2C 0.028(2) 0.026(3) 0.025(5) -0.003(3) 0.001(4) -0.006(2)
C3C 0.029(2) 0.025(3) 0.028(5) -0.008(4) 0.002(4) -0.002(2)
C4C 0.028(3) 0.028(2) 0.029(5) -0.008(3) 0.004(4) -0.0001(19)
C5C 0.023(3) 0.027(2) 0.029(4) -0.005(3) 0.006(3) -0.0028(19)
C6C 0.024(3) 0.029(2) 0.032(4) -0.003(3) 0.010(3) 0.003(2)
C7C 0.0284(19) 0.0344(19) 0.0336(18) 0.0015(16) 0.0139(16) 0.0003(15)
C8C 0.035(2) 0.043(3) 0.039(2) 0.007(2) 0.0195(18) 0.005(2)
C9C 0.034(4) 0.044(5) 0.030(4) 0.009(4) 0.017(3) 0.003(4)
C10C 0.030(2) 0.045(4) 0.032(3) 0.008(3) 0.013(2) 0.007(3)
C11C 0.048(4) 0.064(9) 0.036(2) 0.002(6) 0.013(2) 0.000(6)
C12C 0.043(4) 0.062(7) 0.036(6) 0.015(5) 0.017(4) 0.022(5)
C13C 0.032(3) 0.040(3) 0.040(4) 0.009(3) 0.012(3) -0.001(2)
C14C 0.033(3) 0.037(2) 0.033(4) 0.010(4) 0.007(3) 0.001(2)
C15C 0.027(2) 0.039(2) 0.031(3) 0.008(2) 0.014(2) 0.0033(19)
C16C 0.025(4) 0.041(3) 0.031(6) 0.007(4) 0.012(4) 0.007(3)
C17C 0.027(3) 0.028(2) 0.029(4) 0.005(2) 0.003(3) 0.001(2)
C18C 0.038(3) 0.028(3) 0.026(4) 0.003(3) 0.001(3) 0.001(2)
C19C 0.041(4) 0.033(3) 0.029(4) 0.004(3) 0.006(3) 0.010(3)
C20C 0.034(4) 0.036(3) 0.027(4) 0.003(3) 0.011(3) 0.007(3)
C21C 0.030(3) 0.029(2) 0.028(3) 0.003(2) 0.009(2) 0.003(2)
C22C 0.026(3) 0.029(3) 0.035(3) 0.001(2) 0.013(2) 0.001(2)
C23C 0.0255(16) 0.0321(19) 0.051(3) -0.002(2) 0.0049(19) -0.0001(14)
C24C 0.043(3) 0.045(3) 0.055(4) -0.007(3) 0.013(3) -0.015(2)
C25C 0.047(2) 0.044(2) 0.061(4) -0.007(4) 0.020(3) -0.015(2)
C26C 0.037(2) 0.037(3) 0.057(4) -0.008(3) 0.005(3) -0.007(2)
C27C 0.054(5) 0.049(6) 0.067(8) -0.004(5) -0.009(4) 0.006(4)
C28C 0.061(4) 0.039(5) 0.070(8) -0.010(6) 0.001(6) -0.013(4)
C29C 0.065(3) 0.037(3) 0.064(5) 0.005(4) 0.012(4) -0.003(3)
C30C 0.042(2) 0.036(3) 0.066(5) -0.004(4) 0.012(4) 0.004(2)
C31C 0.0365(18) 0.030(3) 0.057(3) -0.006(3) 0.011(2) -0.008(2)
C32C 0.075(6) 0.031(7) 0.057(6) -0.009(5) 0.022(5) -0.013(5)
N1C 0.022(2) 0.027(3) 0.028(4) -0.002(3) 0.003(3) -0.004(2)
N2C 0.025(2) 0.0285(18) 0.0341(14) 0.0011(13) 0.0125(15) 0.0032(13)
N3C 0.022(2) 0.0273(18) 0.025(3) 0.0016(18) 0.005(2) 0.0009(16)
N4C 0.0230(14) 0.0259(18) 0.0350(16) -0.0006(15) 0.0068(12) -0.0009(13)
Cu2 0.0266(16) 0.0362(7) 0.0396(10) -0.0023(7) 0.0147(11) -0.0009(10)
C1B 0.028(3) 0.039(4) 0.050(3) 0.009(3) 0.015(2) 0.002(3)
C2B 0.032(3) 0.036(3) 0.060(4) 0.007(3) 0.021(3) 0.001(2)
C3B 0.032(3) 0.032(2) 0.068(5) 0.006(3) 0.028(3) -0.0023(19)
C4B 0.034(3) 0.030(3) 0.065(4) 0.005(3) 0.029(3) -0.002(2)
C5B 0.030(3) 0.033(3) 0.055(2) 0.0026(19) 0.0235(18) -0.001(2)
C6B 0.032(3) 0.027(3) 0.049(2) -0.005(3) 0.023(2) -0.006(3)
C7B 0.029(3) 0.034(3) 0.038(2) -0.002(2) 0.013(2) -0.007(2)
C8B 0.036(3) 0.043(3) 0.043(3) 0.001(3) 0.019(2) -0.006(2)
C9B 0.036(3) 0.043(3) 0.043(3) 0.001(3) 0.019(2) -0.006(2)
C10B 0.038(3) 0.052(4) 0.041(3) 0.007(3) 0.012(2) -0.007(3)
C11B 0.045(4) 0.085(8) 0.040(3) -0.003(5) 0.011(3) -0.010(5)
C12B 0.051(5) 0.083(7) 0.051(5) 0.025(5) 0.016(3) 0.008(4)
C13B 0.039(3) 0.042(4) 0.050(4) 0.008(3) 0.011(3) -0.010(3)
C14B 0.036(3) 0.035(3) 0.048(4) 0.004(3) 0.007(3) -0.004(2)
C15B 0.031(3) 0.039(3) 0.037(3) 0.002(2) 0.012(2) -0.005(2)
C16B 0.028(4) 0.033(6) 0.038(4) -0.001(3) 0.010(4) -0.005(3)
C17B 0.027(4) 0.032(3) 0.040(2) 0.0028(19) 0.012(2) 0.000(3)
C18B 0.027(4) 0.034(2) 0.044(2) -0.0015(18) 0.007(3) 0.000(3)
C19B 0.028(4) 0.046(2) 0.0358(19) -0.0085(19) 0.005(3) 0.001(4)
C20B 0.024(4) 0.049(3) 0.029(3) -0.003(2) 0.005(3) -0.002(3)
C21B 0.028(3) 0.039(2) 0.029(2) 0.0021(17) 0.009(2) -0.002(2)
C22B 0.032(3) 0.038(3) 0.041(2) 0.004(2) 0.016(2) -0.004(3)
C23B 0.0260(19) 0.033(2) 0.064(3) -0.002(2) 0.0067(18) 0.0012(15)
C24B 0.041(4) 0.041(4) 0.079(3) 0.002(3) 0.011(3) -0.008(3)
C25B 0.045(3) 0.040(3) 0.088(3) 0.005(3) 0.001(3) -0.010(3)
C26B 0.043(2) 0.038(2) 0.085(3) -0.002(2) -0.004(2) -0.0093(19)
C27B 0.038(4) 0.058(4) 0.116(8) 0.012(5) -0.003(5) 0.004(3)
C28B 0.071(4) 0.044(6) 0.085(7) 0.000(5) -0.014(6) -0.017(5)
C29B 0.055(4) 0.044(3) 0.095(5) 0.002(4) 0.001(3) 0.000(3)
C30B 0.048(3) 0.050(4) 0.094(5) -0.013(4) 0.006(4) 0.003(3)
C31B 0.040(2) 0.040(3) 0.076(3) -0.007(3) 0.005(2) -0.003(2)
C32B 0.075(7) 0.072(8) 0.066(6) -0.024(5) 0.014(5) -0.019(5)
N1B 0.027(3) 0.0374(18) 0.0494(19) 0.0042(16) 0.0158(15) -0.0001(17)
N2B 0.029(3) 0.027(3) 0.0400(19) -0.003(2) 0.016(2) -0.008(3)
N3B 0.0268(16) 0.0323(17) 0.029(3) 0.0035(16) 0.0073(19) -0.0003(12)
N4B 0.026(3) 0.0306(17) 0.0436(16) -0.0023(14) 0.0119(16) -0.0030(17)
Cu2' 0.0266(16) 0.0362(7) 0.0396(10) -0.0023(7) 0.0147(11) -0.0009(10)
C1D 0.028(3) 0.039(4) 0.050(3) 0.009(3) 0.015(2) 0.002(3)
C2D 0.032(3) 0.036(3) 0.060(4) 0.007(3) 0.021(3) 0.001(2)
C3D 0.032(3) 0.032(2) 0.068(5) 0.006(3) 0.028(3) -0.0023(19)
C4D 0.034(3) 0.030(3) 0.065(4) 0.005(3) 0.029(3) -0.002(2)
C5D 0.030(3) 0.033(3) 0.055(2) 0.0026(19) 0.0235(18) -0.001(2)
C6D 0.032(3) 0.027(3) 0.049(2) -0.005(3) 0.023(2) -0.006(3)
C7D 0.029(3) 0.034(3) 0.038(2) -0.002(2) 0.013(2) -0.007(2)
C8D 0.036(3) 0.043(3) 0.043(3) 0.001(3) 0.019(2) -0.006(2)
C9D 0.037(3) 0.052(4) 0.043(3) 0.006(3) 0.016(3) -0.011(3)
C10D 0.038(3) 0.052(4) 0.041(3) 0.007(3) 0.012(2) -0.007(3)
C11D 0.045(4) 0.085(8) 0.040(3) -0.003(5) 0.011(3) -0.010(5)
C12D 0.051(5) 0.083(7) 0.051(5) 0.025(5) 0.016(3) 0.008(4)
C13D 0.039(3) 0.042(4) 0.050(4) 0.008(3) 0.011(3) -0.010(3)
C14D 0.036(3) 0.035(3) 0.048(4) 0.004(3) 0.007(3) -0.004(2)
C15D 0.031(3) 0.039(3) 0.037(3) 0.002(2) 0.012(2) -0.005(2)
C16D 0.028(4) 0.033(6) 0.038(4) -0.001(3) 0.010(4) -0.005(3)
C17D 0.027(4) 0.032(3) 0.040(2) 0.0028(19) 0.012(2) 0.000(3)
C18D 0.027(4) 0.034(2) 0.044(2) -0.0015(18) 0.007(3) 0.000(3)
C19D 0.028(4) 0.046(2) 0.0358(19) -0.0085(19) 0.005(3) 0.001(4)
C20D 0.024(4) 0.049(3) 0.029(3) -0.003(2) 0.005(3) -0.002(3)
C21D 0.028(3) 0.039(2) 0.029(2) 0.0021(17) 0.009(2) -0.002(2)
C22D 0.032(3) 0.038(3) 0.041(2) 0.004(2) 0.016(2) -0.004(3)
C23D 0.0260(19) 0.033(2) 0.064(3) -0.002(2) 0.0067(18) 0.0012(15)
C24D 0.041(4) 0.041(4) 0.079(3) 0.002(3) 0.011(3) -0.008(3)
C25D 0.045(3) 0.040(3) 0.088(3) 0.005(3) 0.001(3) -0.010(3)
C26D 0.043(2) 0.038(2) 0.085(3) -0.002(2) -0.004(2) -0.0093(19)
C27D 0.038(4) 0.058(4) 0.116(8) 0.012(5) -0.003(5) 0.004(3)
C28D 0.071(4) 0.044(6) 0.085(7) 0.000(5) -0.014(6) -0.017(5)
C29D 0.055(4) 0.044(3) 0.095(5) 0.002(4) 0.001(3) 0.000(3)
C30D 0.048(3) 0.050(4) 0.094(5) -0.013(4) 0.006(4) 0.003(3)
C31D 0.040(2) 0.040(3) 0.076(3) -0.007(3) 0.005(2) -0.003(2)
C32D 0.075(7) 0.072(8) 0.066(6) -0.024(5) 0.014(5) -0.019(5)
N1D 0.027(3) 0.0374(18) 0.0494(19) 0.0042(16) 0.0158(15) -0.0001(17)
N2D 0.029(3) 0.027(3) 0.0400(19) -0.003(2) 0.016(2) -0.008(3)
N3D 0.0268(16) 0.0323(17) 0.029(3) 0.0035(16) 0.0073(19) -0.0003(12)
N4D 0.026(3) 0.0306(17) 0.0436(16) -0.0023(14) 0.0119(16) -0.0030(17)
P1 0.0582(6) 0.0349(6) 0.0434(5) 0.0006(6) 0.0201(5) -0.0066(7)
F1 0.125(3) 0.076(3) 0.0504(17) -0.0169(17) 0.0186(18) -0.010(2)
F2 0.069(2) 0.205(6) 0.116(3) -0.030(4) 0.051(2) -0.025(3)
F3 0.085(2) 0.057(2) 0.0472(15) 0.0016(14) 0.0118(14) -0.0038(16)
F4 0.064(2) 0.135(4) 0.098(3) 0.001(3) 0.0372(19) -0.002(2)
F5 0.174(4) 0.047(2) 0.0547(18) 0.0046(16) 0.017(2) -0.015(2)
F6 0.135(4) 0.042(2) 0.094(3) 0.0038(19) 0.012(2) -0.002(2)
P2 0.054(5) 0.040(4) 0.052(4) 0.000(3) 0.018(4) -0.001(3)
F7 0.066(11) 0.082(10) 0.046(7) -0.007(7) 0.000(7) 0.000(8)
F8 0.059(11) 0.052(9) 0.057(8) -0.007(6) -0.001(6) -0.002(8)
F9 0.091(8) 0.056(7) 0.055(6) 0.010(5) 0.012(6) -0.026(6)
F10 0.073(8) 0.076(9) 0.083(7) -0.006(7) 0.009(6) 0.035(7)
F11 0.067(6) 0.073(8) 0.062(6) 0.002(6) 0.026(5) 0.017(6)
F12 0.081(9) 0.060(8) 0.083(8) 0.004(7) 0.035(6) -0.032(7)
P2' 0.0414(14) 0.0314(13) 0.0356(13) -0.0010(10) 0.0133(11) -0.0065(11)
F7' 0.059(4) 0.062(4) 0.038(3) -0.009(3) 0.006(2) -0.003(3)
F8' 0.062(5) 0.049(3) 0.033(2) -0.001(2) 0.012(2) -0.003(3)
F9' 0.106(4) 0.040(2) 0.052(2) 0.0046(19) 0.013(2) -0.007(2)
F10' 0.048(2) 0.096(4) 0.069(2) 0.005(3) 0.0255(18) -0.005(3)
F11' 0.043(2) 0.113(5) 0.074(3) -0.010(3) 0.027(2) -0.008(3)
F12' 0.097(5) 0.037(3) 0.066(3) 0.001(2) 0.010(3) -0.003(3)
C1S 0.203(11) 0.232(14) 0.212(11) -0.146(11) 0.168(10) -0.122(10)
C2S 0.074(4) 0.115(6) 0.095(4) 0.025(5) 0.053(3) 0.012(4)
O1S 0.056(2) 0.096(3) 0.110(3) -0.023(3) 0.039(2) -0.012(2)
C3S 0.074(4) 0.073(4) 0.077(4) 0.003(3) 0.017(3) -0.006(3)
C4S 0.147(7) 0.085(6) 0.083(5) 0.009(4) 0.029(5) 0.047(5)
 
_geom_special_details
;
 All esds (except the esd in the dihedral angle between two l.s. planes)
 are estimated using the full covariance matrix.  The cell esds are taken
 into account individually in the estimation of esds in distances, angles
 and torsion angles; correlations between esds in cell parameters are only
 used when they are defined by crystal symmetry.  An approximate (isotropic)
 treatment of cell esds is used for estimating esds involving l.s. planes.
;
 
loop_
 _geom_bond_atom_site_label_1
 _geom_bond_atom_site_label_2
 _geom_bond_distance
 _geom_bond_site_symmetry_2
 _geom_bond_publ_flag
Cu1 N2A 2.027(10) . ?
Cu1 N3A 2.037(10) . ?
Cu1 N1A 2.084(10) . ?
Cu1 N4A 2.088(10) . ?
C1A N1A 1.339(11) . ?
C1A C2A 1.389(12) . ?
C1A H1A 0.9500 . ?
C2A C3A 1.389(11) . ?
C2A H2A 0.9500 . ?
C3A C4A 1.373(12) . ?
C3A H3A 0.9500 . ?
C4A C5A 1.402(11) . ?
C4A H4A 0.9500 . ?
C5A N1A 1.351(11) . ?
C5A C6A 1.497(11) . ?
C6A N2A 1.481(12) . ?
C6A H6A1 0.9900 . ?
C6A H6A2 0.9900 . ?
C7A N2A 1.270(11) . ?
C7A C15A 1.499(12) . ?
C7A C8A 1.535(12) . ?
C8A C9A 1.544(12) . ?
C8A H8A1 0.9900 . ?
C8A H8A2 0.9900 . ?
C9A C10A 1.541(11) . ?
C9A C13A 1.547(12) . ?
C9A H9A 1.0000 . ?
C10A C11A 1.513(12) . ?
C10A C12A 1.543(12) . ?
C10A C15A 1.560(11) . ?
C11A H11A 0.9800 . ?
C11A H11B 0.9800 . ?
C11A H11C 0.9800 . ?
C12A H12A 0.9800 . ?
C12A H12B 0.9800 . ?
C12A H12C 0.9800 . ?
C13A C14A 1.565(11) . ?
C13A H13A 0.9900 . ?
C13A H13B 0.9900 . ?
C14A C15A 1.556(12) . ?
C14A H14A 0.9900 . ?
C14A H14B 0.9900 . ?
C15A C16A 1.520(12) . ?
C16A H16A 0.9800 . ?
C16A H16B 0.9800 . ?
C16A H16C 0.9800 . ?
C17A N3A 1.355(12) . ?
C17A C18A 1.368(12) . ?
C17A H17A 0.9500 . ?
C18A C19A 1.431(14) . ?
C18A H18A 0.9500 . ?
C19A C20A 1.369(12) . ?
C19A H19A 0.9500 . ?
C20A C21A 1.401(12) . ?
C20A H20A 0.9500 . ?
C21A N3A 1.337(12) . ?
C21A C22A 1.494(12) . ?
C22A N4A 1.471(12) . ?
C22A H22A 0.9900 . ?
C22A H22B 0.9900 . ?
C23A N4A 1.277(12) . ?
C23A C31A 1.482(12) . ?
C23A C24A 1.537(12) . ?
C24A C25A 1.525(12) . ?
C24A H24A 0.9900 . ?
C24A H24B 0.9900 . ?
C25A C29A 1.512(13) . ?
C25A C26A 1.568(12) . ?
C25A H25A 1.0000 . ?
C26A C28A 1.517(13) . ?
C26A C27A 1.529(13) . ?
C26A C31A 1.574(12) . ?
C27A H27A 0.9800 . ?
C27A H27B 0.9800 . ?
C27A H27C 0.9800 . ?
C28A H28A 0.9800 . ?
C28A H28B 0.9800 . ?
C28A H28C 0.9800 . ?
C29A C30A 1.514(13) . ?
C29A H29A 0.9900 . ?
C29A H29B 0.9900 . ?
C30A C31A 1.582(12) . ?
C30A H30A 0.9900 . ?
C30A H30B 0.9900 . ?
C31A C32A 1.502(13) . ?
C32A H32A 0.9800 . ?
C32A H32B 0.9800 . ?
C32A H32C 0.9800 . ?
Cu1' N2C 2.036(11) . ?
Cu1' N3C 2.040(11) . ?
Cu1' N1C 2.079(12) . ?
Cu1' N4C 2.094(12) . ?
C1C N1C 1.342(13) . ?
C1C C2C 1.387(13) . ?
C1C H1C 0.9500 . ?
C2C C3C 1.376(13) . ?
C2C H2C 0.9500 . ?
C3C C4C 1.377(13) . ?
C3C H3C 0.9500 . ?
C4C C5C 1.398(13) . ?
C4C H4C 0.9500 . ?
C5C N1C 1.350(13) . ?
C5C C6C 1.505(13) . ?
C6C N2C 1.492(14) . ?
C6C H6C1 0.9900 . ?
C6C H6C2 0.9900 . ?
C7C N2C 1.286(12) . ?
C7C C15C 1.514(14) . ?
C7C C8C 1.529(14) . ?
C8C C9C 1.564(12) . ?
C8C H8C1 0.9900 . ?
C8C H8C2 0.9900 . ?
C9C C13C 1.520(12) . ?
C9C C10C 1.566(12) . ?
C9C H9C 1.0000 . ?
C10C C11C 1.512(14) . ?
C10C C12C 1.541(13) . ?
C10C C15C 1.563(12) . ?
C11C H11D 0.9800 . ?
C11C H11E 0.9800 . ?
C11C H11F 0.9800 . ?
C12C H12D 0.9800 . ?
C12C H12E 0.9800 . ?
C12C H12F 0.9800 . ?
C13C C14C 1.549(13) . ?
C13C H13C 0.9900 . ?
C13C H13D 0.9900 . ?
C14C C15C 1.554(14) . ?
C14C H14C 0.9900 . ?
C14C H14D 0.9900 . ?
C15C C16C 1.521(13) . ?
C16C H16D 0.9800 . ?
C16C H16E 0.9800 . ?
C16C H16F 0.9800 . ?
C17C N3C 1.351(13) . ?
C17C C18C 1.376(14) . ?
C17C H17C 0.9500 . ?
C18C C19C 1.421(15) . ?
C18C H18C 0.9500 . ?
C19C C20C 1.382(13) . ?
C19C H19C 0.9500 . ?
C20C C21C 1.401(13) . ?
C20C H20C 0.9500 . ?
C21C N3C 1.335(14) . ?
C21C C22C 1.507(13) . ?
C22C N4C 1.481(14) . ?
C22C H22C 0.9900 . ?
C22C H22D 0.9900 . ?
C23C N4C 1.286(13) . ?
C23C C31C 1.490(13) . ?
C23C C24C 1.546(14) . ?
C24C C25C 1.532(14) . ?
C24C H24C 0.9900 . ?
C24C H24D 0.9900 . ?
C25C C26C 1.545(14) . ?
C25C C29C 1.586(14) . ?
C25C H25C 1.0000 . ?
C26C C28C 1.521(14) . ?
C26C C27C 1.522(14) . ?
C26C C31C 1.572(13) . ?
C27C H27D 0.9800 . ?
C27C H27E 0.9800 . ?
C27C H27F 0.9800 . ?
C28C H28D 0.9800 . ?
C28C H28E 0.9800 . ?
C28C H28F 0.9800 . ?
C29C C30C 1.507(14) . ?
C29C H29C 0.9900 . ?
C29C H29D 0.9900 . ?
C30C C31C 1.544(14) . ?
C30C H30C 0.9900 . ?
C30C H30D 0.9900 . ?
C31C C32C 1.487(14) . ?
C32C H32D 0.9800 . ?
C32C H32E 0.9800 . ?
C32C H32F 0.9800 . ?
Cu2 N2B 2.016(14) . ?
Cu2 N3B 2.034(14) . ?
Cu2 N4B 2.079(15) . ?
Cu2 N1B 2.091(16) . ?
C1B N1B 1.347(16) . ?
C1B C2B 1.391(17) . ?
C1B H1B 0.9500 . ?
C2B C3B 1.357(17) . ?
C2B H2B 0.9500 . ?
C3B C4B 1.400(17) . ?
C3B H3B 0.9500 . ?
C4B C5B 1.402(16) . ?
C4B H4B 0.9500 . ?
C5B N1B 1.336(16) . ?
C5B C6B 1.501(16) . ?
C6B N2B 1.492(16) . ?
C6B H6B1 0.9900 . ?
C6B H6B2 0.9900 . ?
C7B N2B 1.272(15) . ?
C7B C15B 1.513(15) . ?
C7B C8B 1.520(15) . ?
C8B C9B 1.539(15) . ?
C8B H8B1 0.9900 . ?
C8B H8B2 0.9900 . ?
C9B C13B 1.524(16) . ?
C9B C10B 1.550(15) . ?
C9B H9B 1.0000 . ?
C10B C11B 1.521(17) . ?
C10B C12B 1.534(16) . ?
C10B C15B 1.576(15) . ?
C11B H11G 0.9800 . ?
C11B H11H 0.9800 . ?
C11B H11I 0.9800 . ?
C12B H12G 0.9800 . ?
C12B H12H 0.9800 . ?
C12B H12I 0.9800 . ?
C13B C14B 1.572(16) . ?
C13B H13E 0.9900 . ?
C13B H13F 0.9900 . ?
C14B C15B 1.543(15) . ?
C14B H14E 0.9900 . ?
C14B H14F 0.9900 . ?
C15B C16B 1.517(16) . ?
C16B H16G 0.9800 . ?
C16B H16H 0.9800 . ?
C16B H16I 0.9800 . ?
C17B N3B 1.359(17) . ?
C17B C18B 1.369(17) . ?
C17B H17B 0.9500 . ?
C18B C19B 1.383(17) . ?
C18B H18B 0.9500 . ?
C19B C20B 1.376(17) . ?
C19B H19B 0.9500 . ?
C20B C21B 1.393(16) . ?
C20B H20B 0.9500 . ?
C21B N3B 1.337(17) . ?
C21B C22B 1.512(17) . ?
C22B N4B 1.472(16) . ?
C22B H22E 0.9900 . ?
C22B H22F 0.9900 . ?
C23B N4B 1.273(15) . ?
C23B C31B 1.504(16) . ?
C23B C24B 1.548(17) . ?
C24B C25B 1.536(17) . ?
C24B H24E 0.9900 . ?
C24B H24F 0.9900 . ?
C25B C26B 1.515(18) . ?
C25B C29B 1.540(18) . ?
C25B H25B 1.0000 . ?
C26B C27B 1.516(18) . ?
C26B C28B 1.541(18) . ?
C26B C31B 1.554(17) . ?
C27B H27G 0.9800 . ?
C27B H27H 0.9800 . ?
C27B H27I 0.9800 . ?
C28B H28G 0.9800 . ?
C28B H28H 0.9800 . ?
C28B H28I 0.9800 . ?
C29B C30B 1.468(19) . ?
C29B H29E 0.9900 . ?
C29B H29F 0.9900 . ?
C30B C31B 1.607(17) . ?
C30B H30E 0.9900 . ?
C30B H30F 0.9900 . ?
C31B C32B 1.454(18) . ?
C32B H32G 0.9800 . ?
C32B H32H 0.9800 . ?
C32B H32I 0.9800 . ?
Cu2' N2D 2.026(8) . ?
Cu2' N3D 2.030(8) . ?
Cu2' N1D 2.091(9) . ?
Cu2' N4D 2.096(8) . ?
C1D N1D 1.348(10) . ?
C1D C2D 1.391(10) . ?
C1D H1D 0.9500 . ?
C2D C3D 1.368(9) . ?
C2D H2D 0.9500 . ?
C3D C4D 1.399(10) . ?
C3D H3D 0.9500 . ?
C4D C5D 1.401(10) . ?
C4D H4D 0.9500 . ?
C5D N1D 1.343(10) . ?
C5D C6D 1.498(10) . ?
C6D N2D 1.492(9) . ?
C6D H6D1 0.9900 . ?
C6D H6D2 0.9900 . ?
C7D N2D 1.281(9) . ?
C7D C15D 1.512(9) . ?
C7D C8D 1.516(9) . ?
C8D C9D 1.565(9) . ?
C8D H8D1 0.9900 . ?
C8D H8D2 0.9900 . ?
C9D C13D 1.528(10) . ?
C9D C10D 1.550(9) . ?
C9D H9D 1.0000 . ?
C10D C11D 1.515(11) . ?
C10D C12D 1.542(10) . ?
C10D C15D 1.562(9) . ?
C11D H11J 0.9800 . ?
C11D H11K 0.9800 . ?
C11D H11L 0.9800 . ?
C12D H12J 0.9800 . ?
C12D H12K 0.9800 . ?
C12D H12L 0.9800 . ?
C13D C14D 1.551(9) . ?
C13D H13G 0.9900 . ?
C13D H13H 0.9900 . ?
C14D C15D 1.561(9) . ?
C14D H14G 0.9900 . ?
C14D H14H 0.9900 . ?
C15D C16D 1.507(9) . ?
C16D H16J 0.9800 . ?
C16D H16K 0.9800 . ?
C16D H16L 0.9800 . ?
C17D N3D 1.357(10) . ?
C17D C18D 1.375(10) . ?
C17D H17D 0.9500 . ?
C18D C19D 1.385(10) . ?
C18D H18D 0.9500 . ?
C19D C20D 1.370(10) . ?
C19D H19D 0.9500 . ?
C20D C21D 1.396(10) . ?
C20D H20D 0.9500 . ?
C21D N3D 1.345(10) . ?
C21D C22D 1.512(11) . ?
C22D N4D 1.477(10) . ?
C22D H22G 0.9900 . ?
C22D H22H 0.9900 . ?
C23D N4D 1.275(9) . ?
C23D C31D 1.493(11) . ?
C23D C24D 1.553(11) . ?
C24D C25D 1.556(11) . ?
C24D H24G 0.9900 . ?
C24D H24H 0.9900 . ?
C25D C26D 1.512(12) . ?
C25D C29D 1.536(11) . ?
C25D H25D 1.0000 . ?
C26D C27D 1.518(12) . ?
C26D C28D 1.543(12) . ?
C26D C31D 1.557(10) . ?
C27D H27J 0.9800 . ?
C27D H27K 0.9800 . ?
C27D H27L 0.9800 . ?
C28D H28J 0.9800 . ?
C28D H28K 0.9800 . ?
C28D H28L 0.9800 . ?
C29D C30D 1.498(13) . ?
C29D H29G 0.9900 . ?
C29D H29H 0.9900 . ?
C30D C31D 1.586(11) . ?
C30D H30G 0.9900 . ?
C30D H30H 0.9900 . ?
C31D C32D 1.465(11) . ?
C32D H32J 0.9800 . ?
C32D H32K 0.9800 . ?
C32D H32L 0.9800 . ?
P1 F2 1.548(4) . ?
P1 F6 1.570(4) . ?
P1 F5 1.577(4) . ?
P1 F1 1.578(3) . ?
P1 F4 1.591(4) . ?
P1 F3 1.610(3) . ?
P2 F11 1.567(15) . ?
P2 F7 1.580(17) . ?
P2 F12 1.581(16) . ?
P2 F9 1.584(16) . ?
P2 F10 1.589(16) . ?
P2 F8 1.610(17) . ?
P2' F11' 1.559(6) . ?
P2' F9' 1.591(6) . ?
P2' F12' 1.592(6) . ?
P2' F7' 1.596(6) . ?
P2' F10' 1.601(6) . ?
P2' F8' 1.605(6) . ?
C1S C2S 1.479(11) . ?
C1S H1S1 0.9800 . ?
C1S H1S2 0.9800 . ?
C1S H1S3 0.9800 . ?
C2S O1S 1.387(7) . ?
C2S H2S1 0.9900 . ?
C2S H2S2 0.9900 . ?
O1S C3S 1.422(7) . ?
C3S C4S 1.476(9) . ?
C3S H3S1 0.9900 . ?
C3S H3S2 0.9900 . ?
C4S H4S1 0.9800 . ?
C4S H4S2 0.9800 . ?
C4S H4S3 0.9800 . ?
 
loop_
 _geom_angle_atom_site_label_1
 _geom_angle_atom_site_label_2
 _geom_angle_atom_site_label_3
 _geom_angle
 _geom_angle_site_symmetry_1
 _geom_angle_site_symmetry_3
 _geom_angle_publ_flag
N2A Cu1 N3A 129.6(10) . . ?
N2A Cu1 N1A 82.5(5) . . ?
N3A Cu1 N1A 129.3(11) . . ?
N2A Cu1 N4A 132.4(13) . . ?
N3A Cu1 N4A 82.7(6) . . ?
N1A Cu1 N4A 103.9(9) . . ?
N1A C1A C2A 123.4(11) . . ?
N1A C1A H1A 118.3 . . ?
C2A C1A H1A 118.3 . . ?
C1A C2A C3A 119.1(11) . . ?
C1A C2A H2A 120.4 . . ?
C3A C2A H2A 120.4 . . ?
C4A C3A C2A 118.5(11) . . ?
C4A C3A H3A 120.7 . . ?
C2A C3A H3A 120.7 . . ?
C3A C4A C5A 119.0(11) . . ?
C3A C4A H4A 120.5 . . ?
C5A C4A H4A 120.5 . . ?
N1A C5A C4A 122.8(10) . . ?
N1A C5A C6A 117.6(10) . . ?
C4A C5A C6A 119.5(10) . . ?
N2A C6A C5A 112.4(9) . . ?
N2A C6A H6A1 109.1 . . ?
C5A C6A H6A1 109.1 . . ?
N2A C6A H6A2 109.1 . . ?
C5A C6A H6A2 109.1 . . ?
H6A1 C6A H6A2 107.9 . . ?
N2A C7A C15A 126.4(13) . . ?
N2A C7A C8A 125.2(12) . . ?
C15A C7A C8A 108.2(9) . . ?
C7A C8A C9A 99.8(8) . . ?
C7A C8A H8A1 111.8 . . ?
C9A C8A H8A1 111.8 . . ?
C7A C8A H8A2 111.8 . . ?
C9A C8A H8A2 111.8 . . ?
H8A1 C8A H8A2 109.5 . . ?
C10A C9A C8A 102.0(8) . . ?
C10A C9A C13A 103.9(8) . . ?
C8A C9A C13A 106.5(8) . . ?
C10A C9A H9A 114.4 . . ?
C8A C9A H9A 114.4 . . ?
C13A C9A H9A 114.4 . . ?
C11A C10A C9A 115.3(12) . . ?
C11A C10A C12A 108.6(10) . . ?
C9A C10A C12A 111.6(10) . . ?
C11A C10A C15A 113.5(11) . . ?
C9A C10A C15A 94.1(7) . . ?
C12A C10A C15A 113.3(9) . . ?
C10A C11A H11A 109.5 . . ?
C10A C11A H11B 109.5 . . ?
H11A C11A H11B 109.5 . . ?
C10A C11A H11C 109.5 . . ?
H11A C11A H11C 109.5 . . ?
H11B C11A H11C 109.5 . . ?
C10A C12A H12A 109.5 . . ?
C10A C12A H12B 109.5 . . ?
H12A C12A H12B 109.5 . . ?
C10A C12A H12C 109.5 . . ?
H12A C12A H12C 109.5 . . ?
H12B C12A H12C 109.5 . . ?
C9A C13A C14A 102.9(8) . . ?
C9A C13A H13A 111.2 . . ?
C14A C13A H13A 111.2 . . ?
C9A C13A H13B 111.2 . . ?
C14A C13A H13B 111.2 . . ?
H13A C13A H13B 109.1 . . ?
C15A C14A C13A 103.4(8) . . ?
C15A C14A H14A 111.1 . . ?
C13A C14A H14A 111.1 . . ?
C15A C14A H14B 111.1 . . ?
C13A C14A H14B 111.1 . . ?
H14A C14A H14B 109.0 . . ?
C7A C15A C16A 118.6(14) . . ?
C7A C15A C14A 103.0(13) . . ?
C16A C15A C14A 115.3(14) . . ?
C7A C15A C10A 100.0(11) . . ?
C16A C15A C10A 114.7(12) . . ?
C14A C15A C10A 102.9(8) . . ?
C15A C16A H16A 109.5 . . ?
C15A C16A H16B 109.5 . . ?
H16A C16A H16B 109.5 . . ?
C15A C16A H16C 109.5 . . ?
H16A C16A H16C 109.5 . . ?
H16B C16A H16C 109.5 . . ?
N3A C17A C18A 123.6(13) . . ?
N3A C17A H17A 118.2 . . ?
C18A C17A H17A 118.2 . . ?
C17A C18A C19A 118.1(13) . . ?
C17A C18A H18A 120.9 . . ?
C19A C18A H18A 120.9 . . ?
C20A C19A C18A 117.2(11) . . ?
C20A C19A H19A 121.4 . . ?
C18A C19A H19A 121.4 . . ?
C19A C20A C21A 119.7(11) . . ?
C19A C20A H20A 120.2 . . ?
C21A C20A H20A 120.2 . . ?
N3A C21A C20A 123.2(11) . . ?
N3A C21A C22A 118.4(11) . . ?
C20A C21A C22A 118.3(12) . . ?
N4A C22A C21A 112.7(11) . . ?
N4A C22A H22A 109.1 . . ?
C21A C22A H22A 109.1 . . ?
N4A C22A H22B 109.1 . . ?
C21A C22A H22B 109.1 . . ?
H22A C22A H22B 107.8 . . ?
N4A C23A C31A 127.9(12) . . ?
N4A C23A C24A 124.2(12) . . ?
C31A C23A C24A 107.6(9) . . ?
C25A C24A C23A 101.7(9) . . ?
C25A C24A H24A 111.4 . . ?
C23A C24A H24A 111.4 . . ?
C25A C24A H24B 111.4 . . ?
C23A C24A H24B 111.4 . . ?
H24A C24A H24B 109.3 . . ?
C29A C25A C24A 107.3(10) . . ?
C29A C25A C26A 102.9(8) . . ?
C24A C25A C26A 101.9(8) . . ?
C29A C25A H25A 114.5 . . ?
C24A C25A H25A 114.5 . . ?
C26A C25A H25A 114.5 . . ?
C28A C26A C27A 107.7(11) . . ?
C28A C26A C25A 113.7(10) . . ?
C27A C26A C25A 110.2(10) . . ?
C28A C26A C31A 114.0(11) . . ?
C27A C26A C31A 116.8(10) . . ?
C25A C26A C31A 94.0(7) . . ?
C26A C27A H27A 109.5 . . ?
C26A C27A H27B 109.5 . . ?
H27A C27A H27B 109.5 . . ?
C26A C27A H27C 109.5 . . ?
H27A C27A H27C 109.5 . . ?
H27B C27A H27C 109.5 . . ?
C26A C28A H28A 109.5 . . ?
C26A C28A H28B 109.5 . . ?
H28A C28A H28B 109.5 . . ?
C26A C28A H28C 109.5 . . ?
H28A C28A H28C 109.5 . . ?
H28B C28A H28C 109.5 . . ?
C25A C29A C30A 102.9(9) . . ?
C25A C29A H29A 111.2 . . ?
C30A C29A H29A 111.2 . . ?
C25A C29A H29B 111.2 . . ?
C30A C29A H29B 111.2 . . ?
H29A C29A H29B 109.1 . . ?
C29A C30A C31A 106.3(8) . . ?
C29A C30A H30A 110.5 . . ?
C31A C30A H30A 110.5 . . ?
C29A C30A H30B 110.5 . . ?
C31A C30A H30B 110.5 . . ?
H30A C30A H30B 108.7 . . ?
C23A C31A C32A 117.1(11) . . ?
C23A C31A C26A 99.6(10) . . ?
C32A C31A C26A 122.9(10) . . ?
C23A C31A C30A 103.3(12) . . ?
C32A C31A C30A 111.4(9) . . ?
C26A C31A C30A 99.6(8) . . ?
C31A C32A H32A 109.5 . . ?
C31A C32A H32B 109.5 . . ?
H32A C32A H32B 109.5 . . ?
C31A C32A H32C 109.5 . . ?
H32A C32A H32C 109.5 . . ?
H32B C32A H32C 109.5 . . ?
C1A N1A C5A 117.0(10) . . ?
C1A N1A Cu1 128.4(10) . . ?
C5A N1A Cu1 112.7(8) . . ?
C7A N2A C6A 112.8(11) . . ?
C7A N2A Cu1 134.2(11) . . ?
C6A N2A Cu1 113.0(8) . . ?
C21A N3A C17A 116.8(11) . . ?
C21A N3A Cu1 113.8(9) . . ?
C17A N3A Cu1 129.3(11) . . ?
C23A N4A C22A 112.0(12) . . ?
C23A N4A Cu1 136.5(13) . . ?
C22A N4A Cu1 109.1(8) . . ?
N2C Cu1' N3C 128.7(11) . . ?
N2C Cu1' N1C 84.2(6) . . ?
N3C Cu1' N1C 125.7(12) . . ?
N2C Cu1' N4C 133.8(15) . . ?
N3C Cu1' N4C 82.9(7) . . ?
N1C Cu1' N4C 104.5(11) . . ?
N1C C1C C2C 122.9(13) . . ?
N1C C1C H1C 118.6 . . ?
C2C C1C H1C 118.6 . . ?
C3C C2C C1C 117.9(12) . . ?
C3C C2C H2C 121.1 . . ?
C1C C2C H2C 121.1 . . ?
C2C C3C C4C 120.3(13) . . ?
C2C C3C H3C 119.9 . . ?
C4C C3C H3C 119.9 . . ?
C3C C4C C5C 118.9(13) . . ?
C3C C4C H4C 120.5 . . ?
C5C C4C H4C 120.5 . . ?
N1C C5C C4C 121.0(12) . . ?
N1C C5C C6C 116.8(12) . . ?
C4C C5C C6C 122.0(13) . . ?
N2C C6C C5C 112.1(12) . . ?
N2C C6C H6C1 109.2 . . ?
C5C C6C H6C1 109.2 . . ?
N2C C6C H6C2 109.2 . . ?
C5C C6C H6C2 109.2 . . ?
H6C1 C6C H6C2 107.9 . . ?
N2C C7C C15C 125.7(14) . . ?
N2C C7C C8C 128.3(15) . . ?
C15C C7C C8C 105.5(10) . . ?
C7C C8C C9C 102.7(9) . . ?
C7C C8C H8C1 111.2 . . ?
C9C C8C H8C1 111.2 . . ?
C7C C8C H8C2 111.2 . . ?
C9C C8C H8C2 111.2 . . ?
H8C1 C8C H8C2 109.1 . . ?
C13C C9C C8C 106.9(9) . . ?
C13C C9C C10C 104.1(9) . . ?
C8C C9C C10C 99.9(8) . . ?
C13C C9C H9C 114.8 . . ?
C8C C9C H9C 114.8 . . ?
C10C C9C H9C 114.8 . . ?
C11C C10C C12C 107.2(12) . . ?
C11C C10C C15C 112.3(13) . . ?
C12C C10C C15C 115.1(11) . . ?
C11C C10C C9C 116.3(13) . . ?
C12C C10C C9C 112.3(12) . . ?
C15C C10C C9C 93.6(8) . . ?
C10C C11C H11D 109.5 . . ?
C10C C11C H11E 109.5 . . ?
H11D C11C H11E 109.5 . . ?
C10C C11C H11F 109.5 . . ?
H11D C11C H11F 109.5 . . ?
H11E C11C H11F 109.5 . . ?
C10C C12C H12D 109.5 . . ?
C10C C12C H12E 109.5 . . ?
H12D C12C H12E 109.5 . . ?
C10C C12C H12F 109.5 . . ?
H12D C12C H12F 109.5 . . ?
H12E C12C H12F 109.5 . . ?
C9C C13C C14C 102.7(9) . . ?
C9C C13C H13C 111.2 . . ?
C14C C13C H13C 111.2 . . ?
C9C C13C H13D 111.2 . . ?
C14C C13C H13D 111.2 . . ?
H13C C13C H13D 109.1 . . ?
C13C C14C C15C 104.8(10) . . ?
C13C C14C H14C 110.8 . . ?
C15C C14C H14C 110.8 . . ?
C13C C14C H14D 110.8 . . ?
C15C C14C H14D 110.8 . . ?
H14C C14C H14D 108.9 . . ?
C7C C15C C16C 116.1(17) . . ?
C7C C15C C14C 104.4(15) . . ?
C16C C15C C14C 114.1(16) . . ?
C7C C15C C10C 101.0(12) . . ?
C16C C15C C10C 117.2(14) . . ?
C14C C15C C10C 102.0(9) . . ?
C15C C16C H16D 109.5 . . ?
C15C C16C H16E 109.5 . . ?
H16D C16C H16E 109.5 . . ?
C15C C16C H16F 109.5 . . ?
H16D C16C H16F 109.5 . . ?
H16E C16C H16F 109.5 . . ?
N3C C17C C18C 122.7(16) . . ?
N3C C17C H17C 118.6 . . ?
C18C C17C H17C 118.6 . . ?
C17C C18C C19C 117.1(16) . . ?
C17C C18C H18C 121.4 . . ?
C19C C18C H18C 121.4 . . ?
C20C C19C C18C 118.2(13) . . ?
C20C C19C H19C 120.9 . . ?
C18C C19C H19C 120.9 . . ?
C19C C20C C21C 119.5(13) . . ?
C19C C20C H20C 120.2 . . ?
C21C C20C H20C 120.2 . . ?
N3C C21C C20C 120.9(13) . . ?
N3C C21C C22C 118.9(12) . . ?
C20C C21C C22C 120.1(14) . . ?
N4C C22C C21C 111.9(13) . . ?
N4C C22C H22C 109.2 . . ?
C21C C22C H22C 109.2 . . ?
N4C C22C H22D 109.2 . . ?
C21C C22C H22D 109.2 . . ?
H22C C22C H22D 107.9 . . ?
N4C C23C C31C 126.2(14) . . ?
N4C C23C C24C 127.3(13) . . ?
C31C C23C C24C 106.5(10) . . ?
C25C C24C C23C 101.2(10) . . ?
C25C C24C H24C 111.5 . . ?
C23C C24C H24C 111.5 . . ?
C25C C24C H24D 111.5 . . ?
C23C C24C H24D 111.5 . . ?
H24C C24C H24D 109.3 . . ?
C24C C25C C26C 101.2(10) . . ?
C24C C25C C29C 107.8(11) . . ?
C26C C25C C29C 101.0(10) . . ?
C24C C25C H25C 115.0 . . ?
C26C C25C H25C 115.0 . . ?
C29C C25C H25C 115.0 . . ?
C28C C26C C27C 107.2(12) . . ?
C28C C26C C25C 112.6(11) . . ?
C27C C26C C25C 120.7(12) . . ?
C28C C26C C31C 116.7(13) . . ?
C27C C26C C31C 105.3(12) . . ?
C25C C26C C31C 94.1(9) . . ?
C26C C27C H27D 109.5 . . ?
C26C C27C H27E 109.5 . . ?
H27D C27C H27E 109.5 . . ?
C26C C27C H27F 109.5 . . ?
H27D C27C H27F 109.5 . . ?
H27E C27C H27F 109.5 . . ?
C26C C28C H28D 109.5 . . ?
C26C C28C H28E 109.5 . . ?
H28D C28C H28E 109.5 . . ?
C26C C28C H28F 109.5 . . ?
H28D C28C H28F 109.5 . . ?
H28E C28C H28F 109.5 . . ?
C30C C29C C25C 103.3(10) . . ?
C30C C29C H29C 111.1 . . ?
C25C C29C H29C 111.1 . . ?
C30C C29C H29D 111.1 . . ?
C25C C29C H29D 111.1 . . ?
H29C C29C H29D 109.1 . . ?
C29C C30C C31C 105.3(10) . . ?
C29C C30C H30C 110.7 . . ?
C31C C30C H30C 110.7 . . ?
C29C C30C H30D 110.7 . . ?
C31C C30C H30D 110.7 . . ?
H30C C30C H30D 108.8 . . ?
C32C C31C C23C 118.5(13) . . ?
C32C C31C C30C 116.2(11) . . ?
C23C C31C C30C 104.4(14) . . ?
C32C C31C C26C 113.2(12) . . ?
C23C C31C C26C 102.6(11) . . ?
C30C C31C C26C 99.5(10) . . ?
C31C C32C H32D 109.5 . . ?
C31C C32C H32E 109.5 . . ?
H32D C32C H32E 109.5 . . ?
C31C C32C H32F 109.5 . . ?
H32D C32C H32F 109.5 . . ?
H32E C32C H32F 109.5 . . ?
C1C N1C C5C 118.9(12) . . ?
C1C N1C Cu1' 127.0(12) . . ?
C5C N1C Cu1' 110.3(9) . . ?
C7C N2C C6C 117.7(14) . . ?
C7C N2C Cu1' 131.0(13) . . ?
C6C N2C Cu1' 110.2(9) . . ?
C21C N3C C17C 119.6(12) . . ?
C21C N3C Cu1' 112.2(11) . . ?
C17C N3C Cu1' 128.2(12) . . ?
C23C N4C C22C 117.4(14) . . ?
C23C N4C Cu1' 134.0(13) . . ?
C22C N4C Cu1' 106.7(10) . . ?
N2B Cu2 N3B 130.7(12) . . ?
N2B Cu2 N4B 135.7(13) . . ?
N3B Cu2 N4B 83.7(8) . . ?
N2B Cu2 N1B 83.4(8) . . ?
N3B Cu2 N1B 120.8(17) . . ?
N4B Cu2 N1B 103.3(14) . . ?
N1B C1B C2B 119.9(18) . . ?
N1B C1B H1B 120.0 . . ?
C2B C1B H1B 120.0 . . ?
C3B C2B C1B 119.6(18) . . ?
C3B C2B H2B 120.2 . . ?
C1B C2B H2B 120.2 . . ?
C2B C3B C4B 120.3(18) . . ?
C2B C3B H3B 119.8 . . ?
C4B C3B H3B 119.8 . . ?
C3B C4B C5B 118.1(18) . . ?
C3B C4B H4B 121.0 . . ?
C5B C4B H4B 121.0 . . ?
N1B C5B C4B 120.2(17) . . ?
N1B C5B C6B 118.2(16) . . ?
C4B C5B C6B 121.6(17) . . ?
N2B C6B C5B 112.4(15) . . ?
N2B C6B H6B1 109.1 . . ?
C5B C6B H6B1 109.1 . . ?
N2B C6B H6B2 109.1 . . ?
C5B C6B H6B2 109.1 . . ?
H6B1 C6B H6B2 107.9 . . ?
N2B C7B C15B 126.4(15) . . ?
N2B C7B C8B 126.2(14) . . ?
C15B C7B C8B 107.3(11) . . ?
C7B C8B C9B 101.7(10) . . ?
C7B C8B H8B1 111.4 . . ?
C9B C8B H8B1 111.4 . . ?
C7B C8B H8B2 111.4 . . ?
C9B C8B H8B2 111.4 . . ?
H8B1 C8B H8B2 109.3 . . ?
C13B C9B C8B 107.7(11) . . ?
C13B C9B C10B 105.0(11) . . ?
C8B C9B C10B 100.2(10) . . ?
C13B C9B H9B 114.2 . . ?
C8B C9B H9B 114.2 . . ?
C10B C9B H9B 114.2 . . ?
C11B C10B C12B 108.3(13) . . ?
C11B C10B C9B 116.0(14) . . ?
C12B C10B C9B 112.6(12) . . ?
C11B C10B C15B 111.6(13) . . ?
C12B C10B C15B 114.0(13) . . ?
C9B C10B C15B 93.9(10) . . ?
C10B C11B H11G 109.5 . . ?
C10B C11B H11H 109.5 . . ?
H11G C11B H11H 109.5 . . ?
C10B C11B H11I 109.5 . . ?
H11G C11B H11I 109.5 . . ?
H11H C11B H11I 109.5 . . ?
C10B C12B H12G 109.5 . . ?
C10B C12B H12H 109.5 . . ?
H12G C12B H12H 109.5 . . ?
C10B C12B H12I 109.5 . . ?
H12G C12B H12I 109.5 . . ?
H12H C12B H12I 109.5 . . ?
C9B C13B C14B 101.7(10) . . ?
C9B C13B H13E 111.4 . . ?
C14B C13B H13E 111.4 . . ?
C9B C13B H13F 111.4 . . ?
C14B C13B H13F 111.4 . . ?
H13E C13B H13F 109.3 . . ?
C15B C14B C13B 105.1(11) . . ?
C15B C14B H14E 110.7 . . ?
C13B C14B H14E 110.7 . . ?
C15B C14B H14F 110.7 . . ?
C13B C14B H14F 110.7 . . ?
H14E C14B H14F 108.8 . . ?
C7B C15B C16B 117.0(16) . . ?
C7B C15B C14B 104.7(12) . . ?
C16B C15B C14B 116.4(14) . . ?
C7B C15B C10B 98.9(11) . . ?
C16B C15B C10B 115.8(15) . . ?
C14B C15B C10B 101.4(10) . . ?
C15B C16B H16G 109.5 . . ?
C15B C16B H16H 109.5 . . ?
H16G C16B H16H 109.5 . . ?
C15B C16B H16I 109.5 . . ?
H16G C16B H16I 109.5 . . ?
H16H C16B H16I 109.5 . . ?
N3B C17B C18B 122.3(19) . . ?
N3B C17B H17B 118.8 . . ?
C18B C17B H17B 118.8 . . ?
C17B C18B C19B 118.3(19) . . ?
C17B C18B H18B 120.8 . . ?
C19B C18B H18B 120.8 . . ?
C20B C19B C18B 119.7(18) . . ?
C20B C19B H19B 120.2 . . ?
C18B C19B H19B 120.2 . . ?
C19B C20B C21B 119.1(17) . . ?
C19B C20B H20B 120.5 . . ?
C21B C20B H20B 120.5 . . ?
N3B C21B C20B 121.3(16) . . ?
N3B C21B C22B 119.0(17) . . ?
C20B C21B C22B 118.9(16) . . ?
N4B C22B C21B 112.9(14) . . ?
N4B C22B H22E 109.0 . . ?
C21B C22B H22E 109.0 . . ?
N4B C22B H22F 109.0 . . ?
C21B C22B H22F 109.0 . . ?
H22E C22B H22F 107.8 . . ?
N4B C23B C31B 128.6(17) . . ?
N4B C23B C24B 123.8(17) . . ?
C31B C23B C24B 107.5(13) . . ?
C25B C24B C23B 98.8(13) . . ?
C25B C24B H24E 112.0 . . ?
C23B C24B H24E 112.0 . . ?
C25B C24B H24F 112.0 . . ?
C23B C24B H24F 112.0 . . ?
H24E C24B H24F 109.7 . . ?
C26B C25B C24B 103.4(15) . . ?
C26B C25B C29B 104.4(15) . . ?
C24B C25B C29B 108.8(15) . . ?
C26B C25B H25B 113.1 . . ?
C24B C25B H25B 113.1 . . ?
C29B C25B H25B 113.1 . . ?
C25B C26B C27B 117(2) . . ?
C25B C26B C28B 110.4(18) . . ?
C27B C26B C28B 108.2(19) . . ?
C25B C26B C31B 93.6(12) . . ?
C27B C26B C31B 113(2) . . ?
C28B C26B C31B 114(2) . . ?
C26B C27B H27G 109.5 . . ?
C26B C27B H27H 109.5 . . ?
H27G C27B H27H 109.5 . . ?
C26B C27B H27I 109.5 . . ?
H27G C27B H27I 109.5 . . ?
H27H C27B H27I 109.5 . . ?
C26B C28B H28G 109.5 . . ?
C26B C28B H28H 109.5 . . ?
H28G C28B H28H 109.5 . . ?
C26B C28B H28I 109.5 . . ?
H28G C28B H28I 109.5 . . ?
H28H C28B H28I 109.5 . . ?
C30B C29B C25B 102.4(13) . . ?
C30B C29B H29E 111.3 . . ?
C25B C29B H29E 111.3 . . ?
C30B C29B H29F 111.3 . . ?
C25B C29B H29F 111.3 . . ?
H29E C29B H29F 109.2 . . ?
C29B C30B C31B 105.8(13) . . ?
C29B C30B H30E 110.6 . . ?
C31B C30B H30E 110.6 . . ?
C29B C30B H30F 110.6 . . ?
C31B C30B H30F 110.6 . . ?
H30E C30B H30F 108.7 . . ?
C32B C31B C23B 113.7(17) . . ?
C32B C31B C26B 120.3(17) . . ?
C23B C31B C26B 100.1(15) . . ?
C32B C31B C30B 117.6(17) . . ?
C23B C31B C30B 101.7(18) . . ?
C26B C31B C30B 100.4(13) . . ?
C31B C32B H32G 109.5 . . ?
C31B C32B H32H 109.5 . . ?
H32G C32B H32H 109.5 . . ?
C31B C32B H32I 109.5 . . ?
H32G C32B H32I 109.5 . . ?
H32H C32B H32I 109.5 . . ?
C5B N1B C1B 121.7(17) . . ?
C5B N1B Cu2 111.3(15) . . ?
C1B N1B Cu2 124.4(17) . . ?
C7B N2B C6B 115.8(14) . . ?
C7B N2B Cu2 131.7(14) . . ?
C6B N2B Cu2 112.0(11) . . ?
C21B N3B C17B 118.6(17) . . ?
C21B N3B Cu2 112.1(13) . . ?
C17B N3B Cu2 128.1(16) . . ?
C23B N4B C22B 114.9(16) . . ?
C23B N4B Cu2 133.7(18) . . ?
C22B N4B Cu2 109.6(11) . . ?
N2D Cu2' N3D 130.1(6) . . ?
N2D Cu2' N1D 83.5(4) . . ?
N3D Cu2' N1D 125.7(9) . . ?
N2D Cu2' N4D 134.6(7) . . ?
N3D Cu2' N4D 82.6(5) . . ?
N1D Cu2' N4D 102.6(7) . . ?
N1D C1D C2D 123.8(9) . . ?
N1D C1D H1D 118.1 . . ?
C2D C1D H1D 118.1 . . ?
C3D C2D C1D 119.0(9) . . ?
C3D C2D H2D 120.5 . . ?
C1D C2D H2D 120.5 . . ?
C2D C3D C4D 118.4(9) . . ?
C2D C3D H3D 120.8 . . ?
C4D C3D H3D 120.8 . . ?
C3D C4D C5D 119.3(9) . . ?
C3D C4D H4D 120.4 . . ?
C5D C4D H4D 120.4 . . ?
N1D C5D C4D 122.4(9) . . ?
N1D C5D C6D 117.5(10) . . ?
C4D C5D C6D 119.9(9) . . ?
N2D C6D C5D 112.2(8) . . ?
N2D C6D H6D1 109.2 . . ?
C5D C6D H6D1 109.2 . . ?
N2D C6D H6D2 109.2 . . ?
C5D C6D H6D2 109.2 . . ?
H6D1 C6D H6D2 107.9 . . ?
N2D C7D C15D 125.8(8) . . ?
N2D C7D C8D 126.7(8) . . ?
C15D C7D C8D 107.3(6) . . ?
C7D C8D C9D 101.0(6) . . ?
C7D C8D H8D1 111.6 . . ?
C9D C8D H8D1 111.6 . . ?
C7D C8D H8D2 111.6 . . ?
C9D C8D H8D2 111.6 . . ?
H8D1 C8D H8D2 109.4 . . ?
C13D C9D C10D 104.3(6) . . ?
C13D C9D C8D 107.1(6) . . ?
C10D C9D C8D 101.1(6) . . ?
C13D C9D H9D 114.4 . . ?
C10D C9D H9D 114.4 . . ?
C8D C9D H9D 114.4 . . ?
C11D C10D C12D 108.1(7) . . ?
C11D C10D C9D 115.6(7) . . ?
C12D C10D C9D 111.8(7) . . ?
C11D C10D C15D 113.4(7) . . ?
C12D C10D C15D 114.0(7) . . ?
C9D C10D C15D 93.6(5) . . ?
C10D C11D H11J 109.5 . . ?
C10D C11D H11K 109.5 . . ?
H11J C11D H11K 109.5 . . ?
C10D C11D H11L 109.5 . . ?
H11J C11D H11L 109.5 . . ?
H11K C11D H11L 109.5 . . ?
C10D C12D H12J 109.5 . . ?
C10D C12D H12K 109.5 . . ?
H12J C12D H12K 109.5 . . ?
C10D C12D H12L 109.5 . . ?
H12J C12D H12L 109.5 . . ?
H12K C12D H12L 109.5 . . ?
C9D C13D C14D 102.6(5) . . ?
C9D C13D H13G 111.2 . . ?
C14D C13D H13G 111.2 . . ?
C9D C13D H13H 111.2 . . ?
C14D C13D H13H 111.2 . . ?
H13G C13D H13H 109.2 . . ?
C13D C14D C15D 104.2(6) . . ?
C13D C14D H14G 110.9 . . ?
C15D C14D H14G 110.9 . . ?
C13D C14D H14H 110.9 . . ?
C15D C14D H14H 110.9 . . ?
H14G C14D H14H 108.9 . . ?
C16D C15D C7D 118.1(8) . . ?
C16D C15D C14D 113.6(7) . . ?
C7D C15D C14D 103.4(6) . . ?
C16D C15D C10D 116.8(7) . . ?
C7D C15D C10D 100.4(6) . . ?
C14D C15D C10D 102.3(6) . . ?
C15D C16D H16J 109.5 . . ?
C15D C16D H16K 109.5 . . ?
H16J C16D H16K 109.5 . . ?
C15D C16D H16L 109.5 . . ?
H16J C16D H16L 109.5 . . ?
H16K C16D H16L 109.5 . . ?
N3D C17D C18D 124.0(10) . . ?
N3D C17D H17D 118.0 . . ?
C18D C17D H17D 118.0 . . ?
C17D C18D C19D 119.2(10) . . ?
C17D C18D H18D 120.4 . . ?
C19D C18D H18D 120.4 . . ?
C20D C19D C18D 117.9(9) . . ?
C20D C19D H19D 121.0 . . ?
C18D C19D H19D 121.0 . . ?
C19D C20D C21D 119.6(8) . . ?
C19D C20D H20D 120.2 . . ?
C21D C20D H20D 120.2 . . ?
N3D C21D C20D 123.3(9) . . ?
N3D C21D C22D 116.7(9) . . ?
C20D C21D C22D 119.7(9) . . ?
N4D C22D C21D 111.6(9) . . ?
N4D C22D H22G 109.3 . . ?
C21D C22D H22G 109.3 . . ?
N4D C22D H22H 109.3 . . ?
C21D C22D H22H 109.3 . . ?
H22G C22D H22H 108.0 . . ?
N4D C23D C31D 127.2(10) . . ?
N4D C23D C24D 125.8(11) . . ?
C31D C23D C24D 106.8(7) . . ?
C23D C24D C25D 99.6(8) . . ?
C23D C24D H24G 111.8 . . ?
C25D C24D H24G 111.8 . . ?
C23D C24D H24H 111.8 . . ?
C25D C24D H24H 111.8 . . ?
H24G C24D H24H 109.6 . . ?
C26D C25D C29D 105.2(9) . . ?
C26D C25D C24D 102.7(8) . . ?
C29D C25D C24D 105.8(8) . . ?
C26D C25D H25D 114.0 . . ?
C29D C25D H25D 114.0 . . ?
C24D C25D H25D 114.0 . . ?
C25D C26D C27D 113.0(12) . . ?
C25D C26D C28D 113.9(10) . . ?
C27D C26D C28D 109.8(11) . . ?
C25D C26D C31D 94.2(7) . . ?
C27D C26D C31D 113.1(11) . . ?
C28D C26D C31D 112.2(11) . . ?
C26D C27D H27J 109.5 . . ?
C26D C27D H27K 109.5 . . ?
H27J C27D H27K 109.5 . . ?
C26D C27D H27L 109.5 . . ?
H27J C27D H27L 109.5 . . ?
H27K C27D H27L 109.5 . . ?
C26D C28D H28J 109.5 . . ?
C26D C28D H28K 109.5 . . ?
H28J C28D H28K 109.5 . . ?
C26D C28D H28L 109.5 . . ?
H28J C28D H28L 109.5 . . ?
H28K C28D H28L 109.5 . . ?
C30D C29D C25D 102.4(8) . . ?
C30D C29D H29G 111.3 . . ?
C25D C29D H29G 111.3 . . ?
C30D C29D H29H 111.3 . . ?
C25D C29D H29H 111.3 . . ?
H29G C29D H29H 109.2 . . ?
C29D C30D C31D 105.4(7) . . ?
C29D C30D H30G 110.7 . . ?
C31D C30D H30G 110.7 . . ?
C29D C30D H30H 110.7 . . ?
C31D C30D H30H 110.7 . . ?
H30G C30D H30H 108.8 . . ?
C32D C31D C23D 117.4(10) . . ?
C32D C31D C26D 118.2(9) . . ?
C23D C31D C26D 101.0(8) . . ?
C32D C31D C30D 114.2(9) . . ?
C23D C31D C30D 103.1(10) . . ?
C26D C31D C30D 100.2(8) . . ?
C31D C32D H32J 109.5 . . ?
C31D C32D H32K 109.5 . . ?
H32J C32D H32K 109.5 . . ?
C31D C32D H32L 109.5 . . ?
H32J C32D H32L 109.5 . . ?
H32K C32D H32L 109.5 . . ?
C5D N1D C1D 117.0(10) . . ?
C5D N1D Cu2' 110.8(8) . . ?
C1D N1D Cu2' 129.1(9) . . ?
C7D N2D C6D 115.0(8) . . ?
C7D N2D Cu2' 132.9(8) . . ?
C6D N2D Cu2' 111.3(6) . . ?
C21D N3D C17D 115.4(9) . . ?
C21D N3D Cu2' 114.1(7) . . ?
C17D N3D Cu2' 130.3(8) . . ?
C23D N4D C22D 114.1(10) . . ?
C23D N4D Cu2' 135.8(9) . . ?
C22D N4D Cu2' 107.4(7) . . ?
F2 P1 F6 91.7(3) . . ?
F2 P1 F5 91.1(3) . . ?
F6 P1 F5 177.2(3) . . ?
F2 P1 F1 90.6(2) . . ?
F6 P1 F1 90.5(2) . . ?
F5 P1 F1 89.5(2) . . ?
F2 P1 F4 178.1(3) . . ?
F6 P1 F4 88.9(3) . . ?
F5 P1 F4 88.3(3) . . ?
F1 P1 F4 91.2(2) . . ?
F2 P1 F3 89.3(2) . . ?
F6 P1 F3 90.30(19) . . ?
F5 P1 F3 89.67(18) . . ?
F1 P1 F3 179.2(2) . . ?
F4 P1 F3 88.9(2) . . ?
F11 P2 F7 88.9(12) . . ?
F11 P2 F12 88.3(11) . . ?
F7 P2 F12 92.3(15) . . ?
F11 P2 F9 88.9(11) . . ?
F7 P2 F9 90.1(14) . . ?
F12 P2 F9 176.2(14) . . ?
F11 P2 F10 177.3(14) . . ?
F7 P2 F10 93.8(13) . . ?
F12 P2 F10 92.0(12) . . ?
F9 P2 F10 90.7(12) . . ?
F11 P2 F8 86.8(13) . . ?
F7 P2 F8 174.5(16) . . ?
F12 P2 F8 90.9(14) . . ?
F9 P2 F8 86.4(14) . . ?
F10 P2 F8 90.5(14) . . ?
F11' P2' F9' 90.4(4) . . ?
F11' P2' F12' 91.5(5) . . ?
F9' P2' F12' 178.1(5) . . ?
F11' P2' F7' 91.7(4) . . ?
F9' P2' F7' 88.4(4) . . ?
F12' P2' F7' 91.4(5) . . ?
F11' P2' F10' 179.2(5) . . ?
F9' P2' F10' 89.6(4) . . ?
F12' P2' F10' 88.6(4) . . ?
F7' P2' F10' 89.1(4) . . ?
F11' P2' F8' 90.9(4) . . ?
F9' P2' F8' 90.4(5) . . ?
F12' P2' F8' 89.7(5) . . ?
F7' P2' F8' 177.1(5) . . ?
F10' P2' F8' 88.3(4) . . ?
C2S C1S H1S1 109.5 . . ?
C2S C1S H1S2 109.5 . . ?
H1S1 C1S H1S2 109.5 . . ?
C2S C1S H1S3 109.5 . . ?
H1S1 C1S H1S3 109.5 . . ?
H1S2 C1S H1S3 109.5 . . ?
O1S C2S C1S 109.7(6) . . ?
O1S C2S H2S1 109.7 . . ?
C1S C2S H2S1 109.7 . . ?
O1S C2S H2S2 109.7 . . ?
C1S C2S H2S2 109.7 . . ?
H2S1 C2S H2S2 108.2 . . ?
C2S O1S C3S 113.5(5) . . ?
O1S C3S C4S 107.6(6) . . ?
O1S C3S H3S1 110.2 . . ?
C4S C3S H3S1 110.2 . . ?
O1S C3S H3S2 110.2 . . ?
C4S C3S H3S2 110.2 . . ?
H3S1 C3S H3S2 108.5 . . ?
C3S C4S H4S1 109.5 . . ?
C3S C4S H4S2 109.5 . . ?
H4S1 C4S H4S2 109.5 . . ?
C3S C4S H4S3 109.5 . . ?
H4S1 C4S H4S3 109.5 . . ?
H4S2 C4S H4S3 109.5 . . ?
 
loop_
 _geom_torsion_atom_site_label_1
 _geom_torsion_atom_site_label_2
 _geom_torsion_atom_site_label_3
 _geom_torsion_atom_site_label_4
 _geom_torsion
 _geom_torsion_site_symmetry_1
 _geom_torsion_site_symmetry_2
 _geom_torsion_site_symmetry_3
 _geom_torsion_site_symmetry_4
 _geom_torsion_publ_flag
N1A C1A C2A C3A 1(2) . . . . ?
C1A C2A C3A C4A 0.1(18) . . . . ?
C2A C3A C4A C5A -2.2(19) . . . . ?
C3A C4A C5A N1A 4(2) . . . . ?
C3A C4A C5A C6A -178.1(14) . . . . ?
N1A C5A C6A N2A 14(3) . . . . ?
C4A C5A C6A N2A -165(2) . . . . ?
N2A C7A C8A C9A -180(4) . . . . ?
C15A C7A C8A C9A -3(2) . . . . ?
C7A C8A C9A C10A 38.3(16) . . . . ?
C7A C8A C9A C13A -70.4(16) . . . . ?
C8A C9A C10A C11A 61.3(13) . . . . ?
C13A C9A C10A C11A 171.8(11) . . . . ?
C8A C9A C10A C12A -174.2(9) . . . . ?
C13A C9A C10A C12A -63.6(10) . . . . ?
C8A C9A C10A C15A -57.1(9) . . . . ?
C13A C9A C10A C15A 53.5(9) . . . . ?
C10A C9A C13A C14A -34.5(10) . . . . ?
C8A C9A C13A C14A 72.7(10) . . . . ?
C9A C13A C14A C15A 0.1(11) . . . . ?
N2A C7A C15A C16A 19(5) . . . . ?
C8A C7A C15A C16A -157.3(19) . . . . ?
N2A C7A C15A C14A -110(4) . . . . ?
C8A C7A C15A C14A 74(2) . . . . ?
N2A C7A C15A C10A 144(4) . . . . ?
C8A C7A C15A C10A -32(2) . . . . ?
C13A C14A C15A C7A -70.0(10) . . . . ?
C13A C14A C15A C16A 159.3(14) . . . . ?
C13A C14A C15A C10A 33.6(11) . . . . ?
C11A C10A C15A C7A -66.7(17) . . . . ?
C9A C10A C15A C7A 53.1(13) . . . . ?
C12A C10A C15A C7A 168.8(15) . . . . ?
C11A C10A C15A C16A 61.2(19) . . . . ?
C9A C10A C15A C16A -178.9(16) . . . . ?
C12A C10A C15A C16A -63.2(19) . . . . ?
C11A C10A C15A C14A -172.7(13) . . . . ?
C9A C10A C15A C14A -52.8(10) . . . . ?
C12A C10A C15A C14A 62.9(12) . . . . ?
N3A C17A C18A C19A 14(3) . . . . ?
C17A C18A C19A C20A -13.3(19) . . . . ?
C18A C19A C20A C21A 6(2) . . . . ?
C19A C20A C21A N3A 2(5) . . . . ?
C19A C20A C21A C22A 178.7(17) . . . . ?
N3A C21A C22A N4A 15(4) . . . . ?
C20A C21A C22A N4A -162(3) . . . . ?
N4A C23A C24A C25A 176(3) . . . . ?
C31A C23A C24A C25A 2(2) . . . . ?
C23A C24A C25A C29A -73.8(15) . . . . ?
C23A C24A C25A C26A 33.9(15) . . . . ?
C29A C25A C26A C28A -61.9(14) . . . . ?
C24A C25A C26A C28A -173.0(12) . . . . ?
C29A C25A C26A C27A 177.0(11) . . . . ?
C24A C25A C26A C27A 65.9(12) . . . . ?
C29A C25A C26A C31A 56.5(10) . . . . ?
C24A C25A C26A C31A -54.6(10) . . . . ?
C24A C25A C29A C30A 68.6(11) . . . . ?
C26A C25A C29A C30A -38.4(11) . . . . ?
C25A C29A C30A C31A 4.1(11) . . . . ?
N4A C23A C31A C32A 15(4) . . . . ?
C24A C23A C31A C32A -171.1(15) . . . . ?
N4A C23A C31A C26A 149(4) . . . . ?
C24A C23A C31A C26A -36.2(18) . . . . ?
N4A C23A C31A C30A -108(4) . . . . ?
C24A C23A C31A C30A 66.1(18) . . . . ?
C28A C26A C31A C23A 172.6(13) . . . . ?
C27A C26A C31A C23A -60.7(15) . . . . ?
C25A C26A C31A C23A 54.4(13) . . . . ?
C28A C26A C31A C32A -56.2(15) . . . . ?
C27A C26A C31A C32A 70.5(14) . . . . ?
C25A C26A C31A C32A -174.4(11) . . . . ?
C28A C26A C31A C30A 67.2(11) . . . . ?
C27A C26A C31A C30A -166.1(10) . . . . ?
C25A C26A C31A C30A -51.0(9) . . . . ?
C29A C30A C31A C23A -71.3(11) . . . . ?
C29A C30A C31A C32A 162.1(11) . . . . ?
C29A C30A C31A C26A 31.0(11) . . . . ?
C2A C1A N1A C5A 1(2) . . . . ?
C2A C1A N1A Cu1 -162.7(14) . . . . ?
C4A C5A N1A C1A -3(2) . . . . ?
C6A C5A N1A C1A 178.9(15) . . . . ?
C4A C5A N1A Cu1 163.1(14) . . . . ?
C6A C5A N1A Cu1 -15.2(18) . . . . ?
C15A C7A N2A C6A -173(3) . . . . ?
C8A C7A N2A C6A 3(5) . . . . ?
C15A C7A N2A Cu1 10(7) . . . . ?
C8A C7A N2A Cu1 -175(3) . . . . ?
C5A C6A N2A C7A 177(3) . . . . ?
C5A C6A N2A Cu1 -5(3) . . . . ?
C20A C21A N3A C17A -2(6) . . . . ?
C22A C21A N3A C17A -179(2) . . . . ?
C20A C21A N3A Cu1 175(2) . . . . ?
C22A C21A N3A Cu1 -2(5) . . . . ?
C18A C17A N3A C21A -6(4) . . . . ?
C18A C17A N3A Cu1 178(2) . . . . ?
C31A C23A N4A C22A 179(2) . . . . ?
C24A C23A N4A C22A 5(5) . . . . ?
C31A C23A N4A Cu1 19(6) . . . . ?
C24A C23A N4A Cu1 -155(2) . . . . ?
C21A C22A N4A C23A 175(3) . . . . ?
C21A C22A N4A Cu1 -20(3) . . . . ?
N1C C1C C2C C3C 3(2) . . . . ?
C1C C2C C3C C4C -2(2) . . . . ?
C2C C3C C4C C5C 0(2) . . . . ?
C3C C4C C5C N1C 1(3) . . . . ?
C3C C4C C5C C6C -173.3(17) . . . . ?
N1C C5C C6C N2C 29(3) . . . . ?
C4C C5C C6C N2C -156(3) . . . . ?
N2C C7C C8C C9C 170(4) . . . . ?
C15C C7C C8C C9C -1(3) . . . . ?
C7C C8C C9C C13C -71.2(19) . . . . ?
C7C C8C C9C C10C 36.9(18) . . . . ?
C13C C9C C10C C11C 171.2(13) . . . . ?
C8C C9C C10C C11C 60.8(14) . . . . ?
C13C C9C C10C C12C -64.9(12) . . . . ?
C8C C9C C10C C12C -175.2(10) . . . . ?
C13C C9C C10C C15C 54.2(10) . . . . ?
C8C C9C C10C C15C -56.2(10) . . . . ?
C8C C9C C13C C14C 69.8(11) . . . . ?
C10C C9C C13C C14C -35.4(12) . . . . ?
C9C C13C C14C C15C 1.2(13) . . . . ?
N2C C7C C15C C16C 25(5) . . . . ?
C8C C7C C15C C16C -163(2) . . . . ?
N2C C7C C15C C14C -101(4) . . . . ?
C8C C7C C15C C14C 71(2) . . . . ?
N2C C7C C15C C10C 153(4) . . . . ?
C8C C7C C15C C10C -35(2) . . . . ?
C13C C14C C15C C7C -71.8(12) . . . . ?
C13C C14C C15C C16C 160.5(17) . . . . ?
C13C C14C C15C C10C 33.1(13) . . . . ?
C11C C10C C15C C7C -65(2) . . . . ?
C12C C10C C15C C7C 172.4(17) . . . . ?
C9C C10C C15C C7C 55.8(15) . . . . ?
C11C C10C C15C C16C 63(2) . . . . ?
C12C C10C C15C C16C -60(2) . . . . ?
C9C C10C C15C C16C -177.1(19) . . . . ?
C11C C10C C15C C14C -172.0(15) . . . . ?
C12C C10C C15C C14C 64.9(14) . . . . ?
C9C C10C C15C C14C -51.7(11) . . . . ?
N3C C17C C18C C19C -13(3) . . . . ?
C17C C18C C19C C20C 16(2) . . . . ?
C18C C19C C20C C21C -10(3) . . . . ?
C19C C20C C21C N3C -1(5) . . . . ?
C19C C20C C21C C22C -177(2) . . . . ?
N3C C21C C22C N4C 17(5) . . . . ?
C20C C21C C22C N4C -167(3) . . . . ?
N4C C23C C24C C25C 173(4) . . . . ?
C31C C23C C24C C25C -9(2) . . . . ?
C23C C24C C25C C26C 41.7(17) . . . . ?
C23C C24C C25C C29C -63.8(17) . . . . ?
C24C C25C C26C C28C -177.5(15) . . . . ?
C29C C25C C26C C28C -66.7(16) . . . . ?
C24C C25C C26C C27C 54.1(15) . . . . ?
C29C C25C C26C C27C 164.9(13) . . . . ?
C24C C25C C26C C31C -56.3(11) . . . . ?
C29C C25C C26C C31C 54.5(11) . . . . ?
C24C C25C C29C C30C 73.0(12) . . . . ?
C26C C25C C29C C30C -32.7(12) . . . . ?
C25C C29C C30C C31C -4.0(13) . . . . ?
N4C C23C C31C C32C 26(5) . . . . ?
C24C C23C C31C C32C -152.0(18) . . . . ?
N4C C23C C31C C30C -105(4) . . . . ?
C24C C23C C31C C30C 77(2) . . . . ?
N4C C23C C31C C26C 152(4) . . . . ?
C24C C23C C31C C26C -27(2) . . . . ?
C29C C30C C31C C32C 160.2(13) . . . . ?
C29C C30C C31C C23C -67.4(13) . . . . ?
C29C C30C C31C C26C 38.4(12) . . . . ?
C28C C26C C31C C32C -62.9(16) . . . . ?
C27C C26C C31C C32C 55.8(15) . . . . ?
C25C C26C C31C C32C 179.2(12) . . . . ?
C28C C26C C31C C23C 168.2(16) . . . . ?
C27C C26C C31C C23C -73.0(17) . . . . ?
C25C C26C C31C C23C 50.4(15) . . . . ?
C28C C26C C31C C30C 61.0(14) . . . . ?
C27C C26C C31C C30C 179.8(11) . . . . ?
C25C C26C C31C C30C -56.9(11) . . . . ?
C2C C1C N1C C5C -1(3) . . . . ?
C2C C1C N1C Cu1' -157.2(17) . . . . ?
C4C C5C N1C C1C -1(3) . . . . ?
C6C C5C N1C C1C 174.2(18) . . . . ?
C4C C5C N1C Cu1' 158.8(17) . . . . ?
C6C C5C N1C Cu1' -26(2) . . . . ?
C15C C7C N2C C6C 169(3) . . . . ?
C8C C7C N2C C6C -1(7) . . . . ?
C15C C7C N2C Cu1' 3(7) . . . . ?
C8C C7C N2C Cu1' -168(3) . . . . ?
C5C C6C N2C C7C 175(4) . . . . ?
C5C C6C N2C Cu1' -16(3) . . . . ?
C20C C21C N3C C17C 5(7) . . . . ?
C22C C21C N3C C17C -179(3) . . . . ?
C20C C21C N3C Cu1' -172(2) . . . . ?
C22C C21C N3C Cu1' 4(5) . . . . ?
C18C C17C N3C C21C 2(5) . . . . ?
C18C C17C N3C Cu1' 178(2) . . . . ?
C31C C23C N4C C22C 177(3) . . . . ?
C24C C23C N4C C22C -5(6) . . . . ?
C31C C23C N4C Cu1' 15(7) . . . . ?
C24C C23C N4C Cu1' -167(3) . . . . ?
C21C C22C N4C C23C 166(4) . . . . ?
C21C C22C N4C Cu1' -28(3) . . . . ?
N1B C1B C2B C3B 3(5) . . . . ?
C1B C2B C3B C4B -3(4) . . . . ?
C2B C3B C4B C5B -1(5) . . . . ?
C3B C4B C5B N1B 4(6) . . . . ?
C3B C4B C5B C6B -179(4) . . . . ?
N1B C5B C6B N2B 16(5) . . . . ?
C4B C5B C6B N2B -161(4) . . . . ?
N2B C7B C8B C9B 179(2) . . . . ?
C15B C7B C8B C9B -3.0(15) . . . . ?
C7B C8B C9B C13B -70.8(13) . . . . ?
C7B C8B C9B C10B 38.8(14) . . . . ?
C13B C9B C10B C11B 170.1(13) . . . . ?
C8B C9B C10B C11B 58.4(15) . . . . ?
C13B C9B C10B C12B -64.3(15) . . . . ?
C8B C9B C10B C12B -176.0(13) . . . . ?
C13B C9B C10B C15B 53.7(12) . . . . ?
C8B C9B C10B C15B -57.9(12) . . . . ?
C8B C9B C13B C14B 72.4(12) . . . . ?
C10B C9B C13B C14B -33.8(13) . . . . ?
C9B C13B C14B C15B -1.1(14) . . . . ?
N2B C7B C15B C16B 20(3) . . . . ?
C8B C7B C15B C16B -158.1(16) . . . . ?
N2B C7B C15B C14B -111(2) . . . . ?
C8B C7B C15B C14B 71.3(15) . . . . ?
N2B C7B C15B C10B 145(2) . . . . ?
C8B C7B C15B C10B -33.0(14) . . . . ?
C13B C14B C15B C7B -68.0(13) . . . . ?
C13B C14B C15B C16B 161.1(18) . . . . ?
C13B C14B C15B C10B 34.4(13) . . . . ?
C11B C10B C15B C7B -65.2(15) . . . . ?
C12B C10B C15B C7B 171.6(13) . . . . ?
C9B C10B C15B C7B 54.8(12) . . . . ?
C11B C10B C15B C16B 61(2) . . . . ?
C12B C10B C15B C16B -62(2) . . . . ?
C9B C10B C15B C16B -179.4(17) . . . . ?
C11B C10B C15B C14B -172.3(14) . . . . ?
C12B C10B C15B C14B 64.6(15) . . . . ?
C9B C10B C15B C14B -52.3(12) . . . . ?
N3B C17B C18B C19B -6(5) . . . . ?
C17B C18B C19B C20B -1(3) . . . . ?
C18B C19B C20B C21B 4(3) . . . . ?
C19B C20B C21B N3B -1(6) . . . . ?
C19B C20B C21B C22B 169(3) . . . . ?
N3B C21B C22B N4B -6(6) . . . . ?
C20B C21B C22B N4B -176(3) . . . . ?
N4B C23B C24B C25B -180(4) . . . . ?
C31B C23B C24B C25B -3(3) . . . . ?
C23B C24B C25B C26B 38(2) . . . . ?
C23B C24B C25B C29B -72(2) . . . . ?
C24B C25B C26B C27B 60(3) . . . . ?
C29B C25B C26B C27B 174(2) . . . . ?
C24B C25B C26B C28B -176(2) . . . . ?
C29B C25B C26B C28B -62(2) . . . . ?
C24B C25B C26B C31B -58.0(16) . . . . ?
C29B C25B C26B C31B 55.9(16) . . . . ?
C26B C25B C29B C30B -38.5(19) . . . . ?
C24B C25B C29B C30B 71.5(19) . . . . ?
C25B C29B C30B C31B 4(2) . . . . ?
N4B C23B C31B C32B 15(6) . . . . ?
C24B C23B C31B C32B -162(2) . . . . ?
N4B C23B C31B C26B 144(5) . . . . ?
C24B C23B C31B C26B -32(3) . . . . ?
N4B C23B C31B C30B -113(5) . . . . ?
C24B C23B C31B C30B 70(3) . . . . ?
C25B C26B C31B C32B 178.9(19) . . . . ?
C27B C26B C31B C32B 57(3) . . . . ?
C28B C26B C31B C32B -67(3) . . . . ?
C25B C26B C31B C23B 53.6(18) . . . . ?
C27B C26B C31B C23B -68(3) . . . . ?
C28B C26B C31B C23B 168(2) . . . . ?
C25B C26B C31B C30B -50.3(15) . . . . ?
C27B C26B C31B C30B -172(2) . . . . ?
C28B C26B C31B C30B 64(2) . . . . ?
C29B C30B C31B C32B 163(2) . . . . ?
C29B C30B C31B C23B -72.4(18) . . . . ?
C29B C30B C31B C26B 30.3(19) . . . . ?
C4B C5B N1B C1B -4(7) . . . . ?
C6B C5B N1B C1B 179(5) . . . . ?
C4B C5B N1B Cu2 159(4) . . . . ?
C6B C5B N1B Cu2 -19(6) . . . . ?
C2B C1B N1B C5B 0(7) . . . . ?
C2B C1B N1B Cu2 -160(3) . . . . ?
C15B C7B N2B C6B -177.6(18) . . . . ?
C8B C7B N2B C6B 0(3) . . . . ?
C15B C7B N2B Cu2 12(3) . . . . ?
C8B C7B N2B Cu2 -170.8(18) . . . . ?
C5B C6B N2B C7B -177(3) . . . . ?
C5B C6B N2B Cu2 -5(3) . . . . ?
C20B C21B N3B C17B -6(8) . . . . ?
C22B C21B N3B C17B -176(4) . . . . ?
C20B C21B N3B Cu2 -174(3) . . . . ?
C22B C21B N3B Cu2 16(6) . . . . ?
C18B C17B N3B C21B 9(7) . . . . ?
C18B C17B N3B Cu2 176(3) . . . . ?
C31B C23B N4B C22B 180(3) . . . . ?
C24B C23B N4B C22B -4(7) . . . . ?
C31B C23B N4B Cu2 17(8) . . . . ?
C24B C23B N4B Cu2 -167(3) . . . . ?
C21B C22B N4B C23B -174(5) . . . . ?
C21B C22B N4B Cu2 -7(4) . . . . ?
N1D C1D C2D C3D 3(3) . . . . ?
C1D C2D C3D C4D -2(2) . . . . ?
C2D C3D C4D C5D -1(2) . . . . ?
C3D C4D C5D N1D 2(3) . . . . ?
C3D C4D C5D C6D -173.1(19) . . . . ?
N1D C5D C6D N2D 24(3) . . . . ?
C4D C5D C6D N2D -160.3(19) . . . . ?
N2D C7D C8D C9D 174.7(9) . . . . ?
C15D C7D C8D C9D -2.4(7) . . . . ?
C7D C8D C9D C13D -71.1(7) . . . . ?
C7D C8D C9D C10D 37.8(7) . . . . ?
C13D C9D C10D C11D 172.4(7) . . . . ?
C8D C9D C10D C11D 61.4(8) . . . . ?
C13D C9D C10D C12D -63.3(8) . . . . ?
C8D C9D C10D C12D -174.3(7) . . . . ?
C13D C9D C10D C15D 54.4(7) . . . . ?
C8D C9D C10D C15D -56.7(7) . . . . ?
C10D C9D C13D C14D -35.7(7) . . . . ?
C8D C9D C13D C14D 70.9(7) . . . . ?
C9D C13D C14D C15D 1.3(7) . . . . ?
N2D C7D C15D C16D 21.4(13) . . . . ?
C8D C7D C15D C16D -161.5(7) . . . . ?
N2D C7D C15D C14D -105.0(10) . . . . ?
C8D C7D C15D C14D 72.1(7) . . . . ?
N2D C7D C15D C10D 149.5(9) . . . . ?
C8D C7D C15D C10D -33.3(7) . . . . ?
C13D C14D C15D C16D 159.7(9) . . . . ?
C13D C14D C15D C7D -71.1(7) . . . . ?
C13D C14D C15D C10D 32.9(7) . . . . ?
C11D C10D C15D C16D 63.4(11) . . . . ?
C12D C10D C15D C16D -60.9(10) . . . . ?
C9D C10D C15D C16D -176.7(9) . . . . ?
C11D C10D C15D C7D -65.5(8) . . . . ?
C12D C10D C15D C7D 170.2(7) . . . . ?
C9D C10D C15D C7D 54.4(7) . . . . ?
C11D C10D C15D C14D -171.9(7) . . . . ?
C12D C10D C15D C14D 63.8(8) . . . . ?
C9D C10D C15D C14D -52.0(7) . . . . ?
N3D C17D C18D C19D 6(3) . . . . ?
C17D C18D C19D C20D 0.6(16) . . . . ?
C18D C19D C20D C21D -4.3(16) . . . . ?
C19D C20D C21D N3D 2(3) . . . . ?
C19D C20D C21D C22D -171.4(15) . . . . ?
N3D C21D C22D N4D 25(3) . . . . ?
C20D C21D C22D N4D -161.2(17) . . . . ?
N4D C23D C24D C25D 173(2) . . . . ?
C31D C23D C24D C25D -2.1(16) . . . . ?
C23D C24D C25D C26D 37.5(12) . . . . ?
C23D C24D C25D C29D -72.6(13) . . . . ?
C29D C25D C26D C27D 171.3(12) . . . . ?
C24D C25D C26D C27D 60.8(13) . . . . ?
C29D C25D C26D C28D -62.5(13) . . . . ?
C24D C25D C26D C28D -173.0(11) . . . . ?
C29D C25D C26D C31D 54.0(9) . . . . ?
C24D C25D C26D C31D -56.5(9) . . . . ?
C26D C25D C29D C30D -34.1(11) . . . . ?
C24D C25D C29D C30D 74.1(10) . . . . ?
C25D C29D C30D C31D -0.9(11) . . . . ?
N4D C23D C31D C32D 22(3) . . . . ?
C24D C23D C31D C32D -162.7(12) . . . . ?
N4D C23D C31D C26D 152(3) . . . . ?
C24D C23D C31D C26D -32.6(15) . . . . ?
N4D C23D C31D C30D -104(3) . . . . ?
C24D C23D C31D C30D 70.8(15) . . . . ?
C25D C26D C31D C32D -176.4(10) . . . . ?
C27D C26D C31D C32D 66.4(15) . . . . ?
C28D C26D C31D C32D -58.5(13) . . . . ?
C25D C26D C31D C23D 54.0(11) . . . . ?
C27D C26D C31D C23D -63.3(15) . . . . ?
C28D C26D C31D C23D 171.9(12) . . . . ?
C25D C26D C31D C30D -51.7(9) . . . . ?
C27D C26D C31D C30D -168.9(12) . . . . ?
C28D C26D C31D C30D 66.3(11) . . . . ?
C29D C30D C31D C32D 161.3(10) . . . . ?
C29D C30D C31D C23D -70.1(10) . . . . ?
C29D C30D C31D C26D 33.9(10) . . . . ?
C4D C5D N1D C1D -1(4) . . . . ?
C6D C5D N1D C1D 175(2) . . . . ?
C4D C5D N1D Cu2' 162(2) . . . . ?
C6D C5D N1D Cu2' -23(3) . . . . ?
C2D C1D N1D C5D -2(4) . . . . ?
C2D C1D N1D Cu2' -160.5(17) . . . . ?
C15D C7D N2D C6D 178.3(8) . . . . ?
C8D C7D N2D C6D 1.7(14) . . . . ?
C15D C7D N2D Cu2' 9.7(16) . . . . ?
C8D C7D N2D Cu2' -166.8(9) . . . . ?
C5D C6D N2D C7D 176.7(15) . . . . ?
C5D C6D N2D Cu2' -12.3(15) . . . . ?
C20D C21D N3D C17D 4(4) . . . . ?
C22D C21D N3D C17D 177.8(19) . . . . ?
C20D C21D N3D Cu2' -179.8(15) . . . . ?
C22D C21D N3D Cu2' -6(3) . . . . ?
C18D C17D N3D C21D -8(4) . . . . ?
C18D C17D N3D Cu2' 176.7(15) . . . . ?
C31D C23D N4D C22D 179.9(18) . . . . ?
C24D C23D N4D C22D 5(4) . . . . ?
C31D C23D N4D Cu2' 22(5) . . . . ?
C24D C23D N4D Cu2' -152.6(19) . . . . ?
C21D C22D N4D C23D 166(2) . . . . ?
C21D C22D N4D Cu2' -30(2) . . . . ?
C1S C2S O1S C3S -178.0(8) . . . . ?
C2S O1S C3S C4S -173.1(6) . . . . ?
 
_refine_diff_density_max    0.416
_refine_diff_density_min   -0.276
_refine_diff_density_rms    0.045

_shelx_res_file
;

    xs0883a.res created by SHELXL-2014/7


TITL xs0883a in P2(1)
CELL 1.54178  16.6953   9.71833  24.2042  90.000 107.5219  90.000
ZERR    2   0.0002   0.00014   0.0004   0.000   0.0015   0.000
LATT -1
SYMM -X, 0.5+Y, -Z
SFAC C H N F P CU O
UNIT 136 196 16 24 4 4 2

TEMP -163

ACTA
HTAB
BOND
BOND $H
CONF
WPDB

L.S. 20
FMAP 2
PLAN 10
OMIT -2 143.8

ABIN

WGHT    0.048900    1.689200
FVAR       2.96211   0.53616   0.35283   0.27106
PART 0
rem Cu complex A

rem constraints
EADP CU1 CU1'
EXYZ CU1 CU1'
EADP N1A N1C
EADP N2A N2C
EADP C1A C1C
EADP C2A C2C
EADP C3A C3C
EADP C4A C4C
EADP C5A C5C
EADP C6A C6C
EADP C7A C7C
EADP C8A C8C
EADP C9A C8C
EADP C10A C10C
EADP C11A C11C
EADP C12A C12C
EADP C13A C13C
EADP C14A C14C
EADP C15A C15C
EADP C16A C16C
EADP N3A N3C
EADP N4A N4C
EADP C17A C17C
EADP C18A C18C
EADP C19A C19C
EADP C20A C20C
EADP C21A C21C
EADP C22A C22C
EADP C23A C23C
EADP C24A C24C
EADP C25A C25C
EADP C26A C26C
EADP C27A C27C
EADP C28A C28C
EADP C29A C29C
EADP C30A C30C
EADP C31A C31C
EADP C32A C32C

rem restraints
SIMU 0.01 CU1 > N4C

PART 1
CU1   6    0.662978    0.684237    0.095112    21.00000    0.03016    0.02948 =
         0.03645   -0.00084    0.01719    0.00085
C1A   1    0.570072    0.945817    0.035500    21.00000    0.02670    0.02869 =
         0.02660   -0.00360    0.00434   -0.00470
AFIX  43
H1A   2    0.591084    0.926756    0.003934    21.00000   -1.20000
AFIX   0
C2A   1    0.530100    1.070874    0.036119    21.00000    0.02819    0.02568 =
         0.02515   -0.00339    0.00121   -0.00573
AFIX  43
H2A   2    0.523502    1.134802    0.005374    21.00000   -1.20000
AFIX   0
C3A   1    0.499896    1.101244    0.082286    21.00000    0.02873    0.02478 =
         0.02796   -0.00795    0.00246   -0.00174
AFIX  43
H3A   2    0.472260    1.186029    0.083702    21.00000   -1.20000
AFIX   0
C4A   1    0.510880    1.005958    0.125841    21.00000    0.02762    0.02758 =
         0.02924   -0.00759    0.00410   -0.00010
AFIX  43
H4A   2    0.492630    1.025028    0.158627    21.00000   -1.20000
AFIX   0
C5A   1    0.549429    0.880109    0.121204    21.00000    0.02280    0.02656 =
         0.02896   -0.00459    0.00603   -0.00278
C6A   1    0.559304    0.773662    0.167506    21.00000    0.02396    0.02852 =
         0.03168   -0.00339    0.00998    0.00254
AFIX  23
H6A1  2    0.578621    0.818849    0.205903    21.00000   -1.20000
H6A2  2    0.503994    0.731075    0.163571    21.00000   -1.20000
AFIX   0
C7A   1    0.631609    0.577401    0.205345    21.00000    0.02845    0.03442 =
         0.03358    0.00155    0.01393    0.00027
C8A   1    0.586102    0.576838    0.251823    21.00000    0.03458    0.04252 =
         0.03870    0.00712    0.01950    0.00518
AFIX  23
H8A1  2    0.524745    0.564397    0.234698    21.00000   -1.20000
H8A2  2    0.597238    0.661878    0.275431    21.00000   -1.20000
AFIX   0
C9A   1    0.627787    0.449864    0.287272    21.00000    0.03458    0.04252 =
         0.03870    0.00712    0.01950    0.00518
AFIX  13
H9A   2    0.621216    0.444629    0.326942    21.00000   -1.20000
AFIX   0
C10A  1    0.719354    0.463496    0.286455    21.00000    0.02994    0.04522 =
         0.03201    0.00817    0.01286    0.00679
C11A  1    0.764264    0.592763    0.314197    21.00000    0.04798    0.06431 =
         0.03624    0.00158    0.01255    0.00014
AFIX 137
H11A  2    0.730164    0.673364    0.297687    21.00000   -1.50000
H11B  2    0.818729    0.598980    0.306808    21.00000   -1.50000
H11C  2    0.772996    0.589694    0.356071    21.00000   -1.50000
AFIX   0
C12A  1    0.772554    0.337761    0.314497    21.00000    0.04314    0.06189 =
         0.03565    0.01488    0.01714    0.02200
AFIX 137
H12A  2    0.823251    0.333691    0.302120    21.00000   -1.50000
H12B  2    0.739642    0.253553    0.302414    21.00000   -1.50000
H12C  2    0.788565    0.346161    0.356771    21.00000   -1.50000
AFIX   0
C13A  1    0.594351    0.322607    0.248820    21.00000    0.03201    0.04038 =
         0.03998    0.00871    0.01222   -0.00115
AFIX  23
H13A  2    0.532680    0.327487    0.231153    21.00000   -1.20000
H13B  2    0.608781    0.236321    0.271376    21.00000   -1.20000
AFIX   0
C14A  1    0.640808    0.332239    0.201623    21.00000    0.03283    0.03666 =
         0.03280    0.00952    0.00659    0.00106
AFIX  23
H14A  2    0.676250    0.250089    0.202540    21.00000   -1.20000
H14B  2    0.600294    0.341542    0.162406    21.00000   -1.20000
AFIX   0
C15A  1    0.695504    0.464053    0.218972    21.00000    0.02674    0.03895 =
         0.03141    0.00845    0.01356    0.00333
C16A  1    0.769757    0.473763    0.195087    21.00000    0.02528    0.04141 =
         0.03140    0.00737    0.01172    0.00693
AFIX 137
H16A  2    0.749722    0.467365    0.152728    21.00000   -1.50000
H16B  2    0.808943    0.398243    0.210677    21.00000   -1.50000
H16C  2    0.798467    0.561939    0.206459    21.00000   -1.50000
AFIX   0
C17A  1    0.643282    0.414409    0.025637    21.00000    0.02701    0.02818 =
         0.02870    0.00544    0.00293    0.00150
AFIX  43
H17A  2    0.601858    0.388234    0.043258    21.00000   -1.20000
AFIX   0
C18A  1    0.660292    0.326136   -0.013412    21.00000    0.03777    0.02754 =
         0.02606    0.00299    0.00052    0.00077
AFIX  43
H18A  2    0.623718    0.251650   -0.029214    21.00000   -1.20000
AFIX   0
C19A  1    0.734719    0.349143   -0.029789    21.00000    0.04070    0.03315 =
         0.02892    0.00435    0.00640    0.00995
AFIX  43
H19A  2    0.755712    0.281332   -0.050098    21.00000   -1.20000
AFIX   0
C20A  1    0.774375    0.473027   -0.014944    21.00000    0.03396    0.03641 =
         0.02694    0.00328    0.01147    0.00703
AFIX  43
H20A  2    0.820978    0.496347   -0.027919    21.00000   -1.20000
AFIX   0
C21A  1    0.745890    0.565225    0.019474    21.00000    0.03049    0.02884 =
         0.02750    0.00276    0.00905    0.00251
C22A  1    0.791678    0.698340    0.035960    21.00000    0.02573    0.02865 =
         0.03546    0.00131    0.01326    0.00110
AFIX  23
H22A  2    0.852805    0.681372    0.045502    21.00000   -1.20000
H22B  2    0.775280    0.761716    0.002403    21.00000   -1.20000
AFIX   0
C23A  1    0.818785    0.872169    0.102404    21.00000    0.02554    0.03213 =
         0.05128   -0.00185    0.00493   -0.00007
C24A  1    0.878018    0.933286    0.070984    21.00000    0.04349    0.04510 =
         0.05472   -0.00663    0.01349   -0.01512
AFIX  23
H24A  2    0.924827    0.869728    0.072119    21.00000   -1.20000
H24B  2    0.847540    0.955846    0.030173    21.00000   -1.20000
AFIX   0
C25A  1    0.909363    1.062852    0.106482    21.00000    0.04727    0.04411 =
         0.06072   -0.00740    0.01951   -0.01536
AFIX  13
H25A  2    0.963807    1.099265    0.103272    21.00000   -1.20000
AFIX   0
C26A  1    0.912305    1.015262    0.168954    21.00000    0.03668    0.03684 =
         0.05737   -0.00835    0.00509   -0.00734
C27A  1    0.978929    0.903520    0.190444    21.00000    0.05369    0.04942 =
         0.06707   -0.00369   -0.00865    0.00596
AFIX 137
H27A  2    0.989692    0.890192    0.232184    21.00000   -1.50000
H27B  2    1.030976    0.931630    0.182814    21.00000   -1.50000
H27C  2    0.958815    0.817131    0.170107    21.00000   -1.50000
AFIX   0
C28A  1    0.931837    1.130472    0.213289    21.00000    0.06126    0.03900 =
         0.07000   -0.01038    0.00101   -0.01266
AFIX 137
H28A  2    0.887176    1.199756    0.202434    21.00000   -1.50000
H28B  2    0.985554    1.173074    0.214527    21.00000   -1.50000
H28C  2    0.935401    1.093021    0.251549    21.00000   -1.50000
AFIX   0
C29A  1    0.838153    1.165721    0.091335    21.00000    0.06474    0.03724 =
         0.06382    0.00507    0.01188   -0.00289
AFIX  23
H29A  2    0.814491    1.176633    0.048851    21.00000   -1.20000
H29B  2    0.856946    1.256615    0.108960    21.00000   -1.20000
AFIX   0
C30A  1    0.774826    1.101338    0.117047    21.00000    0.04243    0.03629 =
         0.06559   -0.00423    0.01151    0.00421
AFIX  23
H30A  2    0.722721    1.077295    0.086098    21.00000   -1.20000
H30B  2    0.760506    1.165947    0.144261    21.00000   -1.20000
AFIX   0
C31A  1    0.817834    0.967409    0.150047    21.00000    0.03646    0.02983 =
         0.05698   -0.00583    0.01138   -0.00765
C32A  1    0.774260    0.918613    0.192437    21.00000    0.07521    0.03065 =
         0.05686   -0.00906    0.02185   -0.01320
AFIX 137
H32A  2    0.715700    0.896142    0.171659    21.00000   -1.50000
H32B  2    0.775897    0.991379    0.220787    21.00000   -1.50000
H32C  2    0.802753    0.836485    0.212520    21.00000   -1.50000
AFIX   0
N1A   3    0.580514    0.850747    0.077100    21.00000    0.02215    0.02743 =
         0.02798   -0.00232    0.00337   -0.00375
N2A   3    0.619935    0.664690    0.164608    21.00000    0.02480    0.02854 =
         0.03415    0.00110    0.01248    0.00317
N3A   3    0.682310    0.537150    0.040547    21.00000    0.02187    0.02730 =
         0.02463    0.00158    0.00528    0.00091
N4A   3    0.774187    0.764472    0.085782    21.00000    0.02302    0.02592 =
         0.03502   -0.00059    0.00683   -0.00094

PART 2
SAME CU1 > N4A
CU1'  6    0.662978    0.684237    0.095112   -21.00000    0.03016    0.02948 =
         0.03645   -0.00084    0.01719    0.00085
C1C   1    0.566210    0.928633    0.025003   -21.00000    0.02670    0.02869 =
         0.02660   -0.00360    0.00434   -0.00470
AFIX  43
H1C   2    0.589194    0.904509   -0.005126   -21.00000   -1.20000
AFIX   0
C2C   1    0.526213    1.054720    0.022060   -21.00000    0.02819    0.02568 =
         0.02515   -0.00339    0.00121   -0.00573
AFIX  43
H2C   2    0.519580    1.114284   -0.010131   -21.00000   -1.20000
AFIX   0
C3C   1    0.496446    1.090793    0.067244   -21.00000    0.02873    0.02478 =
         0.02796   -0.00795    0.00246   -0.00174
AFIX  43
H3C   2    0.470426    1.177785    0.067093   -21.00000   -1.20000
AFIX   0
C4C   1    0.504207    1.001351    0.112680   -21.00000    0.02762    0.02758 =
         0.02924   -0.00759    0.00410   -0.00010
AFIX  43
H4C   2    0.483668    1.025848    0.143928   -21.00000   -1.20000
AFIX   0
C5C   1    0.542802    0.873887    0.112095   -21.00000    0.02280    0.02656 =
         0.02896   -0.00459    0.00603   -0.00278
C6C   1    0.545333    0.764834    0.156759   -21.00000    0.02396    0.02852 =
         0.03168   -0.00339    0.00998    0.00254
AFIX  23
H6C1  2    0.550748    0.809474    0.194476   -21.00000   -1.20000
H6C2  2    0.491839    0.712907    0.145240   -21.00000   -1.20000
AFIX   0
C7C   1    0.629289    0.576130    0.203798   -21.00000    0.02845    0.03442 =
         0.03358    0.00155    0.01393    0.00027
C8C   1    0.580722    0.554249    0.247484   -21.00000    0.03458    0.04252 =
         0.03870    0.00712    0.01950    0.00518
AFIX  23
H8C1  2    0.519542    0.548278    0.227867   -21.00000   -1.20000
H8C2  2    0.591755    0.629426    0.276406   -21.00000   -1.20000
AFIX   0
C9C   1    0.616346    0.414144    0.276343   -21.00000    0.03402    0.04450 =
         0.03007    0.00902    0.01667    0.00316
AFIX  13
H9C   2    0.607384    0.396774    0.314775   -21.00000   -1.20000
AFIX   0
C10C  1    0.710468    0.429702    0.278225   -21.00000    0.02994    0.04522 =
         0.03201    0.00817    0.01286    0.00679
C11C  1    0.757895    0.549141    0.313132   -21.00000    0.04798    0.06431 =
         0.03624    0.00158    0.01255    0.00014
AFIX 137
H11D  2    0.746430    0.553416    0.350494   -21.00000   -1.50000
H11E  2    0.739730    0.635059    0.291852   -21.00000   -1.50000
H11F  2    0.818272    0.536375    0.319678   -21.00000   -1.50000
AFIX   0
C12C  1    0.761949    0.298603    0.300623   -21.00000    0.04314    0.06189 =
         0.03565    0.01488    0.01714    0.02200
AFIX 137
H12D  2    0.819084    0.310220    0.298164   -21.00000   -1.50000
H12E  2    0.735286    0.219779    0.276917   -21.00000   -1.50000
H12F  2    0.764210    0.282448    0.341031   -21.00000   -1.50000
AFIX   0
C13C  1    0.582467    0.302652    0.231302   -21.00000    0.03201    0.04038 =
         0.03998    0.00871    0.01222   -0.00115
AFIX  23
H13C  2    0.521007    0.311694    0.213483   -21.00000   -1.20000
H13D  2    0.595251    0.209751    0.248479   -21.00000   -1.20000
AFIX   0
C14C  1    0.630042    0.330496    0.186497   -21.00000    0.03283    0.03666 =
         0.03280    0.00952    0.00659    0.00106
AFIX  23
H14C  2    0.590281    0.353501    0.148179   -21.00000   -1.20000
H14D  2    0.663358    0.249068    0.182289   -21.00000   -1.20000
AFIX   0
C15C  1    0.688366    0.454552    0.211525   -21.00000    0.02674    0.03895 =
         0.03141    0.00845    0.01356    0.00333
C16C  1    0.761354    0.470809    0.186636   -21.00000    0.02528    0.04141 =
         0.03140    0.00737    0.01172    0.00693
AFIX 137
H16D  2    0.806195    0.406328    0.205903   -21.00000   -1.50000
H16E  2    0.782796    0.565215    0.192991   -21.00000   -1.50000
H16F  2    0.742085    0.451357    0.144982   -21.00000   -1.50000
AFIX   0
C17C  1    0.649918    0.406959    0.032694   -21.00000    0.02701    0.02818 =
         0.02870    0.00544    0.00293    0.00150
AFIX  43
H17C  2    0.609474    0.381607    0.051299   -21.00000   -1.20000
AFIX   0
C18C  1    0.669327    0.314332   -0.004318   -21.00000    0.03777    0.02754 =
         0.02606    0.00299    0.00052    0.00077
AFIX  43
H18C  2    0.652167    0.220862   -0.005728   -21.00000   -1.20000
AFIX   0
C19C  1    0.716134    0.364458   -0.040341   -21.00000    0.04070    0.03315 =
         0.02892    0.00435    0.00640    0.00995
AFIX  43
H19C  2    0.719176    0.313682   -0.073188   -21.00000   -1.20000
AFIX   0
C20C  1    0.757122    0.489059   -0.026317   -21.00000    0.03396    0.03641 =
         0.02694    0.00328    0.01147    0.00703
AFIX  43
H20C  2    0.795933    0.518471   -0.045631   -21.00000   -1.20000
AFIX   0
C21C  1    0.741040    0.571719    0.016587   -21.00000    0.03049    0.02884 =
         0.02750    0.00276    0.00905    0.00251
C22C  1    0.781757    0.711091    0.030085   -21.00000    0.02573    0.02865 =
         0.03546    0.00131    0.01326    0.00110
AFIX  23
H22C  2    0.842138    0.703160    0.033383   -21.00000   -1.20000
H22D  2    0.755670    0.774910   -0.002201   -21.00000   -1.20000
AFIX   0
C23C  1    0.819444    0.871964    0.106992   -21.00000    0.02554    0.03213 =
         0.05128   -0.00185    0.00493   -0.00007
C24C  1    0.889093    0.938321    0.085789   -21.00000    0.04349    0.04510 =
         0.05472   -0.00663    0.01349   -0.01512
AFIX  23
H24C  2    0.937993    0.876260    0.091761   -21.00000   -1.20000
H24D  2    0.867881    0.964329    0.044380   -21.00000   -1.20000
AFIX   0
C25C  1    0.911084    1.065317    0.124969   -21.00000    0.04727    0.04411 =
         0.06072   -0.00740    0.01951   -0.01536
AFIX  13
H25C  2    0.964334    1.112843    0.125259   -21.00000   -1.20000
AFIX   0
C26C  1    0.910475    1.004341    0.183771   -21.00000    0.03668    0.03684 =
         0.05737   -0.00835    0.00509   -0.00734
C27C  1    0.963608    0.879035    0.208904   -21.00000    0.05369    0.04942 =
         0.06707   -0.00369   -0.00865    0.00596
AFIX 137
H27D  2    0.944201    0.799881    0.183280   -21.00000   -1.50000
H27E  2    0.958282    0.858538    0.247287   -21.00000   -1.50000
H27F  2    1.022564    0.897978    0.212335   -21.00000   -1.50000
AFIX   0
C28C  1    0.927130    1.112100    0.231472   -21.00000    0.06126    0.03900 =
         0.07000   -0.01038    0.00101   -0.01266
AFIX 137
H28D  2    0.985464    1.143591    0.240891   -21.00000   -1.50000
H28E  2    0.917492    1.071793    0.266039   -21.00000   -1.50000
H28F  2    0.889167    1.190344    0.218220   -21.00000   -1.50000
AFIX   0
C29C  1    0.830486    1.161058    0.110299   -21.00000    0.06474    0.03724 =
         0.06382    0.00507    0.01188   -0.00289
AFIX  23
H29C  2    0.844460    1.253177    0.128048   -21.00000   -1.20000
H29D  2    0.805294    1.171656    0.067915   -21.00000   -1.20000
AFIX   0
C30C  1    0.772162    1.084753    0.136478   -21.00000    0.04243    0.03629 =
         0.06559   -0.00423    0.01151    0.00421
AFIX  23
H30C  2    0.717787    1.066004    0.106825   -21.00000   -1.20000
H30D  2    0.761622    1.138901    0.168234   -21.00000   -1.20000
AFIX   0
C31C  1    0.817940    0.949009    0.159885   -21.00000    0.03646    0.02983 =
         0.05698   -0.00583    0.01138   -0.00765
C32C  1    0.789084    0.876059    0.204459   -21.00000    0.07521    0.03065 =
         0.05686   -0.00906    0.02185   -0.01320
AFIX 137
H32D  2    0.728667    0.857984    0.189191   -21.00000   -1.50000
H32E  2    0.800213    0.933417    0.239257   -21.00000   -1.50000
H32F  2    0.819357    0.788705    0.214302   -21.00000   -1.50000
AFIX   0
N1C   3    0.573862    0.839249    0.068534   -21.00000    0.02215    0.02743 =
         0.02798   -0.00232    0.00337   -0.00375
N2C   3    0.616600    0.667186    0.163554   -21.00000    0.02480    0.02854 =
         0.03415    0.00110    0.01248    0.00317
N3C   3    0.685991    0.532471    0.043674   -21.00000    0.02187    0.02730 =
         0.02463    0.00158    0.00528    0.00091
N4C   3    0.772947    0.768513    0.084637   -21.00000    0.02302    0.02592 =
         0.03502   -0.00059    0.00683   -0.00094

rem constraints
EADP CU2 CU2'
EADP N1B N1D
EADP N2B N2D
EADP C1B C1D
EADP C2B C2D
EADP C3B C3D
EADP C4B C4D
EADP C5B C5D
EADP C6B C6D
EADP C7B C7D
EADP C8B C8D
EADP C9B C8D
EADP C10B C10D
EADP C11B C11D
EADP C12B C12D
EADP C13B C13D
EADP C14B C14D
EADP C15B C15D
EADP C16B C16D
EADP N3B N3D
EADP N4B N4D
EADP C17B C17D
EADP C18B C18D
EADP C19B C19D
EADP C20B C20D
EADP C21B C21D
EADP C22B C22D
EADP C23B C23D
EADP C24B C24D
EADP C25B C25D
EADP C26B C26D
EADP C27B C27D
EADP C28B C28D
EADP C29B C29D
EADP C30B C30D
EADP C31B C31D
EADP C32B C32D

rem restraints
SIMU 0.01 CU2 > N4D

PART 1
CU2   6    0.677654    0.683736    0.602098    31.00000    0.02656    0.03619 =
         0.03957   -0.00228    0.01466   -0.00091
C1B   1    0.573438    0.916299    0.529729    31.00000    0.02810    0.03861 =
         0.04999    0.00851    0.01508    0.00173
AFIX  43
H1B   2    0.590965    0.883830    0.498189    31.00000   -1.20000
AFIX   0
C2B   1    0.533038    1.042693    0.525915    31.00000    0.03177    0.03558 =
         0.05995    0.00685    0.02096    0.00055
AFIX  43
H2B   2    0.520578    1.094911    0.491175    31.00000   -1.20000
AFIX   0
C3B   1    0.511530    1.090955    0.572118    31.00000    0.03211    0.03181 =
         0.06751    0.00620    0.02761   -0.00234
AFIX  43
H3B   2    0.486032    1.178923    0.570238    31.00000   -1.20000
AFIX   0
C4B   1    0.526730    1.011763    0.622534    31.00000    0.03365    0.02996 =
         0.06534    0.00539    0.02861   -0.00249
AFIX  43
H4B   2    0.512571    1.045117    0.655293    31.00000   -1.20000
AFIX   0
C5B   1    0.563457    0.881795    0.623268    31.00000    0.03044    0.03261 =
         0.05540    0.00261    0.02354   -0.00133
C6B   1    0.580122    0.788781    0.675025    31.00000    0.03250    0.02730 =
         0.04920   -0.00483    0.02253   -0.00607
AFIX  23
H6B1  2    0.600798    0.844505    0.710742    31.00000   -1.20000
H6B2  2    0.526854    0.744646    0.675421    31.00000   -1.20000
AFIX   0
C7B   1    0.657637    0.593691    0.716413    31.00000    0.02937    0.03409 =
         0.03811   -0.00206    0.01283   -0.00659
C8B   1    0.617571    0.592554    0.765091    31.00000    0.03608    0.04292 =
         0.04260    0.00102    0.01948   -0.00627
AFIX  23
H8B1  2    0.555831    0.581918    0.749921    31.00000   -1.20000
H8B2  2    0.630968    0.677463    0.788683    31.00000   -1.20000
AFIX   0
C9B   1    0.658971    0.465480    0.800094    31.00000    0.03608    0.04292 =
         0.04260    0.00102    0.01948   -0.00627
AFIX  13
H9B   2    0.655560    0.463144    0.840629    31.00000   -1.20000
AFIX   0
C10B  1    0.749495    0.479783    0.795979    31.00000    0.03767    0.05236 =
         0.04146    0.00704    0.01161   -0.00717
C11B  1    0.794995    0.612885    0.819522    31.00000    0.04463    0.08534 =
         0.03978   -0.00314    0.01148   -0.01035
AFIX 137
H11G  2    0.801720    0.619879    0.861066    31.00000   -1.50000
H11H  2    0.762171    0.691355    0.799269    31.00000   -1.50000
H11I  2    0.850405    0.613165    0.813394    31.00000   -1.50000
AFIX   0
C12B  1    0.806039    0.358704    0.824131    31.00000    0.05103    0.08314 =
         0.05142    0.02547    0.01569    0.00785
AFIX 137
H12G  2    0.857115    0.359909    0.812145    31.00000   -1.50000
H12H  2    0.775910    0.272060    0.811847    31.00000   -1.50000
H12I  2    0.821219    0.366786    0.866387    31.00000   -1.50000
AFIX   0
C13B  1    0.623199    0.338255    0.764397    31.00000    0.03900    0.04171 =
         0.05045    0.00846    0.01150   -0.00957
AFIX  23
H13E  2    0.561287    0.343510    0.748360    31.00000   -1.20000
H13F  2    0.638749    0.253119    0.787623    31.00000   -1.20000
AFIX   0
C14B  1    0.666569    0.345288    0.715112    31.00000    0.03591    0.03491 =
         0.04816    0.00409    0.00719   -0.00445
AFIX  23
H14E  2    0.702140    0.263206    0.716227    31.00000   -1.20000
H14F  2    0.623985    0.350626    0.676539    31.00000   -1.20000
AFIX   0
C15B  1    0.720527    0.477073    0.727712    31.00000    0.03094    0.03933 =
         0.03736    0.00216    0.01215   -0.00510
C16B  1    0.790088    0.487157    0.699528    31.00000    0.02778    0.03267 =
         0.03752   -0.00134    0.00958   -0.00479
AFIX 137
H16G  2    0.765609    0.486435    0.657296    31.00000   -1.50000
H16H  2    0.828218    0.408649    0.711531    31.00000   -1.50000
H16I  2    0.821379    0.572901    0.711546    31.00000   -1.50000
AFIX   0
C17B  1    0.633703    0.415837    0.532683    31.00000    0.02670    0.03167 =
         0.04036    0.00283    0.01170   -0.00006
AFIX  43
H17B  2    0.594780    0.397859    0.553461    31.00000   -1.20000
AFIX   0
C18B  1    0.639196    0.324815    0.490784    31.00000    0.02655    0.03364 =
         0.04416   -0.00149    0.00688   -0.00016
AFIX  43
H18B  2    0.608786    0.240720    0.485022    31.00000   -1.20000
AFIX   0
C19B  1    0.690126    0.358366    0.457058    31.00000    0.02808    0.04601 =
         0.03577   -0.00846    0.00508    0.00110
AFIX  43
H19B  2    0.695703    0.296618    0.428011    31.00000   -1.20000
AFIX   0
C20B  1    0.732654    0.481571    0.465787    31.00000    0.02365    0.04898 =
         0.02933   -0.00340    0.00485   -0.00175
AFIX  43
H20B  2    0.764791    0.508571    0.441218    31.00000   -1.20000
AFIX   0
C21B  1    0.727940    0.566215    0.511163    31.00000    0.02803    0.03926 =
         0.02944    0.00215    0.00914   -0.00240
C22B  1    0.786646    0.688098    0.527598    31.00000    0.03220    0.03790 =
         0.04126    0.00405    0.01602   -0.00427
AFIX  23
H22E  2    0.845248    0.655567    0.535698    31.00000   -1.20000
H22F  2    0.774840    0.752347    0.494370    31.00000   -1.20000
AFIX   0
C23B  1    0.821293    0.872963    0.590756    31.00000    0.02600    0.03277 =
         0.06389   -0.00151    0.00671    0.00120
C24B  1    0.882231    0.923119    0.557797    31.00000    0.04066    0.04066 =
         0.07887    0.00215    0.01101   -0.00824
AFIX  23
H24E  2    0.928571    0.857098    0.561000    31.00000   -1.20000
H24F  2    0.852759    0.941787    0.516449    31.00000   -1.20000
AFIX   0
C25B  1    0.913098    1.055905    0.591995    31.00000    0.04511    0.04034 =
         0.08824    0.00498    0.00114   -0.00992
AFIX  13
H25B  2    0.966814    1.091292    0.587129    31.00000   -1.20000
AFIX   0
C26B  1    0.920764    1.015966    0.653879    31.00000    0.04330    0.03757 =
         0.08455   -0.00167   -0.00391   -0.00926
C27B  1    0.980590    0.899724    0.680230    31.00000    0.03823    0.05808 =
         0.11596    0.01160   -0.00339    0.00399
AFIX 137
H27G  2    0.970640    0.822248    0.653088    31.00000   -1.50000
H27H  2    0.971188    0.870028    0.716474    31.00000   -1.50000
H27I  2    1.038626    0.931731    0.688169    31.00000   -1.50000
AFIX   0
C28B  1    0.945057    1.141962    0.694116    31.00000    0.07141    0.04413 =
         0.08477    0.00050   -0.01351   -0.01720
AFIX 137
H28G  2    1.006380    1.148370    0.709252    31.00000   -1.50000
H28H  2    0.921481    1.132032    0.726408    31.00000   -1.50000
H28I  2    0.922762    1.225614    0.672277    31.00000   -1.50000
AFIX   0
C29B  1    0.841673    1.162723    0.576027    31.00000    0.05519    0.04363 =
         0.09455    0.00222    0.00111   -0.00003
AFIX  23
H29E  2    0.862025    1.254852    0.591453    31.00000   -1.20000
H29F  2    0.815945    1.168974    0.533532    31.00000   -1.20000
AFIX   0
C30B  1    0.782218    1.106768    0.604216    31.00000    0.04764    0.05024 =
         0.09351   -0.01251    0.00609    0.00315
AFIX  23
H30E  2    0.728668    1.081380    0.574974    31.00000   -1.20000
H30F  2    0.770412    1.175267    0.631026    31.00000   -1.20000
AFIX   0
C31B  1    0.826992    0.973003    0.639177    31.00000    0.04007    0.03975 =
         0.07573   -0.00720    0.00460   -0.00343
C32B  1    0.794216    0.919463    0.684142    31.00000    0.07470    0.07203 =
         0.06635   -0.02441    0.01448   -0.01942
AFIX 137
H32G  2    0.736500    0.887223    0.666629    31.00000   -1.50000
H32H  2    0.794730    0.992399    0.712207    31.00000   -1.50000
H32I  2    0.829322    0.842674    0.703903    31.00000   -1.50000
AFIX   0
N1B   3    0.587686    0.839972    0.578196    31.00000    0.02743    0.03742 =
         0.04935    0.00418    0.01580   -0.00005
N2B   3    0.643085    0.679863    0.675033    31.00000    0.02934    0.02728 =
         0.04002   -0.00290    0.01600   -0.00791
N3B   3    0.681959    0.530985    0.545598    31.00000    0.02684    0.03235 =
         0.02872    0.00354    0.00727   -0.00030
N4B   3    0.778562    0.762528    0.578624    31.00000    0.02553    0.03061 =
         0.04359   -0.00233    0.01186   -0.00301

PART 2
SAME CU2 > N4B
CU2'  6    0.668463    0.678701    0.598274   -31.00000    0.02656    0.03619 =
         0.03957   -0.00228    0.01466   -0.00091
C1D   1    0.567534    0.934805    0.536616   -31.00000    0.02810    0.03861 =
         0.04999    0.00851    0.01508    0.00173
AFIX  43
H1D   2    0.585563    0.914260    0.503866   -31.00000   -1.20000
AFIX   0
C2D   1    0.527534    1.059945    0.537498   -31.00000    0.03177    0.03558 =
         0.05995    0.00685    0.02096    0.00055
AFIX  43
H2D   2    0.516118    1.120489    0.505241   -31.00000   -1.20000
AFIX   0
C3D   1    0.504878    1.094548    0.585492   -31.00000    0.03211    0.03181 =
         0.06751    0.00620    0.02761   -0.00234
AFIX  43
H3D   2    0.478749    1.180360    0.587681   -31.00000   -1.20000
AFIX   0
C4D   1    0.521126    1.000483    0.631277   -31.00000    0.03365    0.02996 =
         0.06534    0.00539    0.02861   -0.00249
AFIX  43
H4D   2    0.506868    1.022049    0.665433   -31.00000   -1.20000
AFIX   0
C5D   1    0.558652    0.874138    0.626200   -31.00000    0.03044    0.03261 =
         0.05540    0.00261    0.02354   -0.00133
C6D   1    0.567620    0.765975    0.671769   -31.00000    0.03250    0.02730 =
         0.04920   -0.00483    0.02253   -0.00607
AFIX  23
H6D1  2    0.582808    0.810459    0.710337   -31.00000   -1.20000
H6D2  2    0.512986    0.719040    0.665562   -31.00000   -1.20000
AFIX   0
C7D   1    0.646235    0.570458    0.710851   -31.00000    0.02937    0.03409 =
         0.03811   -0.00206    0.01283   -0.00659
C8D   1    0.601455    0.556902    0.756579   -31.00000    0.03608    0.04292 =
         0.04260    0.00102    0.01948   -0.00627
AFIX  23
H8D1  2    0.539885    0.549323    0.738939   -31.00000   -1.20000
H8D2  2    0.614190    0.635329    0.783947   -31.00000   -1.20000
AFIX   0
C9D   1    0.640200    0.419675    0.786842   -31.00000    0.03678    0.05231 =
         0.04350    0.00611    0.01561   -0.01051
AFIX  13
H9D   2    0.633901    0.406023    0.826274   -31.00000   -1.20000
AFIX   0
C10D  1    0.732371    0.433673    0.786117   -31.00000    0.03767    0.05236 =
         0.04146    0.00704    0.01161   -0.00717
C11D  1    0.780359    0.555552    0.819072   -31.00000    0.04463    0.08534 =
         0.03978   -0.00314    0.01148   -0.01035
AFIX 137
H11J  2    0.777632    0.554115    0.858951   -31.00000   -1.50000
H11K  2    0.755337    0.641083    0.800125   -31.00000   -1.50000
H11L  2    0.839142    0.550278    0.819452   -31.00000   -1.50000
AFIX   0
C12D  1    0.783739    0.302365    0.808596   -31.00000    0.05103    0.08314 =
         0.05142    0.02547    0.01569    0.00785
AFIX 137
H12J  2    0.839781    0.311454    0.803889   -31.00000   -1.50000
H12K  2    0.755122    0.222675    0.786491   -31.00000   -1.50000
H12L  2    0.788951    0.289536    0.849692   -31.00000   -1.50000
AFIX   0
C13D  1    0.604349    0.302934    0.744285   -31.00000    0.03900    0.04171 =
         0.05045    0.00846    0.01150   -0.00957
AFIX  23
H13G  2    0.542589    0.310796    0.727887   -31.00000   -1.20000
H13H  2    0.618448    0.211957    0.763107   -31.00000   -1.20000
AFIX   0
C14D  1    0.648453    0.324837    0.697010   -31.00000    0.03591    0.03491 =
         0.04816    0.00409    0.00719   -0.00445
AFIX  23
H14G  2    0.606900    0.344301    0.658972   -31.00000   -1.20000
H14H  2    0.681541    0.242669    0.693352   -31.00000   -1.20000
AFIX   0
C15D  1    0.706972    0.451422    0.718921   -31.00000    0.03094    0.03933 =
         0.03736    0.00216    0.01215   -0.00510
C16D  1    0.777483    0.462409    0.692262   -31.00000    0.02778    0.03267 =
         0.03752   -0.00134    0.00958   -0.00479
AFIX 137
H16J  2    0.754418    0.459227    0.649955   -31.00000   -1.50000
H16K  2    0.816558    0.385586    0.705599   -31.00000   -1.50000
H16L  2    0.807326    0.549560    0.703895   -31.00000   -1.50000
AFIX   0
C17D  1    0.645220    0.405036    0.530533   -31.00000    0.02670    0.03167 =
         0.04036    0.00283    0.01170   -0.00006
AFIX  43
H17D  2    0.611305    0.374296    0.553331   -31.00000   -1.20000
AFIX   0
C18D  1    0.655748    0.318178    0.488411   -31.00000    0.02655    0.03364 =
         0.04416   -0.00149    0.00688   -0.00016
AFIX  43
H18D  2    0.625401    0.234166    0.480058   -31.00000   -1.20000
AFIX   0
C19D  1    0.711163    0.354734    0.458316   -31.00000    0.02808    0.04601 =
         0.03577   -0.00846    0.00508    0.00110
AFIX  43
H19D  2    0.719320    0.297223    0.428729   -31.00000   -1.20000
AFIX   0
C20D  1    0.753836    0.476392    0.472544   -31.00000    0.02365    0.04898 =
         0.02933   -0.00340    0.00485   -0.00175
AFIX  43
H20D  2    0.795098    0.501729    0.454647   -31.00000   -1.20000
AFIX   0
C21D  1    0.736353    0.562966    0.513499   -31.00000    0.02803    0.03926 =
         0.02944    0.00215    0.00914   -0.00240
C22D  1    0.774175    0.705661    0.523135   -31.00000    0.03220    0.03790 =
         0.04126    0.00405    0.01602   -0.00427
AFIX  23
H22G  2    0.832961    0.701594    0.522108   -31.00000   -1.20000
H22H  2    0.742404    0.766932    0.491416   -31.00000   -1.20000
AFIX   0
C23D  1    0.818631    0.869608    0.595071   -31.00000    0.02600    0.03277 =
         0.06389   -0.00151    0.00671    0.00120
C24D  1    0.867320    0.945385    0.558629   -31.00000    0.04066    0.04066 =
         0.07887    0.00215    0.01101   -0.00824
AFIX  23
H24G  2    0.829815    0.973219    0.520189   -31.00000   -1.20000
H24H  2    0.913984    0.888875    0.553621   -31.00000   -1.20000
AFIX   0
C25D  1    0.899973    1.071698    0.598534   -31.00000    0.04511    0.04034 =
         0.08824    0.00498    0.00114   -0.00992
AFIX  13
H25D  2    0.948174    1.120397    0.590672   -31.00000   -1.20000
AFIX   0
C26D  1    0.920584    1.010040    0.658562   -31.00000    0.04330    0.03757 =
         0.08455   -0.00167   -0.00391   -0.00926
C27D  1    0.987419    0.898906    0.669417   -31.00000    0.03823    0.05808 =
         0.11596    0.01160   -0.00339    0.00399
AFIX 137
H27J  2    0.964329    0.817513    0.646165   -31.00000   -1.50000
H27K  2    1.005323    0.874240    0.710586   -31.00000   -1.50000
H27L  2    1.035756    0.933214    0.658509   -31.00000   -1.50000
AFIX   0
C28D  1    0.944917    1.117283    0.707801   -31.00000    0.07141    0.04413 =
         0.08477    0.00050   -0.01351   -0.01720
AFIX 137
H28J  2    0.950022    1.071916    0.744865   -31.00000   -1.50000
H28K  2    0.901443    1.188508    0.700731   -31.00000   -1.50000
H28L  2    0.998742    1.159550    0.709085   -31.00000   -1.50000
AFIX   0
C29D  1    0.822880    1.163404    0.592560   -31.00000    0.05519    0.04363 =
         0.09455    0.00222    0.00111   -0.00003
AFIX  23
H29G  2    0.839581    1.255892    0.609191   -31.00000   -1.20000
H29H  2    0.788697    1.173070    0.551514   -31.00000   -1.20000
AFIX   0
C30D  1    0.776294    1.085657    0.626691   -31.00000    0.04764    0.05024 =
         0.09351   -0.01251    0.00609    0.00315
AFIX  23
H30G  2    0.719290    1.060794    0.601915   -31.00000   -1.20000
H30H  2    0.771201    1.141509    0.659675   -31.00000   -1.20000
AFIX   0
C31D  1    0.830584    0.951652    0.649127   -31.00000    0.04007    0.03975 =
         0.07573   -0.00720    0.00460   -0.00343
C32D  1    0.812202    0.883629    0.697971   -31.00000    0.07470    0.07203 =
         0.06635   -0.02441    0.01448   -0.01942
AFIX 137
H32J  2    0.752074    0.862666    0.687554   -31.00000   -1.50000
H32K  2    0.827710    0.944674    0.731762   -31.00000   -1.50000
H32L  2    0.844530    0.798055    0.707263   -31.00000   -1.50000
AFIX   0
N1D   3    0.582212    0.840982    0.579513   -31.00000    0.02743    0.03742 =
         0.04935    0.00418    0.01580   -0.00005
N2D   3    0.632858    0.661777    0.670946   -31.00000    0.02934    0.02728 =
         0.04002   -0.00290    0.01600   -0.00791
N3D   3    0.680295    0.531967    0.541540   -31.00000    0.02684    0.03235 =
         0.02872    0.00354    0.00727   -0.00030
N4D   3    0.772590    0.763440    0.579235   -31.00000    0.02553    0.03061 =
         0.04359   -0.00233    0.01186   -0.00301

rem counterions

PART 0
P1    5    0.643426    0.955079    0.375623    11.00000    0.05818    0.03485 =
         0.04335    0.00062    0.02006   -0.00660
F1    4    0.605691    0.923551    0.308850    11.00000    0.12492    0.07586 =
         0.05038   -0.01689    0.01863   -0.00989
F2    4    0.733163    0.959941    0.369723    11.00000    0.06913    0.20531 =
         0.11632   -0.03040    0.05073   -0.02518
F3    4    0.681908    0.989532    0.443532    11.00000    0.08522    0.05654 =
         0.04717    0.00156    0.01180   -0.00384
F4    4    0.552305    0.952682    0.383655    11.00000    0.06447    0.13461 =
         0.09818    0.00065    0.03724   -0.00232
F5    4    0.631272    1.113818    0.362175    11.00000    0.17361    0.04665 =
         0.05473    0.00457    0.01733   -0.01500
F6    4    0.651153    0.796919    0.389361    11.00000    0.13487    0.04224 =
         0.09414    0.00380    0.01216   -0.00189

rem restraints
SIMU 0.01 P2 > F12'

PART 1
P2    5    0.678046    0.953259    0.888805    41.00000    0.05432    0.03964 =
         0.05168    0.00009    0.01844   -0.00142
F7    4    0.646896    0.912924    0.822528    41.00000    0.06578    0.08157 =
         0.04598   -0.00698    0.00027   -0.00027
F8    4    0.718718    0.995413    0.955757    41.00000    0.05882    0.05248 =
         0.05716   -0.00724   -0.00130   -0.00157
F9    4    0.724485    1.083827    0.873924    41.00000    0.09112    0.05575 =
         0.05534    0.00973    0.01233   -0.02573
F10   4    0.597194    1.043254    0.885173    41.00000    0.07278    0.07581 =
         0.08307   -0.00645    0.00855    0.03515
F11   4    0.759752    0.867106    0.895352    41.00000    0.06739    0.07279 =
         0.06159    0.00234    0.02645    0.01749
F12   4    0.637227    0.820453    0.906850    41.00000    0.08138    0.05960 =
         0.08341    0.00374    0.03469   -0.03201

PART 2
SAME P2 > F12
P2'   5    0.663010    0.956027    0.882899   -41.00000    0.04138    0.03145 =
         0.03564   -0.00105    0.01330   -0.00649
F7'   4    0.624987    0.929509    0.814942   -41.00000    0.05921    0.06153 =
         0.03752   -0.00882    0.00631   -0.00255
F8'   4    0.696858    0.986111    0.951191   -41.00000    0.06151    0.04905 =
         0.03280   -0.00125    0.01190   -0.00300
F9'   4    0.655490    1.116813    0.869971   -41.00000    0.10623    0.04034 =
         0.05157    0.00460    0.01284   -0.00663
F10'  4    0.569523    0.956302    0.887892   -41.00000    0.04755    0.09559 =
         0.06892    0.00457    0.02549   -0.00474
F11'  4    0.754503    0.956303    0.878895   -41.00000    0.04288    0.11331 =
         0.07445   -0.00982    0.02740   -0.00804
F12'  4    0.667425    0.795133    0.895860   -41.00000    0.09690    0.03693 =
         0.06590    0.00080    0.00958   -0.00331

PART 0
rem lattice solvent molecules
C1S   1    0.978174    0.262031    1.003586    11.00000    0.20284    0.23208 =
         0.21195   -0.14646    0.16784   -0.12243
AFIX 137
H1S1  2    1.036020    0.234730    1.024050    11.00000   -1.50000
H1S2  2    0.945180    0.264183    1.030904    11.00000   -1.50000
H1S3  2    0.978165    0.353638    0.986658    11.00000   -1.50000
AFIX   0
C2S   1    0.940673    0.161717    0.957011    11.00000    0.07441    0.11544 =
         0.09457    0.02533    0.05260    0.01194
AFIX  23
H2S1  2    0.923136    0.078215    0.973760    11.00000   -1.20000
H2S2  2    0.890298    0.202281    0.928948    11.00000   -1.20000
AFIX   0
O1S   7    0.998940    0.126758    0.928918    11.00000    0.05551    0.09557 =
         0.11030   -0.02262    0.03884   -0.01231
C3S   1    0.967214    0.033919    0.881992    11.00000    0.07403    0.07279 =
         0.07748    0.00255    0.01728   -0.00615
AFIX  23
H3S1  2    0.923012    0.079166    0.850506    11.00000   -1.20000
H3S2  2    0.942532   -0.047875    0.895055    11.00000   -1.20000
AFIX   0
C4S   1    1.038044   -0.007366    0.861049    11.00000    0.14666    0.08463 =
         0.08308    0.00865    0.02945    0.04702
AFIX 137
H4S1  2    1.061713    0.074256    0.847993    11.00000   -1.50000
H4S2  2    1.018064   -0.071871    0.828689    11.00000   -1.50000
H4S3  2    1.081399   -0.051902    0.892555    11.00000   -1.50000

AFIX   0
HKLF 4

REM  xs0883a in P2(1)
REM R1 =  0.0404 for   11068 Fo > 4sig(Fo)  and  0.0463 for all   12437 data
REM   1149 parameters refined using   2854 restraints

END

WGHT      0.0488      1.6955

REM Instructions for potential hydrogen bonds
HTAB C6A F1
EQIV $1 -x+1, y-1/2, -z+1
HTAB C6A F10_$1
EQIV $2 -x+2, y+1/2, -z+1
HTAB C22A O1S_$2
EQIV $3 x, y, z-1
HTAB C22A F8_$3
HTAB C24A F8_$3
HTAB C1C F8'_$3
HTAB C1C F10'_$3
HTAB C6C F9'_$1
HTAB C8C F7'_$1
HTAB C22C O1S_$2
HTAB C22C F8'_$3
HTAB C22C F12'_$3
HTAB C1B F3
HTAB C8B F7
HTAB C1D F3
HTAB C6D F5_$1
HTAB C22D F3
HTAB C22D F6
HTAB C24D F3

REM Highest difference peak  0.416,  deepest hole -0.276,  1-sigma level  0.045
Q1    1   0.7023  1.0804  0.3708  11.00000  0.05    0.42
Q2    1   0.5827  1.0619  0.3762  11.00000  0.05    0.38
Q3    1   0.7133  0.8412  0.3862  11.00000  0.05    0.38
Q4    1   0.8684  1.0168  0.6917  11.00000  0.05    0.34
Q5    1   0.5908  0.8548  0.3906  11.00000  0.05    0.31
Q6    1   0.7223  0.8224  0.8925  11.00000  0.05    0.29
Q7    1   1.0031  0.6502  0.5720  11.00000  0.05    0.28
Q8    1   0.8854  0.9364  0.1381  11.00000  0.05    0.27
Q9    1   0.9445  1.1779  0.6378  11.00000  0.05    0.25
Q10   1   0.8711  1.0893  0.6308  11.00000  0.05    0.24
;
_shelx_res_checksum   25246

_shelx_hkl_file
;
   0  -8   0 40880.1 1359.18   1
   0  -8   1 869.751 205.949   1
   0  -8  -1 325.872 93.4971   1
   0  -8   2 793.748 191.306   1
   0  -8   3 67.3108 59.2319   1
   0  -8   4-32.6521 151.587   1
   0  -8   5-227.507 115.779   1
   0  -7   0-46.8593 100.409   1
   0  -7  -1 238.358 164.684   1
   0  -7   1-12.3348 107.422   1
   0  -7  -2 3786.66 388.727   1
   0  -7   2 4695.17 435.012   1
   0  -7  -3-611.846 157.995   1
   0  -7   3 197.750 147.278   1
   0  -7   4 15835.4 813.569   1
   0  -7  -4 16201.7 789.914   1
   0  -7  -5 622.482 122.469   1
   0  -7   5 530.550 161.554   1
   0  -7  -6 7993.73 536.621   1
   0  -7  -7 694.873 152.591   1
   0  -7  -8 2635.53 296.081   1
   0  -6   0 26143.1 909.803   1
   0  -6   1 204.728 111.560   1
   0  -6  -1-21.0138 83.1675   1
   0  -6   2 20700.8 817.866   1
   0  -6  -2 20012.3 805.966   1
   0  -6  -3 205.277 112.543   1
   0  -6   3 329.007 104.663   1
   0  -6  -4 19165.3 797.261   1
   0  -6  -5-17.1193 82.1657   1
   0  -6  -6 12826.5 646.181   1
   0  -6  -7 371.661 125.626   1
   0  -6   8 2148.04 246.530   3
   0  -6  -8 1702.21 219.553   1
   0  -6   9 478.008 114.908   3
   0  -6  -9 231.961 107.264   1
   0  -6 -10 2216.67 249.083   1
   0  -6  10 2400.56 268.133   3
   0  -6 -11 1485.80 230.240   1
   0  -6  11 998.990 188.331   3
   0  -6  12 7675.44 523.226   3
   0  -6 -12 7869.40 486.660   1
   0  -6  13 231.282 97.2369   3
   0  -6 -16 12346.3 447.947   8
   0  -6 -17 326.911 79.2622   8
   0  -6 -18 1435.17 158.653   8
   0  -6 -19 283.085 73.1652   8
   0  -6 -20 8607.11 358.213   8
   0  -6 -21 170.384 53.8386   8
   0  -6 -22 2188.42 162.302   8
   0  -6 -23 503.254 72.7511   8
   0  -6 -24 251.006 50.3991   8
   0  -5   0-8.60218 49.8835   1
   0  -5   1 618.855 132.453   1
   0  -5  -1 444.870 121.803   1
   0  -5  -2 161517. 2007.81   1
   0  -5   3 134.236 52.3204   3
   0  -5  -3 64.0087 65.1169   1
   0  -5  -4 36940.8 988.879   1
   0  -5   4 36938.1 758.475   3
   0  -5   5 1196.05 158.757   3
   0  -5  -5 1336.79 200.889   1
   0  -5   6 43989.2 946.200   3
   0  -5  -6 41295.7 1055.52   1
   0  -5   7 383.441 100.627   3
   0  -5  -7 446.172 104.915   1
   0  -5  -8 51147.5 1171.47   1
   0  -5   8 52168.5 1154.81   3
   0  -5  -9 5.41921 62.2317   1
   0  -5   9 37.1332 48.5344   3
   0  -5 -10 822.515 145.830   1
   0  -5  10 1206.26 195.315   3
   0  -5 -11 9.70010 86.5838   1
   0  -5  11-55.8211 45.9332   3
   0  -5 -12 17711.7 709.654   1
   0  -5  12 18985.7 822.274   3
   0  -5  13 258.061 97.9137   3
   0  -5 -13 260.035 97.7284   1
   0  -5 -14 3247.03 312.567   1
   0  -5 -14 4016.01 257.153   8
   0  -5  14 3427.56 375.327   3
   0  -5 -15 1236.41 151.619   8
   0  -5  15 1462.74 245.276   3
   0  -5 -16 21274.0 631.589   8
   0  -5 -17 1124.22 153.992   8
   0  -5 -18 10121.0 447.269   8
   0  -5 -19 2449.18 220.144   8
   0  -5 -20 1135.71 154.287   8
   0  -5 -21 326.693 80.5260   8
   0  -5 -22 1151.92 143.104   8
   0  -5 -23 47.7775 44.9273   8
   0  -5 -24 507.063 87.8993   8
   0  -5 -25 69.3817 37.2040   8
   0  -4   0 68386.2 620.569   3
   0  -4   0 65611.2 1088.23   1
   0  -4  -1 14.4270 44.2755   1
   0  -4   1 17.5284 25.5169   3
   0  -4   2 5256.15 232.242   3
   0  -4  -2 5065.04 309.586   1
   0  -4  -3 517.969 113.159   1
   0  -4   3 521.348 86.8032   3
   0  -4  -4 68746.4 1198.50   1
   0  -4   4 67901.3 984.655   3
   0  -4   5 163.004 70.5563   3
   0  -4  -5 280.151 96.0423   1
   0  -4  -6 14504.1 562.955   1
   0  -4   6 15741.7 546.630   3
   0  -4   7 1143.04 160.089   3
   0  -4  -7 1041.39 151.343   1
   0  -4   8 4378.60 318.974   3
   0  -4  -8 3968.77 299.872   1
   0  -4   9 70.6718 53.3133   3
   0  -4  -9 85.3587 67.1262   1
   0  -4  10 28929.0 911.937   3
   0  -4 -10 27652.7 811.346   1
   0  -4 -11 6466.95 401.298   1
   0  -4  11 6067.33 435.752   3
   0  -4  12 8582.00 538.927   3
   0  -4 -12 7704.62 450.371   1
   0  -4 -13 213.977 75.0900   1
   0  -4  13 359.678 106.357   3
   0  -4  14 10935.8 652.168   3
   0  -4 -14 10909.9 560.729   1
   0  -4 -15 893.041 153.499   1
   0  -4  15 826.489 179.258   3
   0  -4 -16 11034.9 587.907   1
   0  -4 -16 11037.2 457.237   8
   0  -4 -16 11510.7 434.651   7
   0  -4  16 12149.9 725.711   3
   0  -4 -17 1679.42 222.465   1
   0  -4  17 2166.67 320.436   3
   0  -4 -17 1738.91 173.784   7
   0  -4 -17 1940.98 197.598   8
   0  -4 -18 2828.05 249.239   8
   0  -4 -18 3218.09 246.334   7
   0  -4 -19 718.337 128.854   8
   0  -4 -19 711.605 128.190   7
   0  -4 -20 214.378 73.5183   7
   0  -4 -20 140.783 84.2926   8
   0  -4 -21 754.833 130.469   8
   0  -4 -21 882.294 139.116   7
   0  -4 -22 631.486 124.453   8
   0  -4 -22 689.402 121.007   7
   0  -4 -23 162.031 61.9546   8
   0  -4 -23 201.155 69.3633   7
   0  -4 -24 673.977 98.2597   7
   0  -4 -24 811.814 120.732   8
   0  -4 -25 126.152 45.9744   8
   0  -4 -25 209.187 52.0212   7
   0  -4 -26 861.086 99.2333   8
   0  -4 -26 713.596 72.9062   7
   0  -3   0-2.69742 13.6258   3
   0  -3   1 308.361 52.4053   3
   0  -3  -1 391.939 37.7500   3
   0  -3  -1 329.561 68.7656   1
   0  -3   2 44365.7 620.998   3
   0  -3  -2 45230.6 776.951   1
   0  -3  -3 206.063 77.2333   1
   0  -3   3 170.825 52.3185   3
   0  -3  -4 2309.96 196.126   1
   0  -3   4 2183.06 169.599   3
   0  -3   5 641.551 104.484   3
   0  -3  -5 654.623 112.962   1
   0  -3   6 31772.6 725.567   3
   0  -3  -6 31877.5 731.185   1
   0  -3   7 1041.25 146.364   3
   0  -3  -7 1277.88 156.562   1
   0  -3   8 5845.93 348.750   3
   0  -3  -8 5896.45 331.932   1
   0  -3  -9 5488.47 326.908   1
   0  -3   9 5082.36 344.312   3
   0  -3 -10 13155.6 512.256   1
   0  -3  10 13133.6 576.505   3
   0  -3  11 3997.19 338.434   3
   0  -3 -11 4379.00 310.289   1
   0  -3  12 29245.3 948.540   3
   0  -3 -12 28597.8 817.366   1
   0  -3  13 616.892 154.009   3
   0  -3 -13 698.516 137.969   1
   0  -3 -14 44012.0 1090.98   1
   0  -3  14 47549.8 1315.75   3
   0  -3  15 1540.79 258.093   3
   0  -3 -15 1532.27 215.349   1
   0  -3 -16 3786.37 348.851   1
   0  -3 -16 3515.82 321.355   2
   0  -3  16 3709.02 388.452   3
   0  -3  17 4769.39 463.741   3
   0  -3 -17 4559.21 377.367   2
   0  -3 -17 4725.60 296.919   7
   0  -3 -17 4555.64 300.528   8
   0  -3 -17 5492.56 431.620   1
   0  -3  18 15921.0 844.464   3
   0  -3 -18 15019.1 723.637   1
   0  -3 -18 17136.7 603.075   8
   0  -3 -18 15046.7 693.691   2
   0  -3 -18 16454.5 568.403   7
   0  -3 -19 646.812 127.552   8
   0  -3 -19 561.756 120.892   7
   0  -3 -20 2245.65 230.377   8
   0  -3 -20 2377.64 222.511   7
   0  -3 -21 756.911 137.996   8
   0  -3 -21 805.627 135.025   7
   0  -3 -22 1947.44 208.173   8
   0  -3 -22 1521.72 182.292   7
   0  -3 -23 454.814 104.694   7
   0  -3 -23 403.005 106.296   8
   0  -3 -24 1534.38 164.538   7
   0  -3 -24 1371.36 164.104   8
   0  -3 -25 1073.53 126.521   7
   0  -3 -25 1273.93 147.853   8
   0  -3 -26 1491.62 144.276   8
   0  -3 -26 1299.52 127.107   7
   0  -3 -27 485.714 77.4816   8
   0  -3 -27 447.516 66.7807   7
   0  -2   0 433833. 1234.29   3
   0  -2  -1 1136.40 97.1425   1
   0  -2  -1 1146.90 49.1079   3
   0  -2   1 1196.11 79.6360   3
   0  -2   2 44737.5 555.905   3
   0  -2  -2 44089.0 629.176   1
   0  -2   3 1757.37 126.751   3
   0  -2  -3 1942.27 148.120   1
   0  -2   4 23620.5 497.744   3
   0  -2  -4 24037.9 521.583   1
   0  -2  -5 275.104 65.8817   1
   0  -2   5 234.218 62.5622   3
   0  -2  -6 80549.4 1008.89   1
   0  -2   6 81927.8 1075.97   3
   0  -2   7 353.512 80.7090   3
   0  -2  -7 451.659 90.5329   1
   0  -2  -8 12266.0 426.630   1
   0  -2   8 12625.5 484.849   3
   0  -2  -9 3882.98 254.648   1
   0  -2   9 3048.48 254.333   3
   0  -2 -10 42194.6 861.402   1
   0  -2  10 43073.0 998.429   3
   0  -2 -11 11870.4 482.796   1
   0  -2  11 10339.0 515.859   3
   0  -2  12 185926. 2267.43   3
   0  -2 -12 185740. 2001.80   1
   0  -2 -13 7372.90 423.830   1
   0  -2  13 6747.51 457.228   3
   0  -2 -14 72.9687 48.6458   1
   0  -2  14 65.0278 69.9629   3
   0  -2 -15 977.904 166.022   2
   0  -2  15 909.556 200.126   3
   0  -2 -15 1059.31 176.146   1
   0  -2 -16 33838.9 1032.91   1
   0  -2 -16 32128.8 979.657   2
   0  -2 -17 2202.51 209.015   8
   0  -2  17 1570.04 264.646   3
   0  -2 -17 1718.55 229.703   2
   0  -2 -17 2212.23 282.589   1
   0  -2  18 471.879 168.447   3
   0  -2 -18 409.940 100.005   8
   0  -2 -18 402.969 141.071   1
   0  -2 -18 463.056 113.948   7
   0  -2 -18 377.366 112.707   2
   0  -2 -19 1619.20 191.356   8
   0  -2 -19 1027.13 178.503   2
   0  -2 -19 1660.98 194.154   7
   0  -2  19 1482.54 248.457   3
   0  -2 -20 9988.86 472.879   7
   0  -2 -20 10090.4 477.123   8
   0  -2 -21 1116.91 168.786   8
   0  -2 -21 746.888 135.417   7
   0  -2 -22 4183.01 306.319   8
   0  -2 -22 4159.92 306.506   7
   0  -2 -23 2755.05 245.177   8
   0  -2 -23 2227.80 219.685   7
   0  -2 -24 912.506 140.019   7
   0  -2 -24 851.094 140.155   8
   0  -2 -25 608.522 111.778   7
   0  -2 -25 459.882 97.6872   8
   0  -2 -26 5801.80 293.312   7
   0  -2 -26 5739.07 288.420   8
   0  -2 -27 835.203 100.827   7
   0  -2 -27 873.538 101.319   8
   0  -2 -28-40.2976 30.5560   7
   0  -2 -28 64.7112 30.4231   8
   0  -1   0 109.859 15.5017   3
   0  -1   1 73.5209 17.5535   3
   0  -1  -1 114.819 25.7233   1
   0  -1   2 247210. 1109.58   3
   0  -1  -2 232845. 1145.45   1
   0  -1  -3 6705.20 209.098   1
   0  -1   3 5891.00 199.585   3
   0  -1   4 96402.6 895.647   3
   0  -1  -4 95403.1 825.644   1
   0  -1  -5 221.354 46.1198   1
   0  -1   5 98.7255 47.8472   3
   0  -1  -6 83346.1 891.062   1
   0  -1   6 82755.0 1000.85   3
   0  -1   7 1141.78 131.879   3
   0  -1  -7 1046.71 114.906   1
   0  -1  -8 3799.22 221.853   1
   0  -1   8 3868.78 253.012   3
   0  -1  -9 564.452 92.0453   1
   0  -1   9 408.473 92.2833   3
   0  -1  10 41204.4 910.485   3
   0  -1 -10 39710.3 802.658   1
   0  -1 -11 78.1174 59.6592   1
   0  -1  11 221.697 95.0755   3
   0  -1 -12 12562.2 507.327   2
   0  -1 -12 11870.3 497.291   1
   0  -1  12 11651.4 543.125   3
   0  -1 -13 1944.66 220.413   1
   0  -1  13 1707.06 227.951   3
   0  -1 -13 1653.26 200.096   2
   0  -1  14 60907.8 1362.02   3
   0  -1 -14 59435.3 1229.17   2
   0  -1 -14 62329.7 1277.83   1
   0  -1  15 1187.56 197.091   3
   0  -1 -15 1441.90 199.683   2
   0  -1 -15 1317.57 201.355   1
   0  -1  16 10374.0 615.292   3
   0  -1 -16 10021.0 564.261   1
   0  -1 -16 10435.8 568.272   2
   0  -1 -17 2969.63 317.190   2
   0  -1  17 3063.78 344.101   3
   0  -1 -18 8478.83 547.979   2
   0  -1 -18 9339.02 424.382   8
   0  -1 -18 9125.34 427.083   7
   0  -1  18 9025.52 609.829   3
   0  -1 -19 3007.35 250.883   8
   0  -1  19 3247.09 376.013   3
   0  -1 -19 2893.86 325.263   2
   0  -1 -19 2875.16 251.878   7
   0  -1 -20 668.157 124.746   7
   0  -1 -20 648.511 124.894   8
   0  -1 -21 305.677 101.182   7
   0  -1 -21 139.673 65.3446   8
   0  -1 -22 906.760 151.142   7
   0  -1 -22 990.623 153.773   8
   0  -1 -23 718.068 133.828   7
   0  -1 -23 527.780 109.722   8
   0  -1 -24 4262.94 299.362   7
   0  -1 -24 3830.55 277.438   8
   0  -1 -25 327.512 90.3182   7
   0  -1 -25 239.509 77.8913   8
   0  -1 -26 975.903 125.438   8
   0  -1 -26 947.461 133.603   7
   0  -1 -27 400.782 79.2902   7
   0  -1 -27 396.978 76.3091   8
   0  -1 -28 837.714 94.9076   7
   0  -1 -28 774.172 82.5753   8
   0   0   1 873.687 37.0115   3
   0   0  -1 1091.67 37.2805   1
   0   0  -2 45712.5 340.929   1
   0   0   2 45615.8 377.175   3
   0   0   3 252.358 39.3344   3
   0   0  -3 238.998 33.2101   1
   0   0  -4 253523. 1166.14   1
   0   0   4 255324. 1281.95   3
   0   0  -5 33.5747 25.0344   1
   0   0   5 55.9540 36.1886   3
   0   0   6 21503.2 471.661   3
   0   0  -6 25148.3 461.690   1
   0   0  -7 79.9408 40.8750   1
   0   0   7 80.3819 46.3239   3
   0   0  -8 593.477 89.1818   1
   0   0   8 679.617 105.636   3
   0   0  -8 749.342 99.4478   2
   0   0  -9 4697.83 257.404   2
   0   0  -9 4984.16 265.258   1
   0   0 -10 183593. 1713.75   2
   0   0 -10 184067. 1743.53   1
   0   0  10 181838. 1824.87   3
   0   0 -11 4840.73 301.546   1
   0   0 -11 4539.29 292.487   2
   0   0 -12 47907.3 995.498   2
   0   0  12 48848.4 1059.36   3
   0   0 -12 47400.0 1000.88   1
   0   0 -13 1471.58 195.395   1
   0   0  13 1188.66 179.619   3
   0   0 -13 1474.40 194.064   2
   0   0 -14 60971.3 1267.74   2
   0   0  14 59402.4 1302.54   3
   0   0  15 7754.78 488.953   3
   0   0 -15 9216.97 525.020   2
   0   0 -16 2639.72 301.935   2
   0   0  16 2516.75 290.048   3
   0   0 -17 66.5924 41.1728   2
   0   0  17-180.703 94.1782   3
   0   0 -18 1697.57 176.451   8
   0   0  18 1529.83 249.128   3
   0   0 -18 1739.13 186.622   7
   0   0 -18 1667.28 254.863   2
   0   0  19-554.621 149.829   3
   0   0 -19-36.1535 69.1723   7
   0   0 -19-442.585 137.461   2
   0   0 -19-71.3264 74.3606   8
   0   0 -20 155.826 83.5759   7
   0   0 -20-4.11584 52.4524   8
   0   0 -21 374.421 111.542   7
   0   0 -21 367.632 99.6011   8
   0   0 -22 57.0432 59.7306   7
   0   0 -22 148.329 84.7429   8
   0   0 -23 592.627 124.899   7
   0   0 -23 412.897 100.656   8
   0   0 -24 899.350 147.757   7
   0   0 -24 770.454 126.148   8
   0   0 -25 820.405 131.988   7
   0   0 -25 905.635 122.308   8
   0   0 -26 195.865 71.1088   7
   0   0 -26 176.786 58.6407   8
   0   0 -27 7.67646 45.6062   7
   0   0 -27 12.8817 31.0385   8
   0   0 -28-7.23145 23.3009   8
   0   0 -28-15.1251 34.5362   7
   0   1   0 12.3506 14.5059   2
   0   1   0 122.808 20.6265   4
   0   1  -1 102.138 22.4353   4
   0   1   1 74.6797 22.5743   2
   0   1  -1 81.5706 19.6811   2
   0   1   1 104.250 14.0048   4
   0   1   2 253630. 626.981   3
   0   1  -2 258358. 1110.82   2
   0   1  -3 5982.55 194.415   4
   0   1  -3 6428.82 193.993   2
   0   1   3 5961.74 137.005   3
   0   1   3 6087.42 92.5126   4
   0   1  -4 92097.9 801.725   2
   0   1   4 93192.9 660.967   3
   0   1   5 114.547 36.2034   3
   0   1  -5 148.901 42.4764   2
   0   1  -6 78257.8 882.479   2
   0   1   6 76098.1 798.150   3
   0   1  -7 1030.57 115.189   2
   0   1   7 1123.95 109.261   3
   0   1  -8 2481.86 188.262   2
   0   1   8 2462.83 173.523   3
   0   1  -9 544.332 100.903   2
   0   1   9 543.620 90.0107   3
   0   1 -10 40833.5 853.392   2
   0   1  10 39114.1 794.819   3
   0   1  11 6.78536 32.3204   3
   0   1 -11 103.347 64.3322   2
   0   1  12 11485.1 486.302   3
   0   1 -12 11598.4 514.038   2
   0   1 -13 1597.84 207.533   2
   0   1  13 1302.66 171.378   3
   0   1 -14 62909.3 1333.99   2
   0   1  14 62402.5 1251.76   3
   0   1 -15 1537.52 229.966   2
   0   1  15 1443.09 205.619   3
   0   1  16 9789.42 538.396   3
   0   1 -16 9184.44 569.645   2
   0   1  17 2750.22 290.864   3
   0   1 -17 3163.39 349.467   2
   0   1 -18 9900.15 635.837   2
   0   1 -18 9178.02 429.217   7
   0   1 -18 8692.40 383.012   8
   0   1 -19 3079.98 262.649   7
   0   1 -19 2610.80 216.422   8
   0   1 -19 3382.12 381.258   2
   0   1 -20 781.010 127.158   8
   0   1 -20 791.926 140.765   7
   0   1 -21 128.884 74.2320   7
   0   1 -21-36.8969 64.4458   8
   0   1 -22 668.537 126.628   7
   0   1 -22 807.890 128.087   8
   0   1 -23 666.227 137.327   7
   0   1 -23 901.090 129.009   8
   0   1 -24 3495.41 235.181   8
   0   1 -24 3848.33 282.218   7
   0   1 -25 162.939 50.6120   8
   0   1 -25 267.540 74.1668   7
   0   1 -26 1006.79 107.256   8
   0   1 -26 1119.92 137.266   7
   0   1 -27 384.214 77.6081   7
   0   1 -28 837.760 92.6559   7
   0   2   0 402929. 1451.85   4
   0   2   0 406427. 1748.37   2
   0   2   1 1157.71 69.6149   4
   0   2  -1 1115.68 85.0947   4
   0   2  -1 1156.20 98.5620   2
   0   2   1 1101.88 95.3322   2
   0   2  -2 41447.7 564.059   4
   0   2  -2 42439.6 603.248   2
   0   2  -3 1919.32 134.605   4
   0   2  -3 1726.20 132.054   2
   0   2   3 1781.97 58.7519   4
   0   2   4 23113.4 244.954   3
   0   2  -4 23450.7 498.198   2
   0   2  -5 190.686 50.8736   2
   0   2   5 284.239 36.9883   3
   0   2   6 80477.5 688.069   3
   0   2  -6 81023.2 1031.87   2
   0   2   7 382.593 31.9791   4
   0   2  -7 242.789 71.3720   2
   0   2   7 324.055 54.2196   3
   0   2   8 13101.3 225.106   4
   0   2   8 13810.6 359.026   3
   0   2  -8 13911.5 480.766   2
   0   2   9 3322.58 194.935   3
   0   2  -9 3236.76 249.988   2
   0   2 -10 46311.6 984.775   2
   0   2  10 45664.5 778.674   3
   0   2 -11 10871.3 504.188   2
   0   2  11 10405.4 394.287   3
   0   2  12 188664. 1786.31   3
   0   2 -12 187860. 2208.36   2
   0   2 -13 7730.24 474.284   2
   0   2  13 7325.46 372.001   3
   0   2  14 32.1623 34.2896   3
   0   2 -14 131.330 57.9228   2
   0   2 -15 905.861 181.778   2
   0   2 -16 35503.0 1168.48   2
   0   2 -17 2314.52 317.768   2
   0   2 -18 580.541 165.721   2
   0   2 -18 411.624 104.505   7
   0   2 -19 1275.77 168.912   7
   0   2 -19 1284.81 240.129   2
   0   2 -20 10670.4 487.809   7
   0   2 -21 985.774 156.411   7
   0   2 -22 4416.95 313.858   7
   0   2 -23 2376.73 225.090   7
   0   2 -24 846.932 137.743   7
   0   2 -25 416.444 89.8907   7
   0   2 -26 5253.76 271.848   7
   0   2 -27 730.426 95.6646   7
   0   2 -28 134.803 40.1109   7
   0   3   0-8.64769 40.8480   2
   0   3   0 19.9298 29.2985   4
   0   3  -1 288.666 74.3761   2
   0   3   1 285.960 65.2609   2
   0   3   1 382.913 53.0890   4
   0   3  -1 342.720 62.4520   4
   0   3   2 45693.4 491.180   4
   0   3  -2 46241.1 776.920   2
   0   3   2 47443.4 761.857   2
   0   3  -3 190.373 64.3182   2
   0   3  -4 2545.13 197.265   2
   0   3  -5 621.268 105.656   2
   0   3  -6 29835.6 715.645   2
   0   3  -7 1209.14 157.044   2
   0   3  -8 7379.92 389.204   2
   0   3  -9 4496.05 320.561   2
   0   3 -10 15235.5 611.965   2
   0   3 -11 4400.07 344.419   2
   0   3 -12 30675.4 952.659   2
   0   3 -13 322.511 99.3208   2
   0   3 -14 47561.7 1308.17   2
   0   3 -15 1480.42 236.531   2
   0   3 -16 4218.02 425.606   2
   0   3 -17 4588.14 451.390   2
   0   3 -17 4632.06 294.404   7
   0   3  17 4351.36 301.788   6
   0   3 -18 16029.8 565.927   7
   0   3 -18 16375.3 876.439   2
   0   3 -19 618.834 119.286   7
   0   3 -20 2504.83 232.240   7
   0   3 -21 644.705 124.652   7
   0   3 -22 1494.60 180.822   7
   0   3 -23 463.413 98.5271   7
   0   3 -24 1177.14 145.061   7
   0   3 -25 963.538 120.893   7
   0   3 -26 1337.27 122.636   7
   0   3  27 465.785 68.0032   5
   0   3 -27 540.060 67.2780   7
   0   4   0 59349.1 1013.54   2
   0   4   1 63.3116 45.8787   2
   0   4  -1-3.37681 46.3306   2
   0   4  -2 5754.34 321.845   2
   0   4  -3 533.381 103.728   2
   0   4  -4 67693.9 1159.81   2
   0   4  -5 65.3210 58.5835   2
   0   4  -6 13176.4 542.142   2
   0   4  -7 1028.74 160.947   2
   0   4  -8 5278.61 369.935   2
   0   4  -9 114.027 48.6638   2
   0   4 -10 26421.3 892.534   2
   0   4 -11 5993.86 441.055   2
   0   4 -12 8529.94 551.530   2
   0   4 -13 182.809 55.9116   2
   0   4 -14 11329.7 683.326   2
   0   4  15 1048.89 146.354   6
   0   4 -15 1019.54 220.843   2
   0   4 -16 12399.7 761.768   2
   0   4  16 12228.6 505.674   6
   0   4 -17 1752.98 293.353   2
   0   4 -19 721.925 127.625   7
   0   4 -20 88.4220 57.0336   7
   0   4 -21 724.501 117.186   7
   0   4 -22 742.530 120.462   7
   0   4 -23 170.481 63.1733   7
   0   4 -24 650.926 91.6898   7
   0   4  26 858.906 99.7564   5
   0   5   0-20.5080 61.4146   2
   0   5   1 546.083 120.021   2
   0   5  -1 485.449 114.144   2
   0   5  -2 164040. 1976.86   2
   0   5  -3 185.130 90.9924   2
   0   5  -4 36737.0 969.201   2
   0   5  -5 1404.22 205.741   2
   0   5  -6 40726.0 1076.29   2
   0   5  -7 420.212 120.948   2
   0   5  -8 52119.7 1289.83   2
   0   5  -9 8.70676 62.1264   2
   0   5 -10 1272.29 219.443   2
   0   5 -11 230.822 149.117   2
   0   5 -12 18214.0 861.412   2
   0   5 -13 373.316 168.451   2
   0   5 -14 4245.37 440.848   2
   0   5  14 4080.26 248.786   9
   0   5  14 4467.68 300.662   6
   0   5 -15 1139.23 212.130   2
   0   5  15 1743.21 166.121   9
   0   5  24 443.327 90.6929   5
   0   5  25 227.763 64.8810   5
   0   6   0 25830.3 858.480   2
   0   6  -1 119.919 90.3838   2
   0   6  -2 20422.4 797.761   2
   0   6  -3 287.531 103.941   2
   0   6  -4 16795.3 737.081   2
   0   6  -5 43.2989 84.5597   2
   0   6  -6 13613.5 693.196   2
   0   6  -7 270.914 129.931   2
   0   6  -8 1757.02 263.974   2
   0   6  -9 322.178 121.146   2
   0   6 -10 2155.01 306.824   2
   0   6  11 891.914 129.337   9
   0   6 -11 905.026 196.588   2
   0   6 -12 8437.81 630.315   2
   0   6  12 7667.01 365.185   9
   0   6 -13 149.369 148.252   2
   0   6  13 193.646 74.9082   9
   0   6  14 12390.2 464.844   9
   0   6  15 514.810 101.997   9
   0   6  16 13205.5 466.771   9
   0   6  17 201.694 65.2960   9
   0   6  19 480.401 90.7639  12
   0   6  20 7791.11 298.903  12
   0   6  22 2074.15 188.830   5
   0   6  23 398.538 85.0797   5
   0   6  24 155.515 52.1177   5
   0   6 -24 261.570 51.7686  14
   0   7  -1 62.8543 82.7783   2
   0   7  -2 4919.41 425.983   2
   0   7  -3 292.533 111.319   2
   0   7  -4 15656.3 780.865   2
   0   7  -5 539.634 147.374   2
   0   7  -6 8964.89 619.111   2
   0   7   6 8749.79 386.491  12
   0   7   6 9235.64 389.780   9
   0   7   7 187.945 55.2145   5
   0   7   7 247.940 86.5562  12
   0   7   7 223.958 67.1555   9
   0   7   8 2361.11 230.980   5
   0   7   8 2433.51 213.745   9
   0   7  -8 2262.51 313.407   2
   0   7  -9 1109.86 243.131   2
   0   7   9 1163.42 167.816   5
   0   7   9 1269.34 158.133   9
   0   7  10 9892.16 430.507   9
   0   7  10 10030.6 481.364   5
   0   7 -10 9810.54 681.673   2
   0   7  11 2064.62 225.310   5
   0   7  11 2452.62 215.729   9
   0   7  12 11648.0 532.171   5
   0   7  12 12726.5 493.792   9
   0   7  13 532.403 115.193   9
   0   7  13 643.417 141.668   5
   0   7  14 18128.3 665.900   5
   0   7  14 18762.7 584.363   9
   0   7  15 1472.80 169.225   9
   0   7  15 1398.04 163.637  12
   0   7  15 1482.37 199.361   5
   0   7  16-19.1748 55.9300   9
   0   7  16 152.190 73.3356  12
   0   7  16 63.7525 75.5977   5
   0   7  17 1001.41 159.733   5
   0   7  17 960.048 121.863   9
   0   7  17 875.725 119.758  12
   0   7  18 7366.77 396.253   5
   0   7  18 6805.22 304.479  12
   0   7  18 7130.44 296.137   9
   0   7  19 402.314 75.8088  12
   0   7  19 269.335 91.0683   5
   0   7  20 594.837 77.4459  12
   0   7  20 553.022 108.690   5
   0   7 -20 383.250 73.5841  14
   0   7 -21 890.707 98.0401  14
   0   7  21 1039.19 133.624   5
   0   7  22 1229.53 127.515   5
   0   7 -22 1128.02 90.4300  14
   0   7  23 57.2748 37.6200   5
   0   8   0 42970.6 903.667  12
   0   8   0 42759.5 816.619   9
   0   8  -1 378.191 98.6178  12
   0   8   1 324.797 76.1607   9
   0   8   1 321.727 81.9117  12
   0   8  -1 407.440 87.4587   9
   0   8   2 1093.08 156.849  12
   0   8   2 826.883 125.082   9
   0   8   3 76.1728 64.7888  12
   0   8   3 76.7250 52.7627   9
   0   8  -4 347.062 154.064   2
   0   8   4 330.228 89.1172   9
   0   8   4 133.779 66.8758  12
   0   8   5 67.0366 52.7862  12
   0   8   5 134.425 74.3696   9
   0   8  -5 2.91672 144.741   2
   0   8   6 3402.64 256.275   9
   0   8   6 3707.26 276.866  12
   0   8   6 3807.36 288.636   5
   0   8   7 158.847 66.8393  12
   0   8   7 204.765 83.6480   5
   0   8   7 136.561 58.5944   9
   0   8   8 6364.74 389.834   5
   0   8   8 6132.48 346.065   9
   0   8   8 5615.76 339.050  12
   0   8   9 163.630 76.9172   5
   0   8   9 332.527 96.3327  12
   0   8   9 331.510 99.4640   9
   0   8  10 13628.2 508.860   9
   0   8  10 13437.9 570.973   5
   0   8  10 13578.0 520.180  12
   0   8  11 406.479 104.603   9
   0   8  11 328.245 97.2914  12
   0   8  11 253.555 83.8528   5
   0   8  12 5673.05 325.384   9
   0   8  12 5998.08 337.203  12
   0   8  12 5928.89 380.496   5
   0   8  13 480.594 102.065   9
   0   8  13 330.248 105.426   5
   0   8  13 440.142 97.4051  12
   0   8  14 8342.86 438.078   5
   0   8  14 8900.28 385.239   9
   0   8  14 8679.86 385.098  12
   0   8  15 198.537 71.5057  12
   0   8  15 226.755 90.3400   5
   0   8  15 322.773 89.3505   9
   0   8  16 4307.24 249.865  12
   0   8  16 3991.68 285.796   5
   0   8  16 4645.48 253.655   9
   0   8  17 671.580 96.9439   9
   0   8  17 564.492 93.7191  12
   0   8  17 613.014 121.667   5
   0   8  18 257.782 60.3336  12
   0   8  18 195.789 72.2217   5
   0   8  18 281.722 58.0182   9
   0   8  19 143.122 37.4344   9
   0   8  19 204.530 49.8232  12
   0   8  19 172.376 64.0252   5
   0   8  20 1235.64 84.7384  12
   0   8  20 1415.16 135.405   5
   0   8  21 168.550 51.3287   5
   0   9   0 54.6000 48.2860   9
   0   9   1 140.873 69.4420   9
   0   9   1 108.605 70.2783  12
   0   9  -1 266.681 84.4451   9
   0   9   2 13630.9 531.811  12
   0   9   2 13117.9 480.658   9
   0   9   3 130.144 65.3134   9
   0   9   3 145.440 79.6392  12
   0   9   4 2684.69 241.650  12
   0   9   4 2563.20 216.440   9
   0   9   5 183.719 67.4100   9
   0   9  -5 347.850 93.9548  11
   0   9   5 141.121 74.4329  12
   0   9  -6 4680.98 264.599  11
   0   9   6 5279.64 313.694   9
   0   9   6 4792.13 320.199  12
   0   9   7 239.105 84.0568   9
   0   9   7 152.345 73.2363  12
   0   9   7 238.376 94.3992   5
   0   9   8 8913.38 421.922  12
   0   9   8 9314.38 415.561   9
   0   9   8 9583.05 450.865   5
   0   9   9 1053.16 151.833  12
   0   9   9 1120.78 150.877   9
   0   9   9 880.784 139.566   5
   0   9  10 431.221 101.330  12
   0   9  10 383.143 106.344   5
   0   9  10 326.051 89.5365   9
   0   9  11-53.6213 55.9341   9
   0   9  11-39.3138 55.8286  12
   0   9  12 6334.24 355.750   5
   0   9  12 6952.60 342.682  12
   0   9  12 7238.49 340.721   9
   0   9  13 89.5497 68.1007   5
   0   9  13 50.5274 41.3728   9
   0   9  13 93.7765 64.9570  12
   0   9  14 167.139 71.1470   5
   0   9  14 181.377 64.6725  12
   0   9  14 311.873 78.9599   9
   0   9  15 77.3969 53.6537   5
   0   9  15 16.7530 44.3182  12
   0   9  15-18.1084 45.6869   9
   0   9  16 924.092 119.561   5
   0   9  16 937.275 103.981  12
   0   9  16 886.027 102.560   9
   0   9  17 74.2785 45.3525   5
   0   9  17 80.5990 36.6373   9
   0   9  17 93.1405 39.8890  12
   0   9  18 173.828 52.5689   5
   0   9  18 218.701 45.0941  12
   0   9  18 104.553 29.0844   9
   0  10   0 12989.2 430.676   9
   0  10   1 127.519 59.2128   9
   0  10   2 425.815 89.9208   9
   0  10   3 13.2962 44.8315   9
   0  10  -3-32.7438 68.2252  11
   0  10  -4 9017.06 355.569  11
   0  10   4 9379.62 388.300   9
   0  10  -5 55.9833 47.2020  11
   0  10   5 101.704 64.5559   9
   0  10   6 4458.85 289.524  12
   0  10   6 4549.85 271.872   9
   0  10   7 296.359 76.3364  12
   0  10   7 293.068 74.4615   9
   0  10   8 896.156 125.499   9
   0  10   8 1179.09 148.701  12
   0  10   9-3.34948 56.6621  12
   0  10   9-21.4628 62.8124   9
   0  10  10 4346.64 256.852  12
   0  10  10 4298.04 245.149   9
   0  10  11 27.1726 48.2231  12
   0  10  11 45.3497 46.6467   5
   0  10  11 12.5406 49.0098   9
   0  10  12 810.862 104.236   9
   0  10  12 879.327 111.029  12
   0  10  12 788.632 99.4600   5
   0  10  13-18.4354 37.2846   5
   0  10  13 63.0504 48.3110  12
   0  10  13 9.18423 36.3524   9
   0  10  14 1579.49 121.850   9
   0  10  14 1287.56 107.308   5
   0  10  15 182.616 45.1027   9
   0  11   0 18.6501 44.4344  11
   0  11  -1-66.6424 52.8528  11
   0  11   1 77.2822 38.2819   9
   0  11  -2 777.032 96.6630  11
   0  11   2 792.953 97.2143   9
   0  11  -3 118.840 49.4172  11
   0  11   3 48.7113 40.2945   9
   0  11   4 889.770 103.856   9
   0  11   5 3.57124 40.7023   9
   0  11   6 934.229 105.883   9
   0  11   7 12.3189 36.8144   9
   0  11   8 690.437 88.4565   9
   0  11   9-34.9685 45.0068   9
   0  11  10 2024.17 132.739   9
   0  11  11 226.463 46.8036   9
  -1  -8   5 65.8940 66.5728   1
  -1  -8   4 17319.5 907.250   1
  -1  -8   3-388.977 143.323   1
  -1  -8   2 7488.26 610.353   1
  -1  -8   1 295.122 113.883   1
  -1  -8   0 20485.9 988.238   1
  -1  -8  -1-108.847 81.1277   1
  -1  -8  -2 9109.96 640.990   1
  -1  -8  -3 1034.56 217.943   1
  -1  -8  -4 7005.44 548.333   1
  -1  -7   6 23332.9 1011.78   1
  -1  -7   5 29.4704 120.285   1
  -1  -7   4 65466.6 1663.77   1
   1  -7  -4 66408.0 1519.82   1
  -1  -7   3-176.303 99.4763   1
   1  -7  -3-271.328 104.852   1
  -1  -7   2 13702.7 751.658   1
   1  -7  -2 14270.1 719.162   1
  -1  -7   1-274.761 116.054   1
   1  -7  -1 191.298 147.151   1
   1  -7   0 26790.0 998.228   1
  -1  -7   0 26675.4 1047.89   1
  -1  -7  -1-461.437 152.009   1
   1  -7   1 482.582 163.272   1
  -1  -7  -2 18812.0 883.751   1
   1  -7   2 18378.3 846.536   1
   1  -7   3 542.733 123.994   1
  -1  -7  -3 577.638 100.838   1
  -1  -7  -4 23972.1 992.593   1
   1  -7   4 23341.9 984.205   1
  -1  -7  -5 212.279 126.827   1
   1  -7   5-439.046 144.407   1
  -1  -7  -6 11333.1 670.486   1
  -1  -7  -7 962.019 186.301   1
  -1  -7  -8 7578.08 526.449   1
  -1  -7  -9 221.734 88.5847   1
   1  -6 -24 268.795 53.5825   8
   1  -6 -23 99.3629 41.5278   8
   1  -6 -22 1470.65 140.659   8
   1  -6 -21 535.914 93.5950   8
   1  -6 -20 1666.79 164.445   8
   1  -6 -19 406.499 87.6163   8
   1  -6 -18 1602.13 167.596   8
   1  -6 -17 350.513 83.9681   8
   1  -6 -16 4752.16 280.985   8
  -1  -6  14 937.804 181.631   3
  -1  -6  13 1235.13 206.370   3
  -1  -6  12 38783.3 1131.50   3
  -1  -6  11 994.394 171.906   3
  -1  -6  10 10693.1 553.073   3
   1  -6 -10 10098.5 518.708   1
   1  -6  -9 656.873 143.407   1
   1  -6  -8 27574.7 869.170   1
   1  -6  -7 33.7033 78.2691   1
   1  -6  -6 60978.9 1317.32   1
   1  -6  -5 61.8778 91.8943   1
   1  -6  -4 54710.9 1287.56   1
  -1  -6   3-14.8110 87.2244   1
   1  -6  -3 91.7731 61.2190   1
  -1  -6   2 99845.3 1824.09   1
   1  -6  -2 99312.5 1721.12   1
  -1  -6   1 308.389 119.611   1
   1  -6  -1 168.434 100.447   1
  -1  -6   0 2299.40 279.121   1
   1  -6   0 2056.03 252.829   1
  -1  -6  -1 625.166 158.053   1
   1  -6   1 873.982 186.340   1
   1  -6   2 33523.9 1037.12   1
  -1  -6  -2 33512.1 1069.96   1
  -1  -6  -3 1297.58 214.493   1
  -1  -6  -4 3289.06 348.661   1
  -1  -6  -5 2288.09 288.627   1
  -1  -6  -6 2847.79 319.464   1
  -1  -6  -7 47.8026 71.1215   1
   1  -6   7 140.182 78.4099   3
   1  -6   8 22428.9 791.528   3
  -1  -6  -8 21899.7 864.279   1
   1  -6   9 1212.77 194.795   3
  -1  -6  -9 1501.35 233.245   1
   1  -6  10 28478.3 973.404   3
  -1  -6 -10 27606.2 963.860   1
   1  -6  11 1036.47 190.204   3
  -1  -6 -11 915.296 186.484   1
   1  -6  12 2822.87 313.525   3
  -1  -6 -12 2683.49 299.236   1
   1  -6  13 946.173 192.012   3
  -1  -6 -13 573.349 134.344   1
  -1  -6 -16 1777.14 173.443   8
  -1  -6 -17 27.7577 49.8569   8
  -1  -6 -18 3935.39 252.984   8
  -1  -6 -19 96.3854 51.1552   8
  -1  -6 -20 2354.51 183.143   8
  -1  -6 -21 143.787 50.6765   8
  -1  -6 -22 73.4440 39.6090   8
  -1  -6 -23 49.0722 34.4139   8
   1  -5 -26 2177.64 133.981   8
   1  -5 -25-2.59290 34.6883   8
   1  -5 -24 1217.56 131.377   8
   1  -5 -23 177.365 54.2938   7
   1  -5 -23 231.602 69.4370   8
   1  -5 -22 238.292 61.3022   7
   1  -5 -22 104.685 60.9234   8
   1  -5 -21 71.2413 45.0553   8
   1  -5 -21-12.9822 50.8378   7
   1  -5 -20 3151.19 221.674   7
   1  -5 -20 3226.35 253.183   8
   1  -5 -19 602.955 116.326   8
   1  -5 -18 649.795 120.575   8
   1  -5 -17 362.086 93.1748   8
  -1  -5  16 10730.4 667.213   3
   1  -5 -16 10632.2 438.504   8
  -1  -5  15 2605.89 335.661   3
   1  -5 -15 1910.93 182.387   8
   1  -5 -14 16903.2 677.358   1
   1  -5 -14 17877.4 527.562   8
  -1  -5  13 61.6292 94.0194   3
   1  -5 -13 105.104 83.1354   1
  -1  -5  12 737.247 166.296   3
   1  -5 -12 727.842 143.092   1
   1  -5 -11-47.1340 46.4191   1
  -1  -5  11 137.984 62.5683   3
   1  -5 -10 34469.9 908.775   1
  -1  -5  10 34650.6 1002.11   3
   1  -5  -9 1234.04 173.986   1
  -1  -5   9 1456.89 199.555   3
   1  -5  -8 18250.9 657.320   1
  -1  -5   8 18250.4 653.316   3
  -1  -5   7 1285.01 164.839   3
   1  -5  -7 1040.07 163.853   1
   1  -5  -6 1818.41 211.877   1
  -1  -5   6 1177.66 148.092   3
   1  -5  -5 1102.73 156.065   1
  -1  -5   5 904.726 126.149   3
   1  -5  -4 55497.1 1152.23   1
  -1  -5   4 58475.2 888.817   3
   1  -5  -3 407.482 111.838   1
   1  -5  -2 70580.2 1283.02   1
   1  -5  -1 198.224 81.2655   1
  -1  -5   1 107.331 57.3542   1
   1  -5   0 73953.2 1306.95   1
  -1  -5   0 71444.5 1347.65   1
  -1  -5  -1 1421.69 203.100   1
   1  -5   2 11087.5 384.963   3
  -1  -5  -2 11298.5 549.864   1
   1  -5   3 262.690 77.8666   3
  -1  -5  -3 308.954 83.8486   1
   1  -5   4 4522.88 285.021   3
  -1  -5  -4 4740.49 373.798   1
  -1  -5  -5 730.373 146.422   1
   1  -5   5 760.146 111.792   3
  -1  -5  -6 41711.6 1110.49   1
   1  -5   6 40777.1 959.893   3
   1  -5   7 423.601 108.920   3
  -1  -5  -7 528.961 137.880   1
   1  -5   8 9344.24 508.127   3
  -1  -5  -8 10034.4 546.633   1
  -1  -5  -9 4392.29 365.834   1
   1  -5   9 3975.87 345.026   3
   1  -5  10 29939.3 988.018   3
  -1  -5 -10 29411.0 943.855   1
  -1  -5 -11 715.225 173.065   1
   1  -5  11 1053.34 195.836   3
  -1  -5 -12 13740.6 658.416   1
   1  -5  12 14251.5 732.992   3
   1  -5  13 3148.86 365.318   3
  -1  -5 -13 2864.17 311.664   1
   1  -5  14-74.7346 59.4039   3
  -1  -5 -14-284.940 97.1655   1
  -1  -5 -15 7365.52 501.488   1
  -1  -5 -15 6816.94 348.081   8
   1  -5  15 7421.12 570.086   3
  -1  -5 -16 21598.6 635.352   8
  -1  -5 -17 580.237 107.458   8
  -1  -5 -18 9185.02 423.785   8
  -1  -5 -19 459.056 105.959   8
  -1  -5 -20 2812.07 235.826   8
  -1  -5 -21 67.8283 52.5189   8
  -1  -5 -22 1421.10 153.200   8
  -1  -5 -23 667.383 104.992   8
  -1  -5 -24 1405.83 128.964   8
  -1  -5 -25 98.4982 36.8316   8
   1  -4 -27 39.9115 31.4029   8
   1  -4 -26 2092.45 161.616   8
   1  -4 -26 2111.43 140.281   7
   1  -4 -25 531.072 91.1916   8
   1  -4 -25 531.236 87.6447   7
   1  -4 -24 639.755 112.172   8
   1  -4 -24 659.888 102.334   7
   1  -4 -23 178.548 72.9712   8
   1  -4 -23 73.9005 48.6763   7
   1  -4 -22 8228.78 382.052   7
   1  -4 -22 8249.54 408.140   8
   1  -4 -21 2020.39 210.193   8
   1  -4 -21 1786.58 188.877   7
   1  -4 -20 6709.48 378.956   8
   1  -4 -20 6368.05 349.852   7
   1  -4 -19 336.445 86.1934   7
   1  -4 -19 292.973 90.0965   8
   1  -4 -18 5820.63 349.365   8
   1  -4 -18 6387.07 343.979   7
  -1  -4  17 324.704 117.351   3
   1  -4 -17 355.013 80.3487   7
   1  -4 -17 250.099 98.7799   1
   1  -4 -17 383.046 99.8078   8
   1  -4 -16 5091.65 380.405   1
   1  -4 -16 5685.76 304.292   7
  -1  -4  16 6363.95 517.103   3
   1  -4 -16 5855.23 329.262   8
  -1  -4  15 1655.83 258.290   3
   1  -4 -15 1851.54 234.739   1
   1  -4 -14 5739.20 381.571   1
  -1  -4  14 5856.48 462.896   3
   1  -4 -13 234.251 88.4134   1
  -1  -4  13 297.722 142.920   3
  -1  -4  12 19072.2 778.441   3
   1  -4 -12 18140.3 640.153   1
   1  -4 -11 536.524 120.222   1
  -1  -4  11 539.775 122.337   3
   1  -4 -10 3750.42 280.337   1
  -1  -4  10 4015.98 329.453   3
  -1  -4   9 1564.10 196.480   3
   1  -4  -9 1323.41 165.005   1
   1  -4  -8 2630.34 228.173   1
  -1  -4   8 2990.43 257.646   3
  -1  -4   7 14.2337 37.8267   3
   1  -4  -7 120.670 76.4401   1
   1  -4  -6 1993.76 200.072   1
  -1  -4   6 2342.75 204.845   3
  -1  -4   5 399.496 93.4397   3
   1  -4  -5 331.859 93.9243   1
  -1  -4   4 15012.7 440.781   3
   1  -4  -4 14245.3 510.865   1
  -1  -4   3 275.495 64.2875   3
   1  -4  -3 342.408 93.2691   1
  -1  -4   2 35718.2 546.147   3
   1  -4  -2 34096.6 406.351   3
   1  -4  -2 36249.0 783.358   1
   1  -4  -1 104.207 65.4042   1
  -1  -4   1 64.7964 34.4809   3
   1  -4  -1 5.72027 28.1807   3
   1  -4   0 1218.88 107.278   3
  -1  -4   0 1071.81 154.832   1
   1  -4   1 202.569 51.7376   3
  -1  -4  -1 224.168 97.5957   1
  -1  -4  -2 20174.5 640.164   1
   1  -4   2 20159.6 502.523   3
  -1  -4  -3 162.824 58.9214   1
   1  -4   3 315.055 87.3165   3
  -1  -4  -4 94044.4 1470.64   1
   1  -4   4 93203.7 1236.58   3
  -1  -4  -5 938.106 153.058   1
   1  -4   5 1071.85 149.402   3
   1  -4   6 10295.2 461.033   3
  -1  -4  -6 10959.9 517.609   1
  -1  -4  -7 1148.89 174.552   1
   1  -4   7 1041.85 157.090   3
  -1  -4  -8 28372.0 836.826   1
   1  -4   8 30112.8 872.266   3
  -1  -4  -9 1427.33 199.763   1
   1  -4   9 1062.61 169.796   3
   1  -4  10 58171.8 1330.79   3
  -1  -4 -10 55225.5 1216.55   1
   1  -4  11 4003.28 366.206   3
  -1  -4 -11 4284.65 346.941   1
  -1  -4 -12 25911.0 864.624   1
   1  -4  12 26397.6 971.590   3
   1  -4  13 311.203 138.508   3
  -1  -4 -13 392.529 103.481   1
   1  -4  14 52743.2 1473.44   3
  -1  -4 -14 48747.5 1251.29   1
  -1  -4 -15 4684.91 294.460   8
   1  -4  15 4023.11 414.582   3
  -1  -4 -15 5090.16 418.367   1
  -1  -4 -16 127.530 76.5481   8
   1  -4  16 326.929 162.728   3
  -1  -4 -17 128.223 72.7372   8
  -1  -4 -17 157.017 71.3217   7
  -1  -4 -18 17364.9 606.210   8
  -1  -4 -18 16675.0 545.503   7
  -1  -4 -19 1035.10 153.798   8
  -1  -4 -19 834.294 130.595   7
  -1  -4 -20 6753.52 350.100   7
  -1  -4 -20 7275.80 395.058   8
  -1  -4 -21 1659.64 189.379   8
  -1  -4 -21 1648.23 172.542   7
  -1  -4 -22 2352.32 216.507   8
  -1  -4 -22 2078.73 183.382   7
  -1  -4 -23-12.4983 54.5944   8
  -1  -4 -23 67.7458 44.9050   7
  -1  -4 -24 1828.04 168.393   8
  -1  -4 -24 1581.29 135.170   7
  -1  -4 -25 930.267 90.0912   7
  -1  -4 -25 879.307 108.292   8
  -1  -4 -26 508.065 77.0406   8
   1  -3 -27 510.950 82.2423   8
   1  -3 -27 392.144 65.7828   7
   1  -3 -26 810.262 113.067   8
   1  -3 -26 606.713 98.8174   7
   1  -3 -25-7.97313 61.5784   8
   1  -3 -25 171.700 66.5251   7
   1  -3 -24 2879.48 235.602   8
   1  -3 -24 2342.14 206.004   7
   1  -3 -23 622.890 114.384   7
   1  -3 -23 908.600 144.246   8
   1  -3 -22 487.468 113.814   8
   1  -3 -22 495.372 114.775   7
   1  -3 -21 264.670 89.8553   8
   1  -3 -21 358.697 92.8554   7
   1  -3 -20 6964.50 393.856   8
   1  -3 -20 7241.28 390.927   7
   1  -3 -19-29.0467 67.7629   8
   1  -3 -19 44.7733 69.2998   7
   1  -3 -18 15191.5 558.100   8
  -1  -3  18 15141.2 820.176   3
   1  -3 -18 15516.1 549.359   7
   1  -3 -18 13732.3 664.334   1
   1  -3 -17 705.891 153.011   2
   1  -3 -17 1114.97 191.963   1
   1  -3 -17 866.428 126.587   7
  -1  -3  17 934.555 201.385   3
   1  -3 -17 820.490 132.958   8
   1  -3 -16 13277.1 587.990   2
   1  -3 -16 13664.5 625.991   1
   1  -3 -15 3210.05 287.628   1
  -1  -3  15 3475.08 356.335   3
   1  -3 -15 3392.50 287.039   2
  -1  -3  14 36925.7 1135.88   3
   1  -3 -14 34850.8 924.821   1
   1  -3 -13 568.002 121.900   1
  -1  -3  13 420.374 130.005   3
   1  -3 -12 5638.55 343.167   1
  -1  -3  12 6053.55 423.289   3
  -1  -3  11 499.687 120.467   3
   1  -3 -11 342.397 88.3570   1
  -1  -3  10 12435.1 547.974   3
   1  -3 -10 12246.9 461.947   1
   1  -3  -9 2474.24 203.569   1
  -1  -3   9 2632.12 242.536   3
   1  -3  -8 24163.7 614.223   1
  -1  -3   8 25642.0 708.757   3
  -1  -3   7 637.481 113.471   3
   1  -3  -7 673.351 109.888   1
   1  -3  -6 31900.6 678.363   1
  -1  -3   6 32726.0 710.240   3
  -1  -3   5 1659.68 152.252   3
   1  -3  -5 1564.32 148.901   1
   1  -3  -4 10794.6 383.738   1
  -1  -3   4 10562.5 346.790   3
   1  -3  -3 534.405 91.9180   1
  -1  -3   3 521.302 74.7492   3
   1  -3  -2 9889.38 341.460   1
  -1  -3   2 9618.64 264.178   3
   1  -3  -1 336.018 46.4281   3
  -1  -3   1 267.669 37.0398   3
   1  -3  -1 282.307 64.6494   1
  -1  -3   0 63967.1 936.700   1
   1  -3   0 63200.5 674.809   3
  -1  -3  -1 331.448 82.4655   1
   1  -3   1 427.438 64.6418   3
   1  -3   2 103516. 1042.17   3
  -1  -3  -2 106848. 1273.20   1
   1  -3   3 1966.24 155.535   3
  -1  -3  -3 2172.74 194.886   1
   1  -3   4 77049.7 1053.22   3
  -1  -3  -4 78317.5 1187.38   1
  -1  -3  -5 1190.45 154.217   1
   1  -3   5 1106.17 136.921   3
  -1  -3  -6 17693.3 585.754   1
   1  -3   6 17767.6 569.933   3
   1  -3   7 3683.28 278.568   3
  -1  -3  -7 4088.04 291.334   1
   1  -3   8 6984.16 395.599   3
  -1  -3  -8 7567.06 396.743   1
  -1  -3  -9 241.892 78.2623   1
   1  -3   9 403.568 111.665   3
   1  -3  10 10556.5 539.926   3
  -1  -3 -10 10369.4 486.391   1
  -1  -3 -11 800.536 145.925   1
   1  -3  11 562.544 140.377   3
  -1  -3 -12 27732.4 848.574   1
   1  -3  12 29626.5 987.867   3
   1  -3  13 280.999 129.248   3
  -1  -3 -13 399.292 106.600   1
   1  -3  14 4489.88 420.144   3
  -1  -3 -14 4410.31 373.920   1
   1  -3  15 4762.20 440.639   3
  -1  -3 -15 5525.42 424.133   1
  -1  -3 -16 25691.8 666.777   7
  -1  -3 -16 23747.8 879.127   2
  -1  -3 -16 24823.8 921.911   1
   1  -3  16 27086.9 1082.46   3
  -1  -3 -16 27327.5 716.211   8
  -1  -3 -17 1336.51 238.525   1
  -1  -3 -17 982.092 143.090   7
  -1  -3 -17 1331.10 167.831   8
   1  -3  17 1115.22 227.367   3
  -1  -3 -17 1029.25 187.285   2
  -1  -3 -18 1607.44 192.899   8
  -1  -3 -18 1731.43 192.288   7
  -1  -3 -19 464.120 104.369   7
  -1  -3 -19 536.209 113.498   8
  -1  -3 -20 680.732 132.612   8
  -1  -3 -20 411.698 108.356   7
  -1  -3 -21 232.665 85.2924   8
  -1  -3 -21 230.542 91.0364   7
  -1  -3 -22 3945.55 288.713   8
  -1  -3 -22 3841.76 274.923   7
  -1  -3 -23 1415.08 169.000   8
  -1  -3 -23 1099.71 143.347   7
  -1  -3 -24 327.350 87.7899   8
  -1  -3 -24 282.753 80.0640   7
  -1  -3 -25 908.658 110.651   7
  -1  -3 -25 1103.49 133.036   8
  -1  -3 -26 1258.69 114.214   7
  -1  -3 -26 1213.15 122.938   8
  -1  -3 -27 706.326 81.5659   8
  -1  -3 -27 637.124 65.4971   7
   1  -2 -28 853.475 91.2097   8
   1  -2 -28 859.351 95.1202   7
   1  -2 -27 291.535 71.3696   8
   1  -2 -27 247.186 68.1319   7
   1  -2 -26 1583.13 162.226   7
   1  -2 -26 1539.40 157.582   8
   1  -2 -25 516.900 101.970   8
   1  -2 -25 465.565 103.123   7
   1  -2 -24 1221.10 159.200   7
   1  -2 -24 1317.02 164.525   8
   1  -2 -23 605.647 122.492   7
   1  -2 -23 505.388 116.446   8
   1  -2 -22 3442.37 277.900   8
   1  -2 -22 3359.35 275.813   7
   1  -2 -21 182.224 90.3606   8
   1  -2 -21-10.5676 53.7056   7
   1  -2 -20 12161.9 520.105   7
   1  -2 -20 11806.4 510.446   8
   1  -2 -19 2401.01 225.510   8
  -1  -2  19 2339.47 308.678   3
   1  -2 -19 2049.09 234.224   2
   1  -2 -19 2400.12 229.198   7
   1  -2 -18 6628.88 363.966   7
   1  -2 -18 5550.62 417.201   2
   1  -2 -18 7103.11 374.088   8
  -1  -2  18 6139.12 507.601   3
  -1  -2  17 4050.92 410.118   3
   1  -2 -17 3679.18 336.546   1
   1  -2 -17 4003.67 343.043   2
   1  -2 -16 40331.2 1046.34   2
   1  -2 -16 42262.4 1106.50   1
  -1  -2  16 42538.6 1274.32   3
   1  -2 -15 3068.90 279.568   2
  -1  -2  15 2943.13 325.630   3
   1  -2 -15 2750.70 269.685   1
   1  -2 -14 7576.32 424.048   1
   1  -2 -14 7360.22 405.858   2
  -1  -2  14 7738.11 499.082   3
  -1  -2  13 4073.55 351.743   3
   1  -2 -13 4370.19 309.475   1
  -1  -2  12 199187. 2322.09   3
   1  -2 -12 195326. 1938.95   1
   1  -2 -11 334.041 80.2605   1
  -1  -2  11 486.825 119.017   3
  -1  -2  10 9932.39 466.465   3
   1  -2 -10 10060.9 394.103   1
   1  -2  -9 613.626 99.2592   1
  -1  -2   9 656.269 121.467   3
  -1  -2   8 66892.5 1075.79   3
   1  -2  -8 65719.5 898.730   1
  -1  -2   7 364.730 86.9144   3
   1  -2  -7 354.223 69.6496   1
  -1  -2   6 34259.5 671.477   3
   1  -2  -6 35021.0 599.384   1
  -1  -2   5 888.544 104.521   3
   1  -2  -5 1054.12 102.047   1
   1  -2  -4 19425.3 419.421   1
  -1  -2   4 19241.1 425.474   3
   1  -2  -3 1031.29 94.9508   1
  -1  -2   3 990.419 92.3649   3
   1  -2  -2 90994.0 818.731   1
  -1  -2   2 89895.9 722.561   3
  -1  -2   1 305.637 38.4131   3
  -1  -2   0 44087.0 314.601   3
  -1  -2  -1 67.9325 48.7412   1
   1  -2   1 120.752 41.5666   3
   1  -2   2 321824. 1642.00   3
  -1  -2  -2 323821. 1880.61   1
  -1  -2  -3 10186.1 356.572   1
   1  -2   3 9485.96 310.340   3
   1  -2   4 162699. 1394.08   3
  -1  -2  -4 161587. 1466.28   1
  -1  -2  -5 1696.71 161.671   1
   1  -2   5 1604.51 152.487   3
  -1  -2  -6 34203.7 718.467   1
   1  -2   6 35359.5 750.178   3
   1  -2   7 3086.36 239.163   3
  -1  -2  -7 3629.55 240.625   1
   1  -2   8 24854.7 703.758   3
  -1  -2  -8 23864.8 637.778   1
  -1  -2  -9 1615.57 173.909   1
   1  -2   9 1667.99 198.005   3
   1  -2  10 15236.4 611.330   3
  -1  -2 -10 15826.0 565.348   1
  -1  -2 -11 3275.24 271.282   1
   1  -2  11 3207.23 300.698   3
  -1  -2 -12 23463.0 752.833   1
   1  -2  12 23514.1 836.706   3
   1  -2  13 476.917 130.844   3
  -1  -2 -13 548.842 128.156   1
  -1  -2 -14 4620.31 366.858   1
   1  -2  14 3928.58 374.402   3
  -1  -2 -15 2049.88 262.518   1
   1  -2  15 1961.84 277.081   3
  -1  -2 -15 1614.26 230.420   2
  -1  -2 -16 227.037 60.2924   1
   1  -2  16 283.032 132.307   3
  -1  -2 -16 371.438 120.642   2
   1  -2  17 237.841 68.5763   3
  -1  -2 -17 483.218 125.534   2
  -1  -2 -17 571.978 110.190   7
  -1  -2 -17 794.649 137.548   8
  -1  -2 -17 943.564 197.422   1
  -1  -2 -18 1216.30 214.536   1
   1  -2  18 1902.06 301.629   3
  -1  -2 -18 1957.84 265.401   2
  -1  -2 -18 1811.02 200.639   7
  -1  -2 -18 1696.89 195.305   8
  -1  -2 -19 68.8807 64.2208   7
  -1  -2 -19 83.1110 68.4806   8
  -1  -2 -20 3145.35 268.952   8
  -1  -2 -20 2979.94 258.318   7
  -1  -2 -21 28.8044 52.8387   7
  -1  -2 -21 92.2445 73.9929   8
  -1  -2 -22 1420.72 181.114   8
  -1  -2 -22 1319.24 171.091   7
  -1  -2 -23 368.944 90.6855   7
  -1  -2 -23 434.603 108.104   8
  -1  -2 -24 3566.42 259.288   8
  -1  -2 -24 3860.93 267.993   7
  -1  -2 -25 96.3847 51.4401   8
  -1  -2 -25 282.809 76.6285   7
  -1  -2 -26 2930.31 198.054   7
  -1  -2 -26 2972.32 197.920   8
  -1  -2 -27 1357.12 117.796   8
  -1  -2 -27 1399.09 121.842   7
   1  -1 -28 718.172 86.7368   8
   1  -1 -28 974.137 108.457   7
   1  -1 -27 1659.66 158.514   7
   1  -1 -27 1536.88 140.582   8
   1  -1 -26 3661.26 238.335   8
   1  -1 -26 3828.89 257.124   7
   1  -1 -25 86.1769 57.9150   8
   1  -1 -25 136.045 71.0799   7
   1  -1 -24 5173.57 334.453   7
   1  -1 -24 5020.49 314.814   8
   1  -1 -23 437.030 109.188   8
   1  -1 -23 546.724 114.985   7
   1  -1 -22 330.542 109.279   8
   1  -1 -22 312.189 100.001   7
   1  -1 -21 325.118 98.2292   8
   1  -1 -21 372.492 100.981   7
   1  -1 -20 1655.94 262.761   2
   1  -1 -20 2111.95 215.790   8
   1  -1 -20 2170.85 224.952   7
   1  -1 -19 1269.86 161.642   8
  -1  -1  19 1431.09 242.182   3
   1  -1 -19 1332.63 170.837   7
   1  -1 -19 1341.39 221.489   2
   1  -1 -18 5190.97 320.324   7
  -1  -1  18 4755.40 436.871   3
   1  -1 -18 4779.16 400.142   2
   1  -1 -18 5028.01 307.208   8
  -1  -1  17 2429.84 305.610   3
   1  -1 -17 2488.84 271.807   2
   1  -1 -16 24086.8 828.471   2
  -1  -1  16 24283.7 923.638   3
   1  -1 -15 6501.69 416.981   1
   1  -1 -15 6811.32 414.127   2
  -1  -1  15 6049.42 447.880   3
  -1  -1  14 60165.8 1339.19   3
   1  -1 -14 59391.1 1162.32   2
   1  -1 -14 60533.5 1206.87   1
   1  -1 -13 1468.62 185.147   1
  -1  -1  13 1233.17 189.121   3
   1  -1 -13 1650.94 190.502   2
   1  -1 -12 15975.4 545.004   1
  -1  -1  12 15835.1 618.128   3
   1  -1 -12 15554.2 527.897   2
   1  -1 -11 1561.50 162.945   2
   1  -1 -11 1513.76 162.532   1
  -1  -1  11 1648.79 195.283   3
  -1  -1  10 74472.7 1196.90   3
   1  -1 -10 73853.7 1032.67   1
   1  -1  -9 6807.88 290.955   1
  -1  -1   9 5848.89 319.359   3
  -1  -1   8 11427.7 418.189   3
   1  -1  -8 11794.0 360.598   1
  -1  -1   7 3471.89 217.267   3
   1  -1  -7 4219.57 197.061   1
  -1  -1   6 46045.0 720.136   3
   1  -1  -6 48381.5 606.699   1
   1  -1  -5 1725.83 106.182   1
  -1  -1   5 1728.57 134.169   3
  -1  -1   3 3392.86 142.974   3
   1  -1  -3 4085.33 134.202   1
   1  -1  -2 177853. 804.393   1
  -1  -1   2 180272. 885.045   3
   1  -1  -1 51.5423 14.6636   1
  -1  -1   1 71.6653 17.7646   3
  -1  -1   0 131737. 446.242   3
  -1  -1   0 127481. 796.460   1
  -1  -1  -1 143.034 38.3846   1
  -1  -1  -2 83440.1 789.785   1
   1  -1   2 80982.9 718.434   3
  -1  -1  -3 4403.52 194.051   1
   1  -1   3 3973.26 180.674   3
   1  -1   4 369605. 1888.54   3
  -1  -1  -4 358217. 1814.90   1
  -1  -1  -5 11487.0 346.465   1
   1  -1   5 9726.92 336.777   3
  -1  -1  -6 142836. 1284.16   1
   1  -1   6 143915. 1393.36   3
  -1  -1  -7 6958.55 302.065   1
   1  -1   7 5615.86 298.365   3
   1  -1   8 67115.3 1081.38   3
  -1  -1  -8 66655.0 982.340   1
   1  -1   9 9923.71 442.862   3
  -1  -1  -9 11034.6 426.755   1
   1  -1  10 48515.4 1030.74   3
  -1  -1 -10 47392.7 931.235   1
  -1  -1 -11 84.8888 70.4058   1
   1  -1  11-43.3585 53.2934   3
   1  -1  12 57590.5 1243.47   3
  -1  -1 -12 57055.8 1144.24   1
  -1  -1 -13 13133.0 578.453   2
  -1  -1 -13 13041.6 578.989   1
   1  -1  13 11849.6 592.817   3
  -1  -1 -14 4891.87 373.146   1
   1  -1  14 5295.56 417.902   3
  -1  -1 -14 4855.74 367.197   2
  -1  -1 -15 4514.80 379.431   1
   1  -1  15 4011.85 376.346   3
  -1  -1 -15 4331.13 369.149   2
  -1  -1 -16 63071.8 1458.86   2
  -1  -1 -16 64617.5 1493.96   1
   1  -1  16 64550.2 1560.06   3
  -1  -1 -17 4747.19 298.791   8
   1  -1  17 5092.74 451.419   3
  -1  -1 -17 5452.44 323.353   7
  -1  -1 -17 5652.18 456.872   2
   1  -1  18 7670.26 564.780   3
  -1  -1 -18 7704.42 401.086   7
  -1  -1 -18 7285.49 533.294   2
  -1  -1 -18 7738.88 396.599   8
  -1  -1 -19 1753.78 206.091   7
  -1  -1 -19 933.187 184.782   2
   1  -1  19 1233.16 223.323   3
  -1  -1 -19 1605.95 192.044   8
  -1  -1 -20 3723.71 288.951   8
  -1  -1 -20 3931.84 306.278   7
  -1  -1 -21 851.539 145.825   8
  -1  -1 -21 690.319 134.999   7
  -1  -1 -22 2872.07 258.594   7
  -1  -1 -22 3031.11 260.213   8
  -1  -1 -23-56.5821 73.3456   7
  -1  -1 -23-31.7876 67.8317   8
  -1  -1 -24 562.621 110.972   8
  -1  -1 -24 575.201 118.419   7
  -1  -1 -25 238.162 77.9445   8
  -1  -1 -25 244.689 80.3601   7
  -1  -1 -26 1052.40 129.585   7
  -1  -1 -26 946.560 115.531   8
  -1  -1 -27 1256.79 125.607   7
  -1  -1 -27 1139.08 108.688   8
   1   0 -28 2047.95 125.805   8
   1   0 -28 2378.83 169.455   7
   1   0 -27 40.3724 52.4874   7
   1   0 -27-18.4183 36.8244   8
   1   0 -26 87.2287 55.8953   7
   1   0 -26 188.112 66.1439   8
   1   0 -25 668.208 127.183   7
   1   0 -25 640.810 108.771   8
   1   0 -24 2981.05 257.506   7
   1   0 -24 2774.73 231.480   8
   1   0 -23 1245.89 178.924   7
   1   0 -23 1384.02 169.090   8
   1   0 -22 770.874 145.824   7
   1   0 -22 762.643 135.210   8
   1   0 -21 706.195 142.782   7
   1   0 -21 726.759 130.036   8
   1   0 -20 4872.51 329.631   7
  -1   0  20 3956.34 380.209   3
   1   0 -20 4339.69 296.028   8
   1   0 -20 3913.81 386.217   2
  -1   0  19 377.495 145.111   3
   1   0 -19 579.949 109.494   8
   1   0 -19 494.470 108.839   7
   1   0 -18 34867.5 812.361   7
   1   0 -18 32852.8 1079.21   2
  -1   0  18 33399.6 1094.50   3
   1   0 -17 270.971 77.9528   2
  -1   0  17 351.643 136.779   3
  -1   0  16 1687.33 234.974   3
   1   0 -16 1635.72 220.262   2
   1   0 -15 60.4856 42.4974   2
  -1   0  15-72.0509 65.1544   3
  -1   0  14 26066.8 848.210   3
   1   0 -14 26662.5 803.348   2
  -1   0  13 594.361 131.479   3
   1   0 -13 434.305 103.464   2
   1   0 -12 2064.69 202.158   2
  -1   0  12 1928.73 215.506   3
   1   0 -11 26.6502 52.2127   1
   1   0 -11 47.4299 40.5164   2
  -1   0  11-50.9379 42.2138   3
  -1   0  10 13444.5 484.841   3
   1   0 -10 13695.2 445.116   2
   1   0 -10 13147.0 440.178   1
   1   0  -9 257.429 65.7610   1
  -1   0   9 200.145 58.8719   3
   1   0  -9 315.690 63.8034   2
   1   0  -8 884.809 100.710   2
  -1   0   8 729.984 104.253   3
   1   0  -8 856.695 102.592   1
   1   0  -7 1197.78 107.729   1
  -1   0   7 1011.22 109.833   3
   1   0  -7 1171.79 106.038   2
   1   0  -6 358.865 56.0135   1
  -1   0   6 327.305 62.3337   3
   1   0  -5 1021.83 78.9017   1
   1   0  -5 1070.12 80.3852   2
  -1   0   5 959.736 87.9141   3
   1   0  -4 5494.62 154.737   2
  -1   0   4 5064.94 179.658   3
   1   0  -4 5147.95 153.124   1
   1   0  -3 266.519 31.6431   1
   1   0  -3 238.600 27.7802   2
  -1   0   3 218.831 35.7316   3
  -1   0   2 70084.8 474.514   3
   1   0  -2 71716.0 370.649   2
  -1   0   1 397.665 30.5134   3
  -1   0   0 370150. 888.257   4
  -1   0  -1 72.4639 17.2089   1
  -1   0  -1 34.2774 11.2242   4
  -1   0  -2 109150. 658.241   1
  -1   0  -2 104205. 577.019   4
   1   0   3 7358.82 209.976   3
  -1   0  -3 7840.71 187.133   4
  -1   0  -4 67132.9 616.278   4
  -1   0  -4 68131.7 675.310   1
   1   0   5 11.4266 35.2823   3
  -1   0  -5 10.6888 20.9885   4
  -1   0  -5 48.3223 33.6756   1
  -1   0  -6 68337.8 821.766   1
   1   0   6 67595.0 875.464   3
  -1   0  -7 6943.41 287.030   1
   1   0   7 6151.77 288.489   3
   1   0   8 152714. 1535.77   3
  -1   0  -8 158258. 1462.45   1
   1   0   9 1429.10 162.813   3
  -1   0  -9 1783.05 171.110   1
  -1   0 -10 69024.9 1110.89   1
   1   0  10 65993.9 1136.33   3
  -1   0 -10 69827.4 1118.68   2
  -1   0 -11 13322.5 524.332   2
  -1   0 -11 13678.3 533.735   1
   1   0  11 12699.0 527.781   3
  -1   0 -12 33362.2 877.518   2
  -1   0 -12 33968.6 896.364   1
   1   0  12 32372.0 890.013   3
   1   0  13 8965.66 493.197   3
  -1   0 -13 9921.44 514.293   1
  -1   0 -13 9455.83 497.588   2
  -1   0 -14 187928. 2323.76   2
  -1   0 -14 184380. 2321.00   1
   1   0  14 190922. 2363.63   3
  -1   0 -15 6856.50 470.200   2
   1   0  15 7179.05 478.962   3
   1   0  16 4649.89 404.111   3
  -1   0 -16 4426.60 396.152   2
   1   0  17 2160.02 284.958   3
  -1   0 -17 2340.83 309.690   2
  -1   0 -18 34951.8 1199.54   2
  -1   0 -18 34009.3 804.047   8
   1   0  18 34147.1 1129.24   3
  -1   0 -18 36216.2 873.443   7
  -1   0 -19 4306.30 293.980   8
   1   0  19 4016.06 402.751   3
  -1   0 -19 4007.82 301.317   7
  -1   0 -19 3838.46 404.166   2
  -1   0 -20 661.338 135.636   7
  -1   0 -20 692.918 123.465   8
  -1   0 -21 525.912 120.071   7
  -1   0 -21 548.414 107.897   8
  -1   0 -22 1370.83 173.258   8
  -1   0 -22 1546.29 198.933   7
  -1   0 -23 312.681 101.841   7
  -1   0 -23 381.850 94.7980   8
  -1   0 -24 193.097 61.5769   8
  -1   0 -24 118.142 62.7404   7
  -1   0 -25-19.2032 59.4622   7
  -1   0 -25 41.6523 40.5637   8
  -1   0 -26 98.1103 41.9027   8
  -1   0 -26 32.9204 44.0857   7
  -1   0 -27 46.4903 34.6898   8
  -1   0 -27 89.5566 46.6987   7
  -1   0 -28 1860.00 129.182   7
   1   1 -28 717.611 94.0411   7
   1   1 -27 1556.99 151.970   7
   1   1 -26 3254.71 191.390   8
   1   1 -26 3611.33 248.738   7
   1   1 -25 44.2589 49.6234   7
   1   1 -25 126.863 53.9683   8
   1   1 -24 4863.32 322.257   7
   1   1 -24 4911.01 280.987   8
   1   1 -23 623.385 124.565   7
   1   1 -23 638.178 111.218   8
   1   1 -22 467.480 106.531   8
   1   1 -22 384.158 114.052   7
   1   1 -21 342.540 82.1278   8
   1   1 -21 308.989 98.2454   7
   1   1 -20 1966.27 190.259   8
   1   1 -20 1707.92 199.290   7
  -1   1  19 873.583 127.862   6
   1   1 -19 1048.78 137.394   8
   1   1 -19 1293.70 241.290   2
   1   1 -19 1127.21 160.091   7
   1   1 -18 4906.90 441.537   2
   1   1 -18 5417.43 323.440   7
  -1   1  17 2107.68 257.653   3
   1   1 -17 2479.20 305.206   2
  -1   1  16 24159.3 831.176   3
   1   1 -16 24344.1 896.686   2
  -1   1  15 6479.15 414.017   3
   1   1 -15 6588.76 444.068   2
  -1   1  14 59539.5 1199.91   3
   1   1 -14 59884.5 1261.64   2
   1   1 -13 1638.33 203.134   2
  -1   1  13 1151.94 164.089   3
  -1   1  12 15562.0 550.463   3
   1   1 -12 16963.2 600.158   2
  -1   1  11 1312.96 159.549   3
   1   1 -11 1575.57 176.725   2
  -1   1  10 68726.1 1030.99   3
   1   1 -10 69427.6 1065.76   2
   1   1  -9 6287.62 303.278   2
  -1   1   9 5947.32 282.028   3
  -1   1   8 13330.9 398.180   3
   1   1  -8 13202.6 409.723   2
   1   1  -7 3653.53 202.585   2
  -1   1   7 3803.80 195.140   3
   1   1  -6 47859.8 676.223   2
  -1   1   6 47601.5 617.451   3
  -1   1   5 1550.82 100.660   3
   1   1  -5 1736.79 121.317   2
  -1   1   3 3434.33 111.623   3
   1   1  -3 3578.28 148.290   2
  -1   1   3 3663.16 110.377   4
   1   1  -2 176158. 959.710   2
  -1   1   2 173734. 754.319   4
   1   1  -1 34.5944 20.1527   2
  -1   1   1 42.8931 16.0766   4
  -1   1   1 64.7749 14.2155   2
  -1   1   0 127763. 706.939   4
  -1   1   0 127080. 599.365   2
  -1   1  -1 107.073 24.1475   2
  -1   1  -1 60.9816 21.7414   4
   1   1   2 85360.3 460.668   3
  -1   1  -2 85529.6 706.338   4
  -1   1  -3 4292.55 178.384   4
   1   1   3 4202.38 130.095   3
  -1   1  -3 4437.67 165.860   2
   1   1   4 362576. 1437.31   3
  -1   1  -4 362155. 1651.59   2
  -1   1  -4 362407. 1751.37   4
  -1   1  -5 10394.6 310.753   2
  -1   1  -5 10868.4 310.956   1
  -1   1  -5 9667.84 309.671   4
   1   1   5 9673.55 267.952   3
  -1   1  -6 150389. 1265.12   1
  -1   1  -6 150436. 1276.52   2
   1   1   6 149667. 1165.84   3
  -1   1  -6 150647. 1308.97   4
  -1   1  -7 6539.50 287.173   1
  -1   1  -7 6300.71 286.487   2
   1   1   8 65568.5 923.553   3
  -1   1  -8 67350.6 985.722   1
  -1   1  -8 67631.3 999.960   2
  -1   1  -9 10170.8 417.016   2
   1   1   9 9769.09 382.076   3
   1   1  10 49333.9 917.323   3
  -1   1 -10 49304.3 978.530   2
   1   1  11-8.37067 38.7915   3
  -1   1 -11 5.95493 69.8853   2
  -1   1 -12 59780.0 1223.66   2
   1   1  12 58999.6 1134.32   3
  -1   1 -13 12111.7 581.471   2
   1   1  13 11832.4 530.188   3
   1   1  14 5475.11 382.341   3
  -1   1 -14 5080.02 396.320   2
   1   1  15 3845.47 329.878   3
  -1   1 -15 4116.24 376.989   2
   1   1  16 66385.0 1411.42   3
  -1   1 -16 63777.6 1555.51   2
  -1   1 -17 5032.30 453.085   2
  -1   1 -17 5873.96 341.467   7
  -1   1 -18 7146.38 357.054   8
  -1   1 -18 7737.36 407.560   7
  -1   1 -18 6971.83 555.968   2
  -1   1 -19 1712.08 184.548   8
  -1   1 -19 1695.19 206.061   7
  -1   1 -20 4358.79 293.533   8
  -1   1 -20 4160.46 318.787   7
  -1   1 -21 866.299 143.210   8
  -1   1 -21 990.456 159.506   7
  -1   1 -22 2048.89 220.775   7
  -1   1 -22 2089.42 203.869   8
  -1   1 -23 48.5036 41.8748   8
  -1   1 -23-24.1565 63.7203   7
  -1   1 -24 429.137 88.4284   8
  -1   1 -24 451.825 114.505   7
  -1   1 -25 225.915 65.2964   8
  -1   1 -25 143.514 69.6625   7
  -1   1 -26 774.450 86.2632   8
  -1   1 -26 937.886 124.798   7
  -1   1 -27 1167.13 119.932   7
   1   2 -28 739.464 81.3490   7
   1   2 -27 142.598 45.2929   7
   1   2 -26 1528.07 154.148   7
   1   2 -25 437.934 100.733   7
   1   2 -24 1158.74 155.190   7
   1   2 -23 573.145 118.809   7
   1   2 -22 3028.92 261.768   7
   1   2 -21 39.3518 72.9139   7
   1   2 -20 11449.7 495.452   7
  -1   2  19 2200.26 210.320   6
   1   2 -19 2135.62 296.393   2
   1   2 -19 2058.39 212.543   7
   1   2 -18 6078.42 343.496   7
  -1   2  18 6888.17 357.196   6
   1   2 -18 6337.07 512.537   2
   1   2 -17 4046.96 405.791   2
   1   2 -16 40393.3 1199.68   2
  -1   2  15 2578.96 236.772   3
   1   2 -15 2599.33 292.035   2
  -1   2  14 8005.71 402.589   3
   1   2 -14 8010.65 492.681   2
   1   2 -13 3823.46 322.847   2
  -1   2  13 4286.89 286.886   3
   1   2 -12 194693. 2195.19   2
  -1   2  12 196627. 1802.82   3
   1   2 -11 327.047 95.4701   2
  -1   2  11 299.434 68.6706   3
  -1   2  10 9267.52 345.794   3
   1   2 -10 9059.00 425.624   2
  -1   2  10 9472.12 268.226   4
   1   2  -9 673.682 119.594   2
  -1   2   9 780.850 97.1614   3
  -1   2   9 855.936 76.9907   4
  -1   2   8 67030.9 639.541   4
   1   2  -8 65844.7 1019.65   2
  -1   2   8 65376.0 783.470   3
  -1   2   7 420.495 60.6511   3
   1   2  -7 279.741 72.3574   2
  -1   2   7 341.376 47.7754   4
   1   2  -6 35243.8 679.676   2
  -1   2   6 34750.5 466.681   3
  -1   2   6 35313.5 409.965   4
  -1   2   5 1009.26 71.6934   3
   1   2  -5 999.186 115.566   2
  -1   2   5 974.929 63.7946   4
  -1   2   4 17663.3 268.299   4
   1   2  -4 16660.7 427.841   2
   1   2  -3 760.976 93.5995   2
  -1   2   3 949.365 65.2030   4
  -1   2   2 88481.1 651.834   4
  -1   2   2 89452.6 760.128   2
  -1   2   1 337.886 47.1351   4
   1   2  -1 321.615 61.1230   2
  -1   2   1 305.702 47.1251   2
  -1   2   0 43384.5 533.510   4
   1   2   0 43577.6 622.056   2
  -1   2   0 42486.7 530.115   2
  -1   2  -1 29.5522 24.0268   4
  -1   2  -1 90.9831 37.3594   2
   1   2   1 75.4486 31.0782   2
  -1   2  -2 317610. 1610.18   2
  -1   2  -2 318072. 1692.20   4
  -1   2  -3 8707.96 287.151   2
  -1   2  -3 9768.94 318.498   4
  -1   2  -4 161924. 1364.62   4
  -1   2  -4 162583. 1320.11   2
  -1   2  -5 1803.52 150.983   2
  -1   2  -5 1785.26 154.698   4
   1   2   5 1725.82 89.3004   3
  -1   2  -6 34384.6 690.793   2
   1   2   6 34582.4 468.502   3
  -1   2  -6 33851.6 696.127   4
  -1   2  -7 3343.87 228.907   2
   1   2   7 2898.70 152.315   3
  -1   2  -8 24715.0 660.147   2
   1   2   8 24465.3 494.441   3
   1   2   9 1580.60 137.355   3
  -1   2  -9 1710.28 188.899   2
  -1   2 -10 16111.1 598.814   2
   1   2  10 15902.9 466.243   3
   1   2  11 2830.57 211.471   3
  -1   2 -11 3132.35 283.437   2
  -1   2 -12 22582.2 792.497   2
   1   2  12 21337.1 606.494   3
   1   2  13 357.788 88.9973   3
  -1   2 -13 429.502 111.213   2
  -1   2 -14 4737.47 406.520   2
  -1   2 -15 1353.16 224.811   2
  -1   2 -16 122.677 49.0248   2
  -1   2 -17 762.167 133.277   7
  -1   2 -17 397.242 137.798   2
  -1   2 -18 1748.39 193.484   7
  -1   2 -18 1882.46 283.595   2
  -1   2 -19 139.500 72.6665   7
  -1   2 -20 3241.83 279.123   7
  -1   2 -21 43.8643 53.9824   7
  -1   2 -22 1343.08 181.164   7
  -1   2 -23 286.890 89.9018   7
  -1   2 -24 3503.30 257.843   7
  -1   2 -25 99.3356 54.7540   7
  -1   2 -26 2442.11 181.099   7
  -1   2 -27 1277.28 112.269   7
   1   3 -27 413.089 61.3292   7
   1   3 -26 728.474 98.3481   7
   1   3 -25-43.7856 45.7302   7
   1   3 -24 1730.55 173.354   7
   1   3 -23 753.962 128.048   7
   1   3 -22 544.732 114.655   7
   1   3 -21 271.630 96.9738   7
   1   3 -20 5836.63 344.326   7
  -1   3  19-36.6188 55.3075   6
   1   3 -19 17.4192 45.7233   7
  -1   3  18 15573.2 571.007   6
   1   3 -18 14887.4 527.450   7
   1   3 -18 15442.9 836.529   2
  -1   3  17 1093.15 145.167   6
   1   3 -17 753.961 194.144   2
   1   3 -16 16667.3 814.529   2
   1   3 -15 3069.10 337.155   2
   1   3 -14 36733.5 1115.73   2
   1   3 -13 196.517 88.9022   2
   1   3 -12 6087.33 417.914   2
   1   3 -11 321.231 96.5292   2
   1   3 -10 14795.0 596.963   2
   1   3  -9 2408.69 235.890   2
  -1   3   9 2608.40 146.456   3
   1   3  -8 24210.0 698.795   2
   1   3  -7 607.329 114.662   2
  -1   3   6 33679.5 342.969   4
   1   3  -6 35894.9 790.282   2
   1   3  -5 1826.05 176.313   2
  -1   3   5 1633.99 85.6170   4
   1   3  -4 14160.9 464.866   2
  -1   3   4 13957.7 269.861   4
   1   3  -3 450.194 81.9893   2
  -1   3   3 487.324 54.8138   4
  -1   3   2 9259.84 314.438   2
  -1   3   2 8852.40 253.093   4
   1   3  -2 9201.12 355.986   2
  -1   3   1 302.176 62.2822   2
  -1   3   1 348.822 58.0702   4
   1   3  -1 310.408 70.3343   2
  -1   3   0 61815.9 773.856   4
   1   3   0 61981.7 913.068   2
  -1   3   0 62165.1 828.269   2
   1   3   1 507.320 87.1745   2
  -1   3  -1 398.118 69.8584   2
  -1   3  -1 421.128 70.7210   4
  -1   3  -2 101590. 1117.05   4
  -1   3  -2 102690. 1128.25   2
  -1   3  -3 1951.95 166.113   2
  -1   3  -3 1960.20 162.701   4
  -1   3  -4 75244.8 1054.52   4
  -1   3  -4 75872.9 1059.26   2
  -1   3  -5 1002.12 130.302   2
  -1   3  -5 979.278 132.383   4
  -1   3  -6 18011.7 565.196   2
  -1   3  -7 3619.71 266.330   2
  -1   3  -8 6716.47 377.848   2
  -1   3  -9 138.900 53.5585   2
  -1   3 -10 9595.60 497.827   2
  -1   3 -11 727.099 143.551   2
  -1   3 -12 27361.5 926.224   2
  -1   3 -13 37.6972 79.4109   2
  -1   3 -14 4600.80 421.325   2
  -1   3 -15 5939.13 500.684   2
  -1   3 -16 26116.3 1076.34   2
  -1   3 -17 960.036 140.580   7
  -1   3 -17 980.481 210.662   2
  -1   3 -18 1556.89 184.347   7
  -1   3 -19 297.172 82.4940   7
  -1   3 -20 518.735 120.618   7
  -1   3 -21 241.094 87.0699   7
  -1   3 -22 3589.38 271.910   7
  -1   3 -23 1090.39 147.048   7
  -1   3 -24 275.973 78.6394   7
  -1   3 -25 1027.74 120.065   7
   1   3  26 1277.96 113.780   5
  -1   3 -26 1088.67 104.268   7
  -1   4  27 20.5832 32.3528   5
  -1   4  18 5536.09 349.973   6
   1   4 -17 527.312 166.135   2
  -1   4  17 314.438 104.565   6
   1   4 -16 5520.63 495.095   2
  -1   4  16 6361.93 360.967   6
   1   4 -15 1750.06 268.082   2
   1   4 -14 5600.86 469.824   2
   1   4 -13 231.140 87.6714   2
   1   4 -12 18372.4 788.006   2
   1   4 -11 817.676 162.248   2
   1   4 -10 4040.79 349.021   2
   1   4  -9 1315.98 186.933   2
   1   4  -8 2624.51 260.532   2
   1   4  -7 178.938 95.7615   2
   1   4  -6 2336.30 234.691   2
   1   4  -5 471.687 115.050   2
  -1   4   4 13966.5 310.827   4
   1   4  -4 14004.9 530.530   2
   1   4  -3 299.176 85.8898   2
  -1   4   3 390.788 60.5837   4
  -1   4   2 36064.0 747.386   2
  -1   4   2 34033.7 578.599   4
   1   4  -2 34482.8 805.958   2
  -1   4   1 17.6709 23.8854   4
   1   4  -1 43.4036 57.3215   2
  -1   4   1 25.2938 38.4181   2
  -1   4   0 1335.22 133.233   4
   1   4   0 1061.20 144.152   2
  -1   4   0 1127.65 142.209   2
   1   4   1 212.569 71.2916   2
  -1   4  -1 190.508 73.5022   2
  -1   4  -1 290.066 73.6736   4
  -1   4  -2 20241.7 594.892   2
  -1   4  -2 20233.0 558.296   4
  -1   4  -3 122.600 60.5584   2
  -1   4  -3 161.548 66.2545   4
  -1   4  -4 86545.7 1307.85   2
  -1   4  -5 1008.11 150.543   2
  -1   4  -6 12287.9 527.369   2
  -1   4  -7 1213.02 178.000   2
  -1   4  -8 26423.8 837.286   2
  -1   4  -9 1431.39 214.317   2
  -1   4 -10 58021.5 1343.86   2
  -1   4 -11 4107.75 379.677   2
  -1   4 -12 25700.9 977.039   2
  -1   4 -13 161.398 141.202   2
  -1   4 -14 52859.5 1509.63   2
  -1   4 -15 4541.91 456.047   2
  -1   4 -16-271.151 124.562   2
  -1   4 -17 269.382 68.7280   7
  -1   4 -18 15944.4 561.803   7
  -1   4 -19 976.082 145.682   7
  -1   4 -20 7217.71 376.000   7
  -1   4 -21 1594.37 176.131   7
  -1   4 -22 1665.74 169.715   7
  -1   4 -23 98.4379 55.1112   7
  -1   4 -24 1518.11 132.766   7
   1   4  25 1060.93 117.948   5
   1   4  26 417.028 65.5898   5
  -1   5  26 1951.83 138.010   5
  -1   5  25 60.2087 49.9102   5
  -1   5  17 246.559 52.9471   9
  -1   5  16 9839.52 397.111   9
  -1   5  16 10262.3 468.312   6
  -1   5  15 2277.06 194.825   9
   1   5 -15 2568.30 349.859   2
  -1   5  15 2290.15 217.705   6
   1   5 -14 19673.3 932.563   2
  -1   5  14 19246.4 552.222   9
  -1   5  14 19520.9 607.447   6
   1   5 -13-34.8676 144.857   2
   1   5 -12 254.050 114.912   2
   1   5 -11 131.833 142.095   2
   1   5 -10 33825.4 1094.67   2
   1   5  -9 1212.41 206.296   2
   1   5  -8 18133.4 760.021   2
   1   5  -7 1017.18 184.012   2
   1   5  -6 1781.34 226.351   2
   1   5  -5 1240.56 194.937   2
   1   5  -4 55738.2 1210.52   2
   1   5  -3 1115.98 172.297   2
   1   5  -2 66296.6 1289.15   2
   1   5  -1 126.939 64.6545   2
  -1   5   1 97.8071 42.0905   2
  -1   5   0 69136.3 1236.81   2
   1   5   0 71630.2 1310.20   2
   1   5   1 1046.63 159.052   2
  -1   5  -1 951.310 151.355   2
  -1   5  -2 11005.6 505.194   2
  -1   5  -3 270.641 67.3466   2
  -1   5  -4 5098.97 361.757   2
  -1   5  -5 819.358 151.257   2
  -1   5  -6 36146.9 1017.78   2
  -1   5  -7 521.399 136.566   2
  -1   5  -8 10441.7 586.121   2
  -1   5  -9 3839.31 367.710   2
  -1   5 -10 29223.0 1045.61   2
  -1   5 -11 523.759 154.333   2
  -1   5 -12 13654.9 765.271   2
  -1   5 -13 3150.41 387.468   2
   1   5  14 146.770 51.9571   9
  -1   5 -14 264.225 118.089   2
  -1   5 -15 7342.90 599.422   2
   1   5  23 500.081 99.7962   5
   1   5  24 1515.47 141.289   5
   1   5  25 47.7743 38.7322   5
  -1   6  25 177.426 47.8402   5
  -1   6  24 374.260 80.7079   5
  -1   6  23 199.137 66.1732   5
  -1   6  21 368.682 71.6407  12
  -1   6  18 2220.74 184.442   9
  -1   6  17 427.856 95.0194   9
  -1   6  16 4945.26 296.134   9
  -1   6  15 499.592 103.385   9
  -1   6  14 638.538 123.945   6
  -1   6  14 819.165 131.489   9
  -1   6  13 1826.68 188.148   9
  -1   6  13 1960.63 199.183   6
   1   6 -13 1851.00 298.958   2
   1   6 -12 40555.2 1346.77   2
  -1   6  12 39149.5 819.232   6
  -1   6  12 40713.2 844.532   9
   1   6 -11 1087.72 215.234   2
  -1   6  11 889.425 127.024   9
   1   6 -10 11067.1 679.788   2
   1   6  -9 714.458 177.700   2
   1   6  -8 25776.0 990.945   2
   1   6  -7 261.118 91.1186   2
   1   6  -6 57517.0 1429.56   2
   1   6  -5 127.688 116.264   2
   1   6  -4 57846.8 1390.71   2
   1   6  -3-54.1845 81.8123   2
   1   6  -2 96200.9 1738.62   2
   1   6  -1 335.369 116.844   2
  -1   6   0 2394.34 265.335   2
   1   6   0 2164.02 261.259   2
  -1   6  -1 440.784 132.253   2
  -1   6  -2 34284.5 1015.64   2
  -1   6  -3 937.307 172.858   2
  -1   6  -4 3633.67 344.851   2
  -1   6  -5 1993.90 263.733   2
  -1   6  -6 2213.23 276.451   2
  -1   6  -7 214.848 123.742   2
  -1   6  -8 21907.3 921.847   2
  -1   6  -9 1830.46 273.211   2
  -1   6 -10 28193.3 1104.95   2
   1   6  10 30369.1 701.739   9
   1   6  11 918.589 132.183   9
  -1   6 -11 764.462 175.760   2
   1   6  12 3973.70 259.966   9
  -1   6 -12 4369.14 462.764   2
   1   6  13 934.899 133.775   9
  -1   6 -13 1029.13 228.923   2
   1   6  14 3681.75 253.412   9
   1   6  15 1325.61 147.847   9
   1   6  16 2005.04 173.345   9
   1   6  17 83.8047 65.4766  12
   1   6  18 3929.28 229.382  12
   1   6  20 2394.47 223.373   5
   1   6  21 188.310 74.7622   5
   1   6  22 93.0725 57.3458   5
  -1   6 -23 74.7700 41.4263  14
   1   6  23 25.6808 41.5399   5
   1   6  24 744.735 88.5544   5
  -1   6 -24 857.187 80.8834  14
  -1   7  23 63.4835 41.5157   5
  -1   7  22 47.0493 50.9859   5
  -1   7  21 150.299 68.8814   5
  -1   7  21 105.026 45.7039  12
  -1   7  20 2188.64 158.526  12
  -1   7  20 2370.17 214.630   5
  -1   7  19 145.179 62.6301  12
  -1   7  19 26.4087 34.6602   9
  -1   7  19 177.360 90.4639   5
  -1   7  18 6260.15 296.815   9
  -1   7  18 6561.35 385.311   5
  -1   7  18 6484.03 312.596  12
  -1   7  17 924.943 129.272   9
  -1   7  17 870.463 152.549   5
  -1   7  16 4542.34 279.608   9
  -1   7  15 998.952 146.041   9
  -1   7  14 30518.9 755.070   9
  -1   7  13 1450.63 168.037   9
  -1   7  12 4328.83 327.499   5
  -1   7  12 4194.28 286.434   9
  -1   7  11 218.840 80.8828   9
  -1   7  11 98.5207 82.4958   5
  -1   7  10 11385.0 511.300   5
  -1   7  10 11980.7 478.581   9
   1   7 -10 12275.0 753.928   2
   1   7  -9 808.038 197.508   2
  -1   7   9 558.883 122.017   5
  -1   7   9 558.828 103.763   9
  -1   7   8 21774.0 623.408   9
   1   7  -8 21848.5 989.665   2
  -1   7   8 21168.3 659.527   5
   1   7  -7 1308.89 260.823   2
  -1   7   7 934.312 132.700   9
   1   7  -6 21457.3 949.504   2
   1   7  -5 81.7407 72.5339   2
   1   7  -4 65690.4 1608.61   2
   1   7  -3-8.74283 74.9431   2
   1   7  -2 12745.0 688.071   2
  -1   7  -1 88.0578 81.7385   2
  -1   7  -2 18389.1 811.334   2
  -1   7  -3 689.412 152.767   2
  -1   7  -4 22948.0 946.012   2
   1   7   5 14.4703 46.3498  12
  -1   7  -5 133.070 86.4592   2
   1   7   6 12323.8 452.300   9
  -1   7  -6 11871.0 701.240   2
   1   7   6 11766.0 449.125  12
  -1   7  -7 861.591 182.378   2
   1   7   7 781.244 129.569  12
   1   7   7 1065.86 142.717   9
   1   7   7 671.386 125.729   5
   1   7   8 7767.15 373.740  12
   1   7   8 7936.09 375.242   9
   1   7   8 7856.22 421.955   5
  -1   7  -8 7111.28 563.772   2
   1   7   9 387.834 93.1659  12
  -1   7  -9 629.207 156.720   2
   1   7   9 326.049 99.5979   5
   1   7   9 425.933 100.837   9
   1   7  10 12541.1 478.847   9
   1   7  10 11419.0 454.619  12
   1   7  10 11721.2 526.849   5
  -1   7 -10 11430.2 737.323   2
   1   7  11 522.852 104.160   9
   1   7  11 339.411 108.441   5
   1   7  11 526.491 103.011  12
   1   7  12 494.275 119.165   5
   1   7  12 420.326 104.362   9
   1   7  12 308.530 75.0384  12
   1   7  13 489.895 116.704   5
   1   7  13 645.076 118.774   9
   1   7  13 488.130 109.256  12
   1   7  14 111.201 59.0366   9
   1   7  14 78.6108 91.2977   5
   1   7  14 145.603 62.1794  12
   1   7  15 53.1987 64.0432   5
   1   7  15 204.380 70.2108   9
   1   7  15 116.514 66.7941  12
   1   7  16 1067.87 132.695  12
   1   7  16 940.516 156.011   5
   1   7  16 1085.95 130.154   9
   1   7  17-10.2088 42.5152  12
   1   7  17 6.28762 66.6509   5
   1   7  17 21.1738 41.0928   9
   1   7  18 733.413 97.0776  12
   1   7  18 925.869 140.291   5
   1   7  18 921.043 101.159   9
  -1   7 -19-3.89459 52.1566  14
   1   7  19 162.248 51.4976  12
   1   7  19 18.2416 54.1661   5
   1   7  20 206.079 74.9921   5
  -1   7 -20 177.131 57.0664  14
  -1   7 -21 215.190 47.0936  14
   1   7  21 220.025 64.3740   5
   1   7  22 1017.79 107.849   5
  -1   7 -22 862.095 76.4112  14
  -1   8  21-27.1430 39.0048   5
  -1   8  20 42.8464 31.3822  12
  -1   8  20 17.5162 24.5197   9
  -1   8  20 23.8772 45.4854   5
  -1   8  19 480.820 92.4810   5
  -1   8  19 656.895 77.9867   9
  -1   8  19 638.487 87.4779  12
  -1   8  18 5765.18 267.059  12
  -1   8  18 5671.64 315.596   5
  -1   8  18 5637.74 250.517   9
  -1   8  17 42.2926 53.9536  12
  -1   8  17 108.995 75.8669   5
  -1   8  17 73.7739 58.9642   9
  -1   8  16 7719.53 348.356  12
  -1   8  16 7503.23 334.817   9
  -1   8  16 7250.12 391.739   5
  -1   8  15 89.7954 77.0801   5
  -1   8  15 143.727 68.1026   9
  -1   8  15 130.852 67.6890  12
  -1   8  14 2252.61 202.240   9
  -1   8  14 2243.70 206.098  12
  -1   8  14 2178.99 227.988   5
  -1   8  13 967.821 146.219  12
  -1   8  13 1123.28 153.712   9
  -1   8  13 858.078 148.397   5
  -1   8  12 4570.56 303.088  12
  -1   8  12 4785.22 304.497   9
  -1   8  12 3867.04 312.336   5
  -1   8  11 76.7502 68.9423   9
  -1   8  11 28.3404 64.6349  12
  -1   8  11 26.9136 67.7245   5
  -1   8  10 3325.09 264.065  12
  -1   8  10 3482.65 265.080   9
  -1   8  10 3500.09 288.403   5
  -1   8   9 60.0474 71.6021  12
  -1   8   9 221.972 73.4559   9
  -1   8   9 223.010 73.8470   5
  -1   8   8 1352.37 169.636   9
  -1   8   8 1434.41 186.096   5
   1   8  -8 1540.14 158.979  11
  -1   8   8 1300.45 168.082  12
   1   8  -7-70.2663 57.2880  11
  -1   8   7-45.7029 73.9530  12
  -1   8   7-46.0677 50.4180   9
  -1   8   6 701.353 130.745  12
  -1   8   6 786.785 127.242   9
  -1   8   5 380.749 96.4579  12
  -1   8   5 432.909 97.9729   9
   1   8  -4 19941.6 930.813   2
  -1   8   4 18816.8 581.233   9
  -1   8   4 19879.5 625.316  12
  -1   8   3 217.711 68.3837  12
  -1   8   3 202.845 69.8221   9
  -1   8   2 8102.48 396.378  12
  -1   8   2 6844.45 338.926   9
   1   8  -2 7529.13 335.513   9
   1   8  -1 384.917 79.1797   9
  -1   8   1 346.003 82.9982   9
  -1   8   1 382.171 98.9334  12
   1   8  -1 389.983 88.7629  12
  -1   8   0 22372.0 643.735  12
   1   8   0 21765.7 591.164   9
   1   8   0 22716.5 659.050  12
  -1   8   0 21557.7 573.119   9
   1   8   1 45.7553 50.9963   9
  -1   8  -1 23.8212 63.7534  12
   1   8   1 27.9432 53.1339  12
   1   8   2 11429.9 441.992   9
   1   8   2 11582.3 478.416  12
   1   8   3 34.6846 50.9976  12
   1   8   3 100.896 65.0172   9
   1   8   4 6421.03 366.274   5
   1   8   4 6538.76 343.267   9
   1   8   4 6859.67 368.131  12
   1   8   5-3.25643 79.5229   5
   1   8   5 77.5991 60.4185  12
   1   8   5 78.5123 58.3013   9
   1   8   6 9441.06 462.297   5
   1   8   6 9799.02 426.763   9
   1   8   6 9641.09 433.100  12
   1   8   7 1721.87 187.319   9
   1   8   7 1463.96 192.039   5
   1   8   7 1482.33 173.438  12
   1   8   8 1210.30 162.814  12
   1   8   8 1403.72 169.134   9
   1   8   8 1491.19 191.249   5
   1   8   9 84.9098 54.5063   9
   1   8   9 154.983 58.9881  12
   1   8   9 113.146 74.6898   5
   1   8  10 6220.65 391.754   5
   1   8  10 6819.76 362.094  12
   1   8  10 6689.49 354.358   9
   1   8  11 582.175 131.462   5
   1   8  11 505.766 108.440  12
   1   8  11 438.584 98.4163   9
   1   8  12 487.065 103.911   9
   1   8  12 406.178 96.4201  12
   1   8  12 456.622 119.122   5
   1   8  13 213.341 76.2895  12
   1   8  13 152.537 50.0962   9
   1   8  13 349.470 104.344   5
   1   8  14 8968.45 378.739   9
   1   8  14 9032.62 445.708   5
   1   8  14 8588.79 368.711  12
   1   8  15 519.779 115.152   5
   1   8  15 453.409 92.9336   9
   1   8  15 516.834 94.9933  12
   1   8  16 735.304 100.693   9
   1   8  16 455.011 103.848   5
   1   8  16 683.262 97.2137  12
   1   8  17 419.641 72.1116   9
   1   8  17 382.750 95.8351   5
   1   8  17 451.199 76.6824  12
   1   8  18 1215.47 105.210  12
   1   8  18 1257.00 104.142   9
   1   8  18 1251.91 144.714   5
   1   8  19 81.8678 43.6894   5
   1   8  20 1724.36 138.017   5
  -1   9  19-8.75413 27.0164   5
  -1   9  19 111.279 29.8666  12
  -1   9  18 50.5834 34.1779  12
  -1   9  18 2.07161 26.9280   9
  -1   9  18-5.84618 33.1090   5
  -1   9  17 180.498 62.2399   5
  -1   9  17 169.055 47.3827   9
  -1   9  17 155.850 50.4055  12
  -1   9  16 2316.04 163.403   9
  -1   9  16 2416.71 190.798   5
  -1   9  16 2411.02 172.318  12
  -1   9  15 27.4259 50.9457   5
  -1   9  15 79.2838 46.4247  12
  -1   9  15-20.8681 50.2056   9
  -1   9  14 936.061 136.357   5
  -1   9  14 1419.47 153.590  12
  -1   9  14 1306.50 139.929   9
  -1   9  13-95.4834 63.9722  12
  -1   9  13 55.0030 50.4168   9
  -1   9  13-55.0923 69.8199   5
  -1   9  12 67.5788 61.8408   5
  -1   9  12 314.449 83.9100   9
  -1   9  12 279.327 91.9149  12
  -1   9  11 95.7981 70.0619  12
  -1   9  11 46.0518 50.7535   9
  -1   9  11 45.7829 52.4265   5
  -1   9  10 4614.46 300.915  12
  -1   9  10 4440.41 299.081   5
  -1   9  10 4774.78 295.480   9
  -1   9   9 160.332 69.3581  12
  -1   9   9 22.8575 60.6790   9
  -1   9   8 668.073 117.548   9
  -1   9   8 758.981 132.608  12
   1   9  -8 805.132 113.962  11
  -1   9   7 21.6975 56.1606  12
  -1   9   7-9.56266 57.6578   9
   1   9  -7-7.35811 56.7761  11
  -1   9   6 5064.89 329.532  12
  -1   9   6 4817.56 301.856   9
   1   9  -6 5016.47 289.023  11
   1   9  -5-54.8538 68.1397  11
  -1   9   5 30.0994 56.0889  12
  -1   9   5 114.455 65.7571   9
  -1   9   4 412.548 98.0780   9
  -1   9   4 372.406 99.3013  12
  -1   9   3 15.7619 71.0700  12
  -1   9   3 35.8325 57.6332   9
  -1   9   2 8112.96 411.059  12
   1   9  -2 8178.40 356.988   9
  -1   9   2 7592.45 364.072   9
   1   9  -1 355.423 100.150   9
  -1   9   1 224.421 76.1644   9
  -1   9   1 183.434 85.0768  12
  -1   9   0 9873.60 394.857   9
   1   9   0 9463.76 403.148   9
   1   9   1 154.244 73.4743   9
   1   9   2 3543.93 256.663   9
   1   9   2 3893.19 288.064  12
   1   9   3 133.678 78.8837  12
   1   9   3 120.729 68.2867   9
   1   9   4 1192.17 160.489  12
   1   9   4 1247.37 157.880   9
   1   9   4 1339.80 165.009   5
   1   9   5-21.3158 60.7378   9
   1   9   5 81.0058 58.4272  12
   1   9   5-31.5483 68.9535   5
   1   9   6 11124.9 475.612  12
   1   9   6 11051.5 452.243   9
   1   9   6 11262.0 488.577   5
   1   9   7 333.263 92.1075  12
   1   9   7 169.822 80.8478   5
   1   9   7 328.176 100.354   9
   1   9   8 9120.98 445.503   5
   1   9   8 9135.21 407.765   9
   1   9   8 9349.92 422.377  12
   1   9   9 310.138 86.0301  12
   1   9   9 191.446 65.9455   5
   1   9   9 311.147 89.5390   9
   1   9  10 8532.89 426.879   5
   1   9  10 8835.90 395.869  12
   1   9  10 9293.88 398.271   9
   1   9  11 697.375 114.510   9
   1   9  11 718.567 119.458  12
   1   9  11 816.779 142.744   5
   1   9  12 4215.23 252.397   9
   1   9  12 4125.13 254.226  12
   1   9  12 4179.55 286.336   5
   1   9  13 472.673 91.0838   9
   1   9  13 270.592 85.4295   5
   1   9  13 400.049 88.5862  12
   1   9  14 592.829 89.8609  12
   1   9  14 615.248 91.2547   9
   1   9  14 555.158 108.371   5
   1   9  15 67.6712 41.8094   9
   1   9  15-15.0162 38.6252  12
   1   9  15 30.1087 44.5499   5
   1   9  16 3301.09 210.182   5
   1   9  16 3340.45 175.154   9
   1   9  16 3210.06 172.958  12
   1   9  17 482.061 80.0536   5
   1   9  17 645.233 69.5853   9
   1   9  18 806.830 87.9546   5
  -1  10  16 730.448 72.4477   9
  -1  10  15-16.0186 28.6186   9
  -1  10  15-42.8128 36.0648  12
  -1  10  14 1543.89 125.304   9
  -1  10  14 1532.44 131.343  12
  -1  10  13 120.932 51.2696   9
  -1  10  13-22.9499 51.3022  12
  -1  10  12 6016.03 284.727  12
  -1  10  12 5808.25 267.754   9
  -1  10  11 15.1238 47.7152  12
  -1  10  11-73.9220 59.0182   9
  -1  10  10 3326.71 219.677   9
  -1  10  10 3768.99 247.224  12
  -1  10   9 40.1434 56.7680  12
  -1  10   9 27.6241 50.3862   9
  -1  10   8 6506.64 338.563  12
  -1  10   8 6776.94 323.412   9
   1  10  -7 158.019 62.8474  11
  -1  10   7 159.119 68.2911   9
  -1  10   7 69.5678 65.5957  12
  -1  10   6 10908.6 451.120  12
  -1  10   6 10454.9 407.594   9
   1  10  -6 9746.30 356.488  11
   1  10  -5-12.7353 54.8382  11
  -1  10   5 57.4451 72.1018  12
  -1  10   5 129.681 66.7281   9
  -1  10   4 1956.98 179.164   9
   1  10  -4 2141.15 185.934  11
  -1  10   3 55.9678 43.8887   9
   1  10  -3 17.9391 62.9726  11
  -1  10   2 5589.89 292.494   9
  -1  10   1 54.0155 46.6368   9
   1  10  -1 77.4894 50.2298   9
   1  10   0 1254.33 143.205   9
   1  10   1-110.680 57.4595   9
   1  10   2 6807.57 328.949   9
  -1  10  -3 245.161 70.6158  11
   1  10   3 110.702 54.8669   9
   1  10   4 2547.08 205.217   9
   1  10   5 214.249 76.5600   9
   1  10   6 488.489 93.2779   9
   1  10   7 274.570 74.2752   9
   1  10   7 258.984 73.5060   5
   1  10   8 5667.46 293.996   5
   1  10   8 5290.65 282.778   9
   1  10   9 470.537 94.5819   5
   1  10   9 545.195 94.3951   9
   1  10  10 1217.11 131.973   9
   1  10  10 1295.06 142.389   5
   1  10  11 102.208 54.0142   9
   1  10  11 15.9238 45.4388   5
   1  10  12 623.858 92.5441   5
   1  10  12 793.447 98.5053   9
   1  10  13 233.297 62.3821   5
   1  10  13 231.321 56.0705   9
   1  10  14 3775.18 179.451   5
   1  10  14 4149.89 184.348   9
   1  10  15 146.472 36.5785   9
   1  10  15 61.4350 29.1591   5
  -1  11  11 208.208 48.2623   9
  -1  11  10 7327.33 254.548   9
  -1  11   9 93.5820 45.7791   9
  -1  11   8 1575.20 130.187   9
  -1  11   7 67.7108 38.4186   9
  -1  11   6 3990.36 209.256   9
   1  11  -5 242.526 58.3803  11
  -1  11   5 121.990 44.5454   9
   1  11  -4 4286.02 205.791  11
  -1  11   4 4151.11 214.959   9
   1  11  -3 80.8197 50.9615  11
  -1  11   3-77.2593 45.4378   9
   1  11  -2 1145.28 120.283  11
  -1  11   2 1110.50 109.899   9
   1  11  -1 8.39167 47.0849  11
   1  11   0 7889.42 281.157   9
  -1  11   0 8097.67 294.675  11
   1  11   0 8016.52 320.451  11
   1  11   1 84.8628 38.5525   9
  -1  11  -1 166.010 51.0367  11
   1  11   2 1052.38 111.699   9
  -1  11  -2 1006.10 96.1738  11
   1  11   3 15.6871 36.6703   9
   1  11   4 4945.34 237.638   9
   1  11   5 116.040 50.8185   9
   1  11   6 774.823 95.7953   9
   1  11   7 45.6301 37.4182   9
   1  11   8 1899.30 137.767   9
   1  11   9-1.05861 38.4466   9
   1  11  10 455.073 65.8399   9
  -2  -8   5 632.495 151.352   1
  -2  -8   4 14632.5 840.599   1
  -2  -8   3-931.352 215.531   1
  -2  -8   2 7309.71 601.372   1
  -2  -8   1-154.815 85.5203   1
  -2  -8   0 13103.7 788.474   1
  -2  -8  -1 1137.83 236.507   1
  -2  -8  -2 12127.6 756.894   1
  -2  -8  -3 33.4963 45.2758   1
  -2  -7   7 26.9410 127.218   1
  -2  -7   6 17885.9 886.297   1
  -2  -7   5 414.960 97.9401   1
  -2  -7   4 52626.7 1505.61   1
  -2  -7   3-221.118 107.635   1
  -2  -7   2 19225.5 901.831   1
  -2  -7   1 604.265 150.703   1
  -2  -7   0 56849.6 1556.36   1
  -2  -7  -1 128.909 87.6801   1
  -2  -7  -2 5167.16 473.993   1
   2  -7   2 4540.72 406.319   1
  -2  -7  -3 1478.67 273.821   1
   2  -7   3 598.435 131.066   1
  -2  -7  -4 49905.6 1456.50   1
   2  -7   4 48378.2 1381.55   1
   2  -7   5 171.323 63.7611   1
  -2  -7  -5 42.8299 115.107   1
  -2  -7  -6 21446.1 938.601   1
  -2  -7  -7 892.398 186.443   1
  -2  -7  -8 1853.48 279.102   1
  -2  -7  -9 1058.15 214.580   1
   2  -6 -25 38.5382 29.6346   8
   2  -6 -24 1439.95 118.437   8
   2  -6 -23 132.818 49.0365   8
   2  -6 -22 830.628 108.723   8
   2  -6 -21 163.329 52.4440   8
   2  -6 -20 6516.52 327.068   8
   2  -6 -19 32.4680 51.2376   8
   2  -6 -18 281.232 75.0196   8
   2  -6 -17 368.395 104.098   8
   2  -6 -16 2443.87 200.525   8
  -2  -6  14 13113.5 675.638   3
  -2  -6  13 656.280 161.463   3
  -2  -6  12 1860.32 248.521   3
   2  -6  -6 14936.8 603.236   1
   2  -6  -5 174.205 75.1900   1
   2  -6  -4 1984.26 215.616   1
  -2  -6   4 2114.45 276.832   1
   2  -6  -3 412.367 125.090   1
  -2  -6   3 190.315 58.0079   1
   2  -6  -2 41449.2 1052.28   1
  -2  -6   2 39691.2 1170.29   1
  -2  -6   1 169.333 93.3729   1
   2  -6  -1 18.7432 54.2892   1
   2  -6   0 9263.66 507.000   1
  -2  -6   0 9482.76 576.389   1
  -2  -6  -1 558.629 157.502   1
   2  -6   1 275.583 85.8955   1
  -2  -6  -2 164142. 2424.73   1
   2  -6   2 160311. 2227.03   1
  -2  -6  -3 2959.65 339.587   1
  -2  -6  -4 21562.0 898.097   1
  -2  -6  -5 1615.58 251.236   1
   2  -6   6 33486.9 923.189   3
  -2  -6  -6 34408.4 1126.87   1
  -2  -6  -7 723.175 173.572   1
   2  -6   7 674.711 135.569   3
  -2  -6  -8 45547.0 1291.32   1
   2  -6   8 44912.1 1182.31   3
   2  -6   9 6564.54 471.391   3
  -2  -6  -9 6958.23 504.318   1
  -2  -6 -10 6948.50 506.653   1
   2  -6  10 6335.74 474.498   3
  -2  -6 -11 2731.73 318.236   1
   2  -6  11 2285.28 296.549   3
   2  -6  12 12088.3 694.329   3
  -2  -6 -12 11596.8 638.206   1
  -2  -6 -16 9144.03 386.341   8
  -2  -6 -17 966.228 131.344   8
  -2  -6 -18 169.304 62.0317   8
  -2  -6 -19 512.050 94.0885   8
  -2  -6 -20 1217.38 127.804   8
  -2  -6 -21 101.305 44.3993   8
  -2  -6 -22 1367.99 114.357   8
  -2  -6 -23 34.9418 29.2487   8
   2  -5 -26 2060.39 139.325   8
   2  -5 -25 116.303 43.1745   7
   2  -5 -25 92.3628 50.6199   8
   2  -5 -24 306.628 74.4029   8
   2  -5 -24 349.024 63.6305   7
   2  -5 -23 240.643 61.6012   7
   2  -5 -23 339.285 83.8463   8
   2  -5 -22 7733.40 370.024   8
   2  -5 -22 7202.29 322.289   7
   2  -5 -21 203.473 72.4011   8
   2  -5 -21 96.3165 42.6211   7
   2  -5 -20 1109.64 141.478   7
   2  -5 -20 1006.14 150.669   8
   2  -5 -19 676.824 114.565   7
   2  -5 -19 710.211 134.004   8
   2  -5 -18 5021.31 313.966   8
   2  -5 -18 5186.70 298.115   7
   2  -5 -17 1349.90 164.187   8
   2  -5 -16 47007.5 911.956   8
  -2  -5  16 49438.3 1399.91   3
  -2  -5  15 704.345 164.979   3
  -2  -5  14 1848.77 261.314   3
  -2  -5  13 537.826 141.203   3
  -2  -5  12 54885.1 1331.25   3
   2  -5 -11 266.991 47.8340   1
  -2  -5  11 370.050 127.216   3
  -2  -5  10 5507.64 389.078   3
   2  -5 -10 5139.39 325.061   1
  -2  -5   9 394.055 113.678   3
   2  -5  -9 378.224 101.831   1
   2  -5  -8 21054.2 642.980   1
  -2  -5   8 22019.2 697.879   3
   2  -5  -7 215.785 61.5252   1
  -2  -5   7 130.495 43.5587   3
   2  -5  -6 26709.3 736.279   1
  -2  -5   6 27969.1 692.021   3
  -2  -5   5 56.4587 50.9177   3
   2  -5  -5 172.047 76.4458   1
   2  -5  -4 21771.9 677.480   1
   2  -5  -3 48.8356 41.6697   1
  -2  -5   2 12991.6 592.263   1
   2  -5  -2 13235.2 523.291   1
  -2  -5   1 143.783 88.7870   1
   2  -5  -1 140.292 90.0661   1
  -2  -5   0 7229.15 442.676   1
   2  -5   0 7241.45 397.959   1
   2  -5   1 734.161 105.699   3
  -2  -5  -1 720.285 136.544   1
   2  -5   2 13874.1 477.151   3
  -2  -5  -2 13448.5 621.951   1
   2  -5   3 70.4861 36.9235   3
  -2  -5  -3 131.096 85.5845   1
  -2  -5  -4 23446.2 847.837   1
   2  -5   4 22693.9 683.566   3
  -2  -5  -5 1608.81 231.061   1
   2  -5   5 1656.38 202.255   3
   2  -5   6 2414.53 250.856   3
  -2  -5  -6 2959.11 309.449   1
   2  -5   7 2627.91 271.172   3
  -2  -5  -7 2530.07 278.201   1
  -2  -5  -8 7917.79 503.280   1
   2  -5   8 7828.45 487.047   3
  -2  -5  -9 1389.06 232.658   1
   2  -5   9 1219.02 208.873   3
   2  -5  10 8023.14 532.971   3
  -2  -5 -10 8415.49 533.282   1
   2  -5  11 1446.42 232.354   3
  -2  -5 -11 2023.29 272.123   1
   2  -5  12 7448.59 549.625   3
  -2  -5 -12 7689.10 511.223   1
   2  -5  13 1025.20 208.854   3
  -2  -5 -13 1382.16 147.548   8
  -2  -5 -13 1534.79 235.636   1
   2  -5  14 7528.91 576.199   3
  -2  -5 -14 7444.43 359.202   8
  -2  -5 -14 7390.10 510.293   1
  -2  -5 -15 444.997 100.306   8
  -2  -5 -16 2998.67 241.160   8
  -2  -5 -17 1283.97 165.043   8
  -2  -5 -18 1010.28 152.858   8
  -2  -5 -19 570.264 109.823   8
  -2  -5 -20 1811.66 183.400   8
  -2  -5 -21 57.1400 58.7420   8
  -2  -5 -22 722.556 105.769   8
  -2  -5 -23 2047.99 159.420   8
  -2  -5 -24 1760.50 130.480   8
   2  -4 -27 91.8101 40.8971   8
   2  -4 -27 165.391 43.5061   7
   2  -4 -26 694.870 97.9824   8
   2  -4 -26 386.367 71.3003   7
   2  -4 -25 92.0493 52.1337   8
   2  -4 -25 95.1732 42.2287   7
   2  -4 -24 3869.83 246.561   7
   2  -4 -24 4502.44 278.508   8
   2  -4 -23 71.4107 45.7571   7
   2  -4 -23 125.735 70.1885   8
   2  -4 -22 4778.79 319.279   8
   2  -4 -22 4311.95 285.338   7
   2  -4 -21 832.547 131.040   7
   2  -4 -21 786.073 136.610   8
   2  -4 -20 1631.83 193.353   8
   2  -4 -20 1515.03 176.408   7
   2  -4 -19 478.253 117.669   8
   2  -4 -19 337.823 91.7813   7
   2  -4 -18 15075.3 552.082   8
   2  -4 -18 15954.7 546.699   7
  -2  -4  17 328.490 121.645   3
   2  -4 -17 17.3559 55.6993   7
   2  -4 -16 623.549 101.826   7
  -2  -4  16 644.596 149.281   3
  -2  -4  15 1827.33 276.070   3
   2  -4 -15 1652.73 201.799   1
   2  -4 -14 57766.9 1139.03   1
  -2  -4  14 59059.4 1456.78   3
   2  -4 -13 383.899 92.0762   1
  -2  -4  13 373.793 106.931   3
   2  -4 -12 6866.03 367.491   1
  -2  -4  12 7365.29 481.315   3
   2  -4 -11 342.998 85.9298   1
  -2  -4  11 160.593 67.4844   3
  -2  -4  10 8056.41 455.695   3
   2  -4 -10 8124.13 373.995   1
   2  -4  -9 573.266 97.8585   1
  -2  -4   9 845.297 147.302   3
  -2  -4   8 33495.2 837.154   3
   2  -4  -8 32699.0 724.487   1
   2  -4  -7 99.4155 46.2868   1
  -2  -4   7 83.3043 72.2858   3
  -2  -4   6 20823.1 583.729   3
   2  -4  -6 19836.9 561.354   1
   2  -4  -5 100.662 54.0980   1
  -2  -4   5 31.0709 33.5962   3
  -2  -4   4 119680. 1178.52   3
   2  -4  -4 114743. 1353.42   1
  -2  -4   3 1739.75 131.582   3
   2  -4  -3 1690.38 167.719   1
   2  -4  -2 34614.6 545.012   3
  -2  -4   2 34964.7 491.129   3
   2  -4  -2 33929.3 718.900   1
  -2  -4   1 259.239 32.4128   3
   2  -4  -1 314.443 60.3803   3
  -2  -4   1 327.582 94.8347   1
   2  -4  -1 265.376 62.6694   1
  -2  -4   0 63437.7 1141.08   1
   2  -4   0 61683.2 842.229   3
  -2  -4  -1 708.504 142.522   1
   2  -4   1 587.472 95.9817   3
  -2  -4  -2 1826.25 210.704   1
   2  -4   2 1500.93 153.296   3
   2  -4   3 2881.28 223.542   3
  -2  -4  -3 3106.68 273.844   1
   2  -4   4 20213.6 621.751   3
  -2  -4  -4 19903.7 705.402   1
  -2  -4  -5 1401.56 195.264   1
   2  -4   5 1077.71 159.091   3
   2  -4   6 93937.3 1473.62   3
  -2  -4  -6 94421.7 1572.39   1
  -2  -4  -7 9668.94 514.350   1
   2  -4   7 8592.67 469.326   3
  -2  -4  -8 16523.7 673.355   1
   2  -4   8 16233.2 672.374   3
   2  -4   9 183.587 97.6761   3
  -2  -4  -9 130.370 89.3741   1
   2  -4  10 346.152 111.502   3
  -2  -4 -10 587.825 145.315   1
   2  -4  11 692.261 158.305   3
  -2  -4 -11 342.481 110.917   1
   2  -4  12 10893.6 651.574   3
  -2  -4 -12 10812.5 580.522   1
  -2  -4 -13 2302.17 273.492   1
   2  -4  13 2021.18 296.867   3
  -2  -4 -14 27295.7 967.238   1
  -2  -4 -14 29340.7 715.495   8
   2  -4  14 28413.8 1110.76   3
   2  -4  15 4239.60 437.064   3
  -2  -4 -15 4263.99 388.029   1
  -2  -4 -15 4193.76 284.770   8
  -2  -4 -16 11170.1 476.242   8
   2  -4  16 11636.2 740.800   3
  -2  -4 -16 9622.13 599.076   1
  -2  -4 -17 745.450 131.859   8
  -2  -4 -18 7491.14 363.534   7
  -2  -4 -18 7888.34 414.057   8
  -2  -4 -19 920.167 148.963   8
  -2  -4 -19 765.033 121.654   7
  -2  -4 -20 1416.43 164.642   7
  -2  -4 -20 1299.39 170.442   8
  -2  -4 -21 532.720 98.2896   7
  -2  -4 -21 573.082 113.984   8
  -2  -4 -22 859.868 128.569   8
  -2  -4 -22 1005.28 120.383   7
  -2  -4 -23 71.0436 35.4731   7
  -2  -4 -23-18.4078 51.0237   8
  -2  -4 -24 2427.68 146.691   7
  -2  -4 -24 2890.46 198.207   8
  -2  -4 -25 1766.83 139.149   8
   2  -3 -28 4517.16 193.580   7
   2  -3 -28 4850.72 210.529   8
   2  -3 -27 352.680 71.8095   8
   2  -3 -27 390.428 73.4483   7
   2  -3 -26 5999.49 299.263   8
   2  -3 -26 5891.24 290.070   7
   2  -3 -25 273.512 87.0214   7
   2  -3 -25 248.436 82.4303   8
   2  -3 -24 1671.93 182.601   7
   2  -3 -24 1661.19 187.560   8
   2  -3 -23 566.917 114.738   8
   2  -3 -23 481.409 107.062   7
   2  -3 -22 2849.54 249.214   8
   2  -3 -22 2591.79 235.118   7
   2  -3 -21 145.611 76.2232   8
   2  -3 -21 353.950 99.2378   7
   2  -3 -20 7411.85 402.627   8
   2  -3 -20 7287.16 394.652   7
   2  -3 -19 345.270 90.1735   7
   2  -3 -19 483.722 107.936   8
  -2  -3  18 695.284 157.422   3
   2  -3 -18 1113.45 152.791   7
   2  -3 -17 2226.88 202.188   7
   2  -3 -17 2667.36 271.689   1
  -2  -3  17 2107.77 295.778   3
  -2  -3  16 18686.4 851.054   3
   2  -3 -16 17836.8 682.318   1
   2  -3 -15 357.601 99.8763   1
  -2  -3  15 380.246 124.521   3
   2  -3 -15 461.856 95.6595   2
  -2  -3  14 115.355 69.7961   3
   2  -3 -14 30.3138 55.5647   2
   2  -3 -14 126.860 54.9761   1
  -2  -3  13 550.778 137.015   3
   2  -3 -13 762.540 129.624   1
   2  -3 -12 19112.6 589.590   1
  -2  -3  12 19468.2 745.375   3
  -2  -3  11 5707.31 389.890   3
   2  -3 -11 6151.66 317.551   1
  -2  -3  10 35808.7 918.799   3
   2  -3 -10 34319.8 717.153   1
   2  -3  -9 626.481 96.3569   1
  -2  -3   9 744.345 128.429   3
   2  -3  -8 29168.5 612.766   1
  -2  -3   8 29161.9 737.678   3
   2  -3  -7 1401.56 134.129   1
  -2  -3   7 1425.59 155.107   3
   2  -3  -6 103082. 1088.37   1
  -2  -3   6 105476. 1243.76   3
   2  -3  -5 94.0947 35.4093   1
  -2  -3   5 86.8896 47.3597   3
  -2  -3   4 14218.9 387.490   3
   2  -3  -4 15068.4 411.430   1
   2  -3  -3 709.107 90.4520   1
  -2  -3   3 613.108 75.4704   3
  -2  -3   2 33073.7 461.852   3
   2  -3  -2 33132.5 580.794   1
  -2  -3   1 526.751 48.9671   3
  -2  -3   0 154892. 1546.67   1
   2  -3   1 325.986 67.4737   3
  -2  -3  -1 448.059 94.0075   1
   2  -3   2 5356.57 266.915   3
  -2  -3  -2 5420.86 309.463   1
   2  -3   3 1678.05 161.027   3
  -2  -3  -3 1945.18 197.061   1
   2  -3   4 19743.8 568.275   3
  -2  -3  -4 20214.5 630.136   1
  -2  -3  -5 4475.46 306.496   1
   2  -3   5 4252.34 284.498   3
  -2  -3  -6 5138.56 337.301   1
   2  -3   6 5151.26 327.778   3
  -2  -3  -7 1374.66 173.221   1
   2  -3   7 1345.10 175.131   3
   2  -3   8 27263.2 822.078   3
  -2  -3  -8 28146.8 802.486   1
   2  -3   9 4788.01 359.085   3
  -2  -3  -9 5423.20 364.962   1
  -2  -3 -10 27903.8 843.511   1
   2  -3  10 28357.0 917.935   3
  -2  -3 -11 3161.73 302.904   1
   2  -3  11 2831.60 306.711   3
  -2  -3 -12 2776.67 283.030   1
   2  -3  12 2943.50 327.611   3
   2  -3  13 2001.58 282.891   3
  -2  -3 -13 2316.17 280.302   1
   2  -3  14 46243.1 1382.60   3
  -2  -3 -14 44161.8 1199.71   1
   2  -3  15 7523.68 573.758   3
  -2  -3 -15 7171.12 500.769   1
   2  -3  16 12695.7 758.384   3
  -2  -3 -16 11562.0 653.434   1
  -2  -3 -16 11621.4 482.890   8
  -2  -3 -16 11564.3 452.477   7
  -2  -3 -17 2860.19 232.058   7
   2  -3  17 2931.65 378.361   3
  -2  -3 -17 3115.25 345.432   1
  -2  -3 -17 2848.99 251.374   8
  -2  -3 -17 3165.07 342.604   2
  -2  -3 -18 4213.92 307.694   8
  -2  -3 -18 3753.79 274.283   7
  -2  -3 -19 376.957 81.9226   7
  -2  -3 -19 309.875 99.3705   8
  -2  -3 -20 4178.88 311.208   8
  -2  -3 -20 3859.42 284.085   7
  -2  -3 -21 8.96602 55.9566   7
  -2  -3 -21 31.1892 62.8879   8
  -2  -3 -22 1478.40 181.606   8
  -2  -3 -22 1337.44 159.847   7
  -2  -3 -23 139.872 64.5577   7
  -2  -3 -23 40.0908 54.8395   8
  -2  -3 -24 529.537 97.6680   8
  -2  -3 -24 435.729 84.7349   7
  -2  -3 -25 38.1158 32.1492   7
  -2  -3 -25 157.975 60.6171   8
  -2  -3 -26 462.453 73.5870   8
  -2  -3 -26 471.140 61.7321   7
   2  -2 -28 383.479 69.2164   8
   2  -2 -28 352.249 68.3220   7
   2  -2 -27 302.926 75.0403   8
   2  -2 -27 377.039 80.2318   7
   2  -2 -26 2070.23 189.733   7
   2  -2 -26 2217.64 191.057   8
   2  -2 -25 103.890 67.9022   8
   2  -2 -25-5.81385 45.2122   7
   2  -2 -24 5869.80 347.861   7
   2  -2 -24 6500.22 362.566   8
   2  -2 -23 836.969 137.893   8
   2  -2 -23 777.201 140.558   7
   2  -2 -22 1510.31 187.679   8
   2  -2 -22 1743.38 205.019   7
   2  -2 -21 453.445 104.297   8
   2  -2 -21 289.763 94.0820   7
   2  -2 -20 569.245 122.346   8
   2  -2 -20 457.099 110.404   7
   2  -2 -19 718.763 139.457   7
   2  -2 -19 860.861 136.323   8
  -2  -2  19 831.595 197.014   3
   2  -2 -18 8797.94 501.184   2
  -2  -2  18 8647.17 598.755   3
   2  -2 -18 8552.55 407.997   7
  -2  -2  17 421.378 135.204   3
   2  -2 -17 867.307 155.240   2
   2  -2 -16 5898.97 396.966   1
  -2  -2  16 6044.08 474.158   3
   2  -2 -16 5661.20 371.543   2
   2  -2 -15 428.500 107.819   2
  -2  -2  15 664.535 159.204   3
   2  -2 -15 635.351 134.158   1
   2  -2 -14 9490.84 433.249   2
   2  -2 -14 10655.5 481.845   1
  -2  -2  14 10625.1 574.148   3
   2  -2 -13 1412.25 168.206   1
   2  -2 -13 1399.00 162.710   2
  -2  -2  13 1423.13 206.718   3
  -2  -2  12 20192.3 726.215   3
   2  -2 -12 20690.4 595.419   1
  -2  -2  11 130.515 58.1385   3
   2  -2 -11 176.896 72.2201   1
  -2  -2  10 80549.3 1297.54   3
   2  -2 -10 79534.3 1025.05   1
  -2  -2   9 853.914 138.273   3
   2  -2  -9 1141.20 119.712   1
   2  -2  -8 121266. 1109.02   1
  -2  -2   8 124497. 1445.08   3
  -2  -2   7 469.171 90.9301   3
   2  -2  -7 441.617 65.3991   1
  -2  -2   6 6860.88 298.533   3
   2  -2  -6 6778.45 232.573   1
  -2  -2   5 934.100 104.907   3
   2  -2  -5 972.493 86.2131   1
  -2  -2   4 37634.0 585.269   3
   2  -2  -4 37629.9 499.289   1
   2  -2  -3 747.720 71.1818   1
  -2  -2   3 772.891 79.9715   3
   2  -2  -2 182686. 1018.93   1
  -2  -2   2 183215. 1013.84   3
  -2  -2   1 3728.86 124.626   3
  -2  -2   0 10429.5 338.378   1
  -2  -2  -1 13612.8 394.601   1
  -2  -2  -2 411755. 2284.30   1
  -2  -2  -2 386958. 895.847   4
  -2  -2  -3 832.658 114.459   1
   2  -2   3 645.081 95.6068   3
  -2  -2  -4 133177. 1414.14   1
   2  -2   4 137486. 1388.13   3
  -2  -2  -5 2343.74 200.291   1
   2  -2   5 1602.09 163.450   3
   2  -2   6 113153. 1422.42   3
  -2  -2  -6 113622. 1384.18   1
   2  -2   7 751.259 131.875   3
  -2  -2  -7 1130.47 153.285   1
   2  -2   8 5051.59 330.518   3
  -2  -2  -8 5541.50 328.383   1
  -2  -2  -9 3964.26 289.415   1
   2  -2   9 3229.32 279.726   3
  -2  -2 -10 1554.58 191.232   1
   2  -2  10 1697.71 213.834   3
   2  -2  11 3504.27 320.637   3
  -2  -2 -11 3952.89 313.956   1
   2  -2  12 56674.1 1347.63   3
  -2  -2 -12 55549.8 1217.68   1
   2  -2  13 6399.84 476.447   3
  -2  -2 -13 6898.74 448.505   1
  -2  -2 -14 7243.53 483.712   1
   2  -2  14 7341.44 524.072   3
  -2  -2 -15 4273.30 385.906   1
   2  -2  15 4215.24 414.915   3
  -2  -2 -15 4080.38 370.964   2
   2  -2  16 18803.6 895.894   3
  -2  -2 -16 18366.5 825.209   1
  -2  -2 -16 18254.6 809.709   2
  -2  -2 -16 19680.5 610.438   8
   2  -2  17 1157.16 222.799   3
  -2  -2 -17 908.348 139.256   8
  -2  -2 -17 946.434 143.288   7
  -2  -2 -17 1247.95 216.293   2
  -2  -2 -17 1164.97 212.633   1
  -2  -2 -18 5264.59 339.115   8
  -2  -2 -18 5126.73 330.394   7
  -2  -2 -18 5664.06 464.508   2
  -2  -2 -19 3299.57 277.132   8
  -2  -2 -19 2959.06 260.509   7
  -2  -2 -20 1623.34 193.932   7
  -2  -2 -20 1740.58 207.754   8
  -2  -2 -21 237.937 84.1302   7
  -2  -2 -21 237.899 90.9154   8
  -2  -2 -22 5375.90 339.381   8
  -2  -2 -22 5118.78 330.775   7
  -2  -2 -23 242.840 88.0310   7
  -2  -2 -23 107.300 69.6623   8
  -2  -2 -24 690.390 114.394   8
  -2  -2 -24 650.145 109.701   7
  -2  -2 -25 514.184 90.4630   7
  -2  -2 -25 492.815 93.7319   8
  -2  -2 -26 143.046 51.0373   8
  -2  -2 -26 162.817 46.9996   7
  -2  -2 -27 231.428 49.4302   7
  -2  -2 -27 200.749 48.1069   8
   2  -1 -29 365.439 53.0092   8
   2  -1 -29 417.541 68.0959   7
   2  -1 -28 1059.15 107.116   8
   2  -1 -28 1042.50 118.872   7
   2  -1 -27 660.252 100.819   8
   2  -1 -27 715.250 109.990   7
   2  -1 -26 1188.84 139.920   8
   2  -1 -26 1349.70 164.388   7
   2  -1 -25 313.713 85.0406   8
   2  -1 -25 247.194 78.6828   7
   2  -1 -24 559.604 110.940   8
   2  -1 -24 645.738 120.904   7
   2  -1 -23 33.0904 57.8481   8
   2  -1 -23 35.3606 61.3591   7
   2  -1 -22 2318.19 232.602   7
   2  -1 -22 1958.31 207.752   8
   2  -1 -21 306.218 94.3130   8
   2  -1 -21 390.385 110.949   7
  -2  -1  20 10979.1 669.549   3
   2  -1 -20 11254.7 495.508   7
   2  -1 -20 10706.0 472.108   8
   2  -1 -19 1355.81 168.008   8
  -2  -1  19 1663.91 268.046   3
   2  -1 -19 1405.19 209.624   2
   2  -1 -19 1423.04 173.006   7
   2  -1 -18 77.5073 51.2241   2
  -2  -1  18 431.086 164.004   3
   2  -1 -17 1819.50 231.898   2
  -2  -1  17 1475.39 237.419   3
  -2  -1  16 64511.9 1495.36   3
   2  -1 -16 64116.3 1283.48   2
   2  -1 -15 203.850 71.6574   2
  -2  -1  15 193.465 116.987   3
  -2  -1  14 2107.66 256.648   3
   2  -1 -14 1812.81 195.937   2
   2  -1 -14 2201.05 228.263   1
   2  -1 -13 3107.36 240.747   2
  -2  -1  13 2782.94 272.657   3
   2  -1 -13 3537.63 268.340   1
  -2  -1  12 75382.4 1334.11   3
   2  -1 -12 73258.9 1096.16   2
   2  -1 -12 74494.1 1119.68   1
   2  -1 -11 794.242 114.728   1
   2  -1 -11 787.207 112.014   2
  -2  -1  11 836.698 134.833   3
   2  -1 -10 85222.0 1012.01   2
   2  -1 -10 83813.6 1032.88   1
   2  -1  -9 470.279 76.0290   1
  -2  -1   9 421.027 95.7601   3
   2  -1  -9 333.624 69.2350   2
  -2  -1   8 30431.4 683.503   3
   2  -1  -8 30564.1 527.588   1
  -2  -1   7 360.129 79.9673   3
   2  -1  -7 409.366 59.2619   1
   2  -1  -6 30688.3 430.800   1
  -2  -1   6 29366.3 572.723   3
  -2  -1   5 7036.24 258.281   3
   2  -1  -5 7823.44 191.350   1
   2  -1  -4 275559. 962.604   1
  -2  -1   4 269590. 1460.35   3
   2  -1  -3 309.318 28.0691   1
  -2  -1   3 190.946 39.1711   3
  -2  -1   2 17171.2 286.453   3
   2  -1  -2 17930.3 164.910   1
  -2  -1   1 1663.03 80.6642   3
  -2  -1   0 258110. 1296.90   1
  -2  -1   0 256689. 892.685   4
  -2  -1  -1 1444.84 107.921   1
  -2  -1  -1 1604.51 70.8790   4
  -2  -1  -2 109471. 1001.20   1
  -2  -1  -2 109257. 558.854   4
  -2  -1  -3 22370.4 264.888   4
  -2  -1  -3 23672.8 494.100   1
  -2  -1  -4 313129. 1873.13   1
   2  -1   4 306521. 1877.57   3
  -2  -1  -5 2431.39 174.363   1
  -2  -1  -5 2223.38 106.366   4
   2  -1   5 2171.66 172.888   3
  -2  -1  -6 131616. 1344.53   1
   2  -1   6 133449. 1429.06   3
  -2  -1  -7 2470.28 196.557   1
   2  -1   7 2081.87 192.666   3
   2  -1   8 13591.0 515.085   3
  -2  -1  -8 13071.4 473.483   1
   2  -1   9 4343.14 309.840   3
  -2  -1  -9 4720.28 294.013   1
  -2  -1 -10 30804.7 802.432   1
   2  -1  10 32424.9 882.042   3
   2  -1  11 6994.69 434.999   3
  -2  -1 -11 8031.56 431.836   1
  -2  -1 -12 10119.7 508.963   1
   2  -1  12 10373.2 547.069   3
  -2  -1 -13 2750.49 284.782   1
  -2  -1 -13 2754.45 284.461   2
   2  -1  13 2601.00 292.729   3
  -2  -1 -14 49058.3 1240.25   1
  -2  -1 -14 51561.3 1263.61   2
   2  -1  14 51393.8 1335.13   3
  -2  -1 -15 10988.0 620.151   1
   2  -1  15 9884.28 610.002   3
  -2  -1 -15 10558.1 600.767   2
  -2  -1 -16 32423.8 1096.87   1
   2  -1  16 33414.5 1147.04   3
  -2  -1 -16 32687.5 1092.71   2
   2  -1  17 1371.57 227.788   3
  -2  -1 -17 1642.08 188.458   8
  -2  -1 -17 1553.54 182.454   7
  -2  -1 -17 1600.01 264.956   2
  -2  -1 -18 12526.3 514.706   8
   2  -1  18 11545.9 702.253   3
  -2  -1 -18 10950.0 682.915   2
  -2  -1 -18 12572.7 521.577   7
  -2  -1 -19 938.272 151.625   8
  -2  -1 -19 1008.99 155.636   7
  -2  -1 -20 11694.2 513.242   8
  -2  -1 -20 12880.1 548.952   7
  -2  -1 -21 1733.79 205.237   7
  -2  -1 -21 1766.98 200.708   8
  -2  -1 -22 598.701 120.783   7
  -2  -1 -22 596.819 123.120   8
  -2  -1 -23 212.454 82.1928   8
  -2  -1 -23 321.271 94.0300   7
  -2  -1 -24 619.492 118.106   7
  -2  -1 -24 648.360 110.540   8
  -2  -1 -25 1259.76 149.448   7
  -2  -1 -25 1273.99 141.240   8
  -2  -1 -26 3261.17 211.107   7
  -2  -1 -26 3166.31 193.551   8
  -2  -1 -27 1140.76 98.7086   8
  -2  -1 -27 1436.33 119.182   7
   2   0 -29 798.605 90.9840   7
   2   0 -28 1532.24 117.251   8
   2   0 -28 1687.72 145.588   7
   2   0 -27 409.294 87.8928   7
   2   0 -27 650.451 92.0122   8
   2   0 -26 171.816 76.6899   7
   2   0 -26 156.216 59.9004   8
   2   0 -25 343.710 84.9507   8
   2   0 -25 319.594 98.6167   7
   2   0 -24 4504.86 314.954   7
   2   0 -24 4198.27 281.577   8
   2   0 -23 537.431 125.846   7
   2   0 -23 600.805 115.115   8
   2   0 -22 2806.79 239.475   8
   2   0 -22 3096.67 270.104   7
   2   0 -21 154.571 74.0715   8
   2   0 -21 190.084 79.6335   7
   2   0 -20 12368.2 673.353   2
   2   0 -20 14008.1 522.944   8
  -2   0  20 13371.7 710.468   3
   2   0 -20 14148.6 555.453   7
   2   0 -19 1258.73 159.982   8
  -2   0  19 1424.39 228.726   3
   2   0 -19 1734.00 249.004   2
   2   0 -19 1232.09 166.230   7
   2   0 -18 18181.1 784.006   2
  -2   0  18 18266.5 802.839   3
   2   0 -17 6187.42 432.920   2
  -2   0  17 6006.90 449.620   3
  -2   0  16 4872.14 390.638   3
   2   0 -16 4633.64 363.153   2
  -2   0  15 7296.03 461.541   3
   2   0 -15 7938.65 447.253   2
   2   0 -14 100063. 1501.64   2
  -2   0  14 99676.2 1616.10   3
   2   0 -13 40.3605 40.6650   2
  -2   0  13 138.511 74.5414   3
  -2   0  12 59378.4 1140.81   3
   2   0 -12 58407.6 1019.59   2
   2   0 -11 6594.83 323.312   2
  -2   0  11 6154.58 342.865   3
   2   0 -10 216613. 1707.88   2
  -2   0  10 218145. 1915.76   3
   2   0  -9 1666.44 143.342   2
  -2   0   9 1540.62 160.254   3
   2   0  -8 13888.1 368.027   2
  -2   0   8 13910.9 430.119   3
  -2   0   7 2288.44 166.010   3
   2   0  -7 2466.21 145.486   2
  -2   0   6 43390.9 649.705   3
   2   0  -6 42020.2 532.838   2
  -2   0   5 5.96609 24.1339   3
   2   0  -5 6.58869 16.4283   2
  -2   0   4 19405.0 357.853   3
   2   0  -4 20001.9 285.877   2
   2   0  -3 2588.57 90.0901   2
  -2   0   3 2475.34 116.559   3
  -2   0   2 90530.1 638.520   3
   2   0  -2 90843.1 457.917   2
  -2   0   1 26.0818 20.2245   4
  -2   0   1 20.2386 12.8595   1
  -2   0   0 216335. 861.130   1
  -2   0   0 220326. 977.765   4
  -2   0  -1 2889.91 115.729   1
  -2   0  -1 2786.91 113.055   4
  -2   0  -2 63253.6 602.822   1
  -2   0  -2 63160.7 560.065   4
  -2   0  -3 56.7411 31.4456   1
  -2   0  -3 69.2199 34.1381   4
   2   0   4 24513.1 485.595   3
  -2   0  -4 25398.8 461.053   1
  -2   0  -4 25385.1 417.555   4
  -2   0  -5 638.323 85.2877   1
  -2   0  -5 573.530 72.6072   4
   2   0   5 635.620 88.3226   3
  -2   0  -6 59493.8 840.908   1
  -2   0  -6 60821.1 754.095   4
   2   0   6 59453.8 877.515   3
  -2   0  -7 14602.0 396.840   4
   2   0   7 14386.2 467.969   3
  -2   0  -8 1989.88 178.078   1
   2   0   8 1691.74 169.794   3
  -2   0  -9 348.072 92.7431   1
   2   0   9 226.096 72.0924   3
  -2   0 -10 3089.34 254.088   2
   2   0  10 2296.78 223.778   3
  -2   0 -10 2666.84 240.731   1
  -2   0 -11 29.5426 71.1796   1
  -2   0 -11 92.5787 74.5846   2
   2   0  11 40.8056 72.5418   3
   2   0  12 2028.28 234.255   3
  -2   0 -12 2141.68 239.925   2
  -2   0 -12 1659.81 217.793   1
  -2   0 -13 12305.4 603.162   1
  -2   0 -13 12952.1 611.665   2
   2   0  14 12370.3 623.141   3
  -2   0 -14 12973.1 642.094   2
  -2   0 -14 12756.0 638.977   1
   2   0  15 1650.60 247.241   3
  -2   0 -15 1647.77 237.288   2
  -2   0 -16 9676.95 612.305   2
   2   0  16 9570.68 588.167   3
  -2   0 -17 1753.48 266.917   2
  -2   0 -17 1371.71 165.823   8
   2   0  17 1787.03 275.474   3
  -2   0 -17 1466.39 180.448   7
  -2   0 -18 22986.0 708.002   7
  -2   0 -18 22628.8 672.648   8
  -2   0 -18 22227.5 984.494   2
   2   0  18 21359.3 899.205   3
  -2   0 -19 1061.01 152.567   8
  -2   0 -19 975.574 159.487   7
  -2   0 -20 443.876 105.517   8
  -2   0 -20 497.509 120.967   7
  -2   0 -21 4.14640 70.5517   7
  -2   0 -21 22.5216 62.3550   8
  -2   0 -22 1730.57 190.829   8
  -2   0 -22 1701.08 205.077   7
  -2   0 -23 378.112 87.9635   8
  -2   0 -23 334.792 105.492   7
  -2   0 -24 11.9556 62.5446   7
  -2   0 -24 16.8158 47.0889   8
  -2   0 -25 730.092 118.754   7
  -2   0 -25 762.411 106.533   8
  -2   0 -26 1322.89 139.874   7
  -2   0 -26 1255.64 117.488   8
  -2   0 -27 22.5089 22.8063   8
  -2   0 -27 14.5668 31.4307   7
   2   1 -29 452.288 65.7448   7
   2   1 -28 1120.80 118.445   7
   2   1 -27 756.794 109.729   7
   2   1 -26 1209.08 125.159   8
   2   1 -26 1282.68 151.851   7
   2   1 -25 317.270 89.3416   7
   2   1 -25 225.049 65.8222   8
   2   1 -24 474.087 108.679   7
   2   1 -24 411.937 85.4397   8
   2   1 -23 28.7044 54.0533   7
   2   1 -23 41.0031 47.7142   8
   2   1 -22 2396.97 235.406   7
   2   1 -22 2584.78 217.141   8
   2   1 -21 362.572 93.8692   8
   2   1 -21 250.810 80.3957   7
   2   1 -20 9707.43 415.941   8
  -2   1  20 10143.0 428.534   6
   2   1 -20 10067.3 464.208   7
   2   1 -20 9155.60 600.626   2
   2   1 -19 1224.97 203.676   2
   2   1 -19 1298.10 149.022   8
  -2   1  19 1240.58 145.871   6
  -2   1  19 1110.52 191.780   3
   2   1 -19 1316.41 167.343   7
  -2   1  18 115.936 80.3594   3
   2   1 -18 419.669 105.047   2
  -2   1  17 1429.72 207.880   3
   2   1 -17 1010.44 183.324   2
   2   1 -16 60937.5 1380.29   2
  -2   1  16 63695.1 1330.25   3
   2   1 -15 307.043 91.5520   2
  -2   1  15 52.5892 47.1572   3
  -2   1  14 2040.82 223.500   3
   2   1 -14 1992.25 230.506   2
   2   1 -13 2837.34 260.019   2
  -2   1  13 3253.25 269.930   3
   2   1 -12 74272.8 1226.55   2
  -2   1  12 74744.7 1195.81   3
   2   1 -11 831.720 131.127   2
  -2   1  11 754.424 124.706   3
   2   1 -10 86963.9 1173.68   2
  -2   1  10 86462.8 1158.25   3
   2   1  -9 343.162 78.9302   2
  -2   1   9 345.709 79.0476   3
   2   1  -8 33091.7 644.283   2
  -2   1   8 34150.1 635.377   3
  -2   1   7 450.315 74.1742   3
   2   1  -7 475.069 76.9271   2
   2   1  -6 27801.2 514.157   2
  -2   1   6 27345.2 482.142   3
  -2   1   5 6754.42 220.776   3
  -2   1   5 7316.43 208.392   4
   2   1  -5 7087.38 244.997   2
  -2   1   4 270416. 1215.95   4
  -2   1   4 268814. 1265.03   3
   2   1  -3 156.552 36.4484   2
  -2   1   3 197.493 37.3519   4
  -2   1   2 21527.8 348.921   4
   2   1  -2 18225.2 332.280   2
   2   1  -1 1576.55 100.123   2
  -2   1   1 1531.54 51.2256   2
  -2   1   1 1611.90 97.0001   4
  -2   1   0 255712. 844.751   2
   2   1   0 255551. 1262.05   2
  -2   1  -1 1445.10 100.193   4
  -2   1  -1 1625.92 83.6087   2
  -2   1  -2 109316. 774.294   2
  -2   1  -2 108969. 906.474   4
  -2   1  -2 108202. 740.932   1
  -2   1  -3 23990.2 411.606   2
  -2   1  -3 25155.8 409.676   1
   2   1   4 310568. 1512.42   3
  -2   1  -4 310261. 1753.94   4
  -2   1  -5 2126.49 159.903   4
   2   1   5 2015.46 135.374   3
  -2   1  -5 2450.76 158.908   1
  -2   1  -5 2223.35 156.561   2
  -2   1  -6 129096. 1261.62   2
  -2   1  -6 131877. 1264.45   1
  -2   1  -6 128025. 1278.44   4
   2   1   6 127942. 1170.25   3
  -2   1  -7 2424.67 188.542   1
   2   1   7 2004.40 159.993   3
  -2   1  -7 2340.32 187.799   2
  -2   1  -7 2223.92 179.186   4
   2   1   8 14786.0 461.005   3
  -2   1  -8 15084.5 496.872   1
  -2   1  -8 15181.8 501.878   2
  -2   1  -9 3862.57 267.656   1
   2   1   9 4099.94 260.650   3
  -2   1  -9 4597.82 292.550   2
  -2   1 -10 32754.8 839.124   2
   2   1  10 32528.2 777.562   3
  -2   1 -11 8954.49 466.675   2
   2   1  11 7196.49 385.078   3
  -2   1 -12 10373.6 534.715   2
   2   1  12 10556.7 493.504   3
   2   1  13 2731.62 265.562   3
  -2   1 -13 2555.40 282.928   2
  -2   1 -14 52037.5 1328.72   2
   2   1  14 51878.9 1190.98   3
   2   1  15 9526.85 526.933   3
  -2   1 -15 10376.4 623.901   2
  -2   1 -16 33441.6 1163.46   2
   2   1  16 32361.5 1005.01   3
  -2   1 -17 1768.09 280.723   2
  -2   1 -17 1906.39 205.080   7
  -2   1 -17 1569.19 170.336   8
  -2   1 -18 12346.4 528.017   7
  -2   1 -18 11782.3 475.132   8
  -2   1 -18 12546.7 755.139   2
  -2   1 -19 883.610 139.259   8
  -2   1 -19 999.517 156.406   7
  -2   1 -20 12153.7 542.083   7
  -2   1 -20 12063.2 486.681   8
  -2   1 -21 1617.69 199.129   7
  -2   1 -21 1717.26 186.702   8
  -2   1 -22 656.725 136.100   7
  -2   1 -22 453.433 105.217   8
  -2   1 -23 220.989 82.0962   8
  -2   1 -23 169.006 75.8616   7
  -2   1 -24 747.372 127.378   7
  -2   1 -24 644.860 99.2515   8
  -2   1 -25 1285.23 150.789   7
  -2   1 -25 1026.25 111.118   8
  -2   1 -26 3240.26 209.392   7
  -2   1 -27 1219.57 112.354   7
   2   2 -28 488.331 72.1535   7
   2   2 -27 331.400 73.8472   7
   2   2 -26 1804.85 166.120   7
   2   2 -25 21.8203 56.9074   7
   2   2 -24 5335.49 323.967   7
   2   2 -23 734.198 128.689   7
   2   2 -22 1518.16 187.887   7
   2   2 -21 316.321 94.6323   7
  -2   2  21 451.362 96.6860   6
   2   2 -20 786.704 132.756   7
  -2   2  20 910.110 148.277   6
  -2   2  20 745.547 122.339  10
   2   2 -19 978.709 142.845   7
  -2   2  19 955.633 128.194  10
  -2   2  19 725.978 130.431   6
   2   2 -19 627.977 158.496   2
   2   2 -18 7975.31 555.426   2
   2   2 -18 7951.03 380.633   7
  -2   2  18 8854.27 403.448   6
   2   2 -17-33.8811 43.1762   2
   2   2 -16 5457.83 434.183   2
   2   2 -15 368.294 111.500   2
  -2   2  15 511.948 118.295   3
  -2   2  14 10676.6 466.559   3
   2   2 -14 10446.6 542.868   2
  -2   2  13 1316.85 160.357   3
   2   2 -13 1612.35 208.574   2
  -2   2  12 18801.9 568.000   3
   2   2 -12 18659.3 661.773   2
   2   2 -11 235.789 84.6161   2
  -2   2  11 180.662 61.6435   3
  -2   2  11 230.722 52.0893   4
  -2   2  10 79659.7 1030.41   3
   2   2 -10 77913.2 1222.59   2
  -2   2  10 79680.7 872.770   4
   2   2  -9 861.123 131.186   2
  -2   2   9 903.236 103.716   3
  -2   2   9 1008.09 94.8016   4
  -2   2   8 122956. 1122.44   3
  -2   2   8 125175. 1023.59   4
  -2   2   7 547.889 73.2374   3
  -2   2   7 419.935 62.7344   4
   2   2  -7 446.189 88.9484   2
  -2   2   6 5706.68 213.060   4
  -2   2   6 5467.77 203.900   3
   2   2  -6 5433.87 275.601   2
  -2   2   5 976.570 85.9230   4
   2   2  -5 944.811 112.581   2
   2   2  -4 38097.4 661.259   2
  -2   2   4 36580.6 496.434   4
  -2   2   3 803.309 74.9873   4
   2   2  -3 796.649 94.3753   2
  -2   2   2 183702. 1150.35   4
  -2   2   2 182425. 965.466   2
   2   2  -2 184318. 1380.59   2
   2   2  -1 3768.02 196.782   2
  -2   2   1 3533.85 137.652   2
  -2   2   1 4085.39 179.859   4
  -2   2   0 11665.1 318.201   4
   2   2   0 10722.0 334.402   2
  -2   2   0 11509.6 264.161   2
  -2   2  -1 13013.3 303.827   2
  -2   2  -1 12587.7 347.052   4
  -2   2  -2 414447. 1847.24   2
  -2   2  -2 407245. 2069.01   4
  -2   2  -3 659.419 96.2202   4
   2   2   3 699.383 48.9853   3
  -2   2  -3 699.133 86.1101   2
  -2   2  -4 135774. 1335.80   4
   2   2   4 134275. 780.273   3
  -2   2  -5 1677.57 160.280   4
   2   2   5 1780.49 105.170   3
  -2   2  -5 1957.61 161.075   2
  -2   2  -6 119897. 1379.66   4
   2   2   6 117320. 948.513   3
  -2   2  -6 116619. 1310.49   2
  -2   2  -7 804.260 124.162   2
   2   2   7 902.194 95.0124   3
  -2   2  -7 833.751 125.811   4
  -2   2  -8 5547.63 324.312   2
   2   2   8 4866.63 232.287   3
   2   2   9 2779.79 190.958   3
  -2   2  -9 2915.32 251.479   2
   2   2  10 2551.85 194.989   3
  -2   2 -10 2502.11 250.107   2
   2   2  11 3344.87 236.427   3
  -2   2 -11 4080.80 339.331   2
  -2   2 -12 54101.9 1283.17   2
  -2   2 -13 6650.62 477.727   2
  -2   2 -14 7273.34 524.985   2
  -2   2 -15 4182.95 414.166   2
  -2   2 -16 18773.3 608.439   7
  -2   2 -16 17662.7 881.005   2
  -2   2 -17 474.093 147.244   2
  -2   2 -17 802.366 138.930   7
  -2   2 -18 5424.02 350.356   7
  -2   2 -19 2962.95 266.999   7
  -2   2 -20 1454.48 196.159   7
  -2   2 -21 184.426 81.7670   7
  -2   2 -22 4744.86 324.554   7
  -2   2 -23 206.759 73.2705   7
  -2   2 -24 761.657 121.662   7
  -2   2 -25 541.477 100.959   7
  -2   2 -26 188.063 60.2091   7
  -2   2 -27 215.028 46.9090   7
   2   3 -27 282.531 54.0411   7
   2   3 -26 5275.31 253.335   7
   2   3 -25 288.913 74.5546   7
   2   3 -24 1332.32 154.220   7
   2   3 -23 345.449 86.9552   7
   2   3 -22 2681.75 234.794   7
   2   3 -21 263.860 86.1687   7
  -2   3  20 6973.09 392.382   6
   2   3 -20 6236.63 350.678   7
   2   3 -19 294.726 91.4910   7
  -2   3  19 338.857 95.6478   6
  -2   3  18 1322.98 173.015   6
   2   3 -18 1385.67 259.795   2
  -2   3  18 1188.59 147.964  10
   2   3 -18 1036.04 140.413   7
  -2   3  17 2661.61 225.205   6
   2   3 -17 2318.57 304.028   2
   2   3 -16 18670.5 846.380   2
   2   3 -15 97.2196 67.0868   2
   2   3 -14 227.659 86.6216   2
   2   3 -13 935.137 173.563   2
   2   3 -12 18046.0 708.723   2
   2   3 -11 5915.44 388.250   2
  -2   3  10 34420.0 624.816   3
   2   3 -10 34803.0 906.269   2
   2   3  -9 786.139 144.166   2
  -2   3   8 27547.8 418.947   4
   2   3  -8 27578.9 746.261   2
  -2   3   7 1588.19 102.942   4
   2   3  -7 1439.31 172.064   2
   2   3  -6 105202. 1364.98   2
  -2   3   6 102200. 845.322   4
   2   3  -5 90.3547 62.1480   2
  -2   3   5 106.391 31.7452   4
  -2   3   4 15815.3 357.571   4
   2   3  -4 15950.9 504.192   2
   2   3  -3 776.032 118.636   2
  -2   3   3 628.650 78.9683   4
  -2   3   2 33619.3 560.978   2
  -2   3   2 33892.3 565.358   4
  -2   3   1 434.844 67.1106   2
  -2   3   1 402.707 66.5001   4
   2   3  -1 467.147 89.4198   2
   2   3   0 153529. 1502.89   2
  -2   3   0 154946. 1253.73   2
  -2   3   0 150240. 1303.99   4
   2   3   1 344.939 77.2910   2
  -2   3  -1 267.071 62.6915   4
  -2   3  -1 257.731 55.6269   2
  -2   3  -2 5734.51 265.821   2
  -2   3  -2 5819.60 288.886   4
  -2   3  -3 1643.21 160.571   4
  -2   3  -3 1633.37 153.095   2
  -2   3  -4 22477.9 610.928   4
  -2   3  -4 22629.4 586.113   2
  -2   3  -5 4562.33 277.623   2
  -2   3  -5 4598.03 287.009   4
  -2   3  -6 3700.61 263.518   2
  -2   3  -6 4298.49 290.358   4
  -2   3  -7 1038.15 149.612   4
  -2   3  -7 1225.25 166.133   2
  -2   3  -8 28108.0 794.603   2
  -2   3  -9 5144.28 363.640   2
  -2   3 -10 28411.2 893.887   2
  -2   3 -11 3185.33 319.888   2
  -2   3 -12 3130.50 331.289   2
  -2   3 -13 2274.76 296.017   2
  -2   3 -14 44556.8 1340.18   2
  -2   3 -15 6685.26 538.280   2
  -2   3 -16 11753.6 487.485   7
  -2   3 -16 11297.9 730.996   2
  -2   3 -17 2716.17 366.958   2
  -2   3 -17 2790.30 247.364   7
  -2   3 -18 4185.43 310.014   7
  -2   3 -19 260.429 85.1093   7
  -2   3 -20 4173.21 309.023   7
  -2   3 -21 99.5776 64.3074   7
  -2   3 -22 1370.04 170.196   7
  -2   3 -23 153.816 64.4795   7
  -2   3 -24 420.020 80.1120   7
   2   3  25 8.51015 36.0419   5
  -2   3 -25 145.960 49.0755   7
  -2   3 -26 444.314 65.2617   7
  -2   4  20 2049.45 221.408   6
  -2   4  19 205.113 77.8887   6
  -2   4  18 15030.9 576.814   6
  -2   4  17 102.753 67.3387   6
   2   4 -17-248.480 107.751   2
   2   4 -16 634.262 158.251   2
  -2   4  16 731.278 123.606   6
   2   4 -15 1194.47 218.766   2
   2   4 -14 54407.1 1431.40   2
   2   4 -13 344.075 123.266   2
   2   4 -12 7486.51 499.844   2
   2   4 -11 299.903 111.823   2
   2   4 -10 5990.75 418.327   2
   2   4  -9 671.684 140.565   2
   2   4  -8 31363.3 893.127   2
   2   4  -7 65.4615 57.2738   2
   2   4  -6 22901.7 724.932   2
  -2   4   5 61.2124 30.8035   4
   2   4  -5 101.902 71.4159   2
  -2   4   4 110672. 1041.70   4
   2   4  -4 112907. 1547.67   2
   2   4  -3 1599.56 188.922   2
  -2   4   3 1630.00 136.802   4
  -2   4   2 34383.6 692.315   2
   2   4  -2 34451.9 834.107   2
  -2   4   2 34386.7 647.893   4
  -2   4   1 430.832 85.1830   4
   2   4  -1 431.687 99.6424   2
  -2   4   1 346.767 76.5236   2
   2   4   0 63512.0 1121.06   2
  -2   4   0 62647.5 976.246   2
  -2   4   0 63255.3 967.922   4
  -2   4  -1 672.463 109.921   2
  -2   4  -1 582.230 96.8818   4
  -2   4  -2 1341.90 158.938   4
  -2   4  -2 1263.01 150.813   2
  -2   4  -3 3155.50 244.638   4
  -2   4  -3 3145.35 241.081   2
  -2   4  -4 20705.4 647.944   4
  -2   4  -4 20710.0 639.985   2
  -2   4  -5 1178.67 163.323   4
  -2   4  -5 1518.18 182.115   2
  -2   4  -6 93237.3 1475.08   2
  -2   4  -6 92653.0 1475.89   4
  -2   4  -7 8912.94 476.688   2
  -2   4  -8 17101.9 688.883   2
  -2   4  -9 104.208 71.7899   2
  -2   4 -10 581.600 151.498   2
  -2   4 -11 642.424 157.683   2
  -2   4 -12 11343.0 670.977   2
  -2   4 -13 1843.60 277.532   2
  -2   4 -14 29626.3 1166.09   2
  -2   4 -15 3952.38 435.001   2
  -2   4 -15 3663.85 263.933   7
  -2   4 -16 11052.5 753.606   2
  -2   4 -16 11238.1 475.061   7
  -2   4 -17 792.653 135.638   7
  -2   4 -18 7378.72 393.800   7
  -2   4 -19 790.433 141.643   7
  -2   4 -20 1533.61 179.066   7
  -2   4 -21 466.058 96.2281   7
  -2   4 -22 715.485 114.338   7
  -2   4 -23-16.3839 39.3279   7
  -2   4 -24 2393.96 155.049   7
   2   4  24 2678.83 184.083   5
  -2   4 -25 1532.67 100.765   7
   2   4  25 1673.44 124.555   5
  -2   5  26 1860.11 146.533   5
  -2   5  18 5384.75 351.384   6
  -2   5  18 5155.84 288.134   9
  -2   5  17 1027.09 157.990   6
  -2   5  17 1227.22 146.381   9
  -2   5  16 46940.4 889.482   9
   2   5 -16 47469.3 1489.42   2
  -2   5  16 46531.6 994.738   6
  -2   5  15 917.590 139.935   6
  -2   5  15 833.031 121.556   9
   2   5 -15 752.326 187.247   2
  -2   5  14 2357.27 213.709   6
   2   5 -14 2236.46 309.776   2
  -2   5  14 2403.34 195.026   9
   2   5 -13 162.274 92.4834   2
   2   5 -12 54950.3 1461.30   2
   2   5 -11 460.609 135.241   2
   2   5 -10 4832.99 418.612   2
   2   5  -9 376.492 116.035   2
   2   5  -8 20506.8 804.048   2
   2   5  -7 222.668 102.347   2
   2   5  -6 25241.0 858.063   2
   2   5  -5 246.785 94.3123   2
   2   5  -4 21316.8 763.253   2
   2   5  -3 84.0623 65.0475   2
  -2   5   3 42.4000 28.4088   4
  -2   5   2 12476.3 429.024   4
  -2   5   2 13668.7 514.980   2
   2   5  -2 13037.2 584.219   2
  -2   5   1-14.9049 30.3947   4
  -2   5   1 54.7152 53.7494   2
   2   5  -1 77.5325 81.3452   2
   2   5   0 7739.38 443.027   2
  -2   5   0 6874.61 349.183   4
  -2   5   0 7387.23 393.174   2
  -2   5  -1 647.333 129.522   2
  -2   5  -1 769.867 130.496   4
  -2   5  -2 13586.9 535.659   4
  -2   5  -2 14168.2 568.947   2
  -2   5  -3 22.4664 65.6178   2
  -2   5  -3 17.9547 55.8929   4
  -2   5  -4 23979.6 784.918   2
  -2   5  -5 1759.91 220.383   2
  -2   5  -6 2457.01 269.265   2
  -2   5  -7 2392.41 272.642   2
  -2   5  -8 8752.63 543.777   2
  -2   5  -9 1101.55 202.795   2
  -2   5 -10 8504.22 579.942   2
  -2   5 -11 1150.59 214.828   2
  -2   5 -12 6830.55 559.430   2
  -2   5 -13 840.686 193.015   2
   2   5  13 1325.04 139.565   9
  -2   5 -14 9710.44 706.636   2
   2   5  21-1.44820 51.4851   5
   2   5  22 631.112 109.847   5
   2   5  23 1822.49 162.559   5
   2   5  24 1569.70 129.612   5
  -2   6  25 57.5687 42.6558   5
   2   6 -25 20.5577 26.0407  14
  -2   6  24 1376.93 139.920   5
  -2   6  23-37.8160 38.6953  12
  -2   6  19 6.32032 48.1714   9
  -2   6  18 341.658 90.4009   9
  -2   6  17 56.3170 57.5207   9
  -2   6  16 2592.31 222.526   9
  -2   6  16 2310.10 225.227   6
  -2   6  15 227.531 78.4127   6
  -2   6  15 197.503 70.6769   9
  -2   6  14 13026.1 509.652   6
  -2   6  14 12977.7 492.080   9
   2   6 -14 12736.7 772.114   2
   2   6 -13 1130.03 227.113   2
  -2   6  13 1351.39 163.294   9
  -2   6  13 1285.14 160.629   6
  -2   6  12 1325.00 151.293   6
   2   6 -12 1338.07 237.664   2
  -2   6  12 1549.76 172.637   9
   2   6 -11 348.593 132.589   2
  -2   6  11 249.226 60.4704   9
   2   6 -10 16168.6 815.596   2
   2   6  -9 253.484 87.6289   2
   2   6  -8 11300.3 660.542   2
   2   6  -7 158.449 108.521   2
   2   6  -6 13404.7 696.263   2
   2   6  -5 64.1676 69.0172   2
   2   6  -4 2708.23 304.337   2
   2   6  -3 527.725 143.792   2
   2   6  -2 40202.6 1144.90   2
   2   6  -1 28.9259 88.8425   2
  -2   6   1 140.573 98.4600   2
  -2   6   0 9220.14 491.539   2
  -2   6  -1 529.682 127.388   2
  -2   6  -2 159353. 2160.99   2
  -2   6  -3 2401.16 268.199   2
  -2   6  -4 20575.2 813.145   2
  -2   6  -5 1633.97 236.650   2
  -2   6  -6 32811.2 1079.46   2
  -2   6  -7 798.894 176.118   2
  -2   6  -8 43429.8 1313.09   2
  -2   6  -9 6964.50 545.794   2
  -2   6 -10 8194.24 614.107   2
   2   6  10 8272.62 366.460   9
  -2   6 -11 1990.28 313.622   2
   2   6  11 2140.72 194.214   9
  -2   6 -12 12473.1 784.254   2
   2   6  12 12938.9 461.558   9
   2   6  13 5769.55 303.199  12
   2   6  13 6513.91 328.140   9
   2   6  14 6156.38 315.683  12
   2   6  14 6690.61 327.762   9
   2   6  15 445.349 100.341  12
   2   6  15 733.526 111.982   9
   2   6  16 8350.12 345.490  12
   2   6  17 965.278 166.082   5
   2   6  18 476.742 117.861   5
   2   6  19 544.159 119.126   5
   2   6  20 1285.14 164.417   5
   2   6  21 126.059 71.9043   5
  -2   6 -22 1301.76 126.430  14
   2   6  22 1301.85 135.330   5
   2   6  23 90.2698 43.1550   5
  -2   6 -23 132.584 42.9977  14
  -2   7  23-33.6183 38.3814   5
  -2   7  22 2019.99 127.699  12
  -2   7  22 2106.98 176.075   5
  -2   7  21-4.06421 43.9750  12
  -2   7  21 148.606 67.5853   5
  -2   7  20 253.401 65.3931  12
  -2   7  20 140.718 76.6612   5
  -2   7  20 297.929 58.9754   9
  -2   7  19 53.0776 59.1821   5
  -2   7  19 201.634 63.5002   9
  -2   7  18 1647.09 161.192   9
  -2   7  17 40.1984 58.1040   9
  -2   7  16 3410.66 253.230   9
  -2   7  15 389.803 97.5568   9
  -2   7  14 12821.6 501.424   9
  -2   7  13 226.885 89.1685   9
  -2   7  12 6859.76 371.293   9
  -2   7  11 435.389 89.5019   9
  -2   7  10 9669.93 433.216   9
   2   7 -10 10085.0 380.500  11
   2   7 -10 10326.9 688.947   2
  -2   7  10 9077.43 447.633   5
   2   7  -9 539.668 172.880   2
  -2   7   9 386.096 86.9926   9
   2   7  -9 484.232 98.1124  11
  -2   7   9 359.476 111.704   5
  -2   7   8 10261.6 430.659   9
   2   7  -8 9929.02 384.641  11
   2   7  -8 10114.4 672.184   2
   2   7  -7-180.404 103.235   2
  -2   7   7 40.3348 48.5047   9
   2   7  -6 18105.8 885.600   2
   2   7  -5 735.979 197.853   2
   2   7  -4 48276.8 1387.50   2
   2   7  -3 245.826 123.236   2
  -2   7  -2 4998.20 415.425   2
  -2   7  -3 932.645 204.205   2
  -2   7  -4 52661.5 1417.94   2
  -2   7  -5 96.4262 104.758   2
   2   7   5 58.0955 66.5977   5
   2   7   5 119.549 63.4813  12
   2   7   6 21945.5 690.985   5
   2   7   6 23255.1 634.435   9
   2   7   6 22700.3 628.265  12
  -2   7  -6 23355.1 994.257   2
   2   7   7 517.287 126.807   5
   2   7   7 617.547 109.101  12
  -2   7  -7 422.001 170.723   2
   2   7   7 546.117 110.416   9
   2   7   8 991.385 137.639  12
  -2   7  -8 622.058 184.724   2
   2   7   8 1125.72 160.722   5
   2   7   8 1028.04 146.300   9
   2   7   9 620.222 127.772   5
  -2   7  -9 536.670 124.551   2
   2   7   9 606.100 106.338  12
   2   7   9 890.690 127.620   9
   2   7  10 5426.70 314.104  12
   2   7  10 5614.55 369.402   5
   2   7  10 5619.96 321.334   9
   2   7  11 1968.78 225.278   5
   2   7  11 2058.38 196.075  12
   2   7  11 2101.56 201.933   9
   2   7  12 5880.78 325.418   9
   2   7  12 5730.40 318.344  12
   2   7  12 5799.92 381.488   5
   2   7  13-6.65243 66.7539   5
   2   7  13 58.2324 58.0611  12
   2   7  13-30.6587 55.5031   9
   2   7  14 16936.9 643.195   5
   2   7  14 17544.4 529.245  12
   2   7  14 18729.4 552.772   9
   2   7  15 1320.40 145.611  12
   2   7  15 1585.91 156.525   9
   2   7  15 1436.69 195.889   5
   2   7  16 196.390 59.2240  12
   2   7  16 290.934 101.738   5
   2   7  16 268.139 69.2664   9
  -2   7 -16 186.461 80.4879  14
   2   7  17 842.012 106.028   9
  -2   7 -17 704.736 111.624  14
   2   7  17 732.579 100.256  12
   2   7  17 537.243 126.070   5
   2   7  18 926.969 144.810   5
  -2   7 -18 991.052 128.028  14
  -2   7 -19 248.934 71.2780  14
   2   7  19 205.462 77.2204   5
  -2   7 -20 313.690 66.6890  14
   2   7  20 328.698 84.9374   5
   2   7  21 18.1639 38.4169   5
  -2   7 -21-20.4321 29.0921  14
   2   7  22 87.1467 39.1840   5
  -2   8  21 182.600 40.8772  12
  -2   8  21 282.571 70.6582   5
  -2   8  20 1540.19 147.829   5
  -2   8  20 1381.51 102.873   9
  -2   8  20 1570.06 126.323  12
  -2   8  19 494.733 76.4504   9
  -2   8  19 459.388 79.5775  12
  -2   8  19 489.461 96.4356   5
  -2   8  18 9379.55 355.673  12
  -2   8  18 9234.37 338.443   9
  -2   8  18 8720.40 394.669   5
  -2   8  17 132.497 73.2816   5
  -2   8  17 137.886 60.4808  12
  -2   8  17 88.5429 55.6197   9
  -2   8  16 901.984 147.213   5
  -2   8  16 992.099 135.177  12
  -2   8  16 981.007 133.109   9
  -2   8  15 112.623 69.7695  12
  -2   8  15 159.464 69.3467   9
  -2   8  15 200.749 92.8040   5
  -2   8  14 3132.66 247.628  12
  -2   8  14 3026.93 270.919   5
  -2   8  14 2910.26 231.792   9
  -2   8  13 94.7450 60.6674   5
  -2   8  13 13.6749 58.1026   9
  -2   8  13 65.4086 54.9056  12
  -2   8  12 1781.87 215.141   5
  -2   8  12 1763.90 193.044  12
  -2   8  12 1707.50 186.349   9
  -2   8  11 62.0658 60.7313   9
  -2   8  11-148.868 86.4870   5
  -2   8  11-45.2562 68.3946  12
   2   8 -10 15216.9 471.751  11
  -2   8  10 14600.6 551.911  12
  -2   8  10 14881.8 545.782   9
  -2   8  10 15478.2 593.379   5
   2   8  -9 510.537 99.7857  11
  -2   8   9 575.797 111.320  12
  -2   8   9 683.504 123.079   9
  -2   8   8 16855.5 593.695  12
   2   8  -8 18252.3 546.699  11
  -2   8   8 16930.4 574.377   9
  -2   8   7 376.994 105.640  12
   2   8  -7 455.904 101.511  11
  -2   8   7 318.740 101.168   9
  -2   8   6 1468.70 172.494   9
  -2   8   6 1534.68 180.718  12
   2   8  -5 847.961 221.283   2
  -2   8   5 556.375 115.797  12
  -2   8   5 564.414 110.702   9
  -2   8   4 14816.2 514.932   9
  -2   8   4 14223.4 531.686  12
  -2   8   3 189.898 64.8396   9
   2   8  -3 264.675 72.3720   9
  -2   8   3 213.635 58.8863  12
  -2   8   2 8126.44 390.694  12
  -2   8   2 8201.49 369.060   9
   2   8  -2 8534.75 366.392   9
   2   8  -1 19.6986 46.0146   9
  -2   8   1 51.5790 60.6378   9
  -2   8   1 75.2794 62.4215  12
   2   8   0 14152.1 480.581   9
  -2   8   0 14143.6 501.766  12
   2   8   0 14348.9 528.707  12
   2   8   0 14460.3 513.146   5
   2   8   1 870.705 137.907   5
   2   8   1 695.313 126.586  12
  -2   8  -1 881.408 134.202  12
   2   8   1 691.565 113.273   9
   2   8   2 10948.7 469.698   5
   2   8   2 11437.1 472.755  12
   2   8   2 11432.1 446.101   9
   2   8   3-25.8277 67.1178  12
   2   8   3 50.8551 49.2135   9
   2   8   4 2542.11 230.077  12
   2   8   4 2274.57 204.647   9
   2   8   4 2399.40 230.737   5
   2   8   5 322.163 84.6038  12
   2   8   5 449.110 100.248   9
   2   8   5 377.686 98.8616   5
   2   8   6 15314.7 533.275   9
   2   8   6 15260.6 546.215  12
   2   8   6 14362.4 579.874   5
   2   8   7 669.513 132.671   5
   2   8   7 667.673 122.379   9
   2   8   7 671.669 125.955  12
   2   8   8 1159.57 154.581   9
   2   8   8 1136.67 172.290   5
   2   8   8 1135.60 158.694  12
   2   8   9 329.473 92.8169  12
   2   8   9 347.309 92.0535   5
   2   8   9 252.790 92.7195   9
   2   8  10 7512.92 431.417   5
   2   8  10 7530.33 373.987  12
   2   8  10 7671.53 380.069   9
   2   8  11 346.694 90.6632   9
   2   8  11 357.118 90.1380  12
   2   8  11 400.229 110.180   5
   2   8  12 5104.63 293.827  12
   2   8  12 5195.62 301.729   9
   2   8  12 5271.17 352.612   5
   2   8  13 296.854 81.2406   9
   2   8  13 313.038 82.6749  12
   2   8  13 222.775 94.6493   5
   2   8  14 2402.40 231.968   5
   2   8  14 2455.03 191.668  12
   2   8  14 2810.85 205.889   9
   2   8  15 123.036 57.6482   5
   2   8  15 254.528 68.5166  12
   2   8  15 262.899 67.7967   9
   2   8  16 2490.49 215.367   5
   2   8  16 2455.48 164.508  12
   2   8  16 2669.64 175.302   9
   2   8  17 395.572 67.9288   9
   2   8  17 382.156 59.6805  12
   2   8  17 394.900 90.7871   5
   2   8  18 2287.71 183.207   5
   2   8  19 34.3021 41.9434   5
   2   8  20 1432.68 116.327   5
  -2   9  19 34.0147 25.7161   5
  -2   9  19 69.1631 25.6115   9
  -2   9  18-21.5064 36.8134  12
  -2   9  18 14.6972 36.1751   5
  -2   9  18 52.7198 30.3095   9
  -2   9  17 207.668 60.5178  12
  -2   9  17 174.252 60.4983   5
  -2   9  17 101.385 41.9056   9
  -2   9  16 2851.53 196.696  12
  -2   9  16 2850.40 188.882   9
  -2   9  16 2454.57 190.057   5
  -2   9  15 139.760 66.8979   5
  -2   9  15 142.261 60.4111  12
  -2   9  15 87.1748 55.3399   9
  -2   9  14 244.051 70.8660   9
  -2   9  14 294.278 84.9438   5
  -2   9  14 257.936 73.6584  12
  -2   9  13 41.0689 44.9308   9
  -2   9  13 92.0465 72.1926   5
  -2   9  13 12.2663 56.0669  12
  -2   9  12 6849.65 342.296   9
  -2   9  12 7045.29 363.610  12
  -2   9  11 101.224 73.2868  12
  -2   9  11 156.191 68.6838   9
   2   9 -10 4714.74 244.602  11
  -2   9  10 4815.99 313.450  12
  -2   9  10 4572.04 292.702   9
  -2   9   9 153.022 67.3602   9
  -2   9   9-11.4827 74.3443  12
   2   9  -9 201.993 70.1097  11
  -2   9   8 4172.52 299.155  12
   2   9  -8 4538.87 270.630  11
  -2   9   8 4116.54 279.587   9
   2   9  -7 73.0509 65.9047  11
  -2   9   7 81.3526 62.1943   9
  -2   9   7 152.587 84.3750  12
  -2   9   6 4468.57 293.086   9
  -2   9   6 4908.24 326.922  12
   2   9  -6 4781.97 292.859  11
  -2   9   5 2.21757 62.1997   9
  -2   9   5-11.6552 57.4503  12
   2   9  -5-17.8958 67.8078  11
  -2   9   4 1805.04 201.809  12
  -2   9   4 2022.08 196.244   9
  -2   9   3-34.6445 58.9808   9
  -2   9   3-30.6377 60.9518  12
   2   9  -3 91.1927 44.5818   9
  -2   9   2 991.058 154.810  12
  -2   9   2 1063.52 140.435   9
   2   9  -2 1077.73 143.299   9
  -2   9   1 52.4920 48.1584   9
   2   9  -1 67.8339 48.3512   9
   2   9   0 9864.74 417.768   9
   2   9   1-1.07137 50.9915   9
   2   9   2 3256.62 254.660   5
   2   9   2 2887.38 228.577   9
   2   9   3 676.504 133.716  12
   2   9   3 654.617 129.192   5
   2   9   3 543.906 104.625   9
   2   9   4 7051.52 359.971   9
   2   9   4 7551.53 392.593  12
   2   9   4 7374.11 394.615   5
   2   9   5 121.650 69.0038   5
   2   9   5 44.1539 65.7568  12
   2   9   5 203.879 84.3247   9
   2   9   6 2168.80 211.509  12
   2   9   6 2037.30 197.673   9
   2   9   6 2032.79 217.809   5
   2   9   7 82.6316 55.0705   5
   2   9   7 105.356 73.2367   9
   2   9   7 144.093 64.0708  12
   2   9   8 3279.84 270.694   5
   2   9   8 3252.09 249.631  12
   2   9   8 3047.04 237.101   9
   2   9   9-117.222 73.6511   9
   2   9   9 3.35119 58.4744   5
   2   9   9-8.10729 68.3147  12
   2   9  10 5208.17 325.328   5
   2   9  10 5588.66 304.813  12
   2   9  10 5619.17 304.683   9
   2   9  11 28.7334 55.7783   5
   2   9  11 147.901 64.6534   9
   2   9  11 101.922 63.1534  12
   2   9  12 433.940 101.100   5
   2   9  12 363.283 82.5413   9
   2   9  12 346.213 83.9510  12
   2   9  13 189.117 65.4385  12
   2   9  13 179.503 64.4815   9
   2   9  13 179.707 72.0930   5
   2   9  14 568.876 87.8312  12
   2   9  14 788.029 116.634   5
   2   9  14 837.192 102.542   9
   2   9  15 62.1361 48.6694   5
   2   9  15 112.768 43.5623   9
   2   9  16 3542.43 206.175   5
   2   9  16 3304.71 159.328   9
   2   9  17 314.919 65.3760   5
   2   9  17 325.119 42.7417   9
  -2  10  16 420.074 60.7833  12
  -2  10  16 366.193 57.2571   9
  -2  10  15 208.902 53.1556  12
  -2  10  15 214.244 51.1085   9
  -2  10  14 2232.16 163.304  12
  -2  10  14 2221.53 153.386   9
  -2  10  13 67.4119 42.5487   9
  -2  10  13 114.479 54.4690  12
  -2  10  12 594.665 90.0807   9
  -2  10  12 339.126 83.3199  12
  -2  10  11 99.6994 60.5536  12
  -2  10  11 180.343 62.9054   9
  -2  10  10 4775.98 280.052  12
  -2  10  10 4634.84 262.147   9
  -2  10   9 200.755 80.8555  12
  -2  10   9 254.530 75.7823   9
   2  10  -9 200.299 57.9767  11
  -2  10   8 2533.12 204.686   9
  -2  10   8 2647.27 220.452  12
   2  10  -8 2509.14 174.021  11
  -2  10   7 466.807 105.649  12
   2  10  -7 417.055 85.6550  11
  -2  10   7 363.511 85.7125   9
   2  10  -6 1789.88 162.570  11
  -2  10   6 2185.18 206.127  12
  -2  10   6 2127.28 186.082   9
  -2  10   5 161.608 71.5302   9
  -2  10   5 144.453 71.1660  12
   2  10  -5 276.320 89.2106  11
   2  10  -4 254.741 78.0868  11
  -2  10   4 155.377 62.9509   9
  -2  10   3 55.6089 54.8313   9
   2  10  -3 71.6112 54.0329  11
  -2  10   2 615.119 99.0859   9
   2  10  -2 685.326 107.153   9
   2  10  -1 3.05949 50.7098   9
   2  10   0 6094.59 307.040   9
   2  10   1-53.7118 54.9569   9
   2  10   2 6221.88 316.684   9
   2  10   3 257.324 83.4070   9
   2  10   4 3978.02 246.766   5
   2  10   4 4069.87 253.830   9
   2  10   5 25.1212 47.4210   9
   2  10   5-82.4050 67.1085   5
   2  10   6 4409.94 259.885   9
   2  10   6 4557.37 273.033   5
   2  10   7 218.512 70.1542   5
   2  10   7 170.314 66.2136   9
   2  10   8 2772.26 209.659   5
   2  10   8 2697.35 198.552   9
   2  10   9 286.794 70.0242   5
   2  10   9 366.358 80.5243   9
   2  10  10 880.765 117.499   5
   2  10  10 1116.41 121.963   9
   2  10  11 36.8563 44.9027   9
   2  10  11 25.4372 42.3099   5
   2  10  12 1228.41 114.046   9
   2  10  12 1157.17 114.948   5
   2  10  13 686.465 81.7787   9
   2  10  13 680.813 86.1475   5
   2  10  14 1833.29 121.558   5
   2  10  14 1821.72 113.845   9
  -2  11  11 149.048 45.5802   9
  -2  11  10 241.184 55.8493   9
  -2  11   9-29.1833 45.2819   9
  -2  11   8 82.7914 47.3435   9
   2  11  -7 184.934 41.8913  11
  -2  11   7 159.543 48.1654   9
   2  11  -6 588.558 78.6341  11
  -2  11   6 507.651 80.7026   9
   2  11  -5 47.1040 38.1940  11
  -2  11   5 42.2254 33.8174   9
   2  11  -4 321.823 72.3915  11
  -2  11   4 253.043 61.3299   9
  -2  11   3 53.0251 42.7512   9
   2  11  -3 82.1292 55.5288  11
   2  11  -2 1723.67 148.277  11
  -2  11   1 25.2926 39.7933  11
   2  11  -1-31.6550 61.0036  11
   2  11  -1 121.204 44.9743   9
   2  11   0 7148.47 273.555   9
   2  11   0 7147.36 301.195  11
  -2  11   0 7462.89 252.671  11
   2  11   1 202.235 57.5003   9
   2  11   1 117.083 55.9723  11
   2  11   2 316.817 67.4689   9
   2  11   3 59.0496 39.4426   9
   2  11   4 7340.62 285.020   9
   2  11   5 74.5940 49.9997   9
   2  11   6 67.1505 37.1210   9
   2  11   7 379.889 70.3574   9
   2  11   8 4581.54 206.373   9
   2  11   9 99.8444 39.3630   9
   2  11  10 5176.90 193.172   9
  -3  -8   4 20975.7 1009.70   1
  -3  -8   3 276.859 135.041   1
  -3  -8   2 959.289 217.467   1
  -3  -8   0 28494.5 1183.01   1
  -3  -8  -1 1446.84 296.505   1
  -3  -7   8 9253.54 652.843   1
  -3  -7   7 777.322 195.836   1
  -3  -7   6 2821.59 363.577   1
  -3  -7   5 127.247 89.0863   1
  -3  -7   4 8908.66 624.021   1
  -3  -7   3 788.761 200.442   1
  -3  -7   2 2223.66 309.004   1
  -3  -7   1 272.221 108.847   1
  -3  -7   0 1706.45 273.813   1
  -3  -7  -1-385.548 135.457   1
  -3  -7  -2 7374.81 583.392   1
  -3  -7  -3 948.258 203.959   1
  -3  -7  -4 9068.83 632.059   1
  -3  -7  -5 219.260 58.3038   1
  -3  -7  -6 3634.45 393.149   1
  -3  -7  -7 15.0766 87.6130   1
  -3  -7  -8 1320.40 252.324   1
   3  -6 -25-15.3851 28.0236   8
   3  -6 -24 211.307 56.1465   8
   3  -6 -23 351.483 72.4740   8
   3  -6 -22 4192.93 243.733   8
   3  -6 -21 180.604 63.2305   8
   3  -6 -20 10871.1 423.182   8
   3  -6 -19 1068.64 137.295   8
   3  -6 -18 2091.38 194.712   8
   3  -6 -17 965.683 133.210   8
   3  -6 -16 17513.7 539.767   8
  -3  -6   5 78.8512 84.5784   1
  -3  -6   4 5531.92 443.184   1
  -3  -6   3 193.023 104.995   1
  -3  -6   2 2546.13 299.467   1
  -3  -6   1 450.905 163.047   1
   3  -6   0 31562.6 893.813   1
  -3  -6   0 32189.8 1083.24   1
   3  -6   1 973.932 164.880   1
  -3  -6  -1 629.400 152.758   1
   3  -6   2 46069.1 1148.28   1
  -3  -6  -2 48544.6 1364.24   1
  -3  -6  -3 836.666 186.234   1
  -3  -6  -4 11525.1 672.263   1
  -3  -6  -5 1096.55 201.805   1
   3  -6   5 1206.94 185.173   3
  -3  -6  -6 19800.4 877.380   1
   3  -6   6 19632.7 756.554   3
   3  -6   7 961.734 181.618   3
  -3  -6  -7 1065.73 199.437   1
  -3  -6  -8 13915.7 732.558   1
   3  -6   8 14706.9 713.341   3
   3  -6   9 1456.19 236.212   3
  -3  -6  -9 1529.58 257.481   1
  -3  -6 -10 811.883 164.591   1
   3  -6  10 827.840 198.568   3
  -3  -6 -11 2.41752 31.8477   1
   3  -6  11 423.635 160.143   3
  -3  -6 -16 4853.72 277.169   8
  -3  -6 -17 1971.57 175.688   8
  -3  -6 -18 1759.34 161.691   8
  -3  -6 -19 921.531 111.981   8
  -3  -6 -20 3176.62 194.141   8
  -3  -6 -21 231.215 50.9719   8
  -3  -6 -22 957.124 82.5293   8
   3  -5 -26 296.393 45.3336   7
   3  -5 -26 334.532 63.6268   8
   3  -5 -25 143.315 41.9617   7
   3  -5 -25 200.735 63.4533   8
   3  -5 -24 2273.96 184.206   8
   3  -5 -24 2521.16 173.415   7
   3  -5 -23 106.003 50.0443   7
   3  -5 -23 150.092 61.5611   8
   3  -5 -22 4773.39 270.574   7
   3  -5 -22 5704.91 322.353   8
   3  -5 -21 296.971 82.4450   8
   3  -5 -21 247.823 68.8115   7
   3  -5 -20 678.722 123.100   8
   3  -5 -20 445.059 90.0233   7
   3  -5 -19 990.281 145.520   8
   3  -5 -19 885.937 131.632   7
   3  -5 -18 8281.68 379.379   7
   3  -5 -18 7832.64 391.189   8
   3  -5 -17 297.023 79.5060   7
  -3  -5  16 9554.06 618.315   3
   3  -5 -16 8591.89 373.553   7
  -3  -5  15 1564.00 235.138   3
  -3  -5  14 9818.79 587.824   3
  -3  -5  13 1094.33 189.382   3
  -3  -5  12 17540.0 735.977   3
  -3  -5  11 245.293 91.8403   3
  -3  -5  10 2851.82 274.458   3
  -3  -5   9 309.705 86.4206   3
  -3  -5   8 26106.6 736.696   3
  -3  -5   7 1203.87 153.139   3
  -3  -5   6 33352.4 723.891   3
   3  -5  -6 33422.1 743.323   1
   3  -5  -5 48.7183 36.6303   1
   3  -5  -4 8712.56 395.189   1
  -3  -5   3 466.161 120.577   1
   3  -5  -3 286.606 85.9770   1
  -3  -5   2 166285. 2177.73   1
   3  -5  -2 166542. 1753.31   1
  -3  -5   1 2986.53 289.600   1
   3  -5  -1 3000.47 207.607   3
   3  -5  -1 3077.89 246.257   1
   3  -5   0 202.613 69.3107   3
  -3  -5   0 137.011 83.0806   1
   3  -5   0 57.7700 55.9726   1
  -3  -5  -1 330.029 120.365   1
   3  -5   1 65.6040 55.8073   3
  -3  -5  -2 28954.5 942.691   1
   3  -5   2 27459.1 735.972   3
  -3  -5  -3 259.073 113.905   1
   3  -5   3 369.118 94.1273   3
   3  -5   4 30571.2 856.788   3
  -3  -5  -4 30679.9 1002.28   1
   3  -5   5 2647.50 270.413   3
  -3  -5  -5 2993.98 312.106   1
  -3  -5  -6 18395.5 785.367   1
   3  -5   6 17560.4 712.111   3
  -3  -5  -7 727.216 167.786   1
   3  -5   7 862.175 182.185   3
   3  -5   8 24060.5 898.797   3
  -3  -5  -8 24286.2 904.945   1
  -3  -5  -9 1374.93 229.231   1
   3  -5   9 940.734 190.996   3
   3  -5  10 111.284 58.3074   3
  -3  -5 -10 417.521 151.157   1
   3  -5  11 466.651 127.863   3
  -3  -5 -11 524.228 122.307   1
  -3  -5 -12 985.638 181.801   1
   3  -5  12 1763.83 288.605   3
  -3  -5 -13 1475.03 232.501   1
  -3  -5 -13 2047.46 186.259   8
   3  -5  13 1247.13 227.847   3
  -3  -5 -14 2127.37 197.971   8
  -3  -5 -15 4772.99 298.954   8
  -3  -5 -16 10404.3 452.795   8
  -3  -5 -17 362.754 100.949   8
  -3  -5 -18 5435.78 324.914   8
  -3  -5 -19 1105.13 143.816   8
  -3  -5 -20 512.674 100.805   8
  -3  -5 -21 569.313 99.0709   8
  -3  -5 -22 79.9185 44.9866   8
  -3  -5 -23 85.2617 40.4389   8
  -3  -5 -24 1028.56 89.5219   8
   3  -4 -27 141.611 46.2911   8
   3  -4 -27 238.308 55.0449   7
   3  -4 -26 2854.01 184.812   7
   3  -4 -26 3108.86 205.646   8
   3  -4 -25 235.165 77.1874   8
   3  -4 -25 358.056 81.7784   7
   3  -4 -24 926.329 127.421   7
   3  -4 -24 1116.78 143.478   8
   3  -4 -23-37.7209 48.3097   8
   3  -4 -23-6.36035 49.2281   7
   3  -4 -22 2581.55 226.181   7
   3  -4 -22 2556.09 234.614   8
   3  -4 -21-40.1767 48.2336   7
   3  -4 -21 168.706 78.6554   8
   3  -4 -20 1131.00 162.407   8
   3  -4 -20 1232.57 165.776   7
   3  -4 -19 180.728 64.9969   7
   3  -4 -18 2676.70 230.731   7
   3  -4 -17 583.759 109.730   7
  -3  -4  17 860.553 185.155   3
   3  -4 -16 11567.1 437.368   7
  -3  -4  16 11140.9 665.332   3
  -3  -4  15 786.199 177.792   3
  -3  -4  14 28043.5 987.391   3
  -3  -4  13 324.461 110.725   3
  -3  -4  12 5822.13 420.390   3
   3  -4 -12 5530.45 303.502   1
   3  -4 -11 209.746 69.3357   1
  -3  -4  11 193.169 72.1418   3
   3  -4 -10 9012.35 360.028   1
  -3  -4  10 8856.01 471.124   3
   3  -4  -9 722.445 100.448   1
  -3  -4   9 656.672 126.268   3
   3  -4  -8 16069.2 454.528   1
  -3  -4   8 15955.3 565.157   3
   3  -4  -7 725.636 103.360   1
  -3  -4   7 565.665 115.412   3
  -3  -4   6 12087.8 430.863   3
   3  -4  -6 12042.5 386.263   1
  -3  -4   5 612.536 97.7921   3
   3  -4  -5 543.141 88.7833   1
   3  -4  -4 134053. 1321.07   1
  -3  -4   4 136070. 1213.89   3
   3  -4  -3 893.757 113.034   1
  -3  -4   3 853.809 92.0381   3
  -3  -4   2 16727.0 604.529   1
   3  -4  -2 16065.4 460.159   1
  -3  -4   2 16873.3 331.112   3
  -3  -4   1 716.229 125.896   1
   3  -4  -1 647.165 103.006   1
   3  -4   0 49910.8 861.689   3
  -3  -4   0 51388.9 1073.90   1
  -3  -4  -1 3791.72 301.493   1
   3  -4   1 4069.78 261.019   3
   3  -4   2 27983.1 709.048   3
  -3  -4  -2 29549.4 844.964   1
   3  -4   3 2075.38 211.307   3
  -3  -4  -3 2418.28 249.153   1
   3  -4   4 7241.45 395.254   3
  -3  -4  -4 8544.14 479.788   1
  -3  -4  -5 294.439 126.395   1
   3  -4   5 331.148 95.2814   3
   3  -4   6 46441.8 1107.35   3
  -3  -4  -6 46548.8 1131.16   1
  -3  -4  -7 5208.07 388.464   1
   3  -4   7 4573.57 360.752   3
  -3  -4  -8 12755.6 605.419   1
   3  -4   8 11872.7 607.476   3
   3  -4   9 1530.25 224.174   3
  -3  -4  -9 1521.31 213.029   1
   3  -4  10 37390.1 1159.91   3
  -3  -4 -10 36112.5 1065.96   1
   3  -4  11 1750.09 261.355   3
  -3  -4 -11 2059.09 261.826   1
   3  -4  12 3567.66 387.519   3
  -3  -4 -12 3763.74 358.779   1
   3  -4  13 987.016 207.722   3
  -3  -4 -13 1368.18 225.681   1
  -3  -4 -14 1084.05 148.130   8
   3  -4  14 833.594 194.226   3
  -3  -4 -14 917.976 180.996   1
  -3  -4 -15 1065.64 211.272   1
  -3  -4 -15 812.085 137.930   8
  -3  -4 -16 3300.97 267.799   8
  -3  -4 -17 207.907 72.3588   8
  -3  -4 -18 1962.20 210.237   8
  -3  -4 -19 286.752 66.8783   7
  -3  -4 -19 286.373 93.7624   8
  -3  -4 -20 580.810 118.597   8
  -3  -4 -20 589.720 99.7638   7
  -3  -4 -21-3.97945 54.7176   8
  -3  -4 -21 44.8514 45.8052   7
  -3  -4 -22 550.489 99.6146   8
  -3  -4 -22 671.341 93.9566   7
  -3  -4 -23-18.6435 56.8804   8
  -3  -4 -24 473.633 84.6591   8
  -3  -4 -25 14.9552 29.1608   8
   3  -3 -28 5357.39 225.290   7
   3  -3 -28 5496.29 234.606   8
   3  -3 -27 157.880 58.6743   7
   3  -3 -27 81.8120 49.8146   8
   3  -3 -26 810.184 114.545   7
   3  -3 -26 759.461 112.981   8
   3  -3 -25 237.792 76.5661   8
   3  -3 -25 272.074 79.3044   7
   3  -3 -24 1575.47 179.626   8
   3  -3 -24 1520.87 175.662   7
   3  -3 -23 133.206 75.6711   8
   3  -3 -23 23.5815 48.9249   7
   3  -3 -22 2974.60 257.719   8
   3  -3 -22 3404.48 272.957   7
   3  -3 -21 328.163 98.5780   8
   3  -3 -21 455.635 109.758   7
   3  -3 -20 2349.99 228.042   7
  -3  -3  19 536.849 160.102   3
   3  -3 -19 655.998 124.641   7
   3  -3 -18 13591.9 511.770   7
  -3  -3  18 14095.8 764.948   3
  -3  -3  17 831.929 167.786   3
  -3  -3  16 6144.88 482.325   3
   3  -3 -16 5591.79 356.867   1
  -3  -3  15 710.565 162.292   3
   3  -3 -15 603.249 122.502   1
  -3  -3  14 12326.4 637.747   3
   3  -3 -14 12669.7 492.583   1
   3  -3 -13 247.711 68.4288   1
  -3  -3  13 269.633 108.062   3
   3  -3 -12 53869.0 918.471   1
  -3  -3  12 55587.6 1241.41   3
   3  -3 -11 873.710 121.128   1
  -3  -3  11 1169.68 183.779   3
   3  -3 -10 19917.9 497.573   1
  -3  -3  10 20917.9 688.710   3
  -3  -3   9 228.435 83.1970   3
   3  -3  -9 115.586 53.0819   1
   3  -3  -8 124907. 1110.56   1
  -3  -3   8 127243. 1525.37   3
  -3  -3   7 42.6286 53.1279   3
   3  -3  -7 69.7769 29.4622   1
   3  -3  -6 11602.3 312.380   1
  -3  -3   6 11860.2 409.427   3
  -3  -3   5 465.257 79.8217   3
   3  -3  -5 565.011 73.1988   1
  -3  -3   4 6512.62 258.279   3
   3  -3  -4 6618.28 236.265   1
  -3  -3   3 170.108 46.3137   3
   3  -3  -3 228.715 55.9828   1
   3  -3  -2 21064.8 418.557   1
  -3  -3   2 20988.9 374.035   3
  -3  -3   1 779.908 120.018   1
  -3  -3   0 22697.0 623.297   1
  -3  -3  -1 1487.07 169.846   1
  -3  -3  -2 81579.9 512.201   4
  -3  -3  -2 83662.4 1262.83   1
   3  -3   3 13073.7 478.699   3
  -3  -3  -3 13907.9 533.999   1
  -3  -3  -4 5671.05 348.045   1
   3  -3   4 6128.05 345.084   3
   3  -3   5 1228.62 169.451   3
  -3  -3  -5 1050.03 161.492   1
  -3  -3  -6 98525.2 1502.63   1
   3  -3   6 97223.1 1498.76   3
  -3  -3  -7 3758.58 304.028   1
   3  -3   7 3093.18 281.194   3
   3  -3   8 145552. 2009.13   3
  -3  -3  -8 144513. 1884.41   1
   3  -3   9 817.593 163.338   3
  -3  -3  -9 1335.49 193.721   1
   3  -3  10 55791.7 1360.42   3
  -3  -3 -10 53622.3 1208.35   1
  -3  -3 -11 13403.3 622.690   1
   3  -3  11 11950.6 655.169   3
  -3  -3 -12 19298.8 773.493   1
   3  -3  12 19858.5 870.498   3
  -3  -3 -13 3911.12 364.422   1
   3  -3  13 3662.09 391.817   3
  -3  -3 -14 26816.4 968.153   1
   3  -3  14 28215.4 1108.50   3
  -3  -3 -15 474.020 154.543   1
   3  -3  15 491.195 165.161   3
  -3  -3 -15 332.683 90.8264   8
  -3  -3 -15 191.089 55.5753   7
   3  -3  16 337.368 164.692   3
  -3  -3 -16 580.420 183.148   1
  -3  -3 -16 463.022 101.703   8
  -3  -3 -16 351.828 80.6120   7
  -3  -3 -17 2502.62 241.158   8
  -3  -3 -17 2098.08 201.648   7
  -3  -3 -18 11065.0 472.152   7
  -3  -3 -18 11253.2 502.322   8
  -3  -3 -19 241.541 80.4967   7
  -3  -3 -19 239.456 86.2884   8
  -3  -3 -20 917.160 153.119   8
  -3  -3 -20 792.809 127.207   7
  -3  -3 -21 728.494 118.988   7
  -3  -3 -21 899.102 146.752   8
  -3  -3 -22 3865.37 277.889   8
  -3  -3 -22 3110.46 229.523   7
  -3  -3 -23 381.242 88.4663   8
  -3  -3 -23 372.831 80.1100   7
  -3  -3 -24 1054.85 115.391   7
  -3  -3 -24 1168.14 132.926   8
  -3  -3 -25 830.419 104.043   8
  -3  -3 -25 854.605 84.5908   7
   3  -2 -29 215.104 47.5052   8
   3  -2 -29 408.679 64.5041   7
   3  -2 -28 453.115 75.2277   8
   3  -2 -28 541.670 89.0181   7
   3  -2 -27 422.894 82.8124   8
   3  -2 -27 507.398 91.9232   7
   3  -2 -26 5496.81 309.673   7
   3  -2 -26 5777.41 306.985   8
   3  -2 -25-29.7088 57.6371   8
   3  -2 -25 85.9197 65.9057   7
   3  -2 -24 3945.02 289.572   8
   3  -2 -24 4174.48 298.214   7
   3  -2 -23 514.705 112.928   7
   3  -2 -23 680.003 129.895   8
   3  -2 -22 650.582 136.562   7
   3  -2 -22 694.716 132.630   8
   3  -2 -21 346.431 97.8437   8
   3  -2 -21 345.741 99.5525   7
   3  -2 -20 10544.6 476.804   7
   3  -2 -19 841.393 136.622   7
  -3  -2  19 1048.03 221.383   3
   3  -2 -18 4559.91 297.182   7
  -3  -2  18 3560.57 382.666   3
  -3  -2  17 31.3061 102.388   3
   3  -2 -16 7278.67 399.282   2
  -3  -2  16 7866.96 529.472   3
   3  -2 -15 103.781 34.0929   2
   3  -2 -15 124.763 53.5471   1
   3  -2 -14 1263.16 145.280   2
   3  -2 -14 1476.51 173.713   1
  -3  -2  14 1142.04 195.460   3
  -3  -2  13 6017.39 408.998   3
   3  -2 -13 6297.56 334.320   1
   3  -2 -13 5659.34 294.427   2
   3  -2 -12 38769.2 723.948   2
   3  -2 -12 39412.5 777.354   1
  -3  -2  12 39477.0 999.963   3
  -3  -2  11 2942.17 264.909   3
   3  -2 -11 2885.91 196.067   1
   3  -2 -11 2429.41 171.918   2
   3  -2 -10 105503. 1032.80   2
   3  -2 -10 105623. 1091.60   1
  -3  -2  10 104795. 1461.28   3
   3  -2  -9 2089.32 143.171   1
  -3  -2   9 1687.46 183.759   3
   3  -2  -8 57864.9 685.289   1
  -3  -2   8 58554.1 980.482   3
  -3  -2   7 566.365 100.086   3
   3  -2  -7 830.532 79.5806   1
   3  -2  -6 21192.1 343.731   1
  -3  -2   6 21233.0 520.187   3
  -3  -2   5 1481.92 135.668   3
   3  -2  -5 1810.16 91.1755   1
   3  -2  -4 41905.4 402.562   1
  -3  -2   4 40128.7 608.678   3
  -3  -2   3 3422.46 164.063   3
   3  -2  -3 3817.64 121.153   1
   3  -2  -2 17435.5 261.092   1
  -3  -2   2 16559.4 326.570   3
  -3  -2   1 891.026 109.083   1
  -3  -2   0 2817.61 189.661   1
  -3  -2  -1 369.855 78.9431   1
  -3  -2  -1 305.102 39.3896   4
  -3  -2  -2 14787.6 465.960   1
  -3  -2  -2 14877.0 236.237   4
  -3  -2  -3 12838.6 452.458   1
  -3  -2  -3 12037.7 187.738   4
   3  -2   4 415869. 2620.59   3
  -3  -2  -4 414221. 2617.12   1
   3  -2   5 8431.88 397.929   3
  -3  -2  -5 9351.68 404.326   1
  -3  -2  -6 38844.2 849.032   1
   3  -2   6 37932.1 876.119   3
   3  -2   7 97.1988 61.0744   3
  -3  -2  -7 127.639 61.4671   1
  -3  -2  -8 6871.23 386.566   1
   3  -2   8 7265.50 423.255   3
  -3  -2  -9 330.470 103.886   1
   3  -2   9 352.524 115.319   3
  -3  -2 -10 11480.0 535.497   1
   3  -2  10 11340.5 581.419   3
  -3  -2 -11 4605.57 356.476   1
   3  -2  11 4191.22 366.901   3
  -3  -2 -12 43323.5 1117.53   1
   3  -2  12 42231.2 1220.69   3
   3  -2  13 7030.91 519.133   3
  -3  -2 -13 7197.26 478.592   1
  -3  -2 -14 6741.80 479.260   1
   3  -2  14 6281.75 501.515   3
  -3  -2 -15 1113.72 200.782   2
   3  -2  15 1102.60 226.095   3
  -3  -2 -15 1199.78 217.254   1
   3  -2  16 13335.2 769.806   3
  -3  -2 -16 12733.5 709.421   1
  -3  -2 -16 14121.4 517.532   7
  -3  -2 -16 13189.1 712.558   2
  -3  -2 -16 13800.9 529.554   8
  -3  -2 -17 1766.66 197.859   7
  -3  -2 -17 1908.02 270.415   1
  -3  -2 -17 1724.70 201.986   8
   3  -2  17 1388.42 277.371   3
  -3  -2 -17 1837.93 268.116   2
  -3  -2 -18 139.091 70.6750   8
  -3  -2 -18 144.675 76.7070   7
  -3  -2 -19 952.115 150.749   7
  -3  -2 -19 960.682 157.537   8
  -3  -2 -20 12151.1 524.742   8
  -3  -2 -20 11620.7 508.122   7
  -3  -2 -21 117.437 68.2708   8
  -3  -2 -21 41.4339 63.1977   7
  -3  -2 -22 3311.58 263.861   8
  -3  -2 -22 3339.74 260.748   7
  -3  -2 -23 1273.96 157.998   8
  -3  -2 -23 1021.28 140.692   7
  -3  -2 -24 2159.83 192.509   8
  -3  -2 -24 2118.49 182.073   7
  -3  -2 -25 1112.72 126.568   8
  -3  -2 -25 1352.63 129.008   7
  -3  -2 -26 1282.56 107.677   7
  -3  -2 -26 1272.29 114.507   8
   3  -1 -29 375.217 57.9954   8
   3  -1 -29 388.898 68.0828   7
   3  -1 -28 714.937 101.059   7
   3  -1 -28 696.721 90.6164   8
   3  -1 -27 186.444 68.2155   7
   3  -1 -27 171.184 61.4698   8
   3  -1 -26 458.801 103.083   7
   3  -1 -26 233.748 74.8652   8
   3  -1 -25 655.410 119.628   7
   3  -1 -25 630.223 111.642   8
   3  -1 -24 11752.4 483.068   8
   3  -1 -24 11602.2 501.701   7
   3  -1 -23 1049.41 155.591   7
   3  -1 -23 1022.80 156.206   8
   3  -1 -22 1436.78 190.546   7
   3  -1 -22 1399.42 187.456   8
   3  -1 -21 1734.34 203.895   7
   3  -1 -21 1857.10 197.943   8
  -3  -1  20 3448.59 378.881   3
   3  -1 -20 3693.65 283.176   7
  -3  -1  19 502.377 148.650   3
   3  -1 -19 462.735 114.848   7
   3  -1 -18 4328.36 348.095   2
  -3  -1  18 4496.80 423.079   3
   3  -1 -17 1726.15 211.756   2
  -3  -1  17 2058.73 276.163   3
   3  -1 -16 3838.94 303.621   2
  -3  -1  16 3750.01 351.548   3
   3  -1 -15 1532.96 183.620   2
  -3  -1  15 1828.40 241.421   3
  -3  -1  14 18951.7 729.657   3
   3  -1 -14 17778.7 579.415   2
  -3  -1  13 2275.94 247.490   3
   3  -1 -13 1788.71 171.820   2
   3  -1 -12 41210.4 780.169   2
  -3  -1  12 40969.0 968.947   3
   3  -1 -12 40357.9 790.676   1
   3  -1 -11 316.441 72.7073   2
   3  -1 -11 344.589 76.3609   1
  -3  -1  11 396.622 100.742   3
  -3  -1  10 7291.16 372.251   3
   3  -1 -10 6997.50 274.221   2
   3  -1 -10 7438.09 296.015   1
   3  -1  -9 3025.77 174.769   1
   3  -1  -9 2838.70 160.474   2
  -3  -1   9 2455.94 205.951   3
  -3  -1   8 70961.4 1028.46   3
   3  -1  -8 71975.9 755.553   1
   3  -1  -8 70260.4 714.936   2
  -3  -1   7 4.19132 38.2914   3
   3  -1  -7 28.7105 24.9779   1
   3  -1  -7 6.59193 18.3688   2
  -3  -1   6 55838.4 795.157   3
   3  -1  -6 55263.2 523.380   1
   3  -1  -6 55978.5 489.065   2
   3  -1  -5 9730.00 183.964   1
   3  -1  -5 9473.56 164.367   2
   3  -1  -4 105348. 389.389   2
  -3  -1   4 118112. 994.870   3
  -3  -1   3 2533.47 136.513   3
  -3  -1   2 549703. 1840.78   3
  -3  -1   1 16186.2 348.402   1
  -3  -1   1 17146.7 305.507   4
  -3  -1   0 344708. 1319.88   4
  -3  -1   0 346334. 1699.05   1
  -3  -1  -1 1756.33 132.669   1
  -3  -1  -1 1942.69 102.094   4
  -3  -1  -2 983793. 2261.67   4
  -3  -1  -2 999999. 3260.87   1
  -3  -1  -3 16567.9 299.041   4
  -3  -1  -3 17669.8 456.618   1
  -3  -1  -4 186130. 1546.49   1
  -3  -1  -4 186765. 1045.46   4
  -3  -1  -5 1670.98 162.062   1
  -3  -1  -5 1580.89 105.079   4
   3  -1   5 1502.22 163.869   3
  -3  -1  -6 13920.2 326.831   4
  -3  -1  -6 13729.5 465.859   1
   3  -1   6 14102.2 496.832   3
  -3  -1  -7 1233.02 148.579   1
   3  -1   7 1172.06 162.007   3
  -3  -1  -8 10340.9 441.583   1
   3  -1   8 10794.2 494.974   3
  -3  -1  -9 1038.85 152.745   1
   3  -1   9 787.415 142.507   3
   3  -1  10 45870.7 1105.32   3
  -3  -1 -10 44616.6 1011.20   1
  -3  -1 -11 7289.97 438.518   1
   3  -1  11 6393.02 429.619   3
   3  -1  12 1946.14 250.248   3
  -3  -1 -12 2281.73 248.944   1
  -3  -1 -13 8298.81 503.579   1
   3  -1  13 8216.11 531.206   3
   3  -1  14 27386.9 1006.66   3
  -3  -1 -14 26245.4 939.658   1
  -3  -1 -14 27327.4 965.541   2
   3  -1  15 964.849 199.439   3
  -3  -1 -15 1332.37 226.616   1
  -3  -1 -15 1326.80 219.158   2
  -3  -1 -16 3772.47 280.303   8
  -3  -1 -16 3499.18 377.015   2
  -3  -1 -16 3884.58 279.925   7
  -3  -1 -16 3401.08 371.791   1
   3  -1  16 3663.86 387.223   3
  -3  -1 -17 3066.42 360.431   2
  -3  -1 -17 2691.48 234.459   8
   3  -1  17 2433.47 319.213   3
  -3  -1 -17 2648.65 238.411   7
  -3  -1 -18 9014.11 447.633   7
  -3  -1 -18 9297.57 450.802   8
  -3  -1 -19 490.150 118.151   8
  -3  -1 -19 440.638 107.470   7
  -3  -1 -20 3041.98 269.267   7
  -3  -1 -20 3178.80 271.692   8
  -3  -1 -21 460.608 107.528   8
  -3  -1 -21 427.744 116.111   7
  -3  -1 -22 2431.56 227.153   8
  -3  -1 -22 2528.47 238.526   7
  -3  -1 -23 410.858 99.2434   7
  -3  -1 -23 538.085 110.564   8
  -3  -1 -24 2079.40 193.201   7
  -3  -1 -24 2106.96 187.980   8
  -3  -1 -25 1123.78 132.093   7
  -3  -1 -25 1050.71 123.371   8
  -3  -1 -26 409.956 74.0508   7
  -3  -1 -26 494.012 73.8580   8
   3   0 -29 39.5629 41.9630   7
   3   0 -28 871.744 97.1668   8
   3   0 -28 910.660 115.884   7
   3   0 -27 322.108 83.5225   7
   3   0 -27 319.611 71.4833   8
   3   0 -26 2260.31 185.908   8
   3   0 -26 2251.97 206.696   7
   3   0 -25 160.619 63.6323   8
   3   0 -25 120.056 67.2699   7
   3   0 -24 838.117 128.274   8
   3   0 -24 861.188 140.327   7
   3   0 -23 204.917 74.7856   8
   3   0 -23 295.319 95.3144   7
   3   0 -22 13793.9 559.181   7
   3   0 -22 13292.9 514.655   8
   3   0 -21 14.8162 70.8607   7
   3   0 -21 51.7196 64.2833   8
  -3   0  20 6622.36 500.749   3
   3   0 -20 6442.46 347.529   8
   3   0 -20 6768.96 375.334   7
   3   0 -20 6260.42 459.721   2
   3   0 -19 2212.25 278.142   2
   3   0 -19 2125.32 205.049   7
  -3   0  18 15118.9 731.035   3
   3   0 -18 14242.8 662.199   2
   3   0 -17 3792.06 334.813   2
  -3   0  17 3617.25 354.871   3
   3   0 -16 2259.19 247.166   2
  -3   0  16 1676.86 230.737   3
   3   0 -15 44.0965 35.6933   2
  -3   0  15 190.304 84.2543   3
   3   0 -14 11707.4 496.032   2
  -3   0  14 11903.6 556.878   3
  -3   0  13 6.39382 51.3929   3
   3   0 -13 121.336 68.4419   2
   3   0 -12 4781.54 286.679   2
  -3   0  12 5124.16 327.419   3
   3   0 -11 774.854 110.722   2
  -3   0  11 862.565 138.767   3
   3   0 -10 57531.2 856.131   2
  -3   0  10 58661.2 1009.54   3
  -3   0   9 19.5251 33.1418   3
   3   0  -9 24.0514 34.3395   2
   3   0  -8 4591.76 206.291   2
  -3   0   8 4288.04 241.276   3
  -3   0   7 726.686 98.8313   3
   3   0  -7 668.501 75.9327   2
   3   0  -6 92920.2 772.742   2
  -3   0   6 91120.3 971.616   3
  -3   0   5 1507.88 120.262   3
   3   0  -5 1521.96 90.6285   2
  -3   0   4 4525.39 189.295   3
   3   0  -4 4336.88 135.270   2
  -3   0   3 28.4042 22.9698   4
   3   0  -3 76.0179 24.8158   2
  -3   0   3 63.5904 30.3946   3
  -3   0   2 23781.5 381.615   4
  -3   0   2 22962.4 272.191   1
  -3   0   1 10536.7 203.065   1
  -3   0   1 11048.5 267.666   4
  -3   0   0 639845. 2043.29   4
  -3   0   0 631054. 1776.52   1
  -3   0  -1 10548.4 271.460   4
  -3   0  -1 11632.4 270.068   1
  -3   0  -2 65515.7 687.670   4
  -3   0  -2 64120.5 692.723   1
  -3   0  -3 3850.20 186.144   1
  -3   0  -3 3577.13 169.483   4
  -3   0  -4 6971.49 269.656   1
  -3   0  -4 7529.65 256.815   4
  -3   0  -5 25.5206 37.1164   4
  -3   0  -5 42.5601 48.5282   1
   3   0   5 20.7580 41.0009   3
  -3   0  -6 250.733 60.7043   4
   3   0   6 96.9285 50.5958   3
  -3   0  -7 15009.8 433.268   4
  -3   0  -7 15474.1 496.458   1
   3   0   7 14485.8 500.474   3
  -3   0  -8 41772.5 865.493   1
  -3   0  -8 42178.0 758.847   4
   3   0   8 42180.9 899.112   3
  -3   0  -9 531.087 116.756   1
   3   0   9 232.470 68.0855   3
   3   0  10 16502.9 630.535   3
  -3   0 -10 16417.8 606.746   1
  -3   0 -11 8161.24 455.749   1
  -3   0 -11 8008.02 456.755   2
  -3   0 -12 17333.7 705.488   2
  -3   0 -12 17686.4 712.488   1
   3   0  12 18639.9 730.041   3
  -3   0 -13-41.5755 63.6728   1
  -3   0 -13 94.5719 64.4253   2
   3   0  13-30.9504 52.8098   3
  -3   0 -14 6274.11 469.047   2
  -3   0 -14 6356.62 471.230   1
   3   0  14 6150.81 459.589   3
  -3   0 -15-12.9345 78.1159   2
   3   0  15 365.895 127.216   3
  -3   0 -16 6254.63 340.563   8
  -3   0 -16 5997.26 498.505   2
   3   0  16 6455.54 499.316   3
  -3   0 -16 6060.61 352.855   7
  -3   0 -17 378.353 88.7648   8
  -3   0 -17 232.718 99.2808   2
   3   0  17 376.225 87.9721   3
  -3   0 -17 365.923 94.0654   7
  -3   0 -18 2545.29 248.940   7
  -3   0 -18 2331.07 227.885   8
  -3   0 -19 92.5983 69.8490   8
  -3   0 -19 173.576 83.8832   7
  -3   0 -20 3654.63 300.823   7
  -3   0 -20 3810.48 290.247   8
  -3   0 -21 1370.35 176.660   8
  -3   0 -21 1630.88 201.009   7
  -3   0 -22 30.8279 49.3279   8
  -3   0 -22-0.42912 60.0851   7
  -3   0 -23-47.0986 59.9218   8
  -3   0 -23 124.533 77.0932   7
  -3   0 -24-8.60673 46.3006   8
  -3   0 -24 144.718 64.6927   7
  -3   0 -25 283.516 77.3464   7
  -3   0 -25 313.615 67.2710   8
  -3   0 -26 2033.38 131.558   8
  -3   0 -26 2325.02 167.093   7
   3   1 -29 333.742 58.6953   7
   3   1 -28 663.144 95.3564   7
   3   1 -27 144.177 58.5372   7
   3   1 -26 301.042 62.0662   8
   3   1 -26 224.604 77.5681   7
   3   1 -25 549.487 97.6774   8
   3   1 -25 438.626 102.816   7
   3   1 -24 10572.5 411.510   8
   3   1 -24 11044.6 479.687   7
   3   1 -23 1038.50 148.756   7
   3   1 -23 1046.72 140.401   8
   3   1 -22 1273.62 152.748   8
   3   1 -22 1328.16 179.265   7
  -3   1  22 1269.14 151.731   6
   3   1 -21 1902.78 183.272   8
  -3   1  21 2091.46 200.409   6
   3   1 -21 1781.64 197.536   7
  -3   1  20 3720.19 259.862   6
   3   1 -20 3728.82 376.759   2
   3   1 -20 3777.12 254.661   8
   3   1 -20 3849.03 280.908   7
   3   1 -19 370.251 90.9466   2
   3   1 -19 409.788 97.8971   7
  -3   1  19 643.438 113.556   6
   3   1 -19 477.067 95.9394   8
   3   1 -18 4825.41 400.829   2
  -3   1  18 4600.16 382.190   3
  -3   1  17 2220.17 260.090   3
   3   1 -17 1437.28 208.121   2
   3   1 -16 3413.70 311.458   2
  -3   1  16 3956.38 337.329   3
  -3   1  15 1614.62 204.924   3
   3   1 -15 1235.83 177.064   2
   3   1 -14 17165.1 640.676   2
  -3   1  14 17945.9 648.744   3
   3   1 -13 2305.87 222.314   2
  -3   1  13 2116.81 218.316   3
   3   1 -12 37622.0 854.797   2
  -3   1  12 39393.9 877.710   3
  -3   1  11 386.674 92.2908   3
   3   1 -11 331.720 83.4047   2
  -3   1  10 6033.63 310.034   3
   3   1 -10 5672.57 298.645   2
   3   1  -9 2429.82 184.473   2
  -3   1   9 2805.02 200.879   3
   3   1  -8 77355.8 974.686   2
  -3   1   8 76835.5 976.481   3
  -3   1   8 75341.6 871.542   4
  -3   1   7 38.3231 35.6196   4
  -3   1   7 47.3112 32.3487   3
   3   1  -7 0.21196 35.6628   2
  -3   1   6 53906.6 680.207   4
  -3   1   6 55240.3 736.927   3
   3   1  -6 54770.8 740.081   2
  -3   1   5 8878.70 267.081   4
   3   1  -5 8572.31 276.928   2
  -3   1   5 8950.87 277.406   3
  -3   1   4 112885. 938.969   4
   3   1  -4 113973. 949.071   2
  -3   1   3 2532.52 144.828   4
   3   1  -3 2438.59 136.864   2
  -3   1   2 543138. 2094.43   4
   3   1  -2 541321. 1981.15   2
  -3   1   1 17000.0 373.729   4
  -3   1   1 17167.2 190.666   2
   3   1  -1 16610.8 348.097   2
  -3   1   0 358589. 1748.96   4
  -3   1   0 353912. 1120.67   2
  -3   1  -1 2063.69 104.513   2
  -3   1  -1 1883.55 135.802   4
  -3   1  -1 1982.78 95.4976   1
  -3   1  -2 980725. 3109.62   4
  -3   1  -2 988187. 2601.19   2
  -3   1  -3 17128.2 388.574   2
  -3   1  -3 18345.7 384.079   1
  -3   1  -4 185588. 1391.11   2
  -3   1  -4 183832. 1340.88   1
  -3   1  -4 185383. 1474.73   4
  -3   1  -5 2114.85 166.601   2
  -3   1  -5 2077.14 162.246   1
  -3   1  -5 1682.83 151.020   4
   3   1   5 1643.37 136.529   3
  -3   1  -6 16320.9 485.330   2
  -3   1  -6 16207.1 489.625   4
  -3   1  -6 16104.7 476.477   1
   3   1   6 15282.9 444.216   3
  -3   1  -7 1200.39 148.311   2
  -3   1  -7 1438.00 156.928   1
   3   1   7 1160.54 134.162   3
  -3   1  -7 1110.53 138.456   4
  -3   1  -8 9160.59 399.077   4
  -3   1  -8 8875.75 408.258   2
   3   1   8 9090.57 390.914   3
  -3   1  -8 9763.28 429.170   1
  -3   1  -9 1108.72 156.281   2
  -3   1  -9 922.857 153.788   1
   3   1  10 44402.0 957.418   3
  -3   1 -10 44296.0 1030.23   2
  -3   1 -10 45890.4 1042.81   1
  -3   1 -11 7141.57 440.726   2
   3   1  11 6274.00 381.550   3
  -3   1 -12 2299.26 269.027   2
   3   1  12 2152.61 226.910   3
  -3   1 -13 8382.67 538.017   2
   3   1  13 7389.85 444.016   3
   3   1  14 28633.8 911.870   3
  -3   1 -14 27619.8 1017.63   2
   3   1  15 966.738 180.920   3
  -3   1 -15 1220.77 221.775   2
  -3   1 -16 3924.82 287.761   7
  -3   1 -16 3693.94 402.157   2
  -3   1 -16 3442.36 251.167   8
  -3   1 -17 2653.98 224.331   8
  -3   1 -17 3042.45 377.438   2
  -3   1 -17 2856.02 257.952   7
  -3   1 -18 8991.24 425.171   8
  -3   1 -18 9297.12 469.285   7
  -3   1 -19 449.664 103.581   8
  -3   1 -19 557.263 122.847   7
  -3   1 -20 3012.88 276.625   7
  -3   1 -20 2996.29 247.019   8
  -3   1 -21 559.158 127.393   7
  -3   1 -21 360.281 93.5733   8
  -3   1 -22 2314.73 205.687   8
  -3   1 -22 2910.68 258.512   7
  -3   1 -23 653.328 113.029   8
  -3   1 -23 488.565 104.586   7
  -3   1 -24 2290.86 171.368   8
  -3   1 -24 2399.48 213.178   7
  -3   1 -25 1119.49 133.798   7
  -3   1 -25 1068.74 103.506   8
  -3   1 -26 475.464 81.4710   7
   3   2 -28 434.981 67.6569   7
   3   2 -27 532.399 91.3440   7
   3   2 -26 5113.77 282.355   7
   3   2 -25 106.306 68.0837   7
   3   2 -24 4245.83 287.353   7
   3   2 -23 527.721 115.428   7
   3   2 -22 474.815 111.687   7
  -3   2  22 338.694 86.9374   6
  -3   2  21 402.902 101.906   6
   3   2 -21 268.988 77.2700   7
  -3   2  21 186.049 61.0827  10
  -3   2  20 8851.70 379.507  10
  -3   2  20 9781.09 441.557   6
   3   2 -20 9540.32 433.776   7
   3   2 -20 8278.24 578.367   2
   3   2 -19 752.987 115.580   7
  -3   2  19 659.234 120.238   6
  -3   2  19 809.968 116.766  10
   3   2 -19 952.443 198.812   2
   3   2 -18 3712.09 373.415   2
  -3   2  18 4594.73 289.977   6
   3   2 -17-307.497 103.756   2
   3   2 -16 6783.94 469.173   2
  -3   2  16 7317.76 423.374   3
  -3   2  15 271.233 88.6939   3
   3   2 -15 162.375 83.5323   2
   3   2 -14 1252.72 179.994   2
  -3   2  14 1442.65 183.250   3
  -3   2  13 5835.79 340.370   3
   3   2 -13 5618.77 376.937   2
   3   2 -12 40682.1 975.214   2
  -3   2  12 41246.4 854.700   3
  -3   2  12 40963.6 736.788   4
   3   2 -11 2721.55 245.002   2
  -3   2  11 2240.81 171.119   4
  -3   2  11 2666.91 207.945   3
   3   2 -10 105300. 1428.08   2
  -3   2  10 104242. 1116.41   4
  -3   2  10 104898. 1227.21   3
  -3   2   9 1985.72 150.457   4
  -3   2   9 1846.23 154.458   3
   3   2  -9 1831.44 184.827   2
  -3   2   8 58953.6 804.417   4
  -3   2   8 57892.1 814.253   3
   3   2  -8 59143.8 976.074   2
  -3   2   7 619.849 84.0321   3
  -3   2   7 735.624 90.6252   4
   3   2  -7 623.418 104.908   2
   3   2  -6 19923.8 531.145   2
  -3   2   6 20111.3 453.875   4
   3   2  -5 1602.83 147.403   2
  -3   2   5 1225.15 114.498   4
  -3   2   4 38053.4 610.332   4
   3   2  -4 40556.8 703.126   2
   3   2  -3 3394.32 200.654   2
  -3   2   3 3033.46 174.759   4
  -3   2   2 17594.7 418.190   4
   3   2  -2 16993.6 444.702   2
  -3   2   2 17015.3 254.572   2
   3   2  -1 1013.38 112.033   2
  -3   2   1 1034.91 72.0942   2
  -3   2   1 1036.75 106.714   4
  -3   2   0 3033.64 135.612   2
  -3   2   0 3303.73 195.402   4
  -3   2  -1 386.320 56.2967   2
  -3   2  -1 371.468 69.8568   4
  -3   2  -2 15759.9 373.261   2
  -3   2  -2 15939.8 453.885   4
  -3   2  -3 12688.3 364.588   2
  -3   2  -3 13220.4 428.147   4
   3   2   4 415669. 1698.16   3
  -3   2  -4 422819. 2538.46   4
  -3   2  -5 9293.88 367.603   2
  -3   2  -5 9071.46 391.613   4
   3   2   5 8580.33 267.348   3
  -3   2  -6 36353.2 772.020   2
  -3   2  -6 37232.6 816.821   4
  -3   2  -7 97.6039 63.6408   4
   3   2   7 168.626 46.6581   3
   3   2   8 6543.45 292.551   3
  -3   2  -8 6247.10 365.369   2
  -3   2  -8 5681.58 344.136   4
   3   2   9 336.696 73.2497   3
  -3   2  -9 393.712 107.457   2
  -3   2 -10 13394.9 601.784   2
   3   2  10 12482.5 448.550   3
  -3   2 -11 3859.98 340.592   2
  -3   2 -12 43895.3 1213.39   2
  -3   2 -13 7568.77 531.165   2
  -3   2 -14 7457.06 549.666   2
  -3   2 -15 1088.71 205.452   2
  -3   2 -16 12981.5 777.651   2
  -3   2 -16 14135.8 555.517   7
  -3   2 -17 1543.48 191.380   7
  -3   2 -17 1929.80 192.627   8
  -3   2 -17 1917.57 311.859   2
  -3   2 -18 259.716 90.9436   8
  -3   2 -18 256.692 88.8672   7
  -3   2 -19 954.962 142.725   8
  -3   2 -19 1007.07 159.336   7
  -3   2 -20 10717.6 434.324   8
  -3   2 -20 10922.7 511.141   7
  -3   2 -21 109.219 70.7129   7
  -3   2 -22 3252.65 265.778   7
  -3   2 -23 1054.58 151.240   7
  -3   2 -24 2652.17 210.071   7
  -3   2 -25 1161.29 127.098   7
  -3   2 -26 1202.36 108.975   7
   3   3 -27 130.315 42.8914   7
   3   3 -26 746.991 97.6410   7
   3   3 -25 137.140 53.4300   7
   3   3 -24 1321.86 151.225   7
   3   3 -23 8.02999 45.7462   7
  -3   3  22 3790.08 287.527   6
   3   3 -22 3398.16 252.792   7
  -3   3  21 504.574 113.626   6
   3   3 -21 470.376 103.163   7
  -3   3  20 2536.76 239.868   6
   3   3 -20 2532.59 220.538   7
   3   3 -19 617.751 103.662   7
  -3   3  19 814.051 135.768   6
  -3   3  19 713.181 117.542  10
  -3   3  18 11681.2 447.581  10
  -3   3  18 13041.4 513.277   6
   3   3 -18 12311.3 708.938   2
   3   3 -17 626.682 139.647   2
  -3   3  17 957.732 138.470   6
   3   3 -16 5738.97 464.890   2
   3   3 -15 358.072 130.621   2
   3   3 -14 12935.8 643.972   2
   3   3 -13 566.948 130.852   2
   3   3 -12 52828.2 1200.34   2
   3   3 -11 1083.08 172.706   2
   3   3 -10 21250.7 710.304   2
  -3   3   9 67.7918 28.8396   4
   3   3  -9 150.409 51.7833   2
  -3   3   8 121530. 1107.14   4
   3   3  -8 124158. 1604.06   2
   3   3  -7 47.1770 51.4292   2
  -3   3   7 46.4536 32.1313   4
  -3   3   6 9557.25 313.476   4
   3   3  -6 10107.1 431.754   2
  -3   3   5 466.070 71.7373   4
   3   3  -5 364.742 91.6287   2
  -3   3   4 5319.51 242.819   4
   3   3  -4 5725.71 311.194   2
   3   3  -3 197.548 66.2498   2
  -3   3   3 198.910 55.4069   4
   3   3  -2 18652.1 549.938   2
  -3   3   2 17228.5 374.818   2
  -3   3   2 18179.3 474.543   4
   3   3  -1 759.257 117.403   2
  -3   3   1 718.277 101.387   4
  -3   3   1 786.622 83.8875   2
  -3   3   0 22248.8 560.402   4
  -3   3   0 21860.3 462.471   2
  -3   3  -1 1171.91 115.965   2
  -3   3  -1 1339.49 145.569   4
  -3   3  -2 78852.4 1124.50   4
  -3   3  -2 76263.2 973.172   2
  -3   3  -3 12832.8 476.584   4
  -3   3  -3 13045.4 430.532   2
  -3   3  -4 7388.33 375.681   4
  -3   3  -4 6991.51 333.445   2
  -3   3  -5 991.474 147.095   4
  -3   3  -5 1205.01 149.664   2
  -3   3  -6 93481.6 1358.83   2
  -3   3  -6 95149.0 1440.10   4
  -3   3  -7 3304.60 274.113   2
  -3   3  -7 3059.48 271.942   4
  -3   3  -8 141495. 1887.89   4
  -3   3  -8 139877. 1873.82   2
  -3   3  -9 968.146 174.298   2
  -3   3 -10 56826.0 1332.76   2
  -3   3 -11 11966.3 641.837   2
  -3   3 -12 18397.6 835.203   2
  -3   3 -13 3749.49 394.402   2
  -3   3 -14 28126.3 1107.26   2
  -3   3 -15 447.064 99.4771   7
  -3   3 -15-396.599 145.571   2
  -3   3 -16 341.642 84.7249   2
  -3   3 -16 347.096 95.8827   7
  -3   3 -17 2211.83 229.178   7
  -3   3 -18 11637.5 519.708   7
  -3   3 -19 169.994 77.3376   7
  -3   3 -20 636.499 122.427   7
  -3   3 -21 794.952 137.663   7
  -3   3 -22 3801.18 270.281   7
  -3   3 -23 374.794 87.3137   7
   3   3  23 397.671 86.8401   5
  -3   3 -24 1227.89 131.649   7
   3   3  24 1101.35 107.934   5
  -3   3 -25 873.537 95.7603   7
  -3   4  21 68.4615 57.4134   6
  -3   4  20 1123.11 158.493   6
  -3   4  19 179.653 79.0723   6
  -3   4  18 3113.66 261.326   6
  -3   4  17 480.647 102.660   6
  -3   4  17 475.703 96.1191   9
  -3   4  17 661.831 127.440  10
   3   4 -16 11682.3 699.783   2
  -3   4  16 11602.4 476.639   6
  -3   4  16 11229.3 438.621  10
   3   4 -15 562.198 145.763   2
   3   4 -14 27840.7 1020.12   2
   3   4 -13 288.522 115.256   2
   3   4 -12 6667.46 470.814   2
   3   4 -11-90.8220 75.4342   2
   3   4 -10 9788.33 529.427   2
   3   4  -9 680.322 142.613   2
   3   4  -8 15620.3 640.218   2
  -3   4   7 721.942 86.4346   4
   3   4  -7 747.778 142.262   2
  -3   4   6 13344.7 380.395   4
   3   4  -6 13767.7 573.972   2
  -3   4   5 680.472 94.6887   4
   3   4  -5 831.670 143.518   2
   3   4  -4 131511. 1708.97   2
  -3   4   4 130108. 1293.23   4
   3   4  -3 691.841 133.419   2
  -3   4   3 789.100 108.837   4
   3   4  -2 16984.1 603.077   2
  -3   4   2 16777.5 499.519   4
  -3   4   2 17278.3 464.141   2
  -3   4   1 685.662 97.2286   2
   3   4  -1 603.863 120.635   2
  -3   4   1 781.616 118.349   4
  -3   4   0 46920.4 903.151   4
  -3   4   0 45535.9 808.483   2
  -3   4  -1 3671.61 239.210   2
  -3   4  -1 4185.41 284.873   4
  -3   4  -2 28767.8 757.697   4
  -3   4  -2 27681.8 687.900   2
  -3   4  -3 1887.42 189.604   2
  -3   4  -3 2100.84 214.450   4
  -3   4  -4 10032.9 453.814   2
  -3   4  -4 10258.9 487.646   4
  -3   4  -5 594.456 130.793   4
  -3   4  -5 292.345 80.8583   2
  -3   4  -6 48638.3 1122.59   4
  -3   4  -6 47775.2 1084.57   2
  -3   4  -7 4566.82 361.299   4
  -3   4  -7 4380.09 348.002   2
  -3   4  -8 12779.9 617.384   2
  -3   4  -9 1666.65 234.824   2
  -3   4 -10 34479.9 1113.02   2
  -3   4 -11 2275.03 307.687   2
  -3   4 -12 3548.68 394.788   2
  -3   4 -13 1154.90 231.704   2
  -3   4 -14 973.885 146.483   7
  -3   4 -14 1909.71 323.480   2
  -3   4 -15 1049.57 156.070   7
  -3   4 -15 1102.81 214.330   2
  -3   4 -16 3021.58 255.006   7
  -3   4 -17 255.440 82.6757   7
  -3   4 -18 1897.45 209.451   7
  -3   4 -19 304.774 96.4450   7
  -3   4 -20 885.185 139.390   7
  -3   4 -21-39.5063 52.4240   7
   3   4  22 640.780 111.476   5
  -3   4 -22 775.269 111.462   7
   3   4  23 45.8458 48.6993   5
  -3   4 -23-14.4366 43.6614   7
  -3   4 -24 556.357 72.4266   7
   3   4  24 394.033 68.2837   5
  -3   4 -25 76.8365 46.3408  14
  -3   5  20 593.645 123.842   6
  -3   5  19 974.795 127.803   9
  -3   5  19 841.788 147.699   6
  -3   5  18 8344.45 377.240   9
  -3   5  18 9342.02 455.849   6
  -3   5  17 303.823 75.7683   9
  -3   5  17 335.892 105.258   6
  -3   5  16 9999.44 422.225   9
  -3   5  16 10295.9 462.994   6
   3   5 -16 9767.95 667.374   2
   3   5 -15 795.967 191.832   2
  -3   5  15 899.753 125.305   9
  -3   5  15 986.033 147.190   6
  -3   5  14 9099.24 409.342   6
  -3   5  14 8229.87 377.857   9
   3   5 -14 9364.16 630.814   2
   3   5 -13 971.194 207.867   2
   3   5 -12 17776.6 827.798   2
   3   5 -11-0.73344 66.3712   2
   3   5 -10 1816.03 252.906   2
   3   5  -9-74.6249 83.4473   2
   3   5  -8 27596.2 942.938   2
   3   5  -7 817.611 165.586   2
   3   5  -6 33719.1 1003.51   2
   3   5  -5 119.948 62.4146   2
   3   5  -4 8204.85 484.529   2
  -3   5   4 8873.38 363.795   4
  -3   5   3 482.911 93.9432   4
   3   5  -3 386.517 121.699   2
  -3   5   2 162360. 1705.37   4
  -3   5   2 166368. 1676.16   2
   3   5  -2 164994. 2128.16   2
  -3   5   1 2732.93 227.396   2
  -3   5   1 2713.03 232.596   4
   3   5  -1 3267.85 300.181   2
  -3   5   0 135.786 77.4565   4
  -3   5   0 172.768 65.0884   2
  -3   5  -1 91.5414 44.7933   4
  -3   5  -1 83.6521 50.3264   2
  -3   5  -2 30889.6 857.410   4
  -3   5  -2 30315.1 824.259   2
  -3   5  -3 366.749 114.308   4
  -3   5  -3 430.130 128.212   2
  -3   5  -4 28399.6 860.910   2
  -3   5  -4 28602.0 881.554   4
  -3   5  -5 2454.31 267.482   4
  -3   5  -5 2640.78 275.705   2
  -3   5  -6 17144.8 726.507   2
  -3   5  -7 645.374 164.212   2
  -3   5  -8 25169.0 948.400   2
  -3   5  -9 1210.65 232.437   2
  -3   5 -10 234.696 108.395   2
  -3   5 -11 515.050 135.496   2
  -3   5 -12 1226.56 232.868   2
  -3   5 -13 1661.36 296.460   2
  -3   5 -18 5724.04 315.171   7
  -3   5 -19 921.007 127.742   7
   3   5  19 1085.79 161.085   5
   3   5  20 477.763 110.769   5
   3   5  21 524.770 106.711   5
   3   5  22 69.5281 46.2416   5
   3   5  23 41.9732 40.5890   5
  -3   5 -24 1047.67 98.6606  14
   3   5  24 1108.51 92.3519   5
  -3   6  25-34.7434 44.2740   5
  -3   6  24 194.408 44.0951  12
  -3   6  20 10336.9 379.042   9
  -3   6  19 1076.78 137.395   9
  -3   6  18 2200.65 197.243   9
  -3   6  18 2018.77 209.526   6
  -3   6  17 1082.28 146.363   9
  -3   6  17 1059.26 150.571   6
  -3   6  16 17540.6 578.299   9
  -3   6  16 18204.8 616.483   6
  -3   6  15 282.764 87.4099   6
  -3   6  15 241.711 74.1164   9
  -3   6  14 4970.43 312.213   9
   3   6 -14 4460.93 463.686   2
  -3   6  14 4874.93 304.885   6
  -3   6  13 257.335 70.4689   6
   3   6 -13 468.676 182.262   2
  -3   6  13 316.276 98.9327   9
   3   6 -13 285.813 67.3657  11
  -3   6  12 18528.4 556.140   6
  -3   6  12 18838.6 592.724   9
   3   6 -12 20807.8 522.507  11
   3   6 -12 19249.4 923.116   2
  -3   6  11 116.946 71.0381   9
   3   6 -11 163.401 128.535   2
   3   6 -10 9731.96 634.875   2
   3   6  -9 426.348 149.327   2
   3   6  -8 3680.38 382.192   2
   3   6  -7 137.030 78.1024   2
   3   6  -6 19449.1 849.739   2
   3   6  -5 240.386 128.988   2
   3   6  -4 5490.11 442.679   2
   3   6  -3 4.06501 105.500   2
   3   6  -2 2332.82 285.626   2
  -3   6   1 385.332 103.329   4
  -3   6   0 29999.0 851.600   2
  -3   6   0 30690.4 845.463   4
  -3   6  -1 779.757 134.381   2
  -3   6  -1 998.864 168.917   4
  -3   6  -2 48166.2 1163.35   2
  -3   6  -3 1161.90 204.878   2
  -3   6  -4 12418.4 629.518   2
  -3   6  -5 1252.61 202.326   2
  -3   6  -6 19497.1 841.943   2
  -3   6  -7 890.524 198.904   2
  -3   6  -8 14657.0 777.122   2
   3   6   9 1292.53 140.647  12
  -3   6  -9 1241.30 232.954   2
   3   6   9 1325.29 179.878   5
   3   6   9 1667.39 169.157   9
   3   6  10 606.066 132.360   5
   3   6  10 758.797 122.692   9
   3   6  10 595.452 100.777  12
  -3   6 -10 639.177 184.055   2
   3   6  11 168.867 93.2628   5
   3   6  11 100.936 65.8302  12
  -3   6 -11-16.3130 62.5320   2
   3   6  11 149.923 57.0313   9
   3   6  12 13006.9 447.867  12
   3   6  12 12438.2 547.124   5
   3   6  12 13459.8 466.865   9
   3   6  13 5280.71 285.882  12
   3   6  13 5810.22 303.498   9
   3   6  14 4211.99 248.256  12
   3   6  14 4089.34 317.223   5
   3   6  14 4452.56 257.476   9
   3   6  15 137.195 74.2982   5
   3   6  16 5106.92 350.973   5
   3   6  17 2018.76 216.265   5
   3   6  18 2055.98 217.763   5
   3   6  19 1091.32 146.127   5
   3   6  20 3153.45 232.713   5
   3   6  21 305.605 76.5298   5
  -3   6 -21 196.884 59.2814  14
  -3   6 -22 1120.36 111.942  14
   3   6  22 1191.43 119.510   5
   3   6  23 813.034 80.4598   5
  -3   6 -23 813.230 77.6111  14
  -3   7  24 1090.91 102.453   5
  -3   7  23 123.951 52.0007   5
  -3   7  23 68.5647 31.1427  12
  -3   7  22 1374.19 148.777   5
  -3   7  22 1280.11 112.746  12
  -3   7  21 12.9671 51.9273   5
  -3   7  21 92.9855 44.2262  12
  -3   7  21 39.2245 31.8509   9
  -3   7  20 2029.34 204.374   5
  -3   7  20 2255.25 165.473   9
  -3   7  19 78.6727 48.0237   9
  -3   7  18 14816.9 488.411   9
  -3   7  17 58.9181 59.1392   9
  -3   7  16 2261.88 214.322   9
  -3   7  15 631.145 115.206   9
  -3   7  14 24770.9 701.629   9
  -3   7  14 24443.5 671.565   6
  -3   7  13 369.360 91.9165   9
  -3   7  13 383.733 95.9835   6
   3   7 -13 400.853 90.0967  11
  -3   7  12 20528.6 582.591   6
  -3   7  12 20633.7 643.996   9
  -3   7  11 218.996 82.5046   9
   3   7 -11 239.323 77.6760  11
   3   7 -10 729.220 112.833  11
  -3   7  10 869.002 139.607   9
   3   7 -10 690.083 199.020   2
  -3   7   9 272.651 75.6979   9
   3   7  -9 258.397 125.974   2
   3   7  -9 349.271 79.0081  11
   3   7  -8 9463.07 386.814  11
  -3   7   8 9469.06 418.982   9
   3   7  -8 9770.72 668.024   2
  -3   7   7 523.612 108.139   9
   3   7  -7 491.283 177.554   2
  -3   7   6 1930.86 179.919   9
   3   7  -6 1754.80 256.206   2
   3   7  -5-45.5423 129.876   2
   3   7  -4 8469.87 591.778   2
   3   7  -3 123.728 83.8954   2
   3   7   3 807.572 120.941   9
   3   7   3 763.856 121.229  12
   3   7   4 9484.35 449.036   5
   3   7   4 9575.50 402.604  12
   3   7   4 9784.57 401.550   9
   3   7   5 694.652 115.594   9
   3   7   5 683.005 120.020  12
   3   7   5 755.484 120.565   5
   3   7   6 4088.19 305.368   5
   3   7   6 4234.85 270.448  12
   3   7   6 4269.80 274.228   9
   3   7   7 401.803 105.484   9
   3   7   7 108.788 48.2662  12
   3   7   7 274.232 95.1096   5
   3   7   8 1232.46 151.968   9
   3   7   8 921.671 127.272  12
   3   7   8 1071.71 175.408   5
   3   7   9 2350.52 244.868   5
   3   7   9 2333.85 208.583  12
   3   7   9 2530.06 218.644   9
  -3   7  -9 2099.86 200.147  14
   3   7  10 6637.22 348.378   9
   3   7  10 6288.79 395.867   5
  -3   7 -10 5977.58 338.385  14
   3   7  10 6162.83 327.862  12
   3   7  11 2098.73 193.113  12
  -3   7 -11 2495.21 227.030  14
   3   7  11 2828.88 226.620   9
   3   7  11 2348.42 241.860   5
  -3   7 -12 10091.0 447.400  14
   3   7  12 9986.28 403.394  12
   3   7  12 10098.2 416.554   9
   3   7  12 9584.76 483.733   5
   3   7  13 875.504 131.661   9
  -3   7 -13 755.338 130.829  14
   3   7  13 982.006 130.092  12
   3   7  13 881.436 156.180   5
   3   7  14 5450.35 359.120   5
   3   7  14 5777.72 289.858  12
  -3   7 -14 5663.28 333.574  14
   3   7  14 5760.77 298.743   9
   3   7  15 842.303 111.855   9
   3   7  15 675.231 138.023   5
   3   7  15 702.522 99.7373  12
  -3   7 -15 888.904 136.782  14
  -3   7 -16 311.871 83.7180  14
   3   7  16 318.274 64.9192   9
   3   7  16 391.520 106.190   5
   3   7  17 298.562 98.5142   5
  -3   7 -17 225.987 73.9723  14
  -3   7 -18 2003.19 172.078  14
   3   7  18 2218.71 201.428   5
  -3   7 -19 202.157 57.5824  14
   3   7  19 273.379 72.1076   5
  -3   7 -20 137.447 47.0483  14
   3   7  20 139.672 50.5327   5
  -3   7 -21 326.438 51.5324  14
   3   7  21 422.863 68.1288   5
  -3   8  22 252.336 41.5243  12
  -3   8  22 235.875 49.7622   5
  -3   8  21 64.8526 38.0269  12
  -3   8  21 65.4913 40.0179   5
  -3   8  21 44.3694 23.9216   9
  -3   8  20 2813.56 174.153  12
  -3   8  20 2935.78 160.290   9
  -3   8  20 2994.70 202.449   5
  -3   8  19 239.292 60.6645   9
  -3   8  19 165.564 68.9179   5
  -3   8  19 162.454 58.4782  12
  -3   8  18 1653.77 159.557  12
  -3   8  18 1383.70 162.363   5
  -3   8  18 1764.86 157.392   9
  -3   8  17 177.694 65.6485   9
  -3   8  17 36.9825 53.9191   5
  -3   8  17 25.2794 54.5427  12
  -3   8  16 2608.99 218.983  12
  -3   8  16 2330.22 226.942   5
  -3   8  16 2763.34 217.073   9
  -3   8  15 229.547 77.6614   9
  -3   8  15 223.865 86.3481  12
  -3   8  15 62.4708 61.3916   5
  -3   8  14 7099.24 370.046   9
  -3   8  14 6948.94 403.894   5
  -3   8  13 88.7011 64.4663   9
  -3   8  13 25.8197 76.5420   5
   3   8 -12 4734.11 260.387  11
  -3   8  12 4262.21 297.316   9
  -3   8  11 149.977 86.1837   9
   3   8 -11 97.6504 60.9890  11
  -3   8  10 41423.2 937.373  12
   3   8 -10 43543.8 835.145  11
  -3   8  10 42028.7 919.168   9
  -3   8   9 167.090 78.9172  12
   3   8  -9 141.782 72.6945  11
  -3   8   9 55.7955 65.5082   9
   3   8  -8 17384.1 552.462  11
  -3   8   8 16881.1 600.975  12
  -3   8   8 17083.7 585.090   9
  -3   8   7 213.643 73.5571   9
   3   8  -7 139.168 91.9215  11
  -3   8   7 46.2885 58.5511  12
  -3   8   6 9405.68 442.009  12
  -3   8   6 8738.20 409.132   9
  -3   8   5 479.373 117.311  12
  -3   8   5 698.878 132.149   9
  -3   8   4 21621.4 650.574  12
  -3   8   4 22217.6 628.684   9
   3   8  -4 22108.9 584.151   9
   3   8  -3 546.933 96.4674   9
  -3   8   3 617.975 121.717  12
   3   8  -3 586.095 107.265   5
  -3   8   3 648.583 117.498   9
  -3   8   2 1486.69 158.662   9
  -3   8   2 1308.00 163.189  12
   3   8  -2 1556.61 170.776   5
   3   8  -2 1312.07 147.847   9
   3   8  -1-162.647 81.5775   5
   3   8  -1-40.7230 59.7634   9
  -3   8   1-9.80166 54.9805  12
   3   8   0 28506.3 753.438   5
  -3   8   0 28923.8 690.638  12
   3   8   0 28022.0 690.192   9
   3   8   1 1068.02 155.245  12
   3   8   1 899.932 131.461   5
   3   8   1 1028.84 142.446   9
   3   8   2 2165.44 203.228   9
   3   8   2 2337.10 216.858  12
   3   8   2 2037.30 213.900   5
   3   8   3 17.9358 76.0162   5
   3   8   3 127.465 66.3254  12
   3   8   3 54.4576 52.6162   9
   3   8   4 11214.0 505.923   5
   3   8   4 11498.1 473.245  12
   3   8   4 11460.7 460.797   9
   3   8   5 1298.27 164.851   9
   3   8   5 1268.19 160.248  12
   3   8   5 1026.13 162.330   5
   3   8   6 7153.66 372.384  12
   3   8   6 7211.54 366.711   9
   3   8   6 7203.63 412.675   5
   3   8   7 899.241 161.580   5
   3   8   7 913.501 133.488  12
   3   8   7 956.590 142.730   9
   3   8   8 1053.23 152.883  12
   3   8   8 1167.92 155.925   9
   3   8   8 927.551 153.071   5
   3   8   9 1331.57 186.626   5
   3   8   9 1324.59 162.059   9
   3   8   9 1121.66 148.880  12
   3   8  10 14057.9 491.449  12
   3   8  10 14738.8 511.841   9
   3   8  10 13751.0 573.009   5
   3   8  11 1961.24 182.754  12
   3   8  11 1699.08 209.141   5
   3   8  11 1961.35 188.938   9
   3   8  12 1900.14 177.777  12
   3   8  12 1857.37 179.790   9
   3   8  12 1947.07 220.739   5
   3   8  13 386.712 84.6020   9
   3   8  13 376.911 100.511   5
   3   8  13 343.956 81.3465  12
   3   8  14 1397.67 136.031   9
   3   8  14 1672.80 191.577   5
  -3   8 -14 1222.77 135.910  14
   3   8  14 1494.09 142.321  12
   3   8  15 386.903 98.3805   5
  -3   8 -15 411.380 80.1977  14
   3   8  15 474.820 75.2868  12
   3   8  15 380.997 73.1592   9
   3   8  16 2424.15 151.541   9
  -3   8 -16 2447.83 164.308  14
   3   8  16 2410.46 201.769   5
  -3   8 -17 283.041 53.4574  14
   3   8  17 520.071 97.1759   5
   3   8  18 47.7033 48.6191   5
   3   8  19 251.894 57.2864   5
  -3   9  19 12.6559 27.9917   9
  -3   9  19 85.7151 36.3794  12
  -3   9  18 445.329 71.4540   9
  -3   9  18 616.544 88.2839  12
  -3   9  17 37.8751 37.9749   9
  -3   9  17 70.9902 49.2717  12
  -3   9  16 365.781 71.3789   9
  -3   9  16 503.752 93.5252  12
  -3   9  15-27.5888 57.5903  12
  -3   9  15 35.2372 52.0235   9
  -3   9  14 3426.63 244.394  12
  -3   9  14 3429.95 234.025   9
  -3   9  13 65.9140 64.1108  12
  -3   9  13 108.752 60.3833   9
  -3   9  12 5975.22 341.654  12
  -3   9  12 6483.91 339.062   9
  -3   9  11 142.843 90.2528  12
   3   9 -11 136.668 63.1246  11
  -3   9  11 151.008 71.8048   9
  -3   9  10 879.425 134.297   9
   3   9 -10 870.772 117.878  11
  -3   9  10 934.219 149.793  12
  -3   9   9 86.3706 64.6434   9
   3   9  -9 34.9515 53.9682  11
  -3   9   9-20.7730 68.3135  12
  -3   9   8 12550.5 518.015  12
   3   9  -8 12824.5 461.252  11
  -3   9   8 12659.1 489.629   9
  -3   9   7 65.9624 67.2625   9
   3   9  -7-22.4263 66.3268  11
  -3   9   7-8.78277 79.9946  12
   3   9  -6 7372.64 368.064  11
  -3   9   6 7601.20 402.790  12
  -3   9   6 7664.98 381.097   9
  -3   9   5 37.8080 51.9083   9
  -3   9   5 76.8602 76.0128  12
   3   9  -5 7.25281 62.6680  11
   3   9  -4 117.351 65.1337   9
  -3   9   4 160.518 71.2830   9
  -3   9   4 129.430 81.5613  12
   3   9  -3 237.066 68.0751   9
  -3   9   3 177.308 70.5129   9
  -3   9   3 93.2689 64.2085  12
   3   9  -2 5731.52 315.895   9
  -3   9   2 6428.24 352.797  12
   3   9  -2 5900.33 315.073   5
  -3   9   2 5688.43 307.033   9
   3   9  -1 116.333 56.4444   5
  -3   9   1 111.052 53.6634  12
   3   9  -1 143.019 66.9057   9
   3   9   0 879.906 137.618   5
   3   9   0 639.669 116.004   9
   3   9   1-107.932 87.0862   5
   3   9   1 3.57284 53.1910   9
   3   9   2 27602.2 750.249   5
   3   9   2 26673.8 699.914   9
   3   9   3 455.358 108.474   9
   3   9   3 420.755 105.373   5
   3   9   4 2349.14 211.202   9
   3   9   4 2121.49 218.455   5
   3   9   5 546.189 120.193  12
   3   9   5 440.712 96.3373   9
   3   9   5 358.985 102.863   5
   3   9   6 4955.30 308.972  12
   3   9   6 4633.35 290.339   9
   3   9   6 4756.84 322.230   5
   3   9   7 243.569 86.6515   9
   3   9   7 155.341 64.2375   5
   3   9   7 245.439 86.8943  12
   3   9   8 6817.87 380.206   5
   3   9   8 7468.96 360.259  12
   3   9   8 7006.66 350.833   9
   3   9   9 446.863 91.2971  12
   3   9   9 511.412 106.024   9
   3   9   9 297.043 87.3027   5
   3   9  10 303.988 84.0025   9
   3   9  10 196.239 62.0108  12
   3   9  10 295.112 96.4397   5
   3   9  11-14.3477 56.9626   5
   3   9  11 11.3154 42.0540  12
   3   9  11 68.2997 62.3163   9
   3   9  12 680.375 115.841   5
   3   9  12 853.571 113.653   9
   3   9  13 41.8640 36.6332   9
   3   9  13-23.8575 53.5730   5
   3   9  14 737.916 111.165   5
   3   9  14 684.163 87.9532   9
   3   9  15 170.156 59.1833   5
   3   9  15 120.593 41.6301   9
   3   9  16 431.254 74.1055   5
   3   9  16 455.274 54.8214   9
   3   9  17 281.784 57.1141   5
  -3  10  16 1583.57 118.773  12
  -3  10  16 1513.98 110.319   9
  -3  10  15 117.519 49.4077  12
  -3  10  15 152.818 48.0999   9
  -3  10  14 163.479 52.7894   9
  -3  10  14 146.161 58.7598  12
  -3  10  13 170.353 66.7797  12
  -3  10  13 174.294 57.6695   9
  -3  10  12 3828.07 223.969   9
  -3  10  12 4118.34 249.460  12
  -3  10  11 44.3854 47.2783   9
  -3  10  11-19.7658 57.1904  12
  -3  10  10 1071.53 141.371  12
   3  10 -10 1008.71 102.190  11
  -3  10  10 1090.95 132.916   9
  -3  10   9 220.787 72.4844   9
  -3  10   9 118.788 67.0186  12
   3  10  -9 293.323 72.1692  11
  -3  10   8 197.280 65.1328   9
  -3  10   8 256.613 81.3722  12
   3  10  -8 182.928 63.4411  11
  -3  10   7 87.6810 59.6741   9
  -3  10   7 110.298 71.2107  12
   3  10  -7 156.555 59.5975  11
  -3  10   6 882.602 123.235   9
   3  10  -6 943.149 128.054  11
  -3  10   6 1217.52 161.671  12
  -3  10   5 97.4281 62.3307   9
   3  10  -5 116.868 74.8452  11
  -3  10   5 32.4470 61.6266  12
   3  10  -4 997.613 134.566  11
  -3  10   4 1012.17 130.024   9
  -3  10   3 197.469 74.2341   9
   3  10  -3 73.5164 63.2710  11
   3  10  -3 124.046 63.4094   9
   3  10  -2 194.202 67.5861   9
   3  10  -1 110.938 66.0651   9
   3  10   0 232.170 75.4237   9
   3  10   1-25.5192 57.3488   5
   3  10   1-76.3605 58.9668   9
   3  10   2 666.128 110.877   5
   3  10   2 654.373 111.936   9
   3  10   3 150.364 65.9229   5
   3  10   3 332.349 87.0308   9
   3  10   4 2925.58 217.359   9
   3  10   4 2766.10 216.853   5
   3  10   5 46.0597 51.2238   9
   3  10   5-35.8330 64.3524   5
   3  10   6 3311.93 222.031   9
   3  10   6 3207.99 227.810   5
   3  10   7 328.885 76.6259   9
   3  10   7 257.997 71.2339   5
   3  10   8 1124.17 135.702   5
   3  10   8 1146.37 130.777   9
   3  10   9 19.5854 40.2122   9
   3  10   9-8.04614 53.5322   5
   3  10  10 1271.47 132.791   5
   3  10  10 1276.40 125.111   9
   3  10  11 61.0934 41.9194   9
   3  10  11 55.5091 44.3572   5
   3  10  12 2203.25 141.337   9
   3  10  12 2166.67 152.363   5
   3  10  13 427.471 67.4251   5
   3  10  13 383.295 59.8058   9
  -3  11  11 163.463 45.6137   9
  -3  11  10 1354.41 115.769   9
  -3  11   9-23.5501 42.5954   9
  -3  11   8 1422.74 124.462   9
   3  11  -8 1204.63 92.7007  11
  -3  11   7 2.11091 33.7706   9
   3  11  -7-0.66028 39.2561  11
  -3  11   6 268.969 63.7029   9
   3  11  -6 296.668 61.6988  11
  -3  11   5 90.8489 44.5948   9
   3  11  -5-30.6923 46.2576  11
   3  11  -4 990.744 112.379  11
   3  11  -3 79.9280 50.6753  11
   3  11  -2 367.506 79.5879  11
   3  11  -1 45.8515 46.5738  11
   3  11  -1-10.9664 43.1331   9
   3  11   0 2500.65 177.986  11
   3  11   0 2500.64 165.366   9
   3  11   1 58.4679 47.4598  11
   3  11   1 112.467 44.4369   9
   3  11   2 1149.46 121.243  11
   3  11   2 1031.42 110.982   9
   3  11   3-23.6442 50.5762  11
   3  11   3 93.1750 49.3405   9
   3  11   4 580.277 86.7535   9
   3  11   5-30.4939 46.4853   9
   3  11   6 48.0389 41.0487   9
   3  11   7 182.382 49.0890   9
   3  11   8 1972.87 130.193   9
   3  11   9 265.082 51.7037   9
   3  11   9 291.620 49.7082  11
   4  -7 -21 209.652 52.4368   8
  -4  -7   9 598.931 171.935   1
  -4  -7   8 2373.69 331.630   1
  -4  -7   6 29680.8 1160.78   1
  -4  -7   5 114.152 84.3962   1
  -4  -7   4 30326.5 1162.38   1
  -4  -7   3 590.207 186.893   1
  -4  -7   2 3512.66 404.749   1
  -4  -7   1 88.2894 97.7247   1
  -4  -7   0 31095.9 1189.38   1
  -4  -7  -1 1202.72 242.091   1
  -4  -7  -2 9509.76 662.543   1
  -4  -7  -3 926.098 200.945   1
  -4  -7  -4 13008.2 763.930   1
  -4  -7  -5 1266.25 232.393   1
  -4  -7  -6 9788.31 651.555   1
  -4  -7  -7 803.156 173.382   1
   4  -6 -25 140.729 42.5300   8
   4  -6 -24 809.456 96.0059   8
   4  -6 -23 183.870 62.2303   8
   4  -6 -22 1656.58 157.227   8
   4  -6 -21 120.867 53.8865   8
   4  -6 -20 1030.65 140.411   8
   4  -6 -19 379.524 79.5736   8
   4  -6 -18 2743.40 221.092   8
  -4  -6   6 39153.7 1231.10   1
  -4  -6   5 1158.51 195.711   1
  -4  -6   4 13615.2 714.259   1
  -4  -6   3 317.123 118.730   1
  -4  -6   2 37317.4 1178.40   1
  -4  -6   1 2706.92 327.325   1
  -4  -6   0 7555.87 540.433   1
  -4  -6  -1 578.064 156.723   1
  -4  -6  -2 24343.1 986.031   1
  -4  -6  -3 2234.14 306.012   1
   4  -6   4 2059.89 237.425   3
  -4  -6  -4 2732.14 337.306   1
   4  -6   5 568.376 140.950   3
  -4  -6  -5 197.266 85.5042   1
  -4  -6  -6 1658.87 267.102   1
   4  -6   6 1371.63 217.461   3
  -4  -6  -7 1109.63 220.559   1
   4  -6   7 545.107 126.312   3
  -4  -6  -8 5722.53 476.776   1
   4  -6   8 6208.92 486.724   3
   4  -6   9 422.401 156.272   3
  -4  -6  -9-115.158 82.0359   1
   4  -6  10 6412.95 521.297   3
  -4  -6 -10 5832.56 479.323   1
  -4  -6 -16 170.289 68.7291   8
  -4  -6 -17 920.666 116.593   8
  -4  -6 -18 2466.42 180.817   8
  -4  -6 -19-25.0197 38.1777   8
  -4  -6 -20 1689.52 129.400   8
  -4  -6 -21 147.667 41.5152   8
   4  -5 -27 869.310 84.8249   8
   4  -5 -26 6777.96 265.074   8
   4  -5 -26 5927.24 212.307   7
   4  -5 -25 242.704 68.1383   8
   4  -5 -25 103.747 39.0864   7
   4  -5 -24 1902.89 173.899   8
   4  -5 -24 1900.73 155.015   7
   4  -5 -23 91.3333 61.7084   8
   4  -5 -23-11.4767 46.8089   7
   4  -5 -22 952.809 139.920   8
   4  -5 -22 952.076 132.641   7
   4  -5 -21 7.51186 51.0817   8
   4  -5 -21 52.8944 41.1472   7
   4  -5 -20 953.045 140.284   8
   4  -5 -20 916.190 133.077   7
   4  -5 -19 534.175 109.967   7
   4  -5 -18 1790.62 183.329   7
   4  -5 -17 136.426 60.6550   7
   4  -5 -16 4492.61 276.015   7
  -4  -5  16 4558.25 415.637   3
  -4  -5  15 867.584 180.131   3
  -4  -5  14 10033.3 591.620   3
  -4  -5  13 243.014 91.0316   3
  -4  -5  12 7763.90 480.631   3
  -4  -5  11 255.706 76.4400   3
  -4  -5  10 13874.2 586.272   3
  -4  -5   9 301.454 95.6269   3
  -4  -5   8 25503.2 711.043   3
  -4  -5   7 716.710 114.161   3
  -4  -5   4 56111.3 1308.75   1
  -4  -5   3 3205.71 315.931   1
   4  -5  -2 43313.2 842.963   3
  -4  -5   2 44428.4 1153.77   1
  -4  -5   1 697.243 153.185   1
   4  -5  -1 461.726 96.7076   3
  -4  -5   0 5868.11 426.518   1
   4  -5   0 5480.57 329.698   3
  -4  -5  -1 400.550 115.178   1
   4  -5   1 396.457 89.9437   3
  -4  -5  -2 442.164 141.153   1
   4  -5   2 464.768 113.549   3
  -4  -5  -3 340.118 105.037   1
   4  -5   3 337.140 97.2344   3
   4  -5   4 726.865 147.362   3
  -4  -5  -4 1111.42 211.979   1
  -4  -5  -5 1481.56 220.388   1
   4  -5   5 1354.78 205.551   3
   4  -5   6 43325.6 1193.73   3
  -4  -5  -6 44740.0 1245.02   1
   4  -5   7 719.556 174.069   3
  -4  -5  -7 670.226 164.720   1
   4  -5   8 4730.80 422.972   3
  -4  -5  -8 5185.17 431.120   1
   4  -5   9 948.628 206.133   3
  -4  -5  -9 1024.32 191.009   1
  -4  -5 -10 9641.26 594.978   1
   4  -5  10 10638.8 665.994   3
   4  -5  11 810.029 190.202   3
  -4  -5 -11 791.117 187.715   1
   4  -5  12 36948.5 1310.99   3
  -4  -5 -12 36048.2 763.243   8
  -4  -5 -12 34596.6 1135.69   1
  -4  -5 -13 4695.26 289.230   8
  -4  -5 -14 4147.50 275.980   8
  -4  -5 -15 3328.00 255.424   8
  -4  -5 -16 10950.6 462.245   8
  -4  -5 -17 2055.97 202.448   8
  -4  -5 -18 1185.43 154.728   8
  -4  -5 -19 25.5379 49.5808   8
  -4  -5 -20 2656.54 206.433   8
  -4  -5 -21 204.179 65.4933   8
  -4  -5 -22 2329.00 160.571   8
  -4  -5 -23 788.359 82.8071   8
   4  -4 -28 3360.19 166.427   8
   4  -4 -28 2781.71 134.678   7
   4  -4 -27 52.1493 33.7054   8
   4  -4 -27 6.70585 35.2943   7
   4  -4 -26 794.513 106.650   8
   4  -4 -26 580.969 89.3383   7
   4  -4 -25 378.252 89.9501   8
   4  -4 -25 348.316 78.5797   7
   4  -4 -24 1757.66 181.039   8
   4  -4 -24 1711.59 173.991   7
   4  -4 -23 247.363 83.9156   8
   4  -4 -23 231.431 75.8259   7
   4  -4 -22 6977.56 368.216   7
   4  -4 -22 6559.73 367.485   8
   4  -4 -21 707.823 123.040   7
   4  -4 -21 876.154 140.984   8
   4  -4 -20 1072.95 156.105   7
   4  -4 -19 227.188 70.6869   7
   4  -4 -18 3928.29 278.045   7
  -4  -4  18 4182.52 406.811   3
  -4  -4  17 137.980 73.6565   3
   4  -4 -17 87.6195 62.6378   7
  -4  -4  16 3497.13 374.405   3
  -4  -4  15 464.720 125.510   3
  -4  -4  14 7728.58 515.115   3
  -4  -4  13 465.080 131.320   3
  -4  -4  12 17920.6 723.906   3
  -4  -4  11 421.135 110.724   3
  -4  -4  10 1512.80 194.143   3
  -4  -4   9 72.4849 67.4721   3
  -4  -4   8 73919.1 1192.57   3
  -4  -4   7 198.387 79.0366   3
  -4  -4   6 32864.7 701.740   3
  -4  -4   5 978.682 118.238   3
   4  -4  -4 2546.14 157.203   1
  -4  -4   4 2392.15 166.439   3
   4  -4  -3 331.747 55.2132   1
  -4  -4   3 368.037 114.879   1
  -4  -4   3 486.651 73.2280   3
  -4  -4   2 63330.8 1223.70   1
   4  -4  -2 65860.6 842.132   1
   4  -4  -1 1972.62 153.794   1
  -4  -4   1 2057.80 221.590   1
  -4  -4   0 60386.9 1214.89   1
  -4  -4  -1 2239.95 244.625   1
  -4  -4  -2 1149.13 174.878   1
   4  -4   2 961.131 156.825   3
   4  -4   3 1869.35 207.738   3
  -4  -4  -3 2070.44 242.161   1
   4  -4   4 59448.0 1226.73   3
  -4  -4  -4 59973.0 1305.19   1
  -4  -4  -5 7961.88 481.408   1
   4  -4   5 7617.69 462.369   3
   4  -4   6 12396.2 609.665   3
  -4  -4  -6 12716.7 609.877   1
  -4  -4  -7 889.685 164.973   1
   4  -4   7 913.438 182.590   3
  -4  -4  -8 27704.5 918.475   1
   4  -4   8 27898.5 984.978   3
  -4  -4  -9 276.473 117.063   1
   4  -4   9 218.054 117.110   3
  -4  -4 -10 10264.1 579.995   1
   4  -4  10 10555.9 650.184   3
   4  -4  11 5134.35 464.082   3
  -4  -4 -11 5073.64 416.140   1
   4  -4  12 3252.07 391.689   3
  -4  -4 -12 3150.21 338.645   1
  -4  -4 -13 2403.76 289.963   1
  -4  -4 -13 2476.94 217.801   8
   4  -4  13 2076.27 313.167   3
  -4  -4 -14 27897.4 1026.07   1
   4  -4  14 27916.5 1164.48   3
  -4  -4 -14 27637.6 735.328   8
  -4  -4 -15 9499.77 442.351   8
  -4  -4 -16 643.696 123.703   8
  -4  -4 -17 3929.09 294.295   8
  -4  -4 -18 2632.26 239.647   8
  -4  -4 -19 779.585 135.278   8
  -4  -4 -20 572.927 113.088   8
  -4  -4 -21 174.380 69.7444   8
  -4  -4 -22 307.681 76.4481   8
  -4  -4 -23 67.1366 48.8959   8
  -4  -4 -24 1421.05 117.391   8
   4  -3 -28 87.8423 35.5574   8
   4  -3 -28 138.184 46.7486   7
   4  -3 -27 96.1109 49.8514   8
   4  -3 -27 109.557 51.2435   7
   4  -3 -26 2104.99 185.432   8
   4  -3 -26 1950.67 179.371   7
   4  -3 -25 99.2967 59.9615   8
   4  -3 -25 125.090 66.3678   7
   4  -3 -24 3451.18 264.426   8
   4  -3 -24 3626.55 268.660   7
   4  -3 -23 195.041 77.9708   7
   4  -3 -23 175.641 72.9629   8
   4  -3 -22 1054.14 158.192   8
   4  -3 -22 986.829 154.332   7
   4  -3 -21 771.352 137.895   7
   4  -3 -20 13282.0 530.482   7
  -4  -3  19 803.726 181.802   3
   4  -3 -19 534.829 115.554   7
  -4  -3  18 16573.6 820.497   3
   4  -3 -18 16561.1 565.843   7
  -4  -3  17 383.907 145.535   3
  -4  -3  16 80.1236 77.4231   3
  -4  -3  15 147.393 73.9314   3
  -4  -3  14 15183.6 702.967   3
  -4  -3  13 568.020 133.504   3
   4  -3 -12 21603.9 535.872   1
  -4  -3  12 23538.1 801.247   3
  -4  -3  11 495.444 113.340   3
   4  -3 -11 595.623 89.1238   1
   4  -3 -10 96675.1 985.295   1
  -4  -3  10 97610.4 1479.06   3
  -4  -3   9 714.850 129.216   3
   4  -3  -9 832.328 88.4920   1
   4  -3  -8 3365.47 158.364   1
  -4  -3   8 3311.33 249.542   3
   4  -3  -7 51.8725 23.9089   1
  -4  -3   7 100.350 46.1935   3
   4  -3  -6 57707.1 555.862   1
  -4  -3   6 56020.8 889.933   3
   4  -3  -5 2502.28 110.852   1
  -4  -3   5 2107.30 164.119   3
  -4  -3   4 18662.5 445.566   3
   4  -3  -4 19886.7 315.617   1
   4  -3  -3 94.9898 31.7361   1
  -4  -3   3 47.6607 30.8189   3
  -4  -3   2 7632.51 372.576   1
   4  -3  -2 7498.78 218.078   1
  -4  -3   1 1887.51 192.249   1
  -4  -3   0 96231.2 826.184   4
  -4  -3   0 97410.2 1361.06   1
  -4  -3  -1 2750.70 244.790   1
  -4  -3  -1 2925.55 131.660   4
  -4  -3  -2 198287. 945.323   4
  -4  -3  -2 191794. 2003.19   1
  -4  -3  -3 7247.30 408.035   1
  -4  -3  -4 89106.8 1423.06   1
   4  -3   4 88521.0 1410.12   3
  -4  -3  -5 1127.38 172.542   1
   4  -3   5 974.269 161.022   3
   4  -3   6 45148.0 1095.66   3
  -4  -3  -6 44000.3 1035.09   1
  -4  -3  -7 2256.63 241.043   1
   4  -3   7 1682.06 230.747   3
   4  -3   8 15278.4 692.212   3
  -4  -3  -8 15418.2 636.175   1
   4  -3   9 246.280 60.8707   3
  -4  -3  -9 629.123 140.543   1
   4  -3  10 18127.4 814.300   3
  -4  -3 -10 18053.5 721.961   1
   4  -3  11-34.9000 57.7900   3
  -4  -3 -11 79.7742 99.0640   1
   4  -3  12 27835.7 1083.84   3
  -4  -3 -12 26868.6 935.925   1
   4  -3  13 159.054 101.677   3
  -4  -3 -13 323.775 83.8263   1
  -4  -3 -14 972.402 143.531   8
  -4  -3 -14 1093.93 218.719   1
   4  -3  14 492.633 133.921   3
  -4  -3 -15 493.521 145.380   1
  -4  -3 -15 383.475 84.8347   7
  -4  -3 -15 680.393 127.904   8
  -4  -3 -16 7971.62 419.748   8
  -4  -3 -16 7641.02 383.769   7
  -4  -3 -17 208.848 73.0266   7
  -4  -3 -17 260.896 88.5684   8
  -4  -3 -18 1303.78 162.194   7
  -4  -3 -18 1252.74 172.087   8
  -4  -3 -19 589.822 109.520   7
  -4  -3 -19 720.150 139.527   8
  -4  -3 -20 1845.80 206.157   8
  -4  -3 -20 1608.98 179.808   7
  -4  -3 -21 579.785 106.594   7
  -4  -3 -21 564.781 114.175   8
  -4  -3 -22 2171.34 199.646   8
  -4  -3 -22 1772.66 165.917   7
  -4  -3 -23 220.160 71.8632   8
  -4  -3 -23 178.094 50.1936   7
  -4  -3 -24 373.976 75.2144   8
  -4  -3 -24 313.412 54.8186   7
  -4  -3 -25 653.407 80.3565   8
   4  -2 -29 169.001 44.6264   8
   4  -2 -29 181.870 49.1630   7
   4  -2 -28 879.227 110.994   7
   4  -2 -28 996.952 110.506   8
   4  -2 -27 243.076 65.6152   7
   4  -2 -27 268.617 69.9720   8
   4  -2 -26 1711.26 171.541   8
   4  -2 -26 1556.63 171.120   7
   4  -2 -25 104.539 63.7424   8
   4  -2 -25 19.9837 49.6607   7
   4  -2 -24 2370.86 223.787   8
   4  -2 -24 2336.01 226.534   7
   4  -2 -23 100.995 66.0542   8
   4  -2 -23 40.5628 60.2434   7
   4  -2 -22 10604.7 480.044   8
   4  -2 -22 10337.7 482.113   7
   4  -2 -21 294.070 92.0498   7
   4  -2 -20 6576.14 377.880   7
  -4  -2  19 611.532 147.576   3
   4  -2 -19 835.328 136.711   7
  -4  -2  18 3675.50 389.407   3
   4  -2 -18 3664.97 265.261   7
  -4  -2  17 425.953 141.954   3
  -4  -2  16 21892.0 877.181   3
  -4  -2  15 1005.30 189.226   3
  -4  -2  14 17612.1 731.078   3
  -4  -2  13 460.106 113.157   3
   4  -2 -12 18964.9 476.699   2
   4  -2 -12 18564.2 507.988   1
  -4  -2  12 18974.3 692.287   3
   4  -2 -11 1276.17 116.384   2
  -4  -2  11 1182.73 171.446   3
   4  -2 -11 1158.53 119.545   1
   4  -2 -10 7481.10 250.847   2
   4  -2 -10 7210.05 268.244   1
  -4  -2  10 7370.04 389.775   3
   4  -2  -9 2355.57 138.630   1
  -4  -2   9 2073.71 203.366   3
   4  -2  -9 2191.77 120.717   2
   4  -2  -8 26628.9 414.497   1
  -4  -2   8 25810.0 657.203   3
   4  -2  -8 27072.5 365.829   2
   4  -2  -7 971.510 70.2224   1
   4  -2  -7 992.641 59.6288   2
  -4  -2   7 895.508 117.907   3
   4  -2  -6 12565.2 210.913   1
  -4  -2   6 12234.6 400.441   3
  -4  -2   5 1249.67 123.972   3
   4  -2  -5 1218.75 51.4844   1
  -4  -2   4 4574.39 216.927   3
  -4  -2   3 1606.29 121.465   3
   4  -2  -2 20637.0 197.740   1
  -4  -2   2 25610.4 584.401   1
  -4  -2   1 143.446 63.1328   1
  -4  -2   1 222.458 43.9864   4
  -4  -2   0 51672.5 590.510   4
  -4  -2   0 52376.2 864.106   1
  -4  -2  -1 3916.28 160.957   4
  -4  -2  -1 3801.93 246.817   1
  -4  -2  -2 237916. 1991.76   1
  -4  -2  -2 246221. 1194.11   4
  -4  -2  -3 249.742 40.6327   4
  -4  -2  -3 202.934 78.5514   1
  -4  -2  -4 58309.5 535.930   4
  -4  -2  -4 57624.0 1021.36   1
  -4  -2  -5 2088.49 100.635   4
   4  -2   5 2010.37 212.775   3
  -4  -2  -5 2141.05 207.063   1
  -4  -2  -6 6502.85 363.198   1
   4  -2   6 6080.11 376.297   3
  -4  -2  -7 333.609 88.7299   1
   4  -2   7 444.181 118.369   3
  -4  -2  -8 61789.2 1180.41   1
   4  -2   8 62800.2 1320.62   3
   4  -2   9 6443.76 440.066   3
  -4  -2  -9 7358.08 425.439   1
   4  -2  10 2480.14 290.482   3
  -4  -2 -10 2998.96 284.521   1
   4  -2  11 1450.04 235.412   3
  -4  -2 -11 1471.92 208.273   1
   4  -2  12 8172.32 562.659   3
  -4  -2 -12 8051.96 502.933   1
  -4  -2 -13 1191.53 204.317   1
   4  -2  13 931.515 188.438   3
   4  -2  14 7293.99 565.703   3
  -4  -2 -14 6785.83 493.281   1
  -4  -2 -15 1124.00 210.097   1
  -4  -2 -15 702.641 155.818   2
  -4  -2 -15 714.823 124.690   8
  -4  -2 -15 925.883 145.303   7
   4  -2  15 697.049 197.945   3
  -4  -2 -16 1091.91 162.948   8
  -4  -2 -16 1197.25 225.566   1
   4  -2  16 760.614 220.425   3
  -4  -2 -16 1275.67 228.525   2
  -4  -2 -16 1006.48 148.956   7
  -4  -2 -17 192.477 71.3769   8
  -4  -2 -17 55.0345 49.6208   7
  -4  -2 -18 6712.05 393.644   8
  -4  -2 -18 6506.55 377.987   7
  -4  -2 -19-83.6046 81.9838   8
  -4  -2 -19 139.688 82.5500   7
  -4  -2 -20 2953.66 259.454   8
  -4  -2 -20 2872.46 247.771   7
  -4  -2 -21 111.087 67.6334   7
  -4  -2 -21 101.556 73.1315   8
  -4  -2 -22 403.786 95.2621   7
  -4  -2 -22 348.483 99.5761   8
  -4  -2 -23 119.790 67.6064   8
  -4  -2 -23 137.571 58.5352   7
  -4  -2 -24 685.324 97.6108   7
  -4  -2 -24 786.011 113.336   8
  -4  -2 -25 737.016 86.2246   7
  -4  -2 -25 707.256 92.4896   8
   4  -1 -29-26.7281 31.7125   8
   4  -1 -29 40.2307 33.0132   7
   4  -1 -28 1717.93 155.017   7
   4  -1 -28 1558.41 134.290   8
   4  -1 -27 660.365 102.482   8
   4  -1 -27 567.018 102.119   7
   4  -1 -26 1966.55 180.883   8
   4  -1 -26 1872.71 188.968   7
   4  -1 -25 147.569 58.7648   8
   4  -1 -25 240.163 94.6279   7
   4  -1 -24 12577.1 502.124   8
   4  -1 -24 13884.8 546.123   7
   4  -1 -23 1181.97 165.219   7
   4  -1 -23 998.262 155.359   8
   4  -1 -22 5011.68 327.283   8
   4  -1 -22 5632.81 359.914   7
   4  -1 -21 1617.16 195.676   7
  -4  -1  20 11783.8 691.380   3
   4  -1 -20 11455.1 494.720   7
   4  -1 -19 727.987 127.885   7
  -4  -1  19 486.235 145.014   3
  -4  -1  18 7940.07 547.768   3
  -4  -1  17 2104.53 278.827   3
   4  -1 -16 27703.2 777.524   2
  -4  -1  16 27782.0 955.840   3
  -4  -1  15-35.5000 51.0759   3
   4  -1 -15 146.807 80.8641   2
   4  -1 -14 42304.2 860.825   2
  -4  -1  14 40368.3 1060.26   3
  -4  -1  13 435.774 122.390   3
   4  -1 -13 258.105 74.3163   2
  -4  -1  12 46920.0 1036.48   3
   4  -1 -12 48691.7 806.579   2
  -4  -1  11 2406.26 224.042   3
   4  -1 -11 2309.88 165.302   2
   4  -1 -10 47013.7 673.811   2
  -4  -1  10 45180.9 917.762   3
   4  -1  -9 1083.63 95.2750   2
  -4  -1   9 910.502 137.615   3
  -4  -1   8 17331.0 522.040   3
   4  -1  -8 18916.4 348.181   2
   4  -1  -7 920.867 68.6273   2
  -4  -1   7 794.918 113.576   3
   4  -1  -6 10415.8 182.170   2
  -4  -1   6 10199.7 357.707   3
  -4  -1   5 3348.40 194.702   3
  -4  -1   4 89423.7 931.940   3
  -4  -1   3 4656.70 204.861   3
  -4  -1   2 7161.33 238.847   4
  -4  -1   2 6745.79 243.530   1
  -4  -1   1 2520.46 137.848   4
  -4  -1   1 2552.23 154.309   1
  -4  -1   0 72005.9 741.433   4
  -4  -1   0 68602.8 833.572   1
  -4  -1  -1 16823.7 351.901   4
  -4  -1  -1 17365.6 440.169   1
  -4  -1  -2 171506. 1146.90   4
  -4  -1  -2 167664. 1422.42   1
  -4  -1  -3 679.540 98.9337   1
  -4  -1  -3 530.600 70.1328   4
  -4  -1  -4 38595.0 561.714   4
  -4  -1  -4 38485.2 735.842   1
  -4  -1  -5 185.968 74.8177   1
   4  -1   5 152.984 63.7670   3
  -4  -1  -5 140.529 35.8974   4
  -4  -1  -6 86043.6 914.910   4
  -4  -1  -6 82400.9 1177.26   1
   4  -1   6 84879.7 1326.78   3
  -4  -1  -7 8446.21 392.072   1
  -4  -1  -7 7837.64 286.560   4
  -4  -1  -8 4793.27 320.626   1
   4  -1   8 5120.51 359.715   3
  -4  -1  -9 5702.17 360.060   1
   4  -1   9 5081.67 377.199   3
  -4  -1 -10 27626.8 827.920   1
   4  -1  10 27601.4 912.949   3
   4  -1  11 329.700 106.969   3
  -4  -1 -11 362.216 104.487   1
   4  -1  12 8584.00 546.950   3
  -4  -1 -12 9164.21 523.070   1
   4  -1  13 5581.51 459.958   3
  -4  -1 -13 6733.13 471.977   1
   4  -1  14 5031.18 447.146   3
  -4  -1 -14 4867.17 418.990   1
  -4  -1 -14 4849.48 429.568   2
   4  -1  15 2885.80 348.082   3
  -4  -1 -15 2627.88 228.513   8
  -4  -1 -15 2807.90 233.891   7
  -4  -1 -15 2455.93 301.787   1
  -4  -1 -15 3158.55 355.105   2
  -4  -1 -16 26502.3 736.115   8
   4  -1  16 24137.9 1018.41   3
  -4  -1 -16 26406.4 1052.32   2
  -4  -1 -16 26078.2 1023.17   1
  -4  -1 -16 25540.6 731.630   7
   4  -1  17 2204.69 306.709   3
  -4  -1 -17 2134.74 220.968   8
  -4  -1 -17 2251.85 229.552   7
  -4  -1 -18 1210.82 174.950   8
  -4  -1 -18 1228.19 174.359   7
  -4  -1 -19 580.535 118.441   8
  -4  -1 -19 558.808 125.379   7
  -4  -1 -20 6506.66 383.854   8
  -4  -1 -20 6070.28 374.461   7
  -4  -1 -21 699.143 134.098   8
  -4  -1 -21 667.857 130.358   7
  -4  -1 -22 2078.92 206.113   8
  -4  -1 -22 2137.92 213.601   7
  -4  -1 -23 56.7352 48.1953   8
  -4  -1 -23 110.678 64.7350   7
  -4  -1 -24 46.5641 42.9200   8
  -4  -1 -24 176.512 65.3577   7
  -4  -1 -25 35.8540 37.1960   8
  -4  -1 -25 117.029 49.5335   7
  -4  -1 -26 583.025 66.9539   8
  -4  -1 -26 627.471 74.4255   7
   4   0 -29 107.459 44.3203   7
   4   0 -28 1795.13 133.963   8
   4   0 -28 1983.26 167.088   7
   4   0 -27-43.0481 44.2187   8
   4   0 -27-22.2541 45.8128   7
   4   0 -26 6003.73 298.558   8
   4   0 -26 6587.39 350.114   7
   4   0 -25 1448.58 159.737   8
   4   0 -25 1511.61 181.167   7
   4   0 -24 10446.1 436.507   8
   4   0 -24 10928.4 482.789   7
   4   0 -23 163.306 71.0470   8
   4   0 -23 103.735 75.4523   7
   4   0 -22 12748.2 530.519   7
   4   0 -22 12296.7 488.056   8
   4   0 -21 1219.19 158.387   8
   4   0 -21 1394.29 180.304   7
  -4   0  20 885.006 199.373   3
   4   0 -20 1017.18 163.377   7
  -4   0  19 151.960 96.2701   3
   4   0 -19 278.641 89.6944   7
   4   0 -18 5796.44 405.221   2
  -4   0  18 5919.57 470.610   3
   4   0 -17 2829.25 276.314   2
  -4   0  17 3114.43 324.531   3
  -4   0  16 4465.42 374.779   3
   4   0 -16 4676.80 339.440   2
   4   0 -15 40.3318 36.8535   2
  -4   0  15 38.1797 69.6524   3
   4   0 -14 2250.94 214.777   2
  -4   0  14 2030.27 231.797   3
  -4   0  13 54.9850 44.1879   3
   4   0 -13 55.1086 43.7499   2
   4   0 -12 52022.5 909.582   2
  -4   0  12 52695.7 1063.71   3
  -4   0  11 86.0902 52.4816   3
   4   0 -11 168.811 55.9637   2
   4   0 -10 2792.96 186.175   2
  -4   0  10 2757.41 225.569   3
  -4   0   9 4365.61 263.134   3
   4   0  -9 4491.87 216.414   2
   4   0  -8 41112.2 608.267   2
  -4   0   8 40923.1 766.471   3
  -4   0   7-1.71880 28.2447   3
   4   0  -7-10.6563 21.9689   2
   4   0  -6 56086.1 597.873   2
  -4   0   6 56667.7 814.895   3
  -4   0   5 3764.03 193.394   4
   4   0  -5 3492.02 137.807   2
  -4   0   5 3735.00 200.256   3
   4   0  -4 153661. 840.835   2
  -4   0   4 155145. 1231.97   3
  -4   0   4 156933. 1195.57   4
  -4   0   3 664.709 79.0111   4
  -4   0   3 620.868 52.3884   1
   4   0  -3 614.024 52.8238   2
  -4   0   2 188333. 1274.29   4
  -4   0   2 181366. 912.820   1
  -4   0   1 15282.4 364.442   4
  -4   0   1 15225.1 286.527   1
  -4   0   0 3209.48 167.730   4
  -4   0   0 3157.23 142.046   1
  -4   0  -1 2535.95 159.226   4
  -4   0  -1 2856.50 148.393   1
  -4   0  -2 1190.68 110.396   4
  -4   0  -2 287.930 63.7962   1
  -4   0  -3 1626.22 133.613   1
  -4   0  -3 1725.91 137.446   4
  -4   0  -4 6955.25 294.101   1
  -4   0  -4 7549.52 291.310   4
  -4   0  -5 120.349 56.2201   4
  -4   0  -5 78.9956 49.6125   1
  -4   0  -6 16227.7 507.103   1
  -4   0  -6 16673.0 470.887   4
   4   0   6 16406.3 544.754   3
  -4   0  -7 4825.41 267.047   4
   4   0   7 4861.34 315.357   3
  -4   0  -7 5306.27 313.062   1
  -4   0  -8 56670.4 941.065   4
  -4   0  -8 59073.3 1088.91   1
   4   0   8 56312.7 1108.08   3
   4   0   9 1229.92 178.931   3
  -4   0  -9 1242.86 154.385   4
  -4   0  -9 1543.15 193.884   1
   4   0  10 21274.5 750.787   3
  -4   0 -10 21324.4 725.748   1
  -4   0 -11 18234.2 725.622   2
   4   0  11 16327.6 689.902   3
  -4   0 -11 18601.6 720.330   1
   4   0  12 2095.09 271.140   3
  -4   0 -12 1881.29 235.103   1
  -4   0 -12 1785.89 240.744   2
  -4   0 -13 4416.24 392.956   1
   4   0  13 3988.81 368.991   3
  -4   0 -13 3799.23 362.223   2
  -4   0 -14 25704.8 986.410   2
   4   0  14 26238.3 962.208   3
  -4   0 -14 26444.4 981.065   1
  -4   0 -15 6282.71 355.536   7
  -4   0 -15 6462.70 515.564   2
   4   0  15 6363.46 490.382   3
  -4   0 -16 23.4271 59.1677   8
  -4   0 -16 42.0078 76.0957   7
   4   0  16 434.500 144.636   3
  -4   0 -16 353.850 108.416   2
  -4   0 -17 2959.83 359.384   2
  -4   0 -17 2655.24 239.334   8
  -4   0 -17 2452.53 239.177   7
  -4   0 -18 16583.6 601.453   8
  -4   0 -18 16280.0 624.374   7
  -4   0 -19 185.071 78.3521   7
  -4   0 -19 105.936 53.9999   8
  -4   0 -20 6692.80 379.922   8
  -4   0 -20 6886.80 406.559   7
  -4   0 -21 3791.00 278.053   8
  -4   0 -21 3250.46 274.562   7
  -4   0 -22 1339.21 181.269   7
  -4   0 -22 1516.76 175.578   8
  -4   0 -23 418.714 97.9832   7
  -4   0 -23 571.165 104.658   8
  -4   0 -24 1913.15 164.420   8
  -4   0 -24 1962.65 180.701   7
  -4   0 -25 547.516 77.4104   8
  -4   0 -25 643.849 99.5181   7
  -4   0 -26-4.01217 28.4541   7
  -4   0 -26 8.14843 23.4487   8
   4   1 -29 32.2432 30.2218   7
   4   1 -28 1316.58 129.804   7
   4   1 -27 580.591 102.521   7
   4   1 -26 2161.42 162.467   8
   4   1 -26 2377.22 208.007   7
   4   1 -25 71.3702 51.9851   8
   4   1 -25 210.847 78.8723   7
   4   1 -24 13294.4 459.921   8
   4   1 -24 13370.6 524.138   7
   4   1 -23 1149.25 142.218   8
  -4   1  23 1112.19 146.058   6
   4   1 -23 1025.62 153.641   7
  -4   1  22 5661.57 322.187   6
   4   1 -22 5125.95 300.606   8
   4   1 -22 5421.11 342.229   7
  -4   1  22 5382.08 292.716  10
   4   1 -21 1530.00 184.662   7
   4   1 -21 1618.83 174.398   8
  -4   1  21 1723.13 182.823   6
  -4   1  21 1570.46 165.939  10
   4   1 -20 10779.8 421.831   8
   4   1 -20 10007.9 592.861   2
   4   1 -20 11241.9 473.250   7
  -4   1  20 11349.0 450.623   6
  -4   1  20 10896.2 412.008  10
  -4   1  20 11604.5 632.020   3
  -4   1  19 647.675 119.392   3
   4   1 -19 752.329 124.293   7
  -4   1  19 569.532 105.359   6
  -4   1  19 705.320 117.583  10
   4   1 -19 306.652 106.501   2
   4   1 -18 6623.82 460.197   2
  -4   1  18 7123.40 476.098   3
   4   1 -17 2082.83 250.118   2
  -4   1  17 1834.26 239.667   3
  -4   1  16 26855.0 873.194   3
  -4   1  16 27545.8 751.933   4
   4   1 -16 25815.2 843.726   2
  -4   1  15-40.5869 58.5549   4
  -4   1  15-14.1687 70.0665   3
   4   1 -15 16.9348 54.6426   2
  -4   1  14 41592.8 880.263   4
  -4   1  14 42457.7 1011.91   3
   4   1 -14 41164.5 970.687   2
  -4   1  13 373.118 100.408   3
  -4   1  13 283.211 79.3378   4
   4   1 -13 414.597 100.570   2
  -4   1  12 46125.2 857.261   4
   4   1 -12 45516.9 929.032   2
  -4   1  12 46919.7 981.422   3
  -4   1  11 2392.49 192.582   4
  -4   1  11 2027.73 193.972   3
   4   1 -11 2310.30 202.665   2
  -4   1  10 42449.0 840.437   3
   4   1 -10 42514.2 810.943   2
  -4   1  10 41441.8 763.566   4
  -4   1   9 985.289 118.118   4
   4   1  -9 911.165 116.122   2
  -4   1   9 1018.19 127.925   3
   4   1  -8 17666.0 473.624   2
  -4   1   8 17514.9 459.006   4
  -4   1   8 17681.5 492.766   3
  -4   1   7 939.450 109.676   4
   4   1  -7 976.312 106.181   2
  -4   1   7 921.835 114.595   3
  -4   1   6 9536.27 319.059   4
   4   1  -6 8880.16 301.471   2
  -4   1   6 9404.00 326.543   3
  -4   1   5 3479.13 192.671   4
   4   1  -5 3425.41 181.679   2
  -4   1   4 91852.1 978.567   4
   4   1  -4 89786.8 884.524   2
  -4   1   3 4964.36 226.020   4
   4   1  -3 4821.08 206.173   2
  -4   1   2 8163.82 289.590   4
   4   1  -2 8208.85 263.621   2
  -4   1   1 2296.98 162.724   4
  -4   1   0 66422.3 871.214   4
  -4   1   0 67624.1 521.344   1
  -4   1  -1 19155.6 335.494   1
  -4   1  -1 17302.3 452.348   4
  -4   1  -2 169318. 1145.44   1
  -4   1  -2 165519. 1441.78   4
  -4   1  -3 464.905 82.4001   4
  -4   1  -3 598.165 82.2137   1
  -4   1  -4 37761.3 735.616   4
  -4   1  -4 36536.2 658.582   1
  -4   1  -5 259.210 69.1675   1
  -4   1  -5 232.684 66.1241   4
   4   1   5 258.675 66.5093   3
  -4   1  -6 87279.2 1217.77   2
  -4   1  -6 88753.7 1233.94   4
   4   1   6 87356.9 1165.00   3
  -4   1  -6 89296.8 1204.18   1
  -4   1  -7 8253.06 398.811   2
   4   1   7 7253.81 353.995   3
  -4   1  -7 8695.35 406.270   1
  -4   1  -7 7143.38 364.095   4
  -4   1  -8 4556.12 305.636   4
  -4   1  -8 4911.91 328.853   2
  -4   1  -8 4783.47 322.550   1
   4   1   8 4441.44 297.120   3
  -4   1  -9 5012.69 325.954   4
  -4   1  -9 6104.20 381.507   1
  -4   1  -9 5040.73 351.671   2
   4   1  10 25252.6 766.744   3
  -4   1 -10 27162.8 865.889   2
  -4   1 -10 26154.2 838.815   1
   4   1  11 260.791 92.6991   3
  -4   1 -11 458.077 123.156   2
  -4   1 -12 8576.29 540.162   2
   4   1  12 8284.34 474.785   3
  -4   1 -13 5583.61 459.510   2
   4   1  13 5713.85 404.674   3
  -4   1 -14 5165.90 461.086   2
   4   1  14 4635.24 382.981   3
  -4   1 -15 2474.78 328.004   2
  -4   1 -15 2687.90 238.775   7
  -4   1 -16 24924.1 693.245   8
  -4   1 -16 25659.1 1087.03   2
  -4   1 -16 24595.9 737.926   7
  -4   1 -17 2185.46 212.692   8
  -4   1 -17 2188.07 232.912   7
  -4   1 -18 1119.02 172.129   7
  -4   1 -18 727.408 125.830   8
  -4   1 -19 796.761 132.374   8
  -4   1 -19 835.580 152.802   7
  -4   1 -20 6383.00 361.778   8
  -4   1 -20 7081.65 416.226   7
  -4   1 -21 936.029 139.565   8
  -4   1 -21 723.656 135.977   7
  -4   1 -22 1834.17 175.446   8
  -4   1 -22 2646.72 242.416   7
  -4   1 -23 108.703 48.0616   8
  -4   1 -23 181.162 73.0260   7
  -4   1 -24 133.349 51.4954   8
  -4   1 -24 161.693 67.4582   7
  -4   1 -25 93.2674 29.8444   8
  -4   1 -25 87.0452 49.9424   7
  -4   1 -26 574.866 73.5125   7
   4   2 -29 29.1974 23.3720   7
   4   2 -28 925.824 99.9011   7
   4   2 -27 137.945 42.1912   7
   4   2 -26 1740.93 164.787   7
   4   2 -25-42.2113 56.1423   7
   4   2 -24 1919.50 194.335   7
   4   2 -23 24.8478 53.3508   7
  -4   2  23 125.586 70.2612   6
  -4   2  22 9995.82 410.997  10
   4   2 -22 9900.12 449.209   7
  -4   2  22 9720.42 450.106   6
   4   2 -21 202.716 73.9245   7
  -4   2  21 334.834 82.1082  10
  -4   2  21 366.195 91.0240   6
  -4   2  20 5921.00 347.459   6
  -4   2  20 5113.60 302.838  10
   4   2 -20 4815.29 435.112   2
   4   2 -20 5263.84 319.828   7
   4   2 -19 980.812 138.997   7
  -4   2  19 844.185 132.949   6
  -4   2  19 794.681 128.151  10
   4   2 -19 682.840 159.271   2
   4   2 -18 3551.22 358.788   2
  -4   2  18 4269.01 283.678   6
  -4   2  17 421.597 108.260   3
   4   2 -17 491.305 146.027   2
  -4   2  16 20885.8 735.092   3
   4   2 -16 20470.3 807.944   2
  -4   2  15 599.279 109.475   3
   4   2 -15 776.320 162.488   2
   4   2 -14 16486.0 672.498   2
  -4   2  14 18216.1 644.122   3
  -4   2  13 845.981 138.039   3
  -4   2  13 445.985 80.4456   4
   4   2 -13 712.892 134.792   2
  -4   2  12 17399.7 524.980   4
   4   2 -12 16817.1 627.010   2
  -4   2  12 17377.4 580.059   3
  -4   2  11 1222.13 138.308   4
   4   2 -11 1247.40 165.283   2
  -4   2  11 959.980 136.776   3
  -4   2  10 7943.03 342.075   4
   4   2 -10 7700.22 392.032   2
  -4   2  10 7830.48 355.725   3
  -4   2   9 2142.40 182.045   3
  -4   2   9 2039.70 170.481   4
   4   2  -9 1938.68 193.316   2
  -4   2   8 23539.1 563.398   4
   4   2  -8 22942.0 621.394   2
  -4   2   7 886.071 110.481   4
   4   2  -7 785.065 117.287   2
  -4   2   6 12949.5 402.652   4
   4   2  -6 13016.7 438.394   2
  -4   2   5 1343.74 132.626   4
   4   2  -5 1260.70 132.361   2
  -4   2   4 4256.68 233.392   4
   4   2  -4 4249.80 239.431   2
   4   2  -3 1596.40 149.660   2
  -4   2   3 1626.09 146.768   4
  -4   2   2 22927.2 245.565   2
  -4   2   2 23998.5 553.338   4
   4   2  -2 23042.7 547.198   2
  -4   2   1 118.678 49.0970   4
   4   2  -1 111.774 51.4406   2
  -4   2   1 184.661 32.1076   2
  -4   2   0 54976.3 872.272   4
  -4   2   0 53314.8 576.402   2
  -4   2  -1 3720.74 237.608   4
  -4   2  -1 3909.62 178.854   2
  -4   2  -2 237610. 1531.30   2
  -4   2  -2 240442. 1925.38   4
  -4   2  -3 235.452 80.7638   4
  -4   2  -3 314.044 65.6233   2
   4   2   4 56323.0 745.421   3
  -4   2  -4 55435.0 881.015   2
  -4   2  -4 55817.8 995.863   4
   4   2   5 2277.81 160.384   3
  -4   2  -5 1926.14 181.605   2
  -4   2  -5 2003.66 199.630   4
  -4   2  -6 6802.80 358.390   2
  -4   2  -6 6638.83 372.841   4
   4   2   6 6575.64 284.733   3
   4   2   7 396.055 75.1184   3
  -4   2  -7 252.864 84.4384   4
  -4   2  -7 169.567 87.7445   2
  -4   2  -8 60628.7 1214.65   2
  -4   2  -8 59181.1 1172.67   4
   4   2   8 60522.6 966.640   3
  -4   2  -9 5873.69 386.783   4
   4   2   9 5344.91 298.784   3
  -4   2 -10 3379.47 324.670   2
  -4   2 -11 1259.27 213.325   2
  -4   2 -12 8550.01 570.741   2
  -4   2 -13 701.040 173.775   2
  -4   2 -14 6013.87 513.380   2
  -4   2 -15 769.929 131.776   7
  -4   2 -15 443.065 155.645   2
  -4   2 -16 1088.01 147.250   8
  -4   2 -16 989.784 155.863   7
  -4   2 -16 1188.01 242.266   2
  -4   2 -17 288.329 80.7897   8
  -4   2 -17 111.229 67.2078   7
  -4   2 -18 6533.24 352.355   8
  -4   2 -18 6659.15 405.334   7
  -4   2 -19 70.9931 66.2642   8
  -4   2 -19 9.50223 79.9300   7
  -4   2 -20 2874.37 224.065   8
  -4   2 -20 2959.81 267.702   7
  -4   2 -21 112.376 55.5585   8
  -4   2 -21-1.70580 54.6313   7
  -4   2 -22 414.472 102.496   7
  -4   2 -23 181.290 70.6188   7
  -4   2 -24 760.897 110.222   7
  -4   2 -25 653.081 89.6889   7
   4   3 -26 1813.95 148.663   7
   4   3 -25 26.1010 43.8610   7
   4   3 -24 3181.49 226.205   7
  -4   3  23 132.312 68.2676   6
   4   3 -23 173.294 64.2421   7
   4   3 -22 1288.18 158.711   7
  -4   3  22 1335.89 182.876   6
   4   3 -21 586.752 114.492   7
  -4   3  21 669.723 123.596  10
  -4   3  21 634.354 124.276   6
  -4   3  20 13275.0 540.212   6
  -4   3  20 11818.2 473.923  10
  -4   3  19 478.823 117.891   6
  -4   3  19 423.769 97.0158  10
  -4   3  18 14263.0 502.264  10
   4   3 -18 15062.3 774.078   2
  -4   3  18 15956.5 575.053   6
  -4   3  17 94.9227 47.2617   6
  -4   3  17 122.923 45.4758  10
   4   3 -16 232.201 130.139   2
   4   3 -15-48.7085 51.2306   2
   4   3 -14 15821.8 710.268   2
   4   3 -13 616.557 127.811   2
   4   3 -12 23017.6 799.223   2
   4   3 -11 462.205 120.537   2
   4   3 -10 100001. 1559.65   2
  -4   3  10 96759.0 1204.88   4
   4   3  -9 644.643 129.536   2
  -4   3   9 723.718 107.542   4
  -4   3   8 3729.18 229.955   4
   4   3  -8 3504.44 276.919   2
  -4   3   7 104.917 41.9213   4
   4   3  -7-19.9821 56.0543   2
  -4   3   6 57975.3 897.061   4
   4   3  -6 62849.0 1096.60   2
  -4   3   5 2044.22 169.038   4
   4   3  -5 2224.39 205.238   2
  -4   3   4 19298.6 527.714   4
   4   3  -4 20020.9 605.946   2
   4   3  -3 146.411 73.5398   2
  -4   3   3 105.410 54.1396   4
  -4   3   2 6521.47 207.732   2
  -4   3   2 6578.05 321.769   4
   4   3  -2 6602.43 341.218   2
  -4   3   1 1752.67 171.308   4
   4   3  -1 2245.20 202.410   2
  -4   3   1 2066.49 128.536   2
  -4   3   0 106017. 1332.44   4
  -4   3   0 100369. 976.898   2
  -4   3  -1 2968.31 233.599   4
  -4   3  -1 2941.00 183.521   2
  -4   3  -2 188750. 1887.47   4
  -4   3  -2 181397. 1545.57   2
  -4   3  -3 7206.65 382.197   4
  -4   3  -3 6715.69 320.930   2
  -4   3  -4 87965.0 1219.60   2
  -4   3  -4 91518.9 1416.98   4
  -4   3  -5 897.710 137.089   2
  -4   3  -5 1154.51 169.213   4
  -4   3  -6 45462.4 1005.55   2
  -4   3  -6 43579.7 1039.61   4
  -4   3  -7 1962.46 231.231   2
  -4   3  -7 2070.55 234.553   4
  -4   3  -8 14598.3 641.571   2
  -4   3  -8 14439.3 637.785   4
  -4   3  -9 287.090 98.4874   2
  -4   3  -9 354.436 123.142   4
  -4   3 -10 17873.8 792.852   2
  -4   3 -11 20.8263 98.0705   2
  -4   3 -12 24682.1 1018.95   2
  -4   3 -13-106.927 97.8948   2
  -4   3 -14 970.260 148.505   7
  -4   3 -14 752.550 167.300   2
  -4   3 -15 708.342 134.881   7
  -4   3 -15 419.838 137.021   2
  -4   3 -16 7972.48 431.555   7
  -4   3 -17 342.958 100.107   7
  -4   3 -18 1109.03 169.011   7
  -4   3 -19 613.198 128.915   7
  -4   3 -20 1736.90 202.655   7
  -4   3 -21 544.059 108.828   7
   4   3  21 638.440 111.180   5
   4   3  22 1730.10 155.026   5
  -4   3 -22 2237.70 202.483   7
  -4   3 -23 113.894 45.4378   7
  -4   3 -24 334.785 70.6368   7
  -4   3 -25 455.373 63.3800   7
  -4   3 -25 518.765 70.3984  14
  -4   4  22 7023.88 389.380   6
  -4   4  21 779.709 141.167   6
  -4   4  20 956.440 155.896   6
  -4   4  19 393.573 109.831   6
  -4   4  18 3558.71 246.856   9
  -4   4  18 3343.53 276.909   6
  -4   4  18 3153.97 254.478  10
  -4   4  17 102.428 65.7558   9
  -4   4  17 50.7912 54.5363   6
  -4   4  17 68.5425 58.1994  10
   4   4 -17 214.607 132.738   2
  -4   4  16 3762.22 249.708   9
  -4   4  16 3445.41 259.387   6
   4   4 -16 3795.82 394.080   2
  -4   4  16 3587.61 257.497  10
   4   4 -15 414.837 131.613   2
   4   4 -14 6927.32 507.262   2
   4   4 -13 605.682 161.593   2
   4   4 -12 18328.9 778.880   2
   4   4 -11 117.360 71.9319   2
   4   4 -10 1330.01 196.063   2
   4   4  -9-5.48462 44.6705   2
  -4   4   8 75469.8 996.643   4
   4   4  -8 77757.8 1442.69   2
   4   4  -7 227.830 77.3836   2
  -4   4   7 470.993 88.9144   4
  -4   4   6 35180.9 715.885   4
   4   4  -6 35435.5 934.638   2
  -4   4   5 942.301 124.902   4
   4   4  -5 1140.36 174.533   2
  -4   4   4 1889.51 178.238   4
   4   4  -4 2096.26 226.134   2
   4   4  -3 487.553 114.647   2
  -4   4   3 275.002 80.8563   4
  -4   4   2 65731.0 825.986   2
  -4   4   2 66440.0 1096.84   4
   4   4  -2 65999.3 1229.13   2
   4   4  -1 2039.96 219.779   2
  -4   4   1 2082.06 207.889   4
  -4   4   1 2026.60 159.870   2
  -4   4   0 53601.3 851.914   2
  -4   4   0 56729.2 1067.95   4
  -4   4  -1 2020.45 176.760   2
  -4   4  -1 2174.35 214.872   4
  -4   4  -2 1303.22 179.289   4
  -4   4  -2 895.071 127.711   2
  -4   4  -3 2023.41 220.608   4
  -4   4  -3 1916.73 195.471   2
  -4   4  -4 59205.3 1128.93   2
  -4   4  -4 62846.2 1289.67   4
  -4   4  -5 6823.69 405.958   2
  -4   4  -5 7527.97 460.304   4
  -4   4  -6 12331.4 600.803   4
  -4   4  -6 12561.7 574.146   2
  -4   4  -7 1545.93 226.352   4
  -4   4  -7 1264.39 205.681   2
  -4   4  -8 26522.6 935.246   4
  -4   4  -8 25599.5 918.012   2
  -4   4  -9 29.2768 48.8278   2
  -4   4 -10 8003.36 565.927   2
  -4   4 -11 4159.38 421.362   2
  -4   4 -12 2953.56 376.008   2
  -4   4 -13 2453.70 345.892   2
  -4   4 -13 2247.07 216.061   7
  -4   4 -14 27608.9 754.990   7
  -4   4 -14 27481.8 1186.41   2
  -4   4 -15 8929.50 439.052   7
  -4   4 -16 731.351 135.834   7
  -4   4 -17 3969.71 298.826   7
  -4   4 -18 2883.01 250.986   7
  -4   4 -19 451.841 98.0045   7
   4   4  20 393.616 94.2475   5
  -4   4 -20 483.883 104.177   7
   4   4  21 63.9367 64.5587   5
  -4   4 -21 65.6148 44.6057   7
  -4   4 -22 261.609 74.8147   7
   4   4  22 103.880 47.8344   5
  -4   4 -23 13.2025 38.2603   7
   4   4  23 130.496 45.6687   5
  -4   4 -24 1215.47 91.0314   7
  -4   4 -24 1302.16 116.311  14
  -4   5  21 131.808 70.7695   6
  -4   5  20 832.847 115.236   9
  -4   5  20 937.730 152.654   6
  -4   5  19 508.055 96.8697   9
  -4   5  19 423.133 119.820   6
  -4   5  18 2152.91 225.028   6
  -4   5  18 1974.88 193.543   9
  -4   5  17-103.336 78.3537   9
  -4   5  17 1.72637 48.1355   6
  -4   5  16 3977.66 292.229   6
  -4   5  16 3890.14 271.441   9
   4   5 -16 3365.00 383.101   2
   4   5 -16 4063.88 227.772  11
  -4   5  15 657.681 114.784   9
   4   5 -15 445.148 137.750   2
   4   5 -15 685.677 100.926  11
  -4   5  15 456.542 95.3334   6
  -4   5  14 9365.55 416.688   6
  -4   5  14 8883.34 400.735   9
   4   5 -14 9163.91 617.436   2
   4   5 -13 269.040 119.602   2
   4   5 -12 7953.77 553.448   2
   4   5 -11 66.6560 59.8940   2
   4   5 -10 11983.0 652.203   2
   4   5  -9 204.351 91.0832   2
   4   5  -8 24516.4 903.334   2
   4   5  -7 606.520 135.174   2
   4   5  -6 7830.12 495.062   2
   4   5  -5 1501.84 221.893   2
  -4   5   5 827.926 117.332   4
  -4   5   4 52966.9 988.124   4
   4   5  -4 54399.2 1275.04   2
  -4   5   3 2971.56 241.623   4
   4   5  -3 3615.54 331.183   2
  -4   5   2 42762.6 956.779   4
   4   5  -2 46894.9 1154.31   2
  -4   5   1 470.150 108.024   4
  -4   5   0 5024.44 347.860   4
  -4   5   0 4683.83 294.045   2
  -4   5  -1 335.842 101.454   4
  -4   5  -1 305.209 60.5405   2
  -4   5  -2 811.781 155.542   4
  -4   5  -2 1189.45 162.780   2
  -4   5  -3 483.169 119.320   4
  -4   5  -3 429.916 115.251   2
  -4   5  -4 500.961 130.753   4
  -4   5  -4 646.071 139.923   2
  -4   5  -5 1510.57 227.636   4
  -4   5  -5 1266.36 199.031   2
  -4   5  -6 42490.0 1164.97   2
  -4   5  -6 43693.7 1225.59   4
  -4   5  -7 754.680 158.039   2
  -4   5  -8 5051.73 434.403   2
  -4   5  -9 1304.27 220.765   2
  -4   5 -10 10343.3 685.714   2
  -4   5 -11 321.574 161.839   2
  -4   5 -12 35457.4 1355.87   2
  -4   5 -14 4061.69 282.157   7
  -4   5 -15 3422.82 261.755   7
  -4   5 -16 10640.4 452.425   7
   4   5  16 10027.1 485.498   5
  -4   5 -17 1762.93 179.218   7
   4   5  17 1739.08 203.979   5
   4   5  18 1174.02 162.418   5
  -4   5 -18 1253.75 149.857   7
   4   5  19-1.48973 53.9883   5
  -4   5 -19 54.1480 56.8500   7
  -4   5 -20 2439.29 180.617   7
   4   5  20 2639.79 213.912   5
  -4   5 -21 232.565 57.0171   7
   4   5  21 279.350 75.3522   5
   4   5  22 2335.91 162.248   5
  -4   5 -22 2672.18 186.199  14
  -4   5 -23 855.611 95.0058  14
   4   5  23 813.378 80.2985   5
  -4   6  25 151.684 48.7620   5
  -4   6  25 138.498 31.2390  12
  -4   6  21 3.68800 43.0175   9
  -4   6  20 862.673 122.451   9
  -4   6  19 539.217 111.279   6
  -4   6  19 578.680 102.635   9
  -4   6  18 2878.11 247.689   6
  -4   6  18 3115.76 242.865   9
  -4   6  17-13.5855 56.4517   9
  -4   6  17 64.6703 70.1612   6
  -4   6  16 13261.6 522.886   6
   4   6 -16 13036.1 404.006  11
  -4   6  16 12422.6 499.808   9
  -4   6  15 469.083 114.919   9
  -4   6  15 274.278 79.2171   6
  -4   6  14 5324.51 321.371   6
   4   6 -14 5338.43 495.817   2
   4   6 -14 5757.31 287.013  11
  -4   6  14 5388.83 329.128   9
   4   6 -13 1023.75 205.954   2
  -4   6  13 821.672 133.820   9
  -4   6  13 730.561 110.407   6
   4   6 -13 731.626 108.890  11
  -4   6  12 53536.6 1011.36   9
   4   6 -12 55320.5 887.358  11
  -4   6  12 52125.0 936.169   6
   4   6 -12 54785.1 1550.05   2
   4   6 -11-225.254 104.169   2
  -4   6  11 227.954 73.8889   9
   4   6 -10 3626.05 391.111   2
   4   6  -9 25.5879 73.2978   2
   4   6  -8 16700.6 819.528   2
   4   6  -7-21.8819 66.6881   2
   4   6  -6 41231.1 1261.37   2
   4   6  -5 1310.20 224.520   2
   4   6  -4 16002.7 761.253   2
   4   6  -3 426.002 136.857   2
  -4   6   2 36783.0 920.412   4
  -4   6   1 2377.11 239.053   4
  -4   6   0 7476.81 446.633   4
  -4   6  -1 587.538 145.268   4
  -4   6  -2 25036.0 874.594   4
  -4   6  -3 1973.51 259.463   4
  -4   6  -4 3140.49 328.765   4
  -4   6  -5 581.181 187.510   2
  -4   6  -6 1203.66 221.494   2
   4   6   7 1160.46 166.977   5
  -4   6  -7 1014.49 219.977   2
   4   6   8 5088.10 283.522   9
  -4   6  -8 4226.78 431.476   2
   4   6   8 4773.42 266.673  12
   4   6   8 5026.81 336.438   5
   4   6   9 178.272 67.8162  12
   4   6   9 297.226 97.4927   5
   4   6   9 202.902 69.3024   9
  -4   6  -9 335.049 123.209   2
   4   6  10 6328.06 316.950   9
   4   6  10 5687.31 363.708   5
   4   6  10 6551.76 313.290  12
  -4   6 -10 5650.42 531.122   2
   4   6  11 306.478 98.0752   5
   4   6  11 214.145 63.4947  12
   4   6  11 338.075 83.4528   9
   4   6  12 2913.24 265.805   5
   4   6  12 2957.78 213.785   9
   4   6  13 57.7842 50.6192   9
   4   6  13 95.0838 64.7362   5
   4   6  14 1962.77 224.886   5
   4   6  15 764.506 143.668   5
   4   6  16 83.5841 60.6570   5
   4   6  17 851.541 142.746   5
   4   6  18 2435.01 217.547   5
   4   6  19 49.3701 58.5380   5
  -4   6 -19 116.425 64.1618  14
  -4   6 -20 1705.87 156.860  14
   4   6  20 1743.68 160.054   5
   4   6  21 140.742 47.8797   5
  -4   6 -21 270.764 66.6993  14
   4   6  22 106.117 42.0157   5
  -4   6 -22 88.2975 39.4816  14
  -4   7  24 469.704 54.1070  12
  -4   7  24 709.993 84.5440   5
  -4   7  23-21.0510 26.9944  12
  -4   7  23 38.6473 38.6854   5
  -4   7  22 154.441 40.7934   9
  -4   7  22 89.0968 48.0810   5
  -4   7  22 120.236 47.6230  12
  -4   7  21 213.527 53.1056   9
  -4   7  21 184.921 69.6367   5
  -4   7  20 4373.22 240.322   9
  -4   7  19 298.155 75.4732   9
  -4   7  18 2757.68 219.595   9
  -4   7  17 161.935 66.1279   9
  -4   7  16 1674.79 179.601   6
  -4   7  16 1704.95 184.463   9
  -4   7  15 848.324 135.790   9
   4   7 -15 949.551 121.307  11
  -4   7  15 939.227 137.571   6
  -4   7  14 30599.0 792.112   9
  -4   7  14 30878.2 746.921   6
   4   7 -14 31815.9 667.899  11
  -4   7  13 7.84780 63.3950   9
  -4   7  13 33.3159 48.7947   6
  -4   7  12 464.281 111.734   9
   4   7 -12 479.900 107.845  11
  -4   7  12 414.772 84.2555   6
  -4   7  11 93.1668 75.0896   9
   4   7 -11 198.390 60.8319  11
   4   7 -10 30696.5 1196.87   2
   4   7 -10 30798.8 712.401  11
  -4   7  10 29959.3 775.080   9
   4   7  -9 855.559 135.571  11
   4   7  -9 717.460 177.354   2
  -4   7   9 781.523 131.372   9
   4   7  -8 2518.33 346.976   2
   4   7  -8 2698.84 216.036  11
  -4   7   8 2676.69 230.106   9
   4   7  -7 160.415 77.1041   5
  -4   7   7 197.254 78.5653   9
   4   7  -7 267.430 159.377   2
   4   7  -7 70.9787 54.2274  11
   4   7  -6 28450.5 1116.25   2
  -4   7   6 26588.9 687.871   9
   4   7  -5 174.640 81.9862   2
   4   7  -4 30089.5 1125.31   2
   4   7   0 32607.8 736.041  12
   4   7   1 1123.81 142.494  12
   4   7   1 1185.87 139.712   9
   4   7   2 9970.19 400.059   9
   4   7   2 10233.2 458.774   5
   4   7   2 10446.5 418.633  12
   4   7   3 899.501 148.664   5
   4   7   3 1057.89 138.804  12
   4   7   3 1011.73 137.796   9
   4   7   4 13411.8 475.416  12
   4   7   4 13017.9 472.669   9
   4   7   4 13446.0 548.482   5
   4   7   5 1102.82 156.621   5
   4   7   5 1377.13 160.874   9
   4   7   5 1316.72 153.585  12
   4   7   6 8685.28 386.183  12
   4   7   6 8961.37 397.097   9
   4   7   6 8832.15 454.672   5
   4   7   7 800.825 127.035   9
   4   7   7 822.955 153.566   5
  -4   7  -7 727.525 119.754  14
   4   7   7 972.093 137.720  12
  -4   7  -8 15047.0 530.999  14
   4   7   8 14995.4 505.868  12
   4   7   8 15513.3 530.911   9
   4   7   8 14582.4 591.161   5
  -4   7  -9 1229.05 158.908  14
   4   7   9 1138.38 141.261  12
   4   7   9 1086.15 144.164   9
   4   7   9 1019.42 162.797   5
   4   7  10 3223.70 232.751  12
  -4   7 -10 3414.17 265.000  14
   4   7  10 3157.72 236.334   9
   4   7  10 3277.05 292.307   5
   4   7  11-66.8966 69.2350   9
   4   7  11 15.3984 48.8540  12
  -4   7 -11-16.4365 52.6370  14
   4   7  11 1.88555 72.8269   5
   4   7  12 849.393 154.233   5
  -4   7 -12 863.844 143.851  14
   4   7  12 952.443 125.290  12
   4   7  12 1074.89 138.472   9
   4   7  13 111.258 76.2100   5
  -4   7 -13 86.7940 62.4599  14
   4   7  13 144.214 57.5001  12
   4   7  14 809.105 112.029   9
  -4   7 -14 721.360 128.462  14
   4   7  14 881.851 143.860   5
   4   7  15 8.83921 72.4699   5
   4   7  15 66.4169 44.2274   9
  -4   7 -15 95.8982 67.2903  14
  -4   7 -16 1237.36 149.761  14
   4   7  16 1199.21 158.538   5
   4   7  17 558.253 109.840   5
  -4   7 -17 468.417 88.6916  14
  -4   7 -18 1128.37 126.448  14
   4   7  18 1199.48 142.737   5
  -4   7 -19 190.745 52.4158  14
   4   7  19 245.628 72.5896   5
   4   7  20 441.365 70.5695   5
  -4   7 -20 453.371 64.5270  14
  -4   8  22 781.035 75.5814  12
  -4   8  21 128.223 33.1906   9
  -4   8  21 197.812 50.7341   5
  -4   8  21 179.306 45.7176  12
  -4   8  20 468.303 71.7492   9
  -4   8  20 459.305 78.1451  12
  -4   8  20 512.671 85.0934   5
  -4   8  19 78.9846 42.4421   9
  -4   8  19 77.3873 61.8393   5
  -4   8  19 23.4746 43.4646  12
  -4   8  18 2831.18 219.392   5
  -4   8  18 3085.76 220.542  12
  -4   8  18 3179.14 211.210   9
  -4   8  17 122.524 56.4430   9
  -4   8  17 103.461 50.4650   5
  -4   8  17 169.817 77.7716  12
  -4   8  16 2304.92 210.084   5
  -4   8  16 2965.77 229.523   9
  -4   8  15-45.0200 67.8631   9
  -4   8  15 155.424 73.5274   5
   4   8 -15 101.657 58.3874  11
  -4   8  14 5345.82 325.436   9
   4   8 -14 5452.69 261.837  11
   4   8 -13 86.9738 56.3862  11
  -4   8  13 54.5650 70.8680   9
   4   8 -12 5067.68 279.916  11
  -4   8  12 5171.45 327.641   9
   4   8 -11 251.462 81.2963  11
  -4   8  11 174.196 76.6162   9
   4   8 -10 354.725 95.8230  11
  -4   8  10 316.047 89.8965   9
  -4   8   9 63.8437 67.5342   9
   4   8  -9 27.7592 60.1808  11
   4   8  -8 11014.0 444.529  11
  -4   8   8 10483.8 477.256  12
  -4   8   8 10678.5 466.443   9
  -4   8   7 888.479 139.048   9
  -4   8   7 882.087 145.774  12
   4   8  -7 1117.68 152.999  11
  -4   8   6 16993.1 593.956  12
   4   8  -6 18672.2 564.430   5
   4   8  -6 17259.7 558.471  11
  -4   8   6 17263.5 578.049   9
   4   8  -5 139.373 71.9444   5
  -4   8   5 264.929 75.6232   9
  -4   8   5 213.007 72.7209  12
   4   8  -5 409.064 91.5590   9
  -4   8   4 5666.61 319.415   9
   4   8  -4 5649.03 306.696   9
  -4   8   4 5797.23 331.368  12
   4   8  -4 6341.98 347.362   5
   4   8  -3 6.51243 63.8676   5
  -4   8   3 63.0449 53.7389   9
  -4   8   3 9.29315 48.5903  12
   4   8  -3 7.62599 45.9969   9
  -4   8   2 17731.8 545.861  12
   4   8  -2 16775.9 533.752   9
   4   8  -2 17152.9 583.048   5
   4   8  -1 162.856 78.2387   5
   4   8  -1 215.339 76.6236   9
   4   8   0 24174.3 652.328   9
   4   8   0 24290.9 715.378   5
   4   8   1 1951.63 192.111   9
   4   8   1 1782.52 201.143   5
   4   8   2 7408.05 383.227  12
   4   8   2 7227.21 405.811   5
   4   8   2 7996.39 384.341   9
   4   8   3 157.352 81.9377  12
   4   8   3 70.1228 69.6435   5
   4   8   3 37.7306 54.4196   9
   4   8   4 18213.7 593.387  12
   4   8   4 17891.4 576.387   9
   4   8   4 17125.1 634.599   5
   4   8   5 271.019 87.8663   9
   4   8   5 277.784 100.133   5
   4   8   5 297.839 89.0021  12
   4   8   6 1411.17 172.398  12
   4   8   6 1423.71 165.450   9
   4   8   6 1426.77 193.755   5
   4   8   7 546.910 109.707   9
   4   8   7 576.606 131.822   5
   4   8   7 443.076 99.9140  12
   4   8   8 12463.4 477.060   9
   4   8   8 11809.2 457.769  12
   4   8   8 12069.1 538.998   5
   4   8   9 269.556 80.9487   9
   4   8   9 262.565 109.190   5
   4   8   9 186.747 72.7572  12
   4   8  10 10367.8 409.329  12
   4   8  10 10544.4 425.520   9
   4   8  10 10575.0 493.008   5
   4   8  11 1052.50 136.099   9
   4   8  11 1015.00 162.453   5
   4   8  11 1153.36 134.228  12
  -4   8 -11 1262.85 153.147  14
   4   8  12 808.805 144.750   5
  -4   8 -12 775.010 113.729  14
   4   8  12 751.100 108.618  12
   4   8  12 766.504 114.676   9
   4   8  13 462.263 118.976   5
   4   8  13 382.831 76.4795  12
  -4   8 -13 152.388 53.0291  14
   4   8  13 229.067 64.4664   9
  -4   8 -14 1084.24 125.191  14
   4   8  14 1328.68 166.971   5
   4   8  14 1007.79 110.058   9
   4   8  15 463.166 74.2759   9
  -4   8 -15 398.623 77.1222  14
   4   8  15 343.590 82.9635   5
   4   8  16 891.488 118.815   5
  -4   8 -16 751.091 92.2996  14
  -4   8 -17 196.553 49.6342  14
   4   8  17 157.119 61.1516   5
  -4   8 -18 1329.73 87.7073  14
   4   8  18 1680.82 133.304   5
  -4   9  19 192.943 45.6793   9
  -4   9  19 235.312 51.2846  12
  -4   9  18 906.002 96.8847   9
  -4   9  18 1109.77 115.785  12
  -4   9  17 53.2402 49.0577  12
  -4   9  17-5.18050 42.4026   9
  -4   9  16 3455.68 227.209  12
  -4   9  16 3335.94 212.419   9
  -4   9  15 311.376 88.2354  12
  -4   9  15 323.495 80.9524   9
  -4   9  14 223.619 73.8112   9
  -4   9  14 406.415 108.078  12
  -4   9  13 25.6084 55.1537   9
   4   9 -13 67.7322 50.6572  11
  -4   9  13 37.4488 63.6786  12
  -4   9  12 2747.24 238.266  12
  -4   9  12 2825.07 226.576   9
   4   9 -12 2316.91 174.442  11
  -4   9  11 98.6248 65.8796   9
  -4   9  11 135.710 83.1303  12
   4   9 -11 93.9312 63.4866  11
   4   9 -10 5508.72 291.011  11
  -4   9  10 6052.71 358.243  12
  -4   9  10 5780.72 330.465   9
  -4   9   9 149.295 78.0603   9
  -4   9   9 34.2862 66.7679  12
   4   9  -9 46.7580 56.1656  11
  -4   9   8 4665.91 319.331  12
   4   9  -8 4642.14 285.551  11
  -4   9   8 4799.96 304.388   9
  -4   9   7 246.072 79.1850   9
   4   9  -7 354.268 98.9602  11
  -4   9   7 198.327 84.1179  12
  -4   9   6 2890.96 246.685  12
   4   9  -6 2579.22 222.391  11
  -4   9   6 2453.98 221.043   9
  -4   9   5 41.9139 51.8042   9
   4   9  -5 190.469 66.0513   9
   4   9  -5 253.855 83.9583  11
  -4   9   5 153.097 74.0179  12
  -4   9   4 21907.9 641.108  12
   4   9  -4 20622.7 587.153   9
   4   9  -4 21937.8 610.522   5
  -4   9   4 21398.5 611.604   9
   4   9  -3 427.293 97.5681   5
   4   9  -3 397.215 99.7710   9
  -4   9   3 541.997 105.818   9
  -4   9   3 568.443 111.352  12
   4   9  -2 4817.95 292.322   9
  -4   9   2 5228.15 297.955  12
   4   9  -2 5131.48 314.055   5
   4   9  -1 3.21930 62.7661   5
   4   9  -1 76.8413 58.4958   9
   4   9   0 9920.35 448.241   5
   4   9   0 9681.41 418.207   9
   4   9   1 132.251 71.2558   5
   4   9   1 168.471 77.9112   9
   4   9   2 2106.35 216.164   5
   4   9   2 1843.86 190.189   9
   4   9   3 34.4767 65.9450   5
   4   9   3 98.9350 59.0375   9
   4   9   4 797.818 129.825   9
   4   9   4 838.680 137.817   5
   4   9   5 616.977 123.168   5
   4   9   5 919.830 139.361   9
   4   9   6 9659.84 413.081   9
   4   9   6 9477.99 448.079   5
   4   9   7 431.345 95.1160   9
   4   9   7 328.606 102.733   5
   4   9   8 2317.67 220.834   5
   4   9   8 2591.91 209.444   9
   4   9   9 558.722 101.357   9
   4   9   9 587.429 118.142   5
   4   9  10 2494.54 194.514   9
   4   9  10 2336.75 211.850   5
   4   9  11 320.871 79.1540   9
   4   9  11 278.350 80.2016   5
   4   9  12 1533.62 160.277   5
   4   9  12 1574.26 138.996   9
   4   9  13 403.276 91.4422   5
   4   9  13 461.823 74.3741   9
   4   9  14 354.937 74.2507   5
   4   9  14 338.161 59.8571   9
   4   9  15 156.542 34.0502   9
   4   9  15 233.151 59.2431   5
   4   9  16 6875.00 241.871   5
  -4  10  16 1351.25 115.728  12
  -4  10  16 1345.65 107.788   9
  -4  10  15 64.9356 43.0991   9
  -4  10  15 113.978 52.7525  12
  -4  10  14 979.506 116.463  12
  -4  10  14 1046.52 113.162   9
  -4  10  13 538.401 87.0514   9
  -4  10  13 538.548 95.0835  12
   4  10 -12 3102.43 153.050  11
  -4  10  12 3473.03 231.812  12
  -4  10  12 3584.52 218.912   9
  -4  10  11 165.507 64.4083   9
  -4  10  11 190.104 73.8761  12
   4  10 -11 112.516 42.1029  11
  -4  10  10 519.710 99.4017  12
  -4  10  10 387.389 86.2177   9
   4  10 -10 405.070 75.4840  11
  -4  10   9 61.2389 53.1892   9
  -4  10   9-1.02939 50.2384  12
   4  10  -9 51.2228 48.1944  11
   4  10  -8 1698.20 156.476  11
  -4  10   8 1418.64 148.741   9
  -4  10   8 1713.19 181.288  12
  -4  10   7-8.62704 46.1578   9
   4  10  -7 15.4137 57.5298  11
  -4  10   7-14.2794 47.8149  12
  -4  10   6 4517.15 276.591  12
   4  10  -6 4005.77 246.834  11
  -4  10   6 4157.28 254.783   9
  -4  10   5 93.6287 56.2939   9
   4  10  -5 126.810 69.6545  11
  -4  10   5 52.4014 53.3840  12
  -4  10   4 3897.36 237.078   9
   4  10  -4 3762.71 248.507  11
   4  10  -4 3637.81 222.803   9
   4  10  -3 59.9703 48.9100   9
   4  10  -3 76.3192 61.3601  11
   4  10  -2 5330.63 296.858  11
   4  10  -2 4903.66 273.764   9
   4  10  -1 149.067 61.8888   5
   4  10  -1 58.7936 51.7713   9
   4  10   0 689.563 108.243   5
   4  10   0 540.614 101.641   9
   4  10   1 54.7360 51.8190   5
   4  10   1 75.6396 53.3695   9
   4  10   2 1077.28 136.289   5
   4  10   2 1516.89 163.213   9
   4  10   3 248.429 76.9207   9
   4  10   3 138.319 69.7908   5
   4  10   4 5449.55 286.812   9
   4  10   4 5792.04 309.993   5
   4  10   5 109.019 59.1533   9
   4  10   5 72.1020 57.6949   5
   4  10   6 1020.35 130.841   5
   4  10   6 1046.38 128.057   9
   4  10   7 517.910 88.4986   9
   4  10   7 436.797 89.0125   5
   4  10   8 2738.20 196.672   5
   4  10   8 2911.98 192.777   9
   4  10   9 185.852 62.3008   9
   4  10   9 41.3219 42.0675   5
   4  10  10 687.276 95.0538   5
   4  10  10 721.250 92.4162   9
   4  10  11 22.8966 35.0266   5
   4  10  11 5.91530 33.8982   9
   4  10  12 236.072 50.5618   9
   4  10  12 224.944 52.1682   5
  -4  11  11 97.2989 39.5298   9
  -4  11  10 8177.54 268.016   9
  -4  11   9 3.07947 34.0746   9
   4  11  -9 25.8040 26.4540  11
   4  11  -8 3842.09 169.543  11
  -4  11   8 4189.42 201.335   9
  -4  11   7-8.32635 42.9571   9
   4  11  -7 28.7792 38.3259  11
   4  11  -6 1990.95 139.284  11
  -4  11   6 2090.90 138.921   9
   4  11  -5 63.5707 42.4545  11
   4  11  -4 2365.52 161.590  11
   4  11  -3 119.287 60.1108  11
   4  11  -2 681.214 95.3423  11
   4  11  -2 683.447 82.8102   9
   4  11  -1-20.0651 35.9069   9
   4  11  -1 1.10909 45.9879  11
   4  11   0 862.894 107.762  11
   4  11   0 813.650 99.0503   9
   4  11   1 105.008 46.3752  11
   4  11   1 152.420 52.0498   9
   4  11   2 1911.31 147.343  11
   4  11   2 1926.33 145.800   9
   4  11   3 158.229 51.3505   9
   4  11   3 207.215 62.1419  11
   4  11   4 1463.28 120.936  11
   4  11   4 1413.99 108.938   5
   4  11   4 1555.98 129.111   9
   4  11   5 24.3011 36.4854   9
   4  11   5 39.6112 39.1835  11
   4  11   5 52.8651 30.9693   5
   4  11   6 899.565 84.1717   5
   4  11   6 947.724 91.7347  11
   4  11   6 975.857 97.5658   9
   4  11   7 81.3277 29.7199   5
   4  11   7 13.9477 30.6309  11
   4  11   7 52.1717 36.0533   9
   4  11   8 1061.77 82.4011  11
   4  11   8 1094.75 92.6721   9
   5  -7 -22 1669.40 120.297   8
   5  -7 -21 105.444 41.7306   8
   5  -7 -20 1241.88 122.815   8
  -5  -7   9 96.1677 67.3263   1
  -5  -7   8 2366.53 333.036   1
  -5  -7   7-447.714 144.526   1
  -5  -7   6 6904.46 559.941   1
  -5  -7   5 203.244 126.161   1
  -5  -7   4 12269.9 755.296   1
  -5  -7   3 338.200 163.897   1
  -5  -7   2 10928.9 718.909   1
  -5  -7   1 1150.12 230.199   1
  -5  -7   0 53585.6 1588.26   1
  -5  -7  -1 951.610 196.529   1
  -5  -7  -2 239.713 70.5928   1
  -5  -7  -3 1744.95 271.937   1
  -5  -7  -4 45310.8 1418.47   1
  -5  -7  -5 2337.34 315.514   1
   5  -6 -25 106.003 37.9371   8
   5  -6 -24 1098.09 112.775   8
   5  -6 -23 272.712 72.7117   8
   5  -6 -22 1225.41 135.750   8
   5  -6 -22 1226.17 122.109   7
   5  -6 -21 101.583 59.9653   8
   5  -6 -21 127.680 54.1617   7
   5  -6 -20 7103.35 345.674   8
   5  -6 -20 6483.64 305.713   7
   5  -6 -19-28.5757 42.2754   8
   5  -6 -19 14.0724 40.5663   7
  -5  -6   8 11432.0 689.430   1
  -5  -6   7 487.249 163.588   1
  -5  -6   6 11219.5 673.010   1
  -5  -6   5 645.977 182.571   1
  -5  -6   4 9310.24 602.439   1
  -5  -6   3 376.671 143.350   1
  -5  -6   2 38279.8 1230.66   1
  -5  -6   1 2535.77 321.076   1
  -5  -6   0 10024.8 641.902   1
  -5  -6  -1 187.645 63.6453   1
  -5  -6  -2 55890.0 1537.94   1
   5  -6   3 3863.56 336.869   3
  -5  -6  -3 4353.94 425.984   1
   5  -6   4 1763.11 237.452   3
  -5  -6  -4 1586.93 268.131   1
   5  -6   5 1484.33 218.806   3
  -5  -6  -5 1214.87 222.028   1
   5  -6   6 2490.03 304.576   3
  -5  -6  -6 2308.97 305.002   1
   5  -6   7 246.290 97.0463   3
  -5  -6  -7 140.492 100.280   1
   5  -6   8 13362.1 737.983   3
  -5  -6  -8 14665.4 764.300   1
   5  -6   9 1324.44 234.276   3
  -5  -6  -9 1110.99 229.952   1
  -5  -6 -16 3528.80 221.910   8
  -5  -6 -17 290.199 66.4322   8
  -5  -6 -18 2585.41 172.121   8
  -5  -6 -19 619.801 81.3317   8
  -5  -6 -20 59.7434 33.6609   8
   5  -5 -27 205.570 47.6160   8
   5  -5 -26 4118.58 212.348   8
   5  -5 -26 4041.37 184.585   7
   5  -5 -25 80.1144 43.7721   8
   5  -5 -25 76.1538 39.7812   7
   5  -5 -24 830.680 116.699   8
   5  -5 -24 754.833 103.629   7
   5  -5 -23 261.193 75.2353   7
   5  -5 -23 182.826 67.5870   8
   5  -5 -22 8704.65 400.832   8
   5  -5 -22 8155.15 369.895   7
   5  -5 -21 54.2233 61.8912   8
   5  -5 -21 10.6803 55.2691   7
   5  -5 -20 5277.37 312.028   7
   5  -5 -19 253.429 80.4886   7
   5  -5 -18 7287.80 368.832   7
  -5  -5  16 23765.6 926.629   3
  -5  -5  15 438.269 125.310   3
  -5  -5  14 606.692 141.540   3
  -5  -5  13 142.646 67.4533   3
  -5  -5  12 47722.9 1176.46   3
  -5  -5  11 354.881 95.4433   3
  -5  -5  10 8289.17 449.133   3
  -5  -5   9 35.5759 31.2306   3
  -5  -5   8 14479.7 528.168   3
  -5  -5   5 277.463 109.444   1
  -5  -5   4 8525.85 524.866   1
  -5  -5   3 983.713 183.094   1
  -5  -5   2 18067.4 762.273   1
   5  -5  -1 369.377 91.3721   3
  -5  -5   1 630.797 156.576   1
  -5  -5   0 2557.46 300.671   1
   5  -5   0 2280.91 235.396   3
  -5  -5  -1 802.347 153.808   1
   5  -5   1 841.754 152.421   3
  -5  -5  -2 3675.33 364.008   1
   5  -5   2 3376.48 308.634   3
   5  -5   3 1551.42 214.287   3
  -5  -5  -3 1517.18 224.005   1
   5  -5   4 62627.3 1416.17   3
  -5  -5  -4 63122.1 1498.61   1
  -5  -5  -5 2208.31 284.572   1
   5  -5   5 2176.87 276.646   3
  -5  -5  -6 3873.86 381.964   1
   5  -5   6 4407.40 406.009   3
   5  -5   7 1118.39 196.334   3
  -5  -5  -7 1453.50 248.040   1
   5  -5   8 4321.01 433.737   3
  -5  -5  -8 4832.86 423.702   1
   5  -5   9 660.738 166.857   3
  -5  -5  -9 858.487 172.369   1
  -5  -5 -10 8258.99 559.163   1
   5  -5  10 7814.84 601.557   3
   5  -5  11 7486.16 594.396   3
  -5  -5 -11 8796.94 571.306   1
  -5  -5 -12 15782.9 521.356   8
  -5  -5 -13 716.095 119.433   8
  -5  -5 -14 4870.03 306.928   8
  -5  -5 -15 1124.49 154.702   8
  -5  -5 -16 2625.05 224.773   8
  -5  -5 -17 2070.90 198.637   8
  -5  -5 -18 3613.11 249.644   8
  -5  -5 -19 63.8113 56.4625   8
  -5  -5 -20 2323.07 182.356   8
  -5  -5 -21 114.183 47.0160   8
  -5  -5 -22 1066.96 96.6359   8
   5  -4 -28 2554.64 149.787   8
   5  -4 -28 2406.87 133.441   7
   5  -4 -27 161.372 48.8357   8
   5  -4 -27 201.364 53.1789   7
   5  -4 -26 914.760 117.584   8
   5  -4 -26 776.895 105.786   7
   5  -4 -25 205.804 66.8955   7
   5  -4 -25 316.082 77.2933   8
   5  -4 -24 4481.62 286.785   8
   5  -4 -24 5034.90 295.161   7
   5  -4 -23-65.6481 57.2613   8
   5  -4 -23 130.825 69.7373   7
   5  -4 -22 2316.02 225.269   8
   5  -4 -22 2708.45 236.622   7
   5  -4 -21 491.064 104.974   7
   5  -4 -20 2893.49 246.766   7
   5  -4 -19 109.136 68.5641   7
  -5  -4  17-277.129 103.770   3
  -5  -4  16 481.865 134.627   3
  -5  -4  15 721.756 157.160   3
  -5  -4  14 47736.1 1264.01   3
  -5  -4  13 403.805 134.108   3
  -5  -4  12 683.706 144.945   3
  -5  -4  11 411.707 107.854   3
  -5  -4  10 19693.0 687.661   3
  -5  -4   9 544.910 111.100   3
  -5  -4   8 29944.3 765.551   3
  -5  -4   7 554.109 93.0669   3
  -5  -4   6 9441.28 380.823   3
  -5  -4   5 1364.61 143.453   3
  -5  -4   4 109118. 1671.57   1
  -5  -4   4 110717. 1143.87   3
  -5  -4   3 36.9835 66.5998   1
  -5  -4   2 104278. 1632.24   1
  -5  -4   1 1892.18 228.504   1
  -5  -4   1 2225.10 153.127   4
  -5  -4   0 31637.0 922.850   1
  -5  -4  -1 1744.75 227.583   1
   5  -4   2 21191.2 743.374   3
  -5  -4  -2 21819.7 792.093   1
  -5  -4  -3 813.120 157.357   1
   5  -4   3 818.602 157.775   3
  -5  -4  -4 33588.7 1000.75   1
   5  -4   4 33827.9 1003.00   3
   5  -4   5 3160.78 325.413   3
  -5  -4  -5 4056.15 352.414   1
  -5  -4  -6 86550.3 1632.77   1
   5  -4   6 84283.0 1699.12   3
  -5  -4  -7 5508.32 420.450   1
   5  -4   7 5701.55 459.429   3
   5  -4   8 2800.32 340.656   3
  -5  -4  -8 3232.22 330.214   1
  -5  -4  -9 367.824 119.912   1
   5  -4   9 382.684 159.390   3
  -5  -4 -10 1937.03 265.280   1
   5  -4  10 2001.14 302.312   3
  -5  -4 -11 316.643 108.913   1
   5  -4  11 340.345 143.437   3
  -5  -4 -12 11524.2 456.629   8
   5  -4  12 12396.4 770.299   3
  -5  -4 -12 12370.7 666.820   1
  -5  -4 -13 1610.16 183.802   8
  -5  -4 -13 1723.53 249.014   1
   5  -4  13 1603.48 276.094   3
  -5  -4 -14 34122.6 837.188   8
  -5  -4 -15 3561.86 279.805   8
  -5  -4 -16 1663.01 199.234   8
  -5  -4 -17 544.974 118.057   8
  -5  -4 -18 2523.72 234.001   8
  -5  -4 -19 2388.37 218.776   8
  -5  -4 -20 1150.65 145.640   8
  -5  -4 -21 170.051 63.2450   8
  -5  -4 -22 1442.58 141.366   8
  -5  -4 -23-31.9638 32.9947   8
   5  -3 -28 2156.56 154.351   7
   5  -3 -28 2198.29 156.089   8
   5  -3 -27 380.280 84.4531   8
   5  -3 -27 299.380 73.0714   7
   5  -3 -26 3074.18 221.856   8
   5  -3 -26 3298.22 231.448   7
   5  -3 -25 190.367 78.5901   8
   5  -3 -25 250.084 90.3279   7
   5  -3 -24 1527.99 180.790   8
   5  -3 -24 1447.19 177.322   7
   5  -3 -23 69.0871 61.0659   8
   5  -3 -23 123.611 70.7329   7
   5  -3 -22 3596.66 281.772   7
   5  -3 -21 445.972 106.261   7
   5  -3 -20 5564.29 346.631   7
   5  -3 -19 210.665 75.3891   7
  -5  -3  19 425.635 138.811   3
  -5  -3  18 3379.90 367.971   3
  -5  -3  17 10.2139 48.0528   3
  -5  -3  16 1642.19 246.589   3
  -5  -3  15 105.171 98.5494   3
  -5  -3  14 84.9984 60.7570   3
  -5  -3  13 73.9982 61.7774   3
  -5  -3  12 68879.7 1359.31   3
  -5  -3  11 838.917 145.081   3
  -5  -3  10 12896.2 536.504   3
  -5  -3   9 50.7512 44.0856   3
  -5  -3   8 87784.9 1269.02   3
  -5  -3   7 1237.43 150.570   3
  -5  -3   6 68320.5 1017.44   3
  -5  -3   5 1338.69 139.875   3
  -5  -3   4 10950.0 362.163   3
  -5  -3   3 3870.45 280.459   1
  -5  -3   2 50527.5 997.773   1
  -5  -3   1 1870.71 138.457   4
  -5  -3   1 1708.67 187.525   1
  -5  -3   0 102032. 1478.48   1
  -5  -3   0 102595. 936.017   4
  -5  -3  -1 2234.70 132.263   4
  -5  -3  -1 1966.10 220.632   1
  -5  -3  -2 23945.6 749.850   1
  -5  -3  -3 3292.87 282.748   1
  -5  -3  -4 2307.71 245.089   1
   5  -3   4 1847.19 227.298   3
   5  -3   5 2143.02 252.381   3
  -5  -3  -5 1846.25 219.792   1
   5  -3   6 16147.3 708.594   3
  -5  -3  -6 14611.7 608.683   1
   5  -3   7 2543.81 286.978   3
  -5  -3  -7 3073.23 289.878   1
   5  -3   8 42385.8 1228.90   3
  -5  -3  -8 42586.9 1086.12   1
  -5  -3  -9 327.577 100.097   1
   5  -3   9 209.600 100.574   3
  -5  -3 -10 29330.1 944.611   1
   5  -3  10 28453.1 1076.55   3
  -5  -3 -11 3743.81 354.308   1
   5  -3  11 3265.59 373.532   3
  -5  -3 -12 1607.77 234.633   1
   5  -3  12 1728.61 278.499   3
  -5  -3 -13 2548.80 291.975   1
  -5  -3 -13 2849.41 238.575   8
   5  -3  13 2229.56 331.974   3
  -5  -3 -14 4396.59 303.958   8
  -5  -3 -14 3411.66 354.879   1
   5  -3  14 4024.90 451.323   3
  -5  -3 -15 536.299 124.507   8
  -5  -3 -15 508.851 98.9198   7
  -5  -3 -16 1876.36 214.681   8
  -5  -3 -16 2293.11 211.153   7
  -5  -3 -17 2950.64 263.998   8
  -5  -3 -17 3266.48 251.846   7
  -5  -3 -18 390.452 103.304   8
  -5  -3 -18 210.996 79.5162   7
  -5  -3 -19 414.785 99.1272   7
  -5  -3 -19 450.004 114.038   8
  -5  -3 -20 924.963 126.127   7
  -5  -3 -20 997.588 145.582   8
  -5  -3 -21 1229.35 156.074   8
  -5  -3 -21 953.465 119.767   7
  -5  -3 -22 391.885 90.6800   8
  -5  -3 -22 296.503 68.4044   7
  -5  -3 -23 472.270 85.2232   8
  -5  -3 -23 383.109 62.6264   7
  -5  -3 -24 533.816 79.0611   8
   5  -2 -29 30.6146 33.0360   8
   5  -2 -29 13.1624 30.7317   7
   5  -2 -28 329.398 71.6162   8
   5  -2 -28 324.306 74.3891   7
   5  -2 -27 177.000 64.7797   8
   5  -2 -27 194.012 70.2363   7
   5  -2 -26 1244.10 146.941   8
   5  -2 -26 1306.37 160.326   7
   5  -2 -25 303.603 88.0437   8
   5  -2 -25 257.741 81.0639   7
   5  -2 -24 9558.01 442.070   8
   5  -2 -24 9804.62 461.328   7
   5  -2 -23 152.925 79.0036   8
   5  -2 -23 178.625 96.7752   7
   5  -2 -22 2339.89 233.078   7
   5  -2 -21 185.093 64.4843   7
   5  -2 -20 10715.3 479.783   7
  -5  -2  19 532.437 124.238   3
   5  -2 -19 773.020 135.332   7
  -5  -2  18 460.204 148.522   3
  -5  -2  17 133.711 86.7182   3
  -5  -2  16 3263.08 335.479   3
  -5  -2  15 479.711 129.281   3
  -5  -2  14 10422.6 561.682   3
  -5  -2  13 817.896 161.344   3
  -5  -2  12 5416.91 370.313   3
  -5  -2  11 2410.05 235.982   3
  -5  -2  10 116480. 1551.60   3
  -5  -2   9 3518.14 254.642   3
  -5  -2   8 40055.3 824.587   3
  -5  -2   7 77.7287 66.0365   3
  -5  -2   6 7669.65 332.295   3
  -5  -2   5 540.708 91.2799   3
  -5  -2   4 16279.3 437.299   3
  -5  -2   3 124.280 54.5096   1
  -5  -2   2 96345.8 1198.68   1
  -5  -2   2 98262.2 993.526   4
  -5  -2   1 10670.7 315.255   4
  -5  -2   1 9595.46 385.190   1
  -5  -2   0 93973.6 918.890   4
  -5  -2   0 91661.9 1223.60   1
  -5  -2  -1 541.957 104.768   1
  -5  -2  -1 605.510 75.1725   4
  -5  -2  -2 49687.0 634.702   4
  -5  -2  -2 47223.1 919.861   1
  -5  -2  -3 3989.19 178.492   4
  -5  -2  -3 4096.16 279.644   1
  -5  -2  -4 8239.12 250.126   4
  -5  -2  -4 8144.67 398.988   1
  -5  -2  -5 545.220 109.158   1
   5  -2   5 499.768 121.843   3
   5  -2   6 9419.26 507.772   3
  -5  -2  -6 10598.5 478.223   1
   5  -2   7 1582.10 221.368   3
  -5  -2  -7 1610.89 195.165   1
  -5  -2  -8 43180.7 1013.44   1
   5  -2   8 42636.8 1160.92   3
  -5  -2  -9 8591.00 468.549   1
   5  -2   9 7121.08 497.717   3
  -5  -2 -10 10587.6 544.135   1
   5  -2  10 10653.1 631.039   3
   5  -2  11 2900.80 347.882   3
  -5  -2 -11 3336.39 321.511   1
  -5  -2 -12 23138.5 862.099   1
   5  -2  12 24439.6 1017.53   3
  -5  -2 -13 8466.31 536.447   1
   5  -2  13 7871.83 596.754   3
  -5  -2 -14 2397.01 230.383   8
  -5  -2 -14 1648.09 261.430   1
  -5  -2 -14 2018.15 195.946   7
   5  -2  14 2670.51 346.924   3
   5  -2  15 876.810 228.382   3
  -5  -2 -15 830.156 132.673   8
  -5  -2 -15 746.830 125.790   7
  -5  -2 -15 1187.75 216.223   2
  -5  -2 -15 739.682 180.570   1
  -5  -2 -16 6857.42 395.970   8
  -5  -2 -16 6519.89 369.817   7
  -5  -2 -17 4.51561 57.0621   8
  -5  -2 -17 75.8909 77.1200   7
  -5  -2 -18 3876.29 300.568   8
  -5  -2 -18 3950.77 295.751   7
  -5  -2 -19 1517.81 190.707   8
  -5  -2 -19 1377.24 175.645   7
  -5  -2 -20 1304.37 177.837   8
  -5  -2 -20 996.202 149.702   7
  -5  -2 -21 126.312 74.1022   8
  -5  -2 -21 104.190 63.9458   7
  -5  -2 -22 1186.29 151.170   8
  -5  -2 -22 1315.93 146.059   7
  -5  -2 -23 72.1973 36.3914   7
  -5  -2 -23 4.25044 49.3050   8
  -5  -2 -24 209.379 58.2421   8
  -5  -2 -24 228.424 55.2556   7
  -5  -2 -25 545.866 70.1586   8
   5  -1 -29 106.626 39.8835   8
   5  -1 -29 123.767 45.6438   7
   5  -1 -28 636.151 88.1210   8
   5  -1 -28 788.761 112.408   7
   5  -1 -27 216.083 73.8401   7
   5  -1 -27 81.5578 45.8424   8
   5  -1 -26 1797.34 174.399   8
   5  -1 -26 1668.27 180.492   7
   5  -1 -25 239.858 87.2976   7
   5  -1 -25 166.432 68.9026   8
   5  -1 -24 6368.48 355.774   8
   5  -1 -24 6284.24 372.416   7
   5  -1 -23 847.539 148.921   7
   5  -1 -23 676.649 123.429   8
   5  -1 -22 15793.4 597.766   7
   5  -1 -21 338.230 106.200   7
  -5  -1  20 6787.34 528.422   3
   5  -1 -20 6596.38 377.508   7
  -5  -1  19 929.400 195.411   3
   5  -1 -19 978.762 141.038   7
  -5  -1  18 631.222 145.136   3
  -5  -1  17 505.331 137.475   3
  -5  -1  16 71629.5 1531.50   3
  -5  -1  15 611.466 145.293   3
  -5  -1  14 19120.1 731.320   3
   5  -1 -13 2704.62 191.926   2
  -5  -1  13 2883.53 271.602   3
   5  -1 -12 11560.2 370.498   2
  -5  -1  12 11129.5 510.080   3
  -5  -1  11 141.142 75.6976   3
   5  -1 -11 160.172 45.2350   2
  -5  -1  10 62318.8 1104.13   3
   5  -1 -10 63511.1 730.002   2
  -5  -1   9 3600.84 256.791   3
   5  -1  -9 4167.60 167.372   2
  -5  -1   8 581.234 109.218   3
   5  -1  -8 648.073 59.0146   2
   5  -1  -7 1887.87 75.4424   2
  -5  -1   7 2308.43 190.766   3
  -5  -1   6 77788.3 1029.52   3
  -5  -1   5 3794.44 222.195   3
  -5  -1   4 10067.6 335.954   4
  -5  -1   3 805.348 96.8100   4
  -5  -1   3 744.348 90.1914   1
  -5  -1   2 12393.9 352.551   4
  -5  -1   2 11018.4 338.239   1
  -5  -1   1 38.3529 37.6440   1
  -5  -1   1 61.0065 38.4797   4
  -5  -1   0 56117.0 734.672   4
  -5  -1   0 53293.9 794.477   1
  -5  -1  -1 5216.54 226.327   4
  -5  -1  -1 4931.17 251.086   1
  -5  -1  -2 6167.51 249.810   4
  -5  -1  -2 4343.49 242.836   1
  -5  -1  -3 7828.32 285.199   4
  -5  -1  -3 8572.66 349.243   1
  -5  -1  -4 45611.2 705.154   4
  -5  -1  -4 45465.9 838.337   1
  -5  -1  -5 786.308 95.1954   4
  -5  -1  -5 725.881 113.881   1
  -5  -1  -6 28098.6 580.717   4
   5  -1   6 27018.3 802.776   3
  -5  -1  -6 26494.2 687.855   1
  -5  -1  -7 4339.62 293.776   1
  -5  -1  -7 3674.40 217.829   4
   5  -1   7 3550.12 304.326   3
  -5  -1  -8 2175.72 219.907   1
   5  -1   8 816.000 161.355   3
  -5  -1  -9 1329.84 184.502   1
   5  -1   9 990.034 169.467   3
  -5  -1 -10 3150.81 293.710   1
   5  -1  10 2682.83 294.331   3
   5  -1  11 3922.88 384.111   3
  -5  -1 -11 3932.31 337.161   1
   5  -1  12 2234.39 300.557   3
  -5  -1 -12 1784.03 247.728   1
   5  -1  13 1013.40 209.387   3
  -5  -1 -13 1544.81 248.878   2
  -5  -1 -13 1139.28 195.239   1
  -5  -1 -14 11886.6 658.595   1
  -5  -1 -14 10678.4 643.488   2
  -5  -1 -14 10957.4 459.578   8
  -5  -1 -14 10841.5 452.292   7
   5  -1  14 10311.4 662.883   3
  -5  -1 -15 2757.60 333.863   2
  -5  -1 -15 2600.36 233.132   8
  -5  -1 -15 2824.26 331.688   1
  -5  -1 -15 2150.17 214.789   7
   5  -1  15 2277.16 324.293   3
  -5  -1 -16 2835.60 250.893   8
  -5  -1 -16 2694.46 246.765   7
  -5  -1 -17 1847.31 209.281   8
  -5  -1 -17 1686.20 198.606   7
  -5  -1 -18 7213.03 409.364   8
  -5  -1 -18 7264.36 417.122   7
  -5  -1 -19 288.687 102.205   8
  -5  -1 -19 257.612 101.906   7
  -5  -1 -20 7160.53 394.184   8
  -5  -1 -20 7622.90 409.035   7
  -5  -1 -21 1469.04 176.136   8
  -5  -1 -21 1288.80 165.028   7
  -5  -1 -22 558.361 110.644   8
  -5  -1 -22 678.076 120.343   7
  -5  -1 -23 79.4260 51.9336   8
  -5  -1 -23 136.719 65.1772   7
  -5  -1 -24 1523.47 139.493   7
  -5  -1 -24 1629.13 142.892   8
  -5  -1 -25 101.280 38.6740   7
  -5  -1 -25 102.549 37.7750   8
   5   0 -29 39.9571 42.1309   7
   5   0 -29 67.3274 25.9170   8
   5   0 -28 2800.10 167.506   8
   5   0 -28 3342.22 214.663   7
   5   0 -27 64.7629 51.4790   7
   5   0 -27 48.4441 44.7188   8
   5   0 -26 73.8155 43.7868   8
   5   0 -26 91.0573 57.8030   7
   5   0 -25 692.590 114.636   8
   5   0 -25 557.969 116.896   7
   5   0 -24 2181.74 201.913   8
   5   0 -24 2375.47 225.100   7
   5   0 -23 434.518 103.041   8
   5   0 -23 354.142 94.8940   7
  -5   0  22 285.666 79.4966  10
   5   0 -22 343.162 113.055   7
  -5   0  21-16.2684 46.4064  10
   5   0 -21 74.4863 50.0582   7
   5   0 -20 12123.1 499.485   7
  -5   0  20 11341.7 413.936  10
  -5   0  20 12676.0 693.736   3
  -5   0  19 800.349 120.607  10
  -5   0  19 660.988 145.557   3
   5   0 -19 673.220 123.013   7
  -5   0  18 134843. 1911.67   4
  -5   0  18 138150. 2198.28   3
  -5   0  17 341.167 112.026   3
   5   0 -16 3089.06 264.240   2
  -5   0  16 3320.82 324.994   3
  -5   0  15 379.402 111.887   3
   5   0 -15 242.506 87.2263   2
   5   0 -14 12171.8 480.731   2
  -5   0  14 12450.7 576.231   3
  -5   0  13 35.8821 60.1692   3
   5   0 -13 57.4497 35.1740   2
  -5   0  12 74576.0 1286.82   3
   5   0 -12 75524.9 1063.42   2
  -5   0  11 134.482 70.0217   3
   5   0 -11 123.933 47.6282   2
   5   0 -10 4435.88 227.705   2
  -5   0  10 4162.55 279.157   3
   5   0  -9 3017.42 174.348   2
  -5   0   9 2833.32 223.199   3
  -5   0   8 79907.5 1064.61   4
   5   0  -8 79321.0 828.557   2
  -5   0   8 80590.7 1136.98   3
  -5   0   7 2473.55 183.265   4
   5   0  -7 2323.01 132.963   2
  -5   0   7 2267.69 186.676   3
   5   0  -6 84383.1 728.350   2
  -5   0   6 86058.4 1043.15   4
   5   0  -5 45.4102 28.5293   2
  -5   0   5 12.7249 31.4849   4
  -5   0   4 76148.6 921.908   4
  -5   0   4 71729.5 618.351   1
  -5   0   3 19365.2 464.140   4
  -5   0   3 17970.5 311.545   1
  -5   0   2 91897.7 1010.76   4
  -5   0   2 87994.0 721.930   1
  -5   0   1 5326.59 244.204   4
  -5   0   1 5344.45 189.971   1
  -5   0   0 33021.5 611.813   4
  -5   0   0 32454.8 491.893   1
  -5   0  -1 14694.3 418.584   4
  -5   0  -1 15988.4 375.137   1
  -5   0  -2 118598. 1223.60   4
  -5   0  -2 118540. 1094.48   1
  -5   0  -3 9140.20 325.239   1
  -5   0  -3 8128.99 327.425   4
  -5   0  -4 8633.92 337.776   1
  -5   0  -4 7931.84 332.411   4
  -5   0  -5 50.3830 50.3368   1
  -5   0  -5 12.1951 54.3583   4
   5   0   6 19166.8 637.745   3
  -5   0  -6 20505.3 590.822   1
  -5   0  -6 19802.3 558.728   4
  -5   0  -7 104.016 68.7772   1
  -5   0  -7 90.2558 62.5209   4
   5   0   7 53.4080 58.0734   3
  -5   0  -8 6438.48 370.518   1
  -5   0  -8 6112.87 333.688   4
   5   0   8 6271.05 404.659   3
  -5   0  -9 1554.37 190.939   1
  -5   0  -9 1217.45 157.409   4
   5   0   9 1731.82 229.207   3
  -5   0 -10 9087.52 485.287   1
   5   0  10 9830.70 544.647   3
  -5   0 -11 91.4488 79.9715   1
  -5   0 -11 70.7748 58.5144   2
   5   0  11 200.835 79.0957   3
   5   0  12 32.5766 61.8175   3
  -5   0 -12-6.28460 60.0242   1
  -5   0 -13 2414.56 299.164   1
  -5   0 -13 2377.97 300.468   2
   5   0  13 2111.43 286.979   3
  -5   0 -14 3702.06 378.846   2
   5   0  14 3738.48 381.490   3
  -5   0 -14 3934.76 377.137   1
  -5   0 -15 5241.39 330.577   8
  -5   0 -15 5595.36 486.188   2
   5   0  15 4998.10 449.444   3
  -5   0 -15 5051.19 329.457   7
  -5   0 -16 18030.8 618.073   8
  -5   0 -16 18543.1 901.699   2
  -5   0 -16 18212.2 645.475   7
  -5   0 -17-28.6943 51.9934   8
  -5   0 -17 47.6856 73.9955   7
  -5   0 -18 3937.88 296.792   8
  -5   0 -18 4143.65 315.598   7
  -5   0 -19 1289.36 183.587   7
  -5   0 -19 1414.86 181.297   8
  -5   0 -20 87.8305 73.1083   8
  -5   0 -20 236.883 93.4015   7
  -5   0 -21 528.873 120.020   7
  -5   0 -21 573.352 113.063   8
  -5   0 -22 5363.88 322.686   7
  -5   0 -22 5168.38 296.672   8
  -5   0 -23 277.554 70.8732   8
  -5   0 -23 357.552 88.1251   7
  -5   0 -24 1150.24 115.631   8
  -5   0 -24 1011.74 123.147   7
  -5   0 -25 1449.06 102.852   8
  -5   0 -25 1653.73 129.921   7
   5   1 -29 26.7440 28.9483   7
   5   1 -28 793.007 103.924   7
   5   1 -27 132.738 66.7078   7
   5   1 -26 1873.56 187.509   7
   5   1 -25 183.542 56.6521   8
   5   1 -25-9.29898 49.6081   7
  -5   1  24 5948.44 313.198   6
   5   1 -24 5506.86 297.541   8
   5   1 -24 6227.18 355.469   7
  -5   1  24 5350.37 280.443  10
   5   1 -23 633.280 123.252   7
   5   1 -23 898.400 125.063   8
  -5   1  23 745.969 126.445   6
  -5   1  23 733.471 115.105  10
   5   1 -22 16354.8 525.983   8
  -5   1  22 15928.1 546.703   6
   5   1 -22 16494.4 583.014   7
  -5   1  22 16486.2 523.266  10
  -5   1  21 219.839 70.5771   6
   5   1 -21 123.376 65.8552   7
  -5   1  21 133.327 68.8322  10
  -5   1  20 7266.05 371.377   6
  -5   1  20 7137.76 345.468  10
   5   1 -20 7497.00 382.858   7
  -5   1  20 7132.43 503.145   3
  -5   1  19 1124.30 139.887  10
   5   1 -19 1086.84 146.533   7
  -5   1  19 997.568 168.666   3
  -5   1  19 1008.96 137.449   6
  -5   1  18 564.939 154.051   3
   5   1 -18 779.533 151.247   2
  -5   1  17 328.348 100.530   3
   5   1 -17 156.385 66.3976   2
   5   1 -16 72483.6 1397.08   2
  -5   1  16 72578.6 1289.87   4
  -5   1  16 72527.6 1456.08   3
  -5   1  15 623.767 138.561   3
  -5   1  15 573.463 119.741   4
   5   1 -15 556.053 114.772   2
  -5   1  14 18832.1 623.707   4
   5   1 -14 18836.8 656.863   2
  -5   1  14 18008.9 674.763   3
  -5   1  13 3244.12 252.756   4
   5   1 -13 3166.54 257.157   2
  -5   1  13 3074.65 268.839   3
  -5   1  12 13847.5 505.260   4
   5   1 -12 13357.6 502.705   2
  -5   1  12 13825.1 543.936   3
  -5   1  11 164.943 71.0577   4
  -5   1  11 184.106 71.7984   3
   5   1 -11 232.751 82.7017   2
  -5   1  10 64431.9 1086.97   3
  -5   1  10 60999.4 993.435   4
   5   1 -10 62247.3 979.243   2
  -5   1   9 3976.11 245.015   4
   5   1  -9 3861.41 234.936   2
  -5   1   9 3893.58 255.825   3
  -5   1   8 880.272 119.528   4
  -5   1   8 897.934 128.765   3
   5   1  -8 596.080 90.1690   2
  -5   1   7 2269.43 174.874   4
   5   1  -7 2207.10 164.796   2
  -5   1   6 78770.6 1019.98   4
   5   1  -6 77643.4 915.150   2
  -5   1   5 4301.70 239.634   4
   5   1  -5 4120.41 207.060   2
   5   1  -4 8243.22 284.599   2
  -5   1   4 8867.28 335.194   4
[truncated: 807,435 more chars]
